# Supplementary material
Source: PubMed Central journal article supplement (PMC3808650)
Supplement: 1302664110_sapp.pdf [file 1302664110_sapp.pdf]

# **Expanded therapeutic potential in activity space of next-generation**

## **5-nitroimidazole antimicrobials with broad structural diversity**

Yukiko Miyamoto, Jarosław Kalisiak, Keith Korthals, Tineke Lauwaet, Dae Young Cheung,

Ricardo Lozano, Eduardo R. Cobo, Peter Upcroft, Jacqueline A. Upcroft, Douglas E. Berg,

Frances D. Gillin, Valery V. Fokin, K. Barry Sharpless, and Lars Eckmann

## **Supplemental Materials and Methods**

### **1. Synthesis and structural characterization**

#### **1.1. General**

All chemical reagents and solvents were purchased from commercial suppliers and used without further purifications.  $^1\text{H}$ ,  $^{13}\text{C}$  NMR spectra were obtained on Varian Inova 400 MHz or Bruker 500 MHz spectrometers. The chemical shifts ( $\delta$ ) were expressed in parts per million (ppm) relative to residual:  $\text{CHCl}_3$  ( $\delta\text{H}$  7.26 ppm),  $\text{CDCl}_3$  ( $\delta\text{C}$  77.0 ppm),  $\text{CH}_3\text{SOCH}_3$  ( $\delta\text{H}$  2.50 ppm) and  $\text{CD}_3\text{SOCD}_3$  ( $\delta\text{C}$  39.43 ppm). NMR acquisitions were performed at 295 K unless otherwise noted. Abbreviations are: s, singlet; d, doublet; t, triplet; q, quartet, brs, broad singlet. High resolution mass spectrometry was performed on an Agilent ES-TOF instrument at The Scripps Center for Metabolomics and Mass Spectrometry. Reactions were monitored by LCMS analysis (Hewlett-Packard Series 1100, ESI MS) eluting with 0.1% trifluoroacetic acid in  $\text{H}_2\text{O}$  and 0.05% trifluoroacetic acid in  $\text{CH}_3\text{CN}$  and/or TLC chromatography using Merck TLC Silica Gel 60 F254 plates and visualized by staining with cerium molybdate (Hanessian's Stain) or by

absorbance of UV light at 254 nm. Crude reaction mixtures were purified by column chromatography using Merck Silica Gel 60 as stationary phase. The purity of all synthesized alkynes was  $\geq 90\%$  based on the LCMS analysis. The purity and conversion of all “Click chemistry” reaction mixtures were  $\geq 80\%$  based on the LCMS analysis. Selected products for in-vivo studies were prepared in pure form and characterized by  $^1\text{H}$ ,  $^{13}\text{C}$  NMR and HRMS (ESI TOF).

## 1.2. Synthesis of azides (A-F)

### 1.2.1. Synthesis of azide A

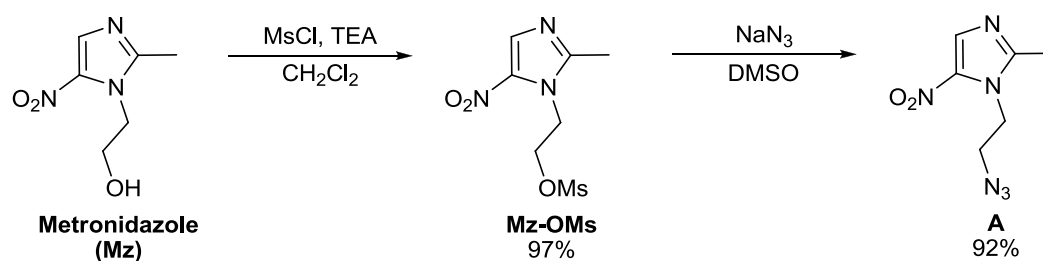

**Scheme 1.** Synthesis of azide A.

**2-(2-Methyl-5-nitro-1H-imidazol-1-yl)ethyl methanesulfonate (Mz-OMs).** A solution of methanesulfonyl chloride (27.0 mL, 40.0 g, 349 mmol, 1.2 equiv.) in CH<sub>2</sub>Cl<sub>2</sub> (50 mL) was added dropwise into stirred, cooled ( $\sim 10^\circ\text{C}$ ) suspension of metronidazole (50 g, 292 mmol), TEA (61 mL, 44.3 g, 439 mmol, 1.5 equiv.) in CH<sub>2</sub>Cl<sub>2</sub> (250 mL) (1, 2). After addition the reaction was stirred at r.t. for 4 h then evaporated. The solid residue was washed with H<sub>2</sub>O and dried on vacuum to give white solid (71 g, 97%).  $^1\text{H}$  NMR (400 MHz, d<sub>6</sub>-DMSO)  $\delta$ = 8.06 (s, 1H), 4.65 (t,  $J$ =5.0 Hz, 2H), 4.55 (t,  $J$ =5.0 Hz, 2H), 3.15 (s, 3H), 2.46 (s, 3H).  $^{13}\text{C}$  NMR (100 MHz, d<sub>6</sub>-DMSO)  $\delta$ = 151.6, 138.3, 133.0, 68.4, 45.0, 36.6, 13.9.

**1-(2-Azidoethyl)-2-methyl-5-nitro-1H-imidazole (A).** A suspension of **Mz-OMs** (71 g, 285 mmol) and  $\text{NaN}_3$  (22.2 g, 341 mmol, 1.2 equiv.) in DMSO (600 mL) was stirred at 70°C for 4 h. Subsequently, the mixture was cooled, diluted with  $\text{H}_2\text{O}$  (1 L) and brine (2 L) and extracted using  $\text{CHCl}_3$  (4×300 mL). Combined organic layers were washed with  $\text{H}_2\text{O}$  (2×500 mL), dried over  $\text{MgSO}_4$ , filtered and evaporated to give white solid of **A** (51.7g, 92%).  $^1\text{H}$  NMR (400 MHz,  $\text{CDCl}_3$ )  $\delta$ = 7.95 (s, 1H), 4.41 (t,  $J$ =5.6 Hz, 2H), 3.75 (t,  $J$ =5.6 Hz, 2H), 2.52 (s, 3H).  $^{13}\text{C}$  NMR (100 MHz,  $\text{CDCl}_3$ )  $\delta$ = 151.2, 138.1, 133.3, 50.8, 45.4, 14.4.

### 1.2.2. Synthesis of azide **B**

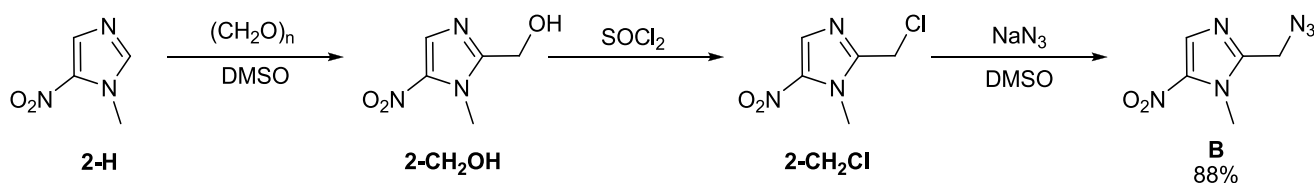

**Scheme 2.** Synthesis of azide **B**.

**(1-Methyl-5-nitro-1H-imidazol-2-yl)methanol (2-CH<sub>2</sub>OH).** The title compound was prepared according to the literature procedure (3).  $^1\text{H}$  NMR (400 MHz,  $d_6$ -DMSO)  $\delta$ = 8.00 (s, 1H), 5.67 (t,  $J$ =6.0 Hz, 1H), 4.58 (d,  $J$ =6.0 Hz, 2H), 3.92 (s, 3H).  $^{13}\text{C}$  NMR (100 MHz,  $d_6$ -DMSO)  $\delta$ = 152.3, 139.2, 131.4, 56.0, 33.2. ESI MS (MeOH) for  $[\text{M}+\text{H}]^+$  = 158.2 Da.

**2-(Chloromethyl)-1-methyl-5-nitro-1H-imidazole (2-CH<sub>2</sub>Cl).** The title compound was prepared according to the literature procedure (4).  $^1\text{H}$  NMR (400 MHz,  $\text{CDCl}_3$ )  $\delta$ = 7.93 (s, 1H), 4.67 (s, 2H), 4.03 (s, 3H).  $^{13}\text{C}$  NMR (100 MHz,  $\text{CDCl}_3$ )  $\delta$ = 147.1, 139.6, 131.7, 36.1, 33.8. ESI MS (MeOH) for  $[\text{M}+\text{H}]^+$  = 176.2 Da.

**2-(Azidomethyl)-1-methyl-5-nitro-1H-imidazole (B).** A mixture of **2-CH<sub>2</sub>Cl** (3 g, 17.1 mmol),  $\text{NaN}_3$  (1.22 g, 18.8 mmol, 1.1 equiv.) in DMSO (20 mL) was stirred at r.t. overnight.

Subsequently, the mixture was diluted with EtOAc (150 mL) and washed with brine (5×25 mL). The organic layer was passed through short silica-gel pad and evaporated to give **B** as a brown oil (2.76 g, 88%). <sup>1</sup>H NMR (400 MHz, CDCl<sub>3</sub>) δ= 7.94 (s, 1H), 4.49 (s, 2H), 3.98 (s, 3H). <sup>13</sup>C NMR (100 MHz, CDCl<sub>3</sub>) δ= 146.6, 139.7, 131.8, 46.7, 33.6.

### 1.2.3. Synthesis of azide **C**

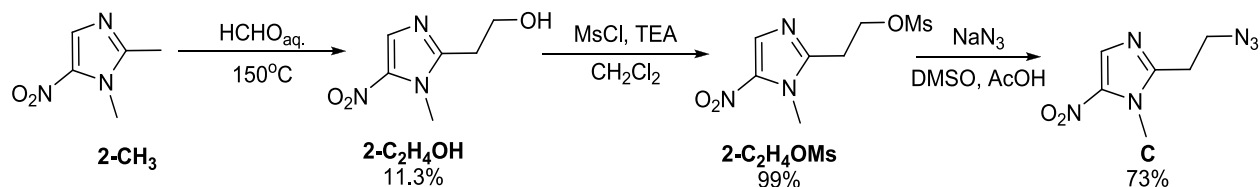

**Scheme 3.** Synthesis of azide **C**.

**2-(1-Methyl-5-nitro-1H-imidazol-2-yl)ethanol (2-C<sub>2</sub>H<sub>4</sub>OH).** A mixture of **2-CH<sub>3</sub>** (40 g, 283 mmol) and 37% formaldehyde solution in H<sub>2</sub>O (140 mL, 1.86 mol, 6.6 equiv.) in high-pressure resistant sealed glass tube was heated at 150°C for 12 h, then cooled down and carefully opened. The brown solution was stirred with EtOAc (1 L) at 60°C for 15 min. The organic layer was separated and evaporated. The residue was purified by column chromatography (silica-gel, EtOAc→5% MeOH in EtOAc) to give a yellowish solid that was additionally purified by crystallization from CH<sub>3</sub>CN (20 mL) (5.5 g, 11.3%). <sup>1</sup>H NMR (400 MHz, d<sub>6</sub>-DMSO) δ= 8.02 (s, 1H), 4.84 (t, *J*=5.4 Hz, 1H, -OH), 3.85 (s, 3H, N-Me), 3.77-3.73 (m, 2H), 2.91 (t, *J*=6.0 Hz, 2H). <sup>13</sup>C NMR (100 MHz, d<sub>6</sub>-DMSO) δ= 152.4, 138.7, 132.4, 58.8, 33.1, 30.6.

**2-(1-Methyl-5-nitro-1H-imidazol-2-yl)ethyl methanesulfonate (2-C<sub>2</sub>H<sub>4</sub>OMs).** To a suspension of **2-C<sub>2</sub>H<sub>4</sub>OH** (2 g, 11.7 mmol) and TEA (1.8 mL, 1.3 g, 12.9 mmol, 1.1 equiv.) in anhydrous CH<sub>2</sub>Cl<sub>2</sub> (30 mL), methanesulfonyl chloride (1 mL, 1.48 g, 12.9 mmol, 1.1 equiv.) was

added. The mixture was stirred at r.t. for 1 h and H<sub>2</sub>O (30 mL) was added. The organic layer was dried over MgSO<sub>4</sub>, filtered and evaporated to give a yellow solid (2.9 g, 99%). The crude product was used in the next step without purification. ESI MS (MeOH) for [M+H]<sup>+</sup> = 250.1 Da.

**2-(2-Azidoethyl)-1-methyl-5-nitro-1H-imidazole (C).** To a mixture of **2-C<sub>2</sub>H<sub>4</sub>OMs** (7 g, 28 mmol) and AcOH (8 mL, 8.4 g, 140 mmol, 5 equiv.) in DMSO (60 mL), NaN<sub>3</sub> (5.5 g, 84 mmol, 3 equiv.) was added. The mixture was stirred at r.t. for 1 day, and then diluted with H<sub>2</sub>O (30 mL) and EtOAc (100 mL). The organic layer was washed with brine (5×25 mL), dried over MgSO<sub>4</sub>, filtered and evaporated. The residue was purified by column chromatography (silica-gel, EtOAc) to give an orange solid (4 g, 73%). <sup>1</sup>H NMR (400 MHz, CDCl<sub>3</sub>) δ= 7.97 (s, 1H), 3.94 (s, 3H), 3.83 (t, *J*=6.6 Hz, 2H), 2.96 (t, *J*=6.6 Hz, 2H). <sup>13</sup>C NMR (100 MHz, CDCl<sub>3</sub>) δ= 149.9, 132.4, 125.6, 48.6, 33.2, 27.4. ESI MS (MeOH) for [M+H]<sup>+</sup> = 197.4 Da.

- Elimination of the methanesulfonic acid takes place and 1-Methyl-5-nitro-2-vinyl-1H-imidazole is a major side product. Addition of AcOH reduces amount of the vinyl side-product.
- **CAUTION!** Any experiments that may result in the formation of hydrazoic acid (HN<sub>3</sub>) should be performed in a well-ventilated fume hood and behind a blast shield. Sodium azide should not be mixed with strong acids.

### 1.2.4. Synthesis of azide **D**

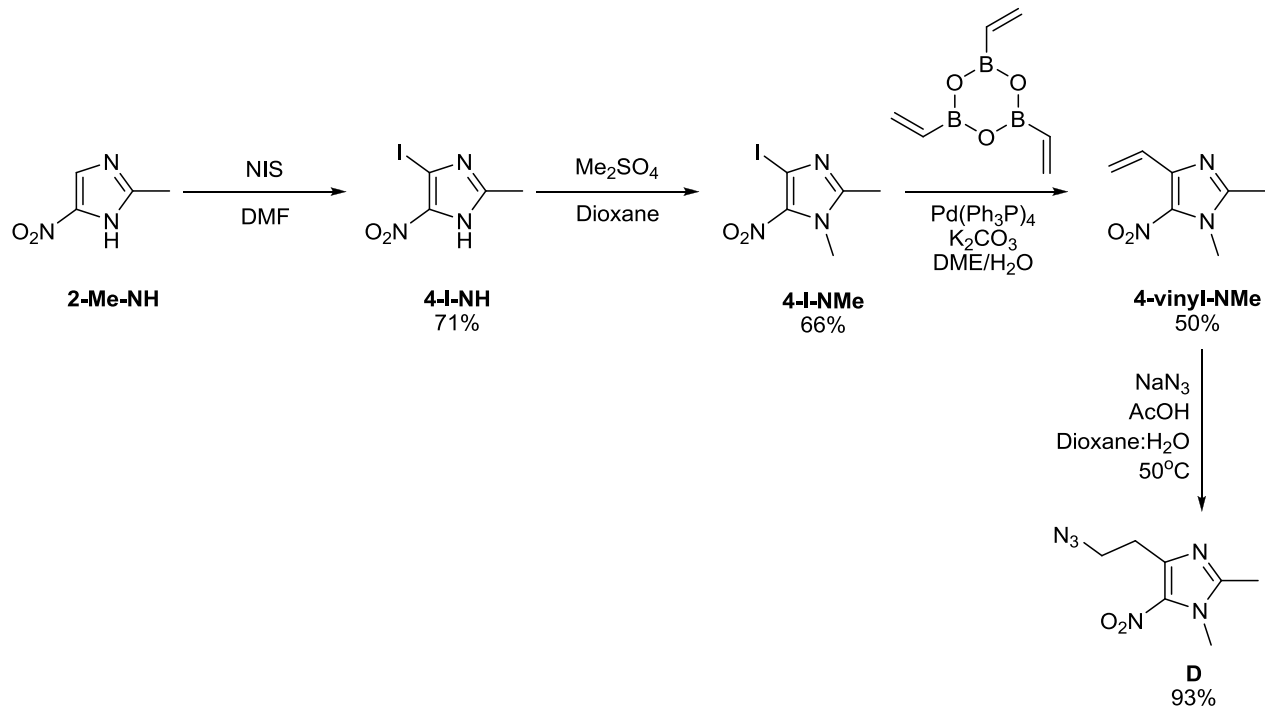

**Scheme 4.** Synthesis of azide **D**.

**4-Iodo-2-methyl-5-nitro-1H-imidazole (4-I-NH).** The title compound was prepared using a similar literature procedure as for the bromination reaction (5). To a stirred warm (55°C) solution of **2-Me-NH** (45 g, 354 mmol) in anhydrous DMF (150 mL), NIS (87.5 g, 389 mmol, 1.1 equiv.) was added in one portion. After addition, the temperature was increased to 80°C and the reaction was carried out for 4 h. Subsequently, the reaction was cooled and poured into H<sub>2</sub>O (2 L). A yellow solid was filtered, washed with 10% Na<sub>2</sub>S<sub>2</sub>O<sub>3</sub> solution, H<sub>2</sub>O and dried on high vacuum (63.5 g, 71%). ESI MS (MeOH) for [M+H]<sup>+</sup> = 254.1 Da.

**4-Iodo-1,2-dimethyl-5-nitro-1H-imidazole (4-I-NMe).** A mixture of **4-I-NH** (63.5 g, 251 mmol) and Me<sub>2</sub>SO<sub>4</sub> (31.6 g, 23.7 mL, 251 mmol) in 1,4-dioxane (600 mL) was stirred under reflux for 3 h and then evaporated. The resulting yellow oil was dissolved in H<sub>2</sub>O (330 mL) and neutralized with saturated NaHCO<sub>3(aq)</sub>. Yellow solid was filtered and washed with 1 M NaOH to

give the product as a yellow solid (44 g, 66%).  $^1\text{H}$  NMR (400 MHz,  $\text{d}_6\text{-DMSO}$ )  $\delta$ = 3.80 (s, 3H), 2.40 (s, 3H).  $^{13}\text{C}$  NMR (100 MHz,  $\text{d}_6\text{-DMSO}$ )  $\delta$ = 152.0, 139.5, 92.6, 34.4, 13.5. ESI MS (MeOH) for  $[\text{M}+\text{H}]^+ = 268.2$  Da. The product contains approx. 15% of the 5-iodo-1,2-dimethyl-4-nitro-1*H*-imidazole isomer. The structure of **4-I-NH** was confirmed by comparison with the literature NMR spectra (6).

**1,2-Dimethyl-5-nitro-4-vinyl-1*H*-imidazole (4-vinyl-NMe)**. The title compound was prepared using a similar literature procedure (7). To a mixture of **4-I-NMe** (17.7 g, 66.4 mmol) in degassed DME (520 mL),  $\text{Pd}(\text{PPh}_3)_4$  (7.67 g, 6.6 mmol, 10% mol.) was added and the reaction was stirred under  $\text{N}_2$  at r.t. for 20 min. Subsequently,  $\text{K}_2\text{CO}_3$  (9.15 g, 66.4 mmol),  $\text{H}_2\text{O}$  (160 mL) and vinylboronic anhydride pyridine complex (16 g, 66.4 mmol) were added. The reaction was stirred under reflux under  $\text{N}_2$  for overnight, then evaporated to the final volume (~100 mL) and extracted using  $\text{Et}_2\text{O}$  (2×300 mL). The combined organic layers were washed with 1 M HCl (4×50 mL). The aqueous layers were filtered, saturated with solid NaCl and neutralized with 2 M NaOH, and the aqueous mixture was transferred to separatory funnel and extracted using  $\text{Et}_2\text{O}$  (5×100 mL). The organic layers were dried over  $\text{MgSO}_4$  and filtered. The product crystallized from  $\text{Et}_2\text{O}$ , yellowish solid (5.5 g, 50%).  $^1\text{H}$  NMR (400 MHz,  $\text{CDCl}_3$ )  $\delta$ = 7.33-7.25 (m, 1H), 6.31 (dd,  $J=17.2$ , 1.6 Hz, 1H), 5.57 (dd,  $J=17.2$ , 1.6 Hz, 1H), 3.84 (s, 3H), 2.44 (s, 3H).  $^{13}\text{C}$  NMR (100 MHz,  $\text{CDCl}_3$ )  $\delta$ = 148.8, 141.6, 126.6, 121.8, 33.8, 14.1. ESI MS (MeOH) for  $[\text{M}+\text{H}]^+ = 168.4$  Da.

**4-(2-Azidoethyl)-1,2-dimethyl-5-nitro-1*H*-imidazole (D)**. To a mixture of **4-vinyl-NMe** (2 g, 12 mmol),  $\text{NaN}_3$  (2.34 g, 36 mmol, 3 equiv.) in 1,4-dioxane: $\text{H}_2\text{O}$  (3:1, 80 mL), TEA (5.05 mL, 3.64 g, 36 mmol, 3 equiv.) and AcOH (6.86 mL, 7.2 g, 120 mmol, 10 equiv.) were added. The mixture was stirred at 50°C for 2 days and then cooled. The reaction was neutralized with solid

NaHCO<sub>3</sub> and evaporated to the final volume of ~20 mL. The remaining solution was diluted with H<sub>2</sub>O (100 mL) and extracted using EtOAc (2×100 mL). The combined organic layers were washed with brine, dried over MgSO<sub>4</sub>, filtered and evaporated to give a red oil (2.35 g, 93%). <sup>1</sup>H NMR (400 MHz, CDCl<sub>3</sub>) δ= 3.85 (s, 3H), 3.65 (t, *J*=6.8 Hz, 2H), 3.21 (t, *J*=6.8 Hz, 2H), 2.43 (s, 3H). <sup>13</sup>C NMR (100 MHz, CDCl<sub>3</sub>) δ= 148.3, 143.7, 49.0, 33.9, 29.1, 14.0. ESI MS (MeOH) for [M+H]<sup>+</sup> = 211.2 Da.

- **CAUTION!** Any experiments that may result in the formation of hydrazoic acid (HN<sub>3</sub>) should be performed in a well-ventilated fume hood and behind a blast shield. Sodium azide should not be mixed with strong acids.
- The product slowly decomposes at r.t. and should be stored at +4°C.

### 1.2.5. Synthesis of azide **E**

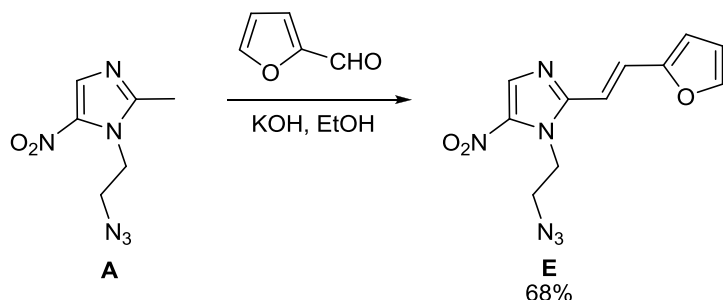

**Scheme 5.** Synthesis of azide **E**.

**(E)-1-(2-Azidoethyl)-2-(2-(furan-2-yl)vinyl)-5-nitro-1H-imidazole (E).** A mixture of **A** (4 g, 20.4 mmol), 2-furaldehyde (2.35 g, 24.5 mmol, 1.2 equiv.) and KOH (85%, 1.3 g, 20.4 mmol) in EtOH (20 mL) was stirred at 60°C for one day. After cooling, the mixture was diluted with H<sub>2</sub>O (200 mL) and a brown-yellow solid was filtered. Crude product was dissolved in EtOAc, passed through a short silica-gel pad and evaporated to give a yellow-red solid (3.8 g, 68%). <sup>1</sup>H NMR



(400 MHz, CDCl<sub>3</sub>)  $\delta$ = 8.10 (s, 1H), 7.64 (d,  $J$ =15.6 Hz, 1H), 7.48 (s, 1H), 6.82 (d,  $J$ =15.6 Hz, 1H), 6.58 (d,  $J$ =3.2 Hz, 1H), 6.49-6.47 (m, 1H), 4.58 (t,  $J$ =5.6 Hz, 2H), 3.77 (t,  $J$ =5.6 Hz, 2H). <sup>13</sup>C NMR (100 MHz, CDCl<sub>3</sub>)  $\delta$ = 151.5, 150.6, 144.3, 138.2, 135.1, 126.6, 114.1, 112.5, 109.0, 50.8, 44.6. ESI MS (MeOH) for [M+H]<sup>+</sup> = 275.2 Da.

### 1.2.6. Synthesis of azide F

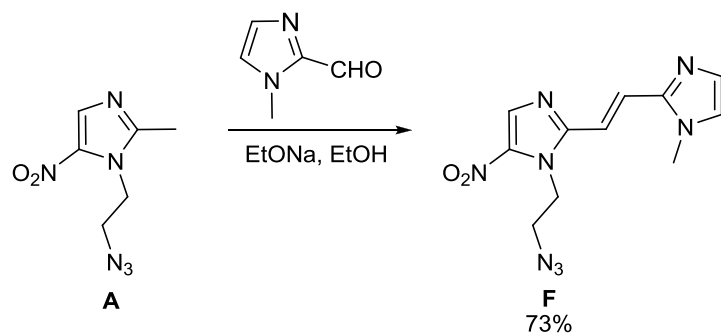

#### Scheme 6. Synthesis of azide F.

**(E)-1-(2-Azidoethyl)-2-(2-(1-methyl-1H-imidazol-2-yl)vinyl)-5-nitro-1H-imidazole (F).** To a solution of **A** (2.97 g, 15.1 mmol) in EtOH (15 mL), EtONa (2.55 g, 37.5 mmol, 2.5 equiv.) was added. The mixture was stirred at r.t. for 10 min and 1-methyl-1H-imidazole-2-carbaldehyde (2 g, 18.2 mmol, 1.2 equiv.) was added. The reaction was carried out at 60°C for 2 h and then cooled and diluted with H<sub>2</sub>O (100 mL). The mixture was extracted using EtOAc (2×100 mL) and the combined organic layers were dried over MgSO<sub>4</sub>, filtered and evaporated. The residue was purified by column chromatography (silica-gel, EtOAc→10% MeOH in CHCl<sub>3</sub>) to give an orange solid that was additionally purified by crystallization from EtOAc (3.2 g, 73%). <sup>1</sup>H NMR (400 MHz, d<sub>6</sub>-DMSO)  $\delta$ = 8.28 (s, 1H), 7.69 (d,  $J$ =15.2 Hz, 1H), 7.39 (d,  $J$ =15.0 Hz, 1H), 7.31 (s, 1H), 7.07 (s, 1H), 4.69 (t,  $J$ =5.4 Hz, 2H), 3.82 (t,  $J$ =5.4 Hz, 2H), 3.79 (s, 3H). <sup>13</sup>C NMR (100

MHz, d<sub>6</sub>-DMSO)  $\delta$ = 149.9, 143.5, 138.6, 135.0, 129.3, 124.2, 123.5, 113.7, 50.4, 44.5, 32.5. ESI

MS (MeOH) for  $[M+H]^+$  = 289.2 Da.

### 1.3. List and synthesis of alkynes for training set compounds

#### 1.3.1. List of alkynes 101-163

The following alkynes were used to synthesize triazole compounds for the training set. Of these, alkynes **101-137** were newly synthesized, while alkynes **138-163** were obtained from commercial sources.

| Synthesized Alkynes (101-137)                                                                     |                                                                                                   |                                                                                                     |
|---------------------------------------------------------------------------------------------------|---------------------------------------------------------------------------------------------------|-----------------------------------------------------------------------------------------------------|
| 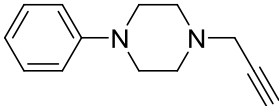<br><b>101</b>   | <br><b>102</b>   | <br><b>103</b>   |
| <br><b>104</b> | <br><b>105</b> | <br><b>106</b> |
| <br><b>107</b> | <br><b>108</b> | <br><b>109</b> |

|                                                                                                       |                                                                                                       |                                                                                                         |
|-------------------------------------------------------------------------------------------------------|-------------------------------------------------------------------------------------------------------|---------------------------------------------------------------------------------------------------------|
| 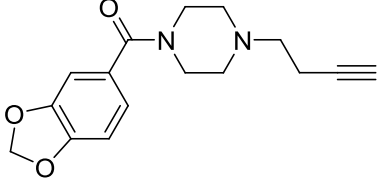 <p><b>110</b></p>   |  <p><b>111</b></p>   |  <p><b>112</b></p>   |
|  <p><b>113</b></p>   |  <p><b>114</b></p>   |  <p><b>115</b></p>   |
|  <p><b>116</b></p>   |  <p><b>117</b></p>   |  <p><b>118</b></p>   |
|  <p><b>119</b></p> |  <p><b>120</b></p> |  <p><b>121</b></p> |
|  <p><b>122</b></p> |  <p><b>123</b></p> |  <p><b>124</b></p> |

|                                                                                                       |                                                                                                      |                                                                                                        |
|-------------------------------------------------------------------------------------------------------|------------------------------------------------------------------------------------------------------|--------------------------------------------------------------------------------------------------------|
| 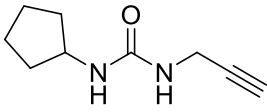 <p><b>125</b></p>   |  <p><b>126</b></p>  |  <p><b>127</b></p>  |
|  <p><b>128</b></p>   |  <p><b>129</b></p>  |  <p><b>130</b></p>  |
|  <p><b>131</b></p>   |  <p><b>132</b></p>  |  <p><b>133</b></p>  |
|  <p><b>134</b></p>  |  <p><b>135</b></p> |  <p><b>136</b></p> |
|  <p><b>137</b></p> |                                                                                                      |                                                                                                        |

**Commercially available alkynes (138-163)**

|                                                                                                       |                                                                                                       |                                                                                                         |
|-------------------------------------------------------------------------------------------------------|-------------------------------------------------------------------------------------------------------|---------------------------------------------------------------------------------------------------------|
| 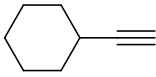 <p><b>138</b></p>   |  <p><b>139</b></p>   |  <p><b>140</b></p>   |
|  <p><b>141</b></p>   |  <p><b>142</b></p>   |  <p><b>143</b></p>   |
|  <p><b>144</b></p>   |  <p><b>145</b></p>   |  <p><b>146</b></p>   |
|  <p><b>147</b></p> |  <p><b>148</b></p> |  <p><b>149</b></p> |
|  <p><b>150</b></p> |  <p><b>151</b></p> |  <p><b>152</b></p> |
|  <p><b>153</b></p> |  <p><b>154</b></p> |  <p><b>155</b></p> |

|                                                                                                 |                                                                                                 |                                                                                                   |
|-------------------------------------------------------------------------------------------------|-------------------------------------------------------------------------------------------------|---------------------------------------------------------------------------------------------------|
| 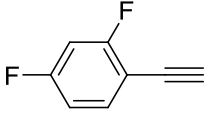<br><b>156</b> | <br><b>157</b> | <br><b>158</b> |
| <br><b>159</b> | <br><b>160</b> | <br><b>161</b> |
| <br><b>162</b> | <br><b>163</b> |                                                                                                   |

### 1.3.2. Synthesis of alkynes 101-137

Compounds **117** (8), **118** (9), **119** (10), **120** (11), **122** (11), **131** (12), **135** (13), **137** (14) were prepared according to published procedures. Alkynes **102**, **103**, **107**, **116**, **121**, **133** were described before but without general synthetic procedures (15).

#### Synthesis of alkynes 101-104, 108

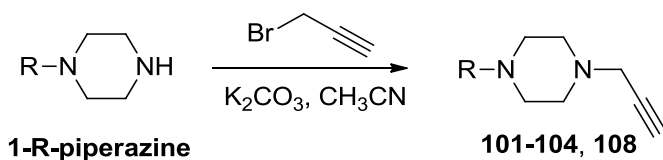

**Scheme 7.** General procedure for the synthesis of alkynes **101-104, 108**.

**General procedure:** To a mixture of an appropriate *N*-substituted piperazine (32 mmol) and anhydrous  $\text{K}_2\text{CO}_3$  (4.4 g, 32 mmol) in anhydrous  $\text{CH}_3\text{CN}$  (50 mL), propargyl bromide (80%

solution in toluene, 3.6 mL, 4.8 g, 32 mmol) was added. The mixture was stirred overnight under reflux, and then filtered and evaporated. The residue was purified by column chromatography (Hexanes:EtOAc).

### Synthesis of alkynes 105-106

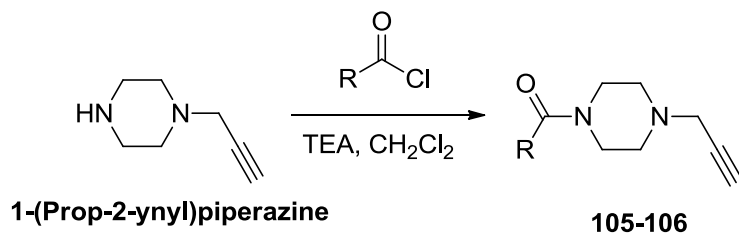

**Scheme 8.** General procedure for the synthesis of alkynes **105-106**.

**General procedure:** To a mixture of 1-(prop-2-ynyl)piperazine (**16**) (1.25 g, 10.1 mmol) and TEA (1.4 mL, 1.0 g, 10.1 mmol) in anhydrous  $\text{CH}_2\text{Cl}_2$  (30 mL), an appropriate acid chloride (10.1 mmol) was added. The mixture was stirred at r.t. overnight and then diluted with  $\text{H}_2\text{O}$  (30 mL). The organic layer was dried over  $\text{MgSO}_4$ , filtered and evaporated. The product was used without further purification.

### Synthesis of alkyne 107

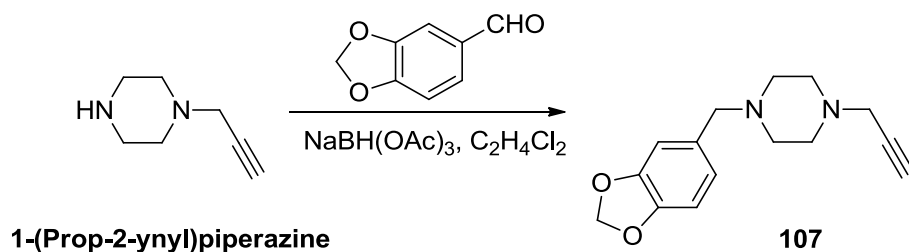

**Scheme 9.** Synthesis of alkyne **107**.

**1-(Benzo[d][1,3]dioxol-5-ylmethyl)-4-(prop-2-ynyl)piperazine (107):** To a mixture of 1-(prop-2-ynyl)piperazine(16) (1.25 g, 10.1 mmol) and the aldehyde (1.51 g, 10.1 mmol) in anhydrous  $\text{CH}_2\text{Cl}_2$  (30 mL) and AcOH (12 mg, 0.2 mmol, 2% mol.),  $\text{NaBH}_3\text{CN}$  (0.95 g, 15.1 mmol, 1.5 equiv.) was added. The mixture was stirred at r.t. for one day and then diluted with  $\text{H}_2\text{O}$  (30 mL) and saturated  $\text{NaHCO}_3$  (30 mL). The organic layer was dried over  $\text{MgSO}_4$ , filtered and evaporated. The residue was purified by column chromatography (silica-gel, hexanes:EtOAc, 4:6) to give a yellow solid (1.5 g, 57%).

### Synthesis of alkynes 109-111

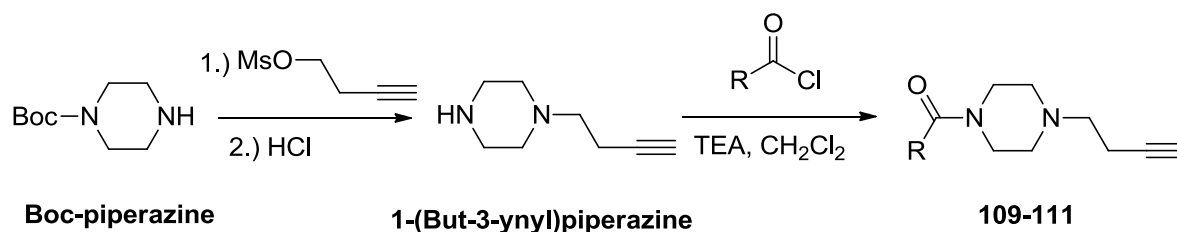

**Scheme 10.** General procedure for the synthesis of alkynes **109-111**.

**1-(But-3-ynyl)piperazine:** To a mixture of Boc-piperazine (11.6 g, 62.8 mmol) and but-3-ynyl methanesulfonate (17) (9.3 g, 62.8 mmol) in  $\text{CH}_3\text{CN}$  (130 mL), DIPEA (11.4 mL, 8.9 g, 69 mmol, 1.1 equiv.) was added. The mixture was stirred under reflux overnight and then evaporated. The yellow oil was dissolved in hexanes:EtOAc (1:1), passed through short silica-gel pad and evaporated. The residue was dissolved in  $\text{HCl}_{\text{conc.}}:\text{H}_2\text{O}$  (20 mL:50 mL), stirred at r.t. for 30 min, and then evaporated to give a white solid of 1-(but-3-ynyl)piperazine dihydrochloride (10.5 g, 80%).

**General procedure for the synthesis of alkynes 109-111:** To a mixture of 1-(but-3-ynyl)piperazine dihydrochloride (2 g, 9.5 mmol) and TEA (4.4 mL, 3.2 g, 31.3 mmol, 3.3 equiv.)



in anhydrous  $\text{CH}_2\text{Cl}_2$  (20 mL), an appropriate acid chloride (9.5 mmol) was added. The mixture was stirred at r.t. overnight and then diluted with  $\text{H}_2\text{O}$  (30 mL). The organic layer was dried over  $\text{MgSO}_4$ , filtered and evaporated, and the product was used without further purification.

### Synthesis of alkynes 112-115

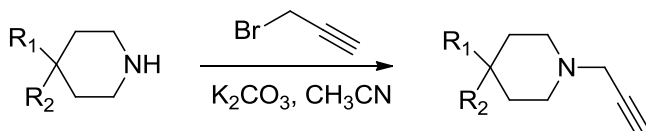

4,4- $\text{R}_1, \text{R}_2$ -piperidine

112-115

**Scheme 11.** General procedure for the synthesis of alkynes 112-115.

**General procedure:** To a mixture of an appropriate  $\text{R}_1, \text{R}_2$ -substituted piperidine (26 mmol) and DIPEA (4.7 mL, 3.7 g, 28.6 mmol, 1.1 equiv.) in  $\text{CH}_2\text{Cl}_2$  (100 mL), propargyl bromide (80% solution in toluene, 3.1 mL, 4.2 g, 28.6 mmol, 1.1 equiv.) was added dropwise. The mixture was stirred at r.t. overnight and evaporated. The residue was purified by column chromatography (hexanes:EtOAc).

### Synthesis of alkynes 130, 132

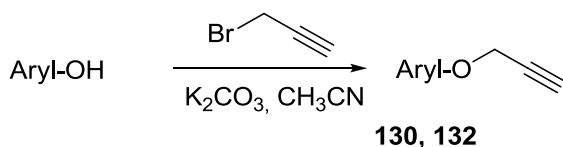

130, 132

**Scheme 12.** General procedure for the synthesis of alkynes 130 and 132.

**General procedure:** A mixture of an appropriate phenol (31.7 mmol) and anhydrous  $\text{K}_2\text{CO}_3$  (4.4 g, 31.7 mmol) in anhydrous  $\text{CH}_3\text{CN}$  (100 mL) was stirred at  $50^\circ\text{C}$  for 15 min, and propargyl

bromide (80% solution in toluene, 3.4 mL, 4.7 g, 31.7 mmol) was added. The mixture was stirred at 50°C for one day, filtered and evaporated. The residue was purified by column chromatography (hexanes:EtOAc or CHCl<sub>3</sub>:MeOH).

### Synthesis of alkyne 116

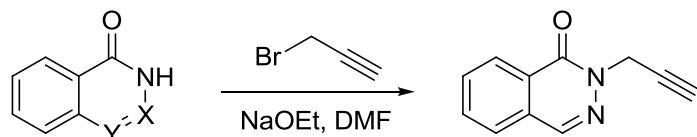

**Scheme 13.** General procedure for the synthesis of alkyne **116**.

**General procedure:** To a mixture of phthalazone in anhydrous DMF (270 mL), NaOEt (21% w/w solution in EtOH, 51 mL, 137 mmol) was added. After 15 min, propargyl bromide (80% solution in toluene, 14.8 mL, 20.4 g, 137 mmol) was added and the reaction mixture was stirred at r.t. for 2 days. After evaporation, the residue was stirred with hot H<sub>2</sub>O (3 L), cooled down and the product was filtered (51%).

### Synthesis of alkyne 121

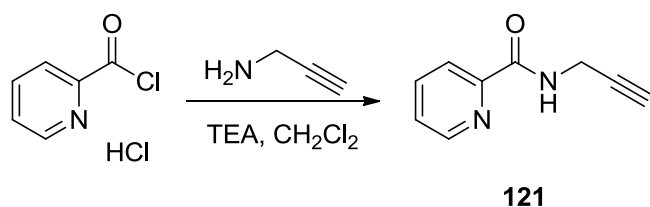

**Scheme 14 .** Synthesis of alkyne **121**.

**N-(Prop-2-ynyl)picolinamide (121).** To a cold (0°C) solution of the acid chloride (5.8 g, 32.6 mmol) in CH<sub>2</sub>Cl<sub>2</sub> (50 mL), a mixture of propargyl amine (1.79 g, 32.6 mmol) and TEA (10.0

mL, 7.24 g, 71.7 mmol, 2.2 equiv.) in CH<sub>2</sub>Cl<sub>2</sub> (20 mL) was added dropwise. After addition the reaction was stirred at r.t. overnight and washed with H<sub>2</sub>O (100 mL). The organic layer was separated, dried over MgSO<sub>4</sub>, filtered and evaporated. The residue was dissolved in Et<sub>2</sub>O, filtered and the solution was evaporated to the final volume of ~50 mL. The product was filtered (3 g, 57%).

### Synthesis of alkyne **123**

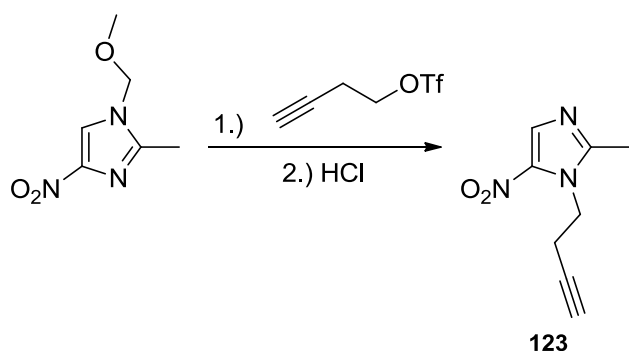

**Scheme 15.** Synthesis of alkyne **123**.

**1-(But-3-ynyl)-2-methyl-5-nitro-1H-imidazole (123).** 1-(Methoxymethyl)-2-methyl-4-nitro-1H-imidazole was obtained using the literature procedure for the similar compound (18). <sup>1</sup>H NMR (400 MHz, CDCl<sub>3</sub>) δ= 7.78 (s, 1H), 5.23 (s, 2H), 3.35 (s, 3H), 2.48 (s, 3H). <sup>13</sup>C NMR (100 MHz, CDCl<sub>3</sub>) δ= 145.4, 119.7, 77.8, 56.6, 13.0. ESI MS (MeOH) for [M+Na]<sup>+</sup> = 194.4 Da. To a solution of but-3-ynyl trifluoromethanesulfonate (19) 15.6 g, 77.2 mmol, 1.1 equiv.) in CH<sub>3</sub>NO<sub>2</sub> (50 mL) a mixture of 1-(methoxymethyl)-2-methyl-4-nitro-1H-imidazole (12 g, 70.2 mmol) in CH<sub>3</sub>NO<sub>2</sub> (50 mL) was added. The mixture was stirred at 70°C for overnight and then evaporated. The residue was dissolved in 1 M HCl (110 mL) and stirred at 70°C for 3 h and then cooled to r.t. The reaction mixture was neutralized with 2 M NaOH and extracted using EtOAc. The

organic layer was dried over  $\text{MgSO}_4$ , filtered and evaporated. The residue was purified by column chromatography (silica-gel,  $\text{Et}_2\text{O}:\text{MeOH}$ , 95:5) to give **38** (5.2 g, 56%) and then unreacted 1-(methoxymethyl)-2-methyl-4-nitro-1*H*-imidazole (3.2 g).  $^1\text{H}$  NMR (400 MHz,  $\text{CDCl}_3$ )  $\delta$ = 7.92 (s, 1H), 4.44 (t,  $J$ =6.4 Hz, 2H), 2.73-2.69 (m, 2H), 2.54 (s, 3H), 2.01-1.99 (m, 1H).  $^{13}\text{C}$  NMR (100 MHz,  $\text{CDCl}_3$ )  $\delta$ = 150.9, 138.2, 133.1, 79.0, 71.7, 44.4, 19.9, 14.6. ESI MS ( $\text{MeOH}$ ) for  $[\text{M}+\text{H}]^+ = 180.4$  Da.

### Synthesis of the alkyne **124**

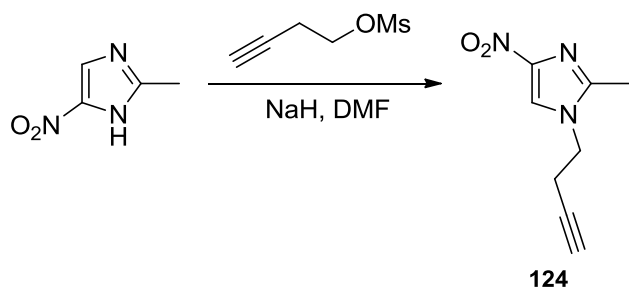

### Scheme 16. Synthesis of alkyne **124**.

**1-(But-3-ynyl)-2-methyl-4-nitro-1*H*-imidazole (**124**).** To a mixture of NaH (95%, 1.6 g, 66.9 mmol, 1.1 equiv.) in anhydrous DMF (60 mL) a solution of 2-methyl-5-nitro-1*H*-imidazole (7.7 g, 60.8 mmol) in anhydrous DMF (60 mL) was added dropwise at r.t. After addition, the mixture was stirred at 90°C for 1 h, then cooled and but-3-ynyl methanesulfonate (**17**) (9 g, 60.8 mmol) was added. The reaction was stirred at 90°C overnight and then evaporated. The residue was diluted with brine (200 mL) and  $\text{H}_2\text{O}$  (100 mL) and extracted using EtOAc (2×150 mL). The combined organic layers were dried over  $\text{MgSO}_4$ , filtered and evaporated. The crude product was dissolved in warm (60°C) EtOAc (50 mL) and filtered.  $\text{Et}_2\text{O}$  (100 mL) was carefully added (on the top of the EtOAc solution to form biphasic system) and the mixture was kept at r.t. overnight.

Crystals of **39** were separated (3.4 g, 31%).  $^1\text{H}$  NMR (400 MHz,  $d_6$ -DMSO)  $\delta$ = 8.34-8.33 (m, 1H), 4.17-4.12 (m, 2H), 2.95-2.93 (m, 1H), 2.75-2.70 (m, 2H), 2.40-2.39 (m, 3H).  $^{13}\text{C}$  NMR (100 MHz,  $d_6$ -DMSO)  $\delta$ = 145.2, 145.1, 122.0, 80.4, 73.5, 44.7, 19.5, 12.6. ESI MS (MeOH) for  $[\text{M}+\text{Na}]^+ = 180.3$  Da.

### Synthesis of alkynes 125-126

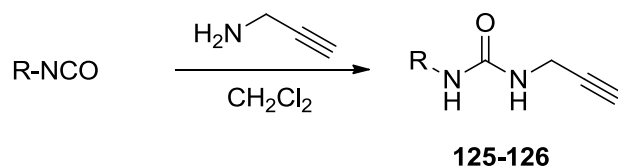

**Scheme 17.** General procedure for the synthesis of alkynes **125-126**.

**General procedure:** To a cooled ( $-25^\circ\text{C}$ ) solution of an appropriate isocyanate (6.2 mmol) in anhydrous  $\text{CH}_2\text{Cl}_2$  (20 mL), propargylamine (0.39 mL, 340 mg, 6.2 mmol) in anhydrous  $\text{CH}_2\text{Cl}_2$  (20 mL) was added dropwise. The reaction mixture was stirred at r.t. for 30 min and the product was filtered off, washed with small amount of  $\text{CH}_2\text{Cl}_2$  and  $\text{Et}_2\text{O}$ .

### Synthesis of alkynes 127-129

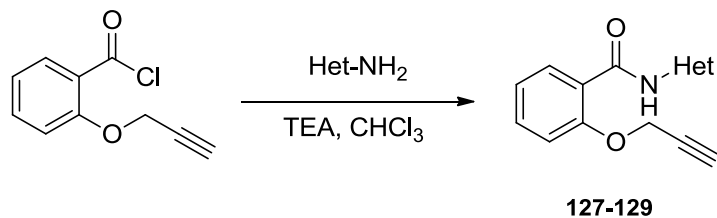

**Scheme 18.** General procedure for the synthesis of alkynes **127-129**.

**General procedure:** To a cooled (0°C) mixture of an appropriate Het-NH<sub>2</sub> (77 mmol) in CHCl<sub>3</sub> (100 mL), the acid chloride (20) (15 g, 77 mmol) in CHCl<sub>3</sub> (50 mL) was added. The reaction was stirred under reflux for one day and then cooled down and washed with H<sub>2</sub>O (200 mL). The organic layer was dried over MgSO<sub>4</sub>, filtered and evaporated, and the residue was purified by column chromatography (silica-gel, EtOAc).

### Synthesis of alkyne 133

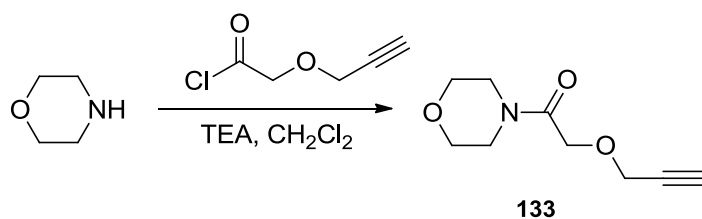

**Scheme 19.** Synthesis of alkyne 133.

**1-Morpholino-2-(prop-2-ynoxy)ethanone (133).** The title compound was obtained using the acid chloride (21) and general procedure as for alkynes 105-106.

### Synthesis of alkyne 134

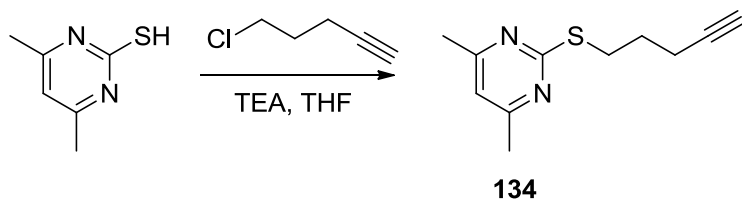

**Scheme 20.** Synthesis of alkyne 134.

**4,6-Dimethyl-2-(pent-4-ynylthio)pyrimidine (134).** The title compound was obtained using literature conditions for a similar compound (22).

## Synthesis of alkyne 136

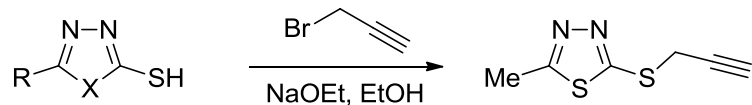

**Scheme 21.** General procedure for the synthesis of alkyne **136**.

**General procedure:** Alkyne **136** was obtained using literature conditions for a similar compound (23).

## 1.4 List and synthesis of alkynes for triazole compounds in test set

### 1.4.1. List of alkynes 201-247

The following alkynes were used to synthesize test set compounds. Of these, alkynes **201-223** were newly synthesized, while alkynes **224-247** were obtained commercially.

| Synthesized Alkynes (201-223) |                   |                   |
|-------------------------------|-------------------|-------------------|
| <p><b>201</b></p>             | <p><b>202</b></p> | <p><b>203</b></p> |
| <p><b>204</b></p>             | <p><b>205</b></p> | <p><b>206</b></p> |

|                                                                                                       |                                                                                                       |                                                                                                         |
|-------------------------------------------------------------------------------------------------------|-------------------------------------------------------------------------------------------------------|---------------------------------------------------------------------------------------------------------|
| 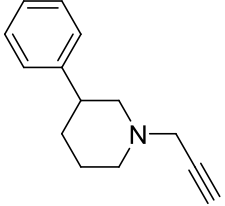 <p><b>207</b></p>   |  <p><b>208</b></p>   |  <p><b>209</b></p>   |
|  <p><b>210</b></p>   |  <p><b>211</b></p>   |  <p><b>212</b></p>   |
|  <p><b>213</b></p>   |  <p><b>214</b></p>   |  <p><b>215</b></p>  |
|  <p><b>216</b></p> |  <p><b>217</b></p> |  <p><b>218</b></p> |
|  <p><b>219</b></p> |  <p><b>220</b></p> |  <p><b>221</b></p> |



|                                                                                                       |                                                                                                       |                                                                                                         |
|-------------------------------------------------------------------------------------------------------|-------------------------------------------------------------------------------------------------------|---------------------------------------------------------------------------------------------------------|
| 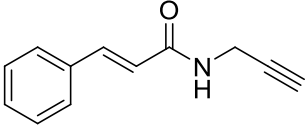 <p><b>222</b></p>   |  <p><b>223</b></p>   |                                                                                                         |
| <p><b>Commercially available alkynes (224-247)</b></p>                                                |                                                                                                       |                                                                                                         |
|  <p><b>224</b></p>   |  <p><b>225</b></p>   |  <p><b>226</b></p>   |
|  <p><b>227</b></p> |  <p><b>228</b></p> |  <p><b>229</b></p> |
|  <p><b>230</b></p> |  <p><b>231</b></p> |  <p><b>232</b></p> |
|  <p><b>233</b></p> |  <p><b>234</b></p> |  <p><b>235</b></p> |

|                                                                                                  |                                                                                                  |                                                                                                    |
|--------------------------------------------------------------------------------------------------|--------------------------------------------------------------------------------------------------|----------------------------------------------------------------------------------------------------|
| 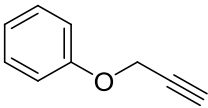<br><b>236</b>  | <br><b>237</b>  | <br><b>238</b>  |
| <br><b>239</b>  | <br><b>240</b>  | <br><b>241</b>  |
| <br><b>242</b>  | <br><b>243</b>  | <br><b>244</b>  |
| <br><b>245</b> | <br><b>246</b> | <br><b>247</b> |

#### 1.4.2. Synthesis of alkynes 201-223

Alkynes **206** (24), **208** (25), **211** (26), **212** (27), **213** (28), **219** (29), and **222** (11) were synthesized according to literature procedures. Alkynes **210** and **220** were described before but without general synthetic procedures (15).

**Synthesis of alkynes 201-204.** The compounds were obtained using **Scheme 7** and the general procedure as for alkynes **101-104**, **108**.

**Synthesis of alkyne 205.** The compound was obtained using **Scheme 10** and the general procedure as for alkynes **109-111**.

**Synthesis of alkyne 207.** The compound was obtained using **Scheme 11** and the general procedure as for alkynes **112-115**.

**Synthesis of alkynes 209, 220-221.** The compounds were obtained using **Scheme 12** and the general procedure as for alkynes **130, 132**.

**Synthesis of alkyne 210.** The compounds were obtained using **Scheme 13** (X=CH, Y=N). To 4-hydroxyquinazoline (20 g, 137 mmol) in anhydrous DMF (270 mL), NaOEt (21% w/w solution in EtOH, 51 mL, 137 mmol) was added. After 15 min, propargyl bromide (80% solution in toluene, 14.8 mL, 20.4 g, 137 mmol) was added and the reaction mixture was stirred at r.t. for 2 days. After evaporation, the residue was stirred with hot H<sub>2</sub>O (3 L), cooled and the product was filtered (87%).

#### Synthesis of alkyne 214

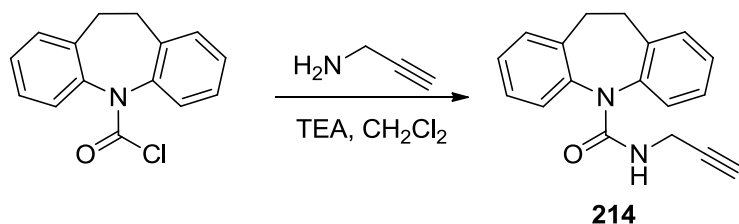

**Scheme 22.** Synthesis of alkyne **214**.

***N*-(Prop-2-ynyl)-10,11-dihydro-5*H*-dibenzo[*b,f*]azepine-5-carboxamide (214).** To a cold (0°C) solution of the acid chloride (5 g, 19.4 mmol) in CH<sub>2</sub>Cl<sub>2</sub> (100 mL), a mixture of propargyl amine (1.07 g, 19.4 mmol) and TEA (2.7 mL, 1.96 g, 19.4 mmol) in CH<sub>2</sub>Cl<sub>2</sub> (50 mL) was added dropwise. After addition the reaction was stirred under reflux for one day, cooled and washed with H<sub>2</sub>O (100 mL). The organic layer was separated, dried over MgSO<sub>4</sub>, filtered and evaporated. The residue was washed with Et<sub>2</sub>O and then hexanes (4.1 g, 76%).

### Synthesis of alkyne 215

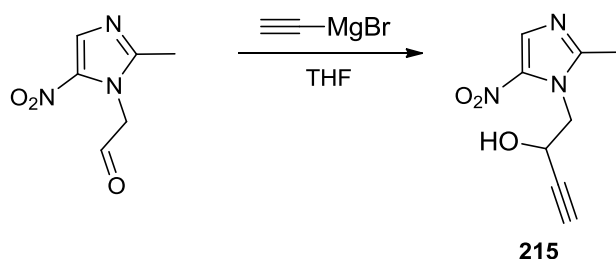

**Scheme 23.** The synthesis of alkyne **215**.

**1-(2-Methyl-5-nitro-1*H*-imidazol-1-yl)but-3-yn-2-ol (215).** A mixture of the aldehyde (30) (3.7 g, 21.9 mmol) in anhydrous THF (150 mL) was cooled to −70°C. A solution of ethynylmagnesium bromide (0.5 M in THF, 109 mL, 54.5 mmol, 2.5 equiv.) was added dropwise while maintaining the reaction temperature at −60°C (the aldehyde was obtained in the hydrate form, and therefore an excess of ethynylmagnesium bromide was used). After addition, the reaction was stirred at −60°C for 1.5 h and then slowly warmed up to r.t. and stirred for 2 h. The reaction was quenched with brine+H<sub>2</sub>O (100+50 mL), filtered through Celite and washed with EtOAc. The filtrate was transferred to separatory funnel and the organic layer was collected. The aqueous layer was extracted using EtOAc (100 mL). The combined organic fractions were dried

over  $\text{MgSO}_4$ , filtered and evaporated. The residue was purified by column chromatography (silica-gel, EtOAc) (2.7 g, 63%).  $^1\text{H}$  NMR (400 MHz,  $\text{CDCl}_3$ )  $\delta$ = 7.76 (s, 1H), 4.70-4.66 (m, 1H), 4.57-4.52 (m, 1H), 4.41-4.36 (m, 1H), 2.53 (d,  $J$ =2.0 Hz, 1H), 2.47 (s, 3H).  $^{13}\text{C}$  NMR (100 MHz,  $\text{CDCl}_3$ )  $\delta$ = 151.8, 138.2, 131.8, 81.2, 75.0, 60.3, 50.9, 14.4. ESI MS (MeOH) for  $[\text{M}+\text{H}]^+$  = 196.2 Da.

**Synthesis of alkynes 216-217** The compounds were obtained using **Scheme 19** and the general procedure as for alkynes **125-126**.

#### Synthesis of alkyne 218

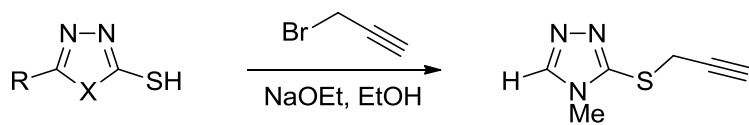

**Scheme 24** General procedure for the synthesis of alkyne **218**.

**General procedure:** Alkyne **218** was obtained using literature conditions for a similar compound (23).

#### Synthesis of alkyne 223

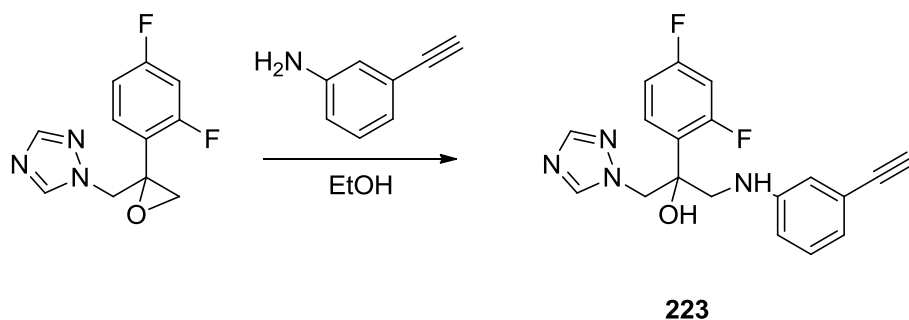

**Scheme 25.** Synthesis of alkyne **223**.

## 2-(2,4-Difluorophenyl)-1-(3-ethynylphenylamino)-3-(1*H*-1,2,4-triazol-1-yl)propan-2-ol

(223). The title compound was obtained using the literature conditions for a similar compound (31).

### 1.5. “Click Chemistry” reaction

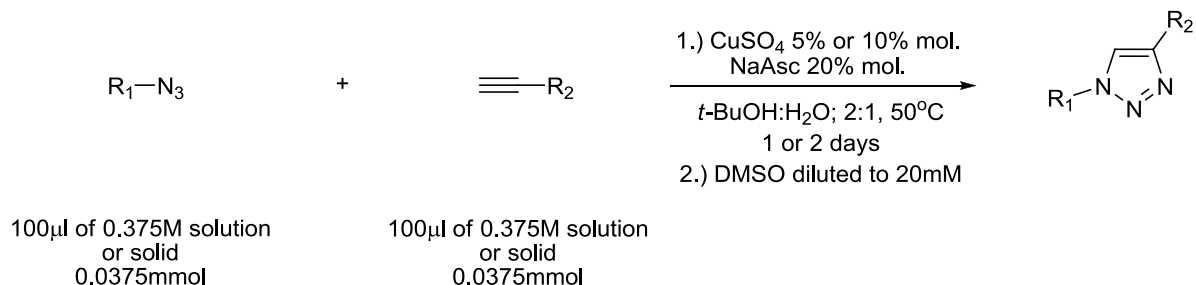

**Scheme 26.** General procedure for the click chemistry-mediated synthesis of 5-NI compounds.

**General procedure:** A 4 mL vial containing a stirring bar was charged with the azide (100 μL of 0.375M) and alkyne (100 μL of 0.375M). Solutions were made in *t*-BuOH : H<sub>2</sub>O; 2:1. In case the azide was not-soluble in the solvent system, solid substrate was added followed by 100 μl of *t*-BuOH : H<sub>2</sub>O; 2:1. If the alkyne was not-soluble in the solvent system, solid substrate was added followed by 100 μl of *t*-BuOH : H<sub>2</sub>O; 2:1. Subsequently, sodium ascorbate (156 μL of 0.048 M) and CuSO<sub>4</sub> (19 μL or 38 μL of 0.1 M in H<sub>2</sub>O) were added, giving concentrations of 100 mM each for azide and alkyne, 20 mM sodium ascorbate, 5 or 10 mM CuSO<sub>4</sub>, 63.3% *t*-BuOH, and 36.7% H<sub>2</sub>O. The reaction was carried out at 50°C for 1-2 days. If alkynes reacted slower, the reaction was carried out for 2 days at 50°C using twice the amount of CuSO<sub>4</sub> (38 μl of 0.1 M in H<sub>2</sub>O). The reaction mixture was diluted with DMSO (1.5 mL) and used directly in the biological assays. Final concentrations in reaction mixtures: 20 mM 1,2,3-triazole product, 4 mM sodium ascorbate, 1 or 2 mM CuSO<sub>4</sub>, 80% DMSO, 12.7% *t*-BuOH, and 7.3% H<sub>2</sub>O.

## 1.6. Synthesis of compounds for in vivo testing

**General procedure:** To a mixture of azide (2 mmol) and alkyne (2 mmol) in *t*-BuOH:H<sub>2</sub>O (2:1, 10 mL), sodium ascorbate (158 mg, 0.8 mmol, 40% mol.) was added and the mixture was stirred at r.t. for 5 min. A 1 M solution of CuSO<sub>4</sub> (200  $\mu$ L, 0.2 mmol, 10% mol.) was added and the reaction was carried out at 60°C for 1-3 days. After evaporation, the residue was purified by column chromatography (silica-gel, EtOAc or CHCl<sub>3</sub>:MeOH, 9:1 or EtOAc:MeOH, 9:1).

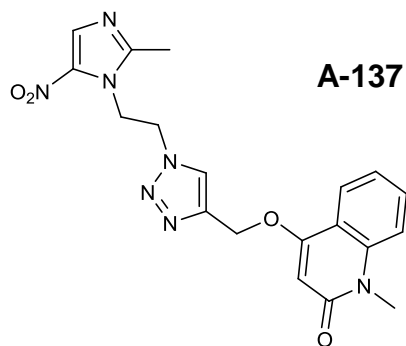

### 1-Methyl-4-((1-(2-(2-methyl-5-nitro-1H-imidazol-1-yl)ethyl)-1H-1,2,3-triazol-4-

yl)methoxy)quinolin-2(1H)-one (A-137). The title compound was prepared according to the general procedure (1 day) and purified by column chromatography (silica-gel, CHCl<sub>3</sub>:MeOH, 9:1) to give a white solid (93%), m.p. 212-213°C. <sup>1</sup>H NMR (500 MHz, d<sub>6</sub>-DMSO)  $\delta$ = 8.22 (s, 1H), 8.03 (s, 1H), 7.79 (d, *J*=7.9 Hz, 1H), 7.64 (t, *J*=7.8 Hz, 1H), 7.50 (d, *J*=8.6 Hz, 1H), 7.24 (t, *J*=7.5 Hz, 1H), 6.23 (s, 1H), 5.30 (s, 2H), 4.89 (t, *J*=5.3 Hz, 2H), 4.74 (t, *J*=5.2 Hz, 2H), 3.56 (s, 3H), 1.85 (s, 3H). <sup>13</sup>C NMR (125 MHz, d<sub>6</sub>-DMSO)  $\delta$ = 162.2, 160.3, 151.2, 142.0, 139.5, 138.4, 133.2, 131.5, 125.8, 122.6, 121.5, 115.4, 114.6, 97.5, 61.7, 48.9, 46.2, 28.6, 12.8. HRMS calcd for C<sub>19</sub>H<sub>20</sub>N<sub>7</sub>O<sub>4</sub> *m/z* 410.1571, meas 410.1571. IR (cm<sup>-1</sup>): 3130 (m), 1639 (s), 1459 (s), 1236 (s), 763 (s).

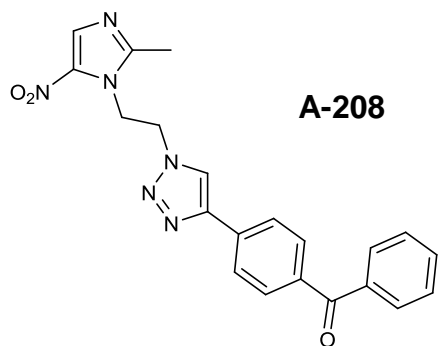

**(4-(1-(2-(2-Methyl-5-nitro-1H-imidazol-1-yl)ethyl)-1H-1,2,3-triazol-4-**

**yl)phenyl)(phenyl)methanone (A-208).** The title compound was prepared according to the general procedure (2 days) and purified by column chromatography (silica-gel, EtOAc) to give a white solid (75%), m.p. 174-176°C. <sup>1</sup>H NMR (500 MHz, d<sub>6</sub>-DMSO) δ= 8.63 (s, 1H), 8.07 (s, 1H), 7.96 (d, *J*=8.0 Hz, 2H), 7.83 (d, *J*=8.0 Hz, 2H), 7.77 (d, *J*=8.0 Hz, 2H), 7.69 (t, *J*=7.4 Hz, 1H), 7.58 (t, *J*=7.5 Hz, 2H), 4.92 (t, *J*=5.3 Hz, 2H), 4.79 (t, *J*=5.3 Hz, 2H), 1.95 (s, 3H). <sup>13</sup>C NMR (125 MHz, d<sub>6</sub>-DMSO) δ= 195.1, 151.2, 145.6, 138.4, 137.1, 136.2, 134.3, 133.3, 132.6, 130.6, 129.5, 128.6, 125.0, 123.5, 49.0, 46.0, 12.9. HRMS calcd for C<sub>21</sub>H<sub>19</sub>N<sub>6</sub>O<sub>3</sub> *m/z* 403.1513, meas 403.1515. IR (cm<sup>-1</sup>): 3120 (m), 2925 (m), 2852 (m), 1661 (s), 1611 (m), 1452 (s), 1358 (s), 1257 (s), 1200 (s), 1147 (s), 823 (s), 700 (s).

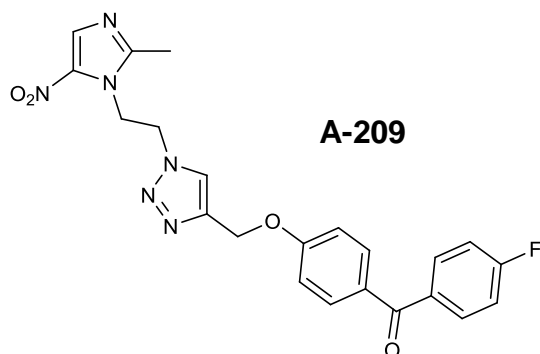

**(4-Fluorophenyl)(4-((1-(2-(2-methyl-5-nitro-1H-imidazol-1-yl)ethyl)-1H-1,2,3-triazol-4-**

**yl)methoxy)phenyl)methanone (A-209).** The title compound was prepared according to the



general procedure (2 days) and purified by column chromatography (silica-gel, EtOAc) to give a white solid (78%), m.p. 146-148°C.  $^1\text{H}$  NMR (500 MHz,  $d_6$ -DMSO)  $\delta$ = 8.16 (s, 1H), 8.04 (s, 1H), 7.79 (dd,  $J$ =8.5, 5.6 Hz, 2H), 7.73 (d,  $J$ =8.8 Hz, 2H), 7.38 (t,  $J$ =8.9 Hz, 2H), 7.16 (d,  $J$ =8.6 Hz, 2H), 5.27 (s, 2H), 4.86 (t,  $J$ =5.3 Hz, 2H), 4.72 (t,  $J$ =5.4 Hz, 2H), 1.79 (s, 3H).  $^{13}\text{C}$  NMR (125 MHz,  $d_6$ -DMSO)  $\delta$ = 193.1, 164.3 ( $J$ =250.5 Hz), 161.5, 151.2, 142.5, 138.3, 134.2 ( $J$ =2.9 Hz), 133.2, 132.2 ( $J$ =9.0 Hz), 132.0, 129.6, 125.6, 115.5 ( $J$ =22.0 Hz), 114.7, 61.1, 48.8, 46.1, 12.7. HRMS calcd for  $\text{C}_{22}\text{H}_{20}\text{FN}_6\text{O}_4$   $m/z$  451.1525, meas 451.1545. IR ( $\text{cm}^{-1}$ ): 3131 (m), 1641 (s), 1601 (s), 1458 (s), 1248 (s), 1148 (s), 730 (s).

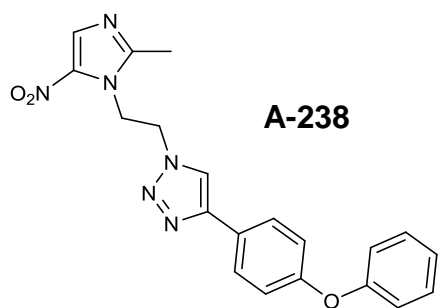

**1-(2-(2-Methyl-5-nitro-1H-imidazol-1-yl)ethyl)-4-(4-phenoxyphenyl)-1H-1,2,3-triazole (A-238).** The title compound was prepared according to the general procedure (2 days) and purified by column chromatography (silica-gel, EtOAc) to give a yellowish solid (90%), m.p. 178-179°C.  $^1\text{H}$  NMR (500 MHz,  $d_6$ -DMSO)  $\delta$ = 8.39 (s, 1H), 8.06 (s, 1H), 7.76 (d,  $J$ =8.1 Hz, 2H), 7.41 (t,  $J$ =7.7 Hz, 2H), 7.16 (t,  $J$ =7.5 Hz, 1H), 7.06 (t,  $J$ =7.0 Hz, 4H), 4.88 (t,  $J$ =5.5 Hz, 2H), 4.77 (t,  $J$ =5.4, 2H), 1.92 (s, 3H).  $^{13}\text{C}$  NMR (125 MHz,  $d_6$ -DMSO)  $\delta$ = 156.5, 156.4, 151.2, 146.1, 138.4, 133.3, 130.1, 126.9, 125.7, 123.6, 121.8, 118.9, 118.8, 48.9, 46.1, 12.9. HRMS calcd for  $\text{C}_{21}\text{H}_{18}\text{N}_6\text{O}_3$   $m/z$  391.1513, meas 391.1501. IR ( $\text{cm}^{-1}$ ): 3148 (m), 3070 (m), 1589 (m), 1558 (w), 1526 (m), 1460 (s), 1365 (s), 1260 (s), 1185 (s), 749 (s).

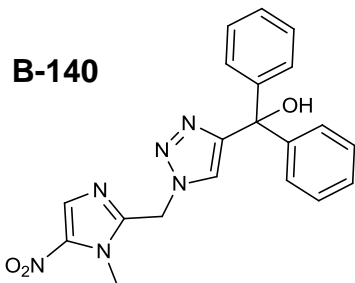

**(1-((1-Methyl-5-nitro-1H-imidazol-2-yl)methyl)-1H-1,2,3-triazol-4-yl)diphenylmethanol (B-140).** The title compound was prepared according to the general procedure (1 day) and purified by column chromatography (silica-gel, EtOAc:MeOH, 9:1) to give a white solid (87%), m.p. 189-191°C. <sup>1</sup>H NMR (500 MHz, d<sub>6</sub>-DMSO) δ= 8.06 (s, 1H), 7.93 (s, 1H), 7.37 (d, *J*=7.9 Hz, 4H), 7.29 (t, *J*=7.6 Hz, 4H), 7.22 (t, *J*=7.3 Hz, 2H), 6.60 (s, 1H), 5.90 (s, 2H), 3.96 (s, 3H). <sup>13</sup>C NMR (125 MHz, d<sub>6</sub>-DMSO) δ= 154.1, 146.9, 139.5, 131.9, 127.5, 127.0, 126.7, 124.1, 75.6, 45.3, 33.5. HRMS calcd for C<sub>20</sub>H<sub>19</sub>N<sub>6</sub>O<sub>3</sub> *m/z* 391.1513, meas 391.1531. IR (cm<sup>-1</sup>): 3277 (m), 3157 (m), 2984 (w), 2941 (w), 1597 (w), 1527 (w), 1467 (s), 1371 (s), 1180 (s), 1050 (s), 743 (s).

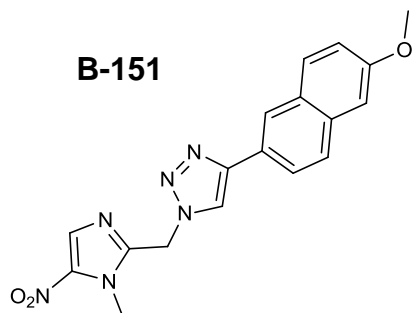

**4-(6-Methoxynaphthalen-2-yl)-1-((1-methyl-5-nitro-1H-imidazol-2-yl)methyl)-1H-1,2,3-triazole (B-151).** The title compound was prepared according to the general procedure (1 day) and purified by column chromatography (silica-gel, CHCl<sub>3</sub>:MeOH, 9:1) to give a yellowish solid (58%), m.p. 188-189°C. <sup>1</sup>H NMR (500 MHz, d<sub>6</sub>-DMSO) δ= 8.66 (s, 1H), 8.34 (s, 1H), 8.10 (s, 1H), 7.96 (dd, *J*=8.5, 1.2 Hz, 1H), 7.88 (d, *J*=9.1 Hz, 2H), 7.34 (d, *J*=2.3 Hz, 1H), 7.19 (dd,

$J=8.9, 2.4$  Hz, 1H), 5.99 (s, 2H), 4.01 (s, 3H), 3.88 (s, 3H).  $^{13}\text{C}$  NMR (125 MHz,  $\text{d}_6\text{-DMSO}$ )  $\delta=$  157.5, 146.9, 146.7, 139.6, 133.9, 131.9, 129.5, 128.5, 127.4, 125.6, 124.1, 123.6, 122.0, 119.1, 106.0, 55.2, 45.8, 33.6. HRMS calcd for  $\text{C}_{18}\text{H}_{17}\text{N}_6\text{O}_3$   $m/z$  365.1357, meas 365.1364. IR ( $\text{cm}^{-1}$ ): 3106 (m), 2971 (m), 2843 (m), 1610 (w), 1529 (s), 1468 (s), 1370 (s), 1261 (s), 1218 (s), 1021 (s), 862 (s), 827 (s).

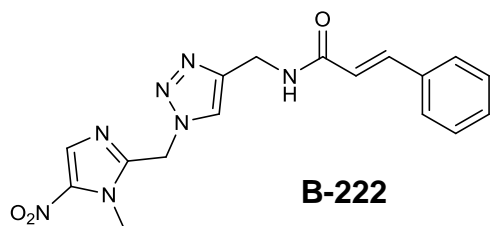

***N*-((1-((1-Methyl-5-nitro-1*H*-imidazol-2-yl)methyl)-1*H*-1,2,3-triazol-4-**

**yl)methyl)cinnamamide (B-222).** The title compound was prepared according to the general procedure (2 days) and purified by column chromatography (silica-gel, EtOAc:MeOH, 9:1) to give a white solid (71%), m.p. 160-162°C  $^1\text{H}$  NMR (500 MHz,  $\text{d}_6\text{-DMSO}$ )  $\delta=$  8.64 (t,  $J=5.6$  Hz, 1H), 8.05 (s, 2H), 7.55 (d,  $J=7.7$  Hz, 2H), 7.50-7.31 (m, 3H), 6.67 (d,  $J=15.7$  Hz, 1H), 5.89 (s, 2H), 4.44 (d,  $J=5.8$  Hz, 2H), 3.96 (s, 3H), NH broadened and missing in DMSO.  $^{13}\text{C}$  NMR (125 MHz,  $\text{d}_6\text{-DMSO}$ )  $\delta=$  165.0, 147.0, 145.0, 139.5, 139.0, 134.8, 131.8, 129.5, 128.9, 127.5, 123.8, 121.8, 45.4, 34.2, 33.5. HRMS calcd for  $\text{C}_{17}\text{H}_{18}\text{N}_7\text{O}_3$   $m/z$  368.1466, meas 368.1455. IR ( $\text{cm}^{-1}$ ): 3231 (m), 3140 (m), 3046 (m), 2961 (m), 1650 (s), 1535 (s), 1445 (s), 1372 (s), 1052 (s), 825 (s).

**C-153**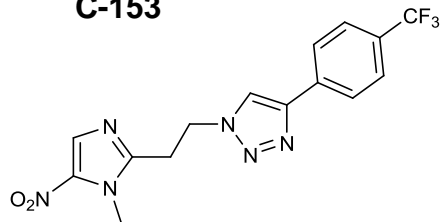

**1-(2-(1-methyl-5-nitro-1H-imidazol-2-yl)ethyl)-4-(4-(trifluoromethyl)phenyl)-1H-1,2,3-triazole (C-153).** The title compound was prepared according to the general procedure (1 day) and purified by column chromatography (silica-gel, EtOAc) to give a gray solid (70%), m.p. 137-141°C. <sup>1</sup>H NMR (500 MHz, d<sub>6</sub>-DMSO) δ= 8.76 (s, 1H), 8.04 (d, *J*=7.2 Hz, 3H), 7.81 (d, *J*=8.3, 2H), 4.88 (t, *J*=6.8 Hz, 2H), 3.83 (s, 3H), 3.46 (t, *J*=6.9 Hz, 2H). <sup>13</sup>C NMR (125 MHz, d<sub>6</sub>-DMSO) δ= 151.1, 145.7, 140.0, 135.5, 133.0, 129.0 (*J*=3.9 Hz), 126.8 (*J*=3.8 Hz), 126.5, 125.1 (*J*=271.9 Hz), 124.0, 47.5, 33.8, 28.3. HRMS calcd for C<sub>15</sub>H<sub>14</sub>F<sub>3</sub>N<sub>6</sub>O<sub>2</sub> *m/z* 367.1125, meas 367.1131. IR (cm<sup>-1</sup>): 3135 (m), 1621 (m), 1527 (m), 1465 (m), 1326 (s), 1264 (s), 1185 (s), 1159 (s), 1115 (s), 1064 (s), 812 (s).

**C-237**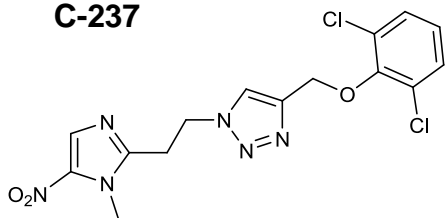

**4-((2,6-Dichlorophenoxy)methyl)-1-(2-(1-methyl-5-nitro-1H-imidazol-2-yl)ethyl)-1H-1,2,3-triazole (C-237).** The title compound was prepared according to the general procedure (1 day) and purified by column chromatography (silica-gel, CHCl<sub>3</sub>:MeOH, 9:1) to give a white solid (82%), m.p. 125-126°C. <sup>1</sup>H NMR (500 MHz, d<sub>6</sub>-DMSO) δ= 8.30 (s, 1H), 8.04 (s, 1H), 7.48 (d, *J*=8.0 Hz, 2H), 7.19 (t, *J*=8.4 Hz, 1H), 5.20 (s, 2H), 4.83 (t, *J*=7.0 Hz, 2H), 3.79 (s, 3H), 3.42 (t, *J*=7.0 Hz, 2H). <sup>13</sup>C NMR (125 MHz, d<sub>6</sub>-DMSO) δ= 150.3, 150.1, 141.9, 139.1, 132.1, 129.3,

128.8, 126.3, 125.4, 66.0, 46.5, 32.9, 27.5. HRMS calcd for C<sub>15</sub>H<sub>14</sub>Cl<sub>2</sub>N<sub>6</sub>O<sub>3</sub> *m/z* 397.0577, meas 397.0560. IR (cm<sup>-1</sup>): 3135 (m), 3080 (m), 2952 (m), 1566 (w), 1528 (s), 1465 (s), 1446 (s), 1438(s), 1373 (s), 1186 (s), 968 (s).

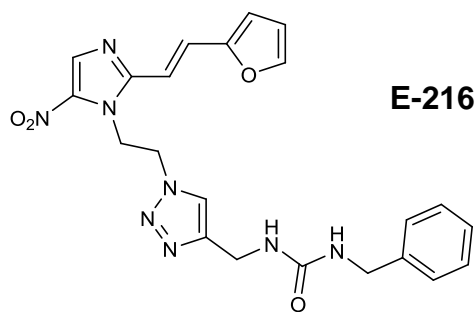

**(E)-1-Benzyl-3-((1-(2-(2-(2-(furan-2-yl)vinyl)-5-nitro-1H-imidazol-1-yl)ethyl)-1H-1,2,3-triazol-4-yl)methyl)urea (E-216).** The title compound was prepared according to the general procedure (1 day) and purified by column chromatography (silica-gel, CHCl<sub>3</sub>:MeOH, 9:1) to give an orange solid (75%), m.p. 153-156°C. <sup>1</sup>H NMR (500 MHz, d<sub>6</sub>-DMSO) δ= 8.22 (s, 1H), 7.88 (s, 1H), 7.82 (s, 1H), 7.40 (d, *J*=15.4 Hz, 1H), 7.30 (t, *J*=7.6 Hz, 2H), 7.25-7.19 (m, 3H), 6.82 (d, *J*=3.4 Hz, 1H), 6.62 (dd, *J*=3.4, 1.7 Hz, 1H), 6.39 (t, *J*=5.9 Hz, 1H), 6.35 (d, *J*=15.4 Hz, 1H), 6.26 (t, *J*=5.7 Hz, 1H), 4.91 (t, *J*=5.6 Hz, 2H), 4.79 (t, *J*=5.3 Hz, 2H), 4.19 (d, *J*=5.8 Hz, 2H), 4.05 (d, *J*=5.7 Hz, 2H). <sup>13</sup>C NMR (125 MHz, d<sub>6</sub>-DMSO) δ= 157.7, 151.3, 150.0, 146.2, 145.0, 140.7, 138.5, 135.1, 128.2, 127.0, 126.5, 125.2, 123.3, 113.7, 112.7, 109.3, 48.9, 45.2, 42.9, 34.8. HRMS calcd for C<sub>22</sub>H<sub>23</sub>N<sub>8</sub>O<sub>4</sub> *m/z* 463.1837, meas 463.1858. IR (cm<sup>-1</sup>): 3091 (m), 3029 (m), 1629 (m), 1367 (s), 1200 (s), 741 (s).

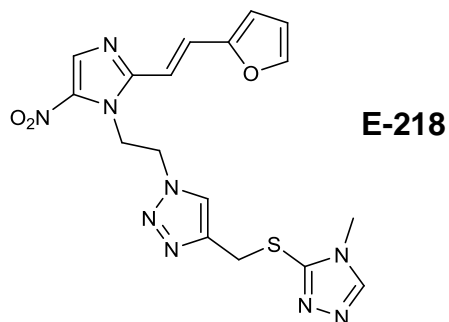

**(E)-1-(2-(2-(2-(Furan-2-yl)vinyl)-5-nitro-1H-imidazol-1-yl)ethyl)-4-((4-methyl-4H-1,2,4-triazol-3-ylthio)methyl)-1H-1,2,3-triazole (E-218).** The title compound was prepared according to the general procedure (1 day) and purified by column chromatography (silica-gel, CHCl<sub>3</sub>:MeOH, 9:1) to give an orange solid (74%), m.p. 184-186°C. <sup>1</sup>H NMR (500 MHz, d<sub>6</sub>-DMSO) δ= 8.52 (s, 1H), 8.19 (s, 1H), 7.94 (s, 1H), 7.81 (s, 1H), 7.37 (d, *J*=15.5 Hz, 1H), 6.81 (d, *J*=3.3 Hz, 1H), 6.62 (dd, *J*=3.3, 1.7 Hz, 1H), 6.31 (d, *J*=15.6 Hz, 1H), 4.89 (t, *J*=5.3 Hz, 2H), 4.79 (t, *J*=5.3 Hz, 2H), 4.29 (s, 2H), 3.42 (s, 3H). <sup>13</sup>C NMR (125 MHz, d<sub>6</sub>-DMSO) δ= 151.4, 150.0, 148.5, 146.1, 144.9, 142.8, 138.4, 135.1, 125.2, 124.4, 113.7, 112.7, 109.1, 49.0, 45.2, 30.6, 27.2. HRMS calcd for C<sub>17</sub>H<sub>18</sub>N<sub>9</sub>O<sub>3</sub>S *m/z* 428.1248, meas 428.1264. IR (cm<sup>-1</sup>): 3091 (m), 3028 (m), 1629 (m), 1420 (s), 1367 (s), 1256 (s), 1190 (s), 931 (s), 741 (s).

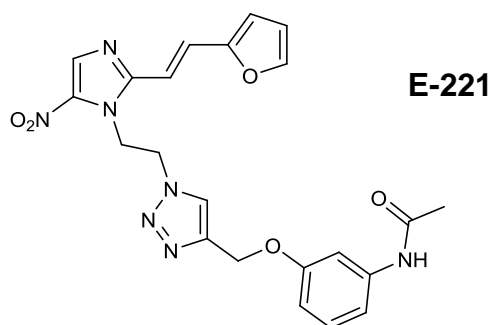

**(E)-N-(3-((1-(2-(2-(2-(Furan-2-yl)vinyl)-5-nitro-1H-imidazol-1-yl)ethyl)-1H-1,2,3-triazol-4-yl)methoxy)phenyl)acetamide (E-221).** The title compound was prepared according to the

general procedure (1 day) and purified by column chromatography (silica-gel, CHCl<sub>3</sub>:MeOH, 9:1) to give a yellow solid (77%), m.p. 151-153°C. <sup>1</sup>H NMR (500 MHz, d<sub>6</sub>-DMSO) δ= 9.89 (s, 1H), 8.22 (s, 1H), 8.14 (s, 1H), 7.80 (s, 1H), 7.37 (d, *J*=15.4 Hz, 1H), 7.29 (s, 1H), 7.16 (t, *J*=8.1 Hz, 1H), 7.08 (d, *J*=8.0 Hz, 1H), 6.81 (d, *J*=3.3 Hz, 1H), 6.62-6.57 (m, 2 H), 6.35 (d, *J*=15.2 Hz, 1H), 4.94 (t, *J*=5.3 Hz, 2H), 4.85 (s, 2H), 4.84 (t, *J*=5.2 Hz, 2H), 2.03 (s, 3H). <sup>13</sup>C NMR (125 MHz, d<sub>6</sub>-DMSO) δ= 158.1, 151.3, 150.1, 144.9, 143.0, 140.4, 138.4, 135.1, 129.4, 125.2, 125.1, 113.7, 112.7, 111.7, 109.2, 108.7, 105.8, 99.1, 60.8, 49.1, 45.2, 24.0. HRMS calcd for C<sub>22</sub>H<sub>22</sub>N<sub>7</sub>O<sub>5</sub> *m/z* 464.1677, meas 464.1680. IR (cm<sup>-1</sup>): 3587 (m), 3302 (m), 3242 (m), 3109 (m), 1666 (s), 1600 (s), 1371 (s), 1260 (s), 1193 (s), 723 (s).

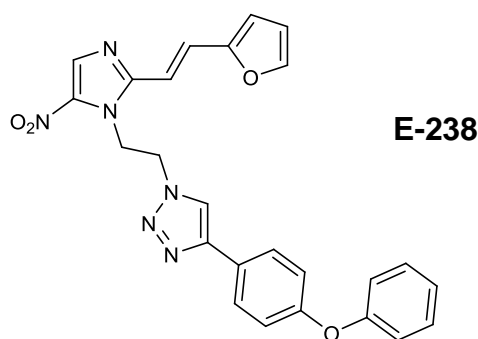

**(E)-1-(2-(2-(2-(Furan-2-yl)vinyl)-5-nitro-1H-imidazol-1-yl)ethyl)-4-(4-phenoxyphenyl)-1H-1,2,3-triazole (E-238).** The title compound was prepared according to the general procedure (3 days) and purified by column chromatography (silica-gel, CHCl<sub>3</sub>:MeOH, 9:1) to give a yellow solid (75%), m.p. 221-223°C. <sup>1</sup>H NMR (500 MHz, d<sub>6</sub>-DMSO) δ= 8.45 (s, 1H), 8.23 (s, 1H), 7.69 (s, 1H), 7.60 (d, *J*=8.2 Hz, 2H), 7.41 (t, *J*=7.6 Hz, 2H), 7.32 (d, *J*=15.4 Hz, 1H), 7.16 (t, *J*=7.4 Hz, 1H), 7.02 (d, *J*=8.0 Hz, 2H), 6.96 (d, *J*=8.0 Hz, 2H), 3.32 (d, *J*=3.2 Hz, 1H), 6.53 (d, *J*=1.6 Hz, 1H), 6.36 (d, *J*=15.4 Hz, 1H), 4.98 (t, *J*=5.0 Hz, 2H), 4.67 (t, *J*=5.0 Hz, 2H). <sup>13</sup>C NMR (125 MHz, d<sub>6</sub>-DMSO) δ= 156.5, 156.2, 151.2, 150.1, 146.2, 144.8, 138.5, 135.3, 130.1,

126.8, 125.9, 125.2, 123.5, 121.8, 118.9, 118.6, 113.7, 112.5, 109.0, 49.3, 45.3. HRMS calcd for  $C_{25}H_{21}N_6O_4$   $m/z$  469.1619, meas 469.1628. IR ( $cm^{-1}$ ): 3119 (m), 3096 (m), 1617 (m), 1522 (s), 1487 (s), 1447 (s), 1400 (s), 1294 (s), 1196 (s), 745 (s).

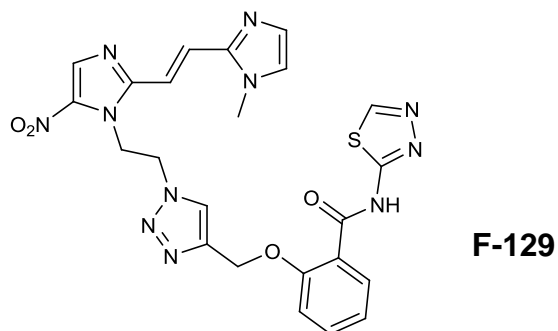

**(E)-2-((1-(2-(2-(2-(1-Methyl-1H-imidazol-2-yl)vinyl)-5-nitro-1H-imidazol-1-yl)ethyl)-1H-1,2,3-triazol-4-yl)methoxy)-N-(1,3,4-thiadiazol-2-yl)benzamide (F-129).** The title compound was prepared according to the general procedure (1 day) and purified by column chromatography (silica-gel,  $CHCl_3$ :MeOH, 9:1) to give a yellow solid (86%), m.p. 214-216°C.  $^1H$  NMR (500 MHz,  $d_6$ -DMSO)  $\delta$ = 9.24 (s, 1H), 8.25 (s, 1H), 8.23 (s, 1H), 7.80 (d,  $J$ =7.8 Hz, 1H), 7.58 (d,  $J$ =7.8 Hz, 1H), 7.41 (d,  $J$ =15.0 Hz, 1H), 7.25 (d,  $J$ =8.4 Hz, 1H), 7.12-7.21 (m, 2H), 6.91 (d,  $J$ =15.1 Hz, 1H), 6.41 (s, 1H), 5.06 (s, 2H), 5.02 (s, 2H), 4.83 (s, 2H), 3.68 (s, 3H), missing NH.  $^{13}C$  NMR (125 MHz,  $d_6$ -DMSO)  $\delta$ = 164.2, 156.0, 150.1, 149.1, 143.8, 143.2, 138.5, 135.1, 133.8, 130.6, 128.5, 124.2, 123.9, 122.8, 121.8, 121.3, 113.5, 113.2, 63.0, 49.5, 48.6, 45.5, 32.6. HRMS calcd for  $C_{23}H_{21}N_{11}O_4S$   $m/z$  548.1571, meas 548.1582. IR ( $cm^{-1}$ ): 3141 (m), 1664 (m), 1555 (m), 1451 (m), 1438 (m), 1421 (m), 1259 (s), 1195 (s), 1025 (s), 821 (s), 731 (s).



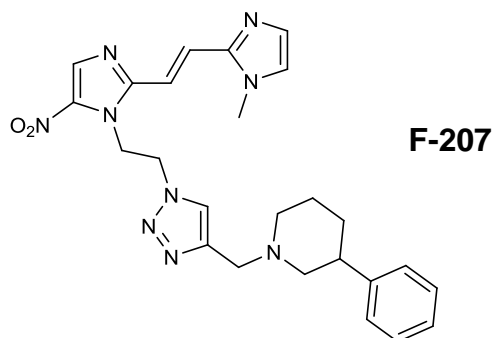

**(E)-1-((1-(2-(2-(2-(1-Methyl-1H-imidazol-2-yl)vinyl)-5-nitro-1H-imidazol-1-yl)ethyl)-1H-1,2,3-triazol-4-yl)methyl)-3-phenylpiperidine (F-207).** The title compound was prepared according to the general procedure (1 day) and purified by column chromatography (silica-gel, CHCl<sub>3</sub>:MeOH, 9:1) to give a yellow solid (69%), m.p. broadened decomposition. <sup>1</sup>H NMR (500 MHz, d<sub>6</sub>-DMSO) δ= 8.21 (s, 1H), 7.88 (s, 1H), 7.47 (d, *J*=15.1 Hz, 1H), 7.31-7.24 (m, 3H), 7.22-7.14 (m, 3H), 7.05 (d, *J*=7.0 Hz, 1H), 6.79 (d, *J*=15.1 Hz, 1H), 4.94 (t, *J*=4.8 Hz, 2H), 4.80 (t, *J*=5.0 Hz, 2H), 3.71 (s, 3H), 3.45-3.37 (m, 2H), 2.74 (d, *J*=10.3 Hz, 1H), 2.69-2.59 (m, 2H), 1.90 (t, *J*=10.8 Hz, 1H), 1.76 (t, *J*=10.9 Hz, 1H), 1.71 (d, *J*=12.3 Hz, 1H), 1.56-1.38 (m, 2H), 1.26 (ddd, *J*=12.3, 12.3, 4.0 Hz, 1H). <sup>13</sup>C NMR (125 MHz, d<sub>6</sub>-DMSO) δ= 149.8, 144.5, 143.3, 143.2, 138.6, 135.0, 129.3, 128.2, 127.1, 126.1, 124.4, 124.2, 123.8, 112.6, 59.9, 52.6, 52.0, 48.9, 45.3, 42.2, 32.6, 30.9, 25.1. HRMS calcd for C<sub>25</sub>H<sub>30</sub>N<sub>9</sub>O<sub>2</sub> *m/z* 488.2517, meas 488.2506. IR (cm<sup>-1</sup>): 3131 (m), 2929 (s), 1631 (m), 1519 (m), 1450 (s), 1400 (s), 1260 (s), 731 (s).

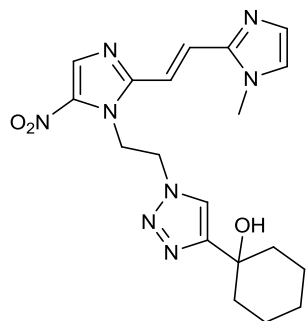

**F-230**

**(E)-1-(1-(2-(2-(2-(1-Methyl-1H-imidazol-2-yl)vinyl)-5-nitro-1H-imidazol-1-yl)ethyl)-1H-1,2,3-triazol-4-yl)cyclohexanol (F-230).** The title compound was prepared according to the general procedure (1 day) and purified by column chromatography (silica-gel, CHCl<sub>3</sub>:MeOH, 9:1) to give a yellow solid (63%), m.p. 229-230°C. <sup>1</sup>H NMR (500 MHz, d<sub>6</sub>-DMSO) δ= 8.24 (s, 1H), 7.87 (s, 1H), 7.47 (d, *J*=15.1 Hz, 1H), 7.28 (s, 1H), 7.04 (s, 1H), 6.64 (d, *J*=15.0 Hz, 1H), 4.91 (t, *J*=5.0 Hz, 2H), 4.82-4.77 (m, 3H), 3.71 (s, 3H), 1.67-1.35 (m, 7H), 1.31-1.18 (m, 2H), 1.15-1.00 (m, 1H). <sup>13</sup>C NMR (500 MHz, d<sub>6</sub>-DMSO) δ= 156.1, 149.8, 138.6, 135.0, 129.2, 124.2, 124.1, 123.6, 121.6, 112.7, 67.7, 48.8, 45.6, 37.4, 32.6, 25.1, 21.5. HRMS calcd for C<sub>19</sub>H<sub>25</sub>N<sub>8</sub>O<sub>3</sub> *m/z* 413.2044, meas 413.2041. IR (cm<sup>-1</sup>): 3240 (m), 3119 (m), 3098 (m), 2924 (m), 2852 (m), 1635 (m), 1518 (m), 1462 (s), 1369 (s), 1264 (s), 1194 (s), 1178 (s), 979 (s), 740 (s).

## 2. Biological methods and data analysis

### 2.1. Microbial strains

The following three Mz-sensitive isolates of *G. lamblia* were used: BRIS/87/HEPU/713 (713) (32), BRIS/83/HEPU/106 (106) (33), and GS/M (ATCC 50580). The Mz-resistant syngeneic lines, 713-M3 and 106-2ID10, were derived in the laboratory from isolates 713 and 106, respectively (32, 33). These lines show a stable 10- to 25-fold increase in EC<sub>50</sub> for Mz

compared to the parental lines (34). For *T. vaginalis*, we used the two Mz-sensitive clinical isolates, G3 (ATCC PRA-98) and BRIS/92/STD/L/F1623 (F1623) (35), and the two Mz-resistant clinical isolates, LA/03/CDC/1 (LA1) (36) and BRIS/92/STD/L/B7268 (B7268) (37). *Giardia* lines were grown in TYI-S-33 medium supplemented with 10% bovine serum and 1 mg/mL bovine bile (Sigma). *Trichomonas* lines were grown in TYM complete media (38). The *H. pylori* isolates SS1 and S. Africa R7 (CS22), and the  $\Delta frxA \Delta rdxA$  double-mutant strain of SS1 were described before (39, 40). *C. difficile* isolate (ATCC 9689) and *B. fragilis* (ATCC 25285) were obtained from ATCC. The bacterial strains were grown in BHI medium supplemented with 10% bovine fetal serum.

## 2.2. Antimicrobial assays

Antimicrobial assays were done as described before (34). Briefly, stocks of the test compounds (10 mM in DMSO) were diluted in PBS to 75  $\mu$ M, and 1:3 serial dilutions were made. Trophozoites were added to the wells in a 96-well plates. *Giardia* cultures were grown for two days and *Trichomonas* cultures for one day at 37°C under anaerobic conditions (AnaeroPack-Anaero system, Remel). For protozoa, cell growth and viability after incubation were determined with an ATP assay by adding BacTiter-Glo microbial cell viability assay reagent (Promega) and measuring ATP-dependent luminescence in a microplate reader. Bacterial cultures were grown for 1 day at 37°C under anaerobic conditions (AnaeroPack-Anaero system, Remel). Cell growth and viability were determined by optical density measurements at 600 nm. The 50% effective concentration (EC50) was derived from the concentration-response curves using BioAssay software (Cambridge soft). In preliminary studies, we confirmed that EC50 values showed good correlations with minimal inhibitory concentrations (MIC), as determined

microscopically with serial dilutions of test compounds and *Giardia* as a target microbe.

However, activity data are reported as EC50 in this study, because the values are more precise and allow better quantitative comparisons.

### **2.3. Cytotoxicity assay in mammalian cells**

The human epithelial cell line, HeLa (ATCC CCL-2), was used to determine drug cytotoxicity in human cells (34). Compounds were serially diluted (1:3) and added to HeLa cell cultures in 96-well plates. Cells were grown for 2 days, and viable cell numbers were determined using AlamarBlue reagent (Invitrogen). The 50% cytotoxic concentration (CC50) was derived from the concentration-response curves using BioAssay software (Cambridge soft).

### **2.4. Analysis of Quantitative Structure-Activity Relationship (QSAR)**

E-dragon 1.0 from Virtual Computational Chemistry Laboratory was used to calculate 1,666 chemical descriptors for each compound (41). Measured EC50 and chemical descriptor values were used as input attributes for Service Vector Machine calculations and decision tree analyses in WEKA machine learning software (42). To eliminate chemical descriptor redundancy, we used Selected Classifier (Evaluator: CfsubsetEval and search: BestFirst) function with SMO or J48 as classifiers in WEKA. The models were evaluated for significance by Chi-square test. Selected attributes were employed to generate chemical landscapes by Principal Component Analysis (XL-STAT). Graph-R software (version 2.29) was used to generate 3D contour graphs.

## **2.5. Murine *Giardia* infection model**

Adult C57BL/6 mice (Jackson Laboratory) were infected orally with  $10^7$  trophozoites of *G. lamblia* GS/M. After 2 days, mice were given five doses of test compound in 0.1% Hypromellose in PBS by oral gavage over a 3-day period. Controls received only 0.1 % Hypromellose/PBS. On day 5, the small intestine was removed, opened in 5 ml PBS, and chilled and shaken to release attached trophozoites. Live trophozoites were enumerated in a counting chamber. All animal studies were reviewed and approved by the UCSD Institutional Animal Care and Use Committee.

## **2.6. Assays of plasma drug levels**

Mice were given a single 30 mg/kg dose of test compound by oral gavage in 0.1% Hypromellose in PBS. After 2 h, blood samples were taken and centrifuged to collect plasma. A 200  $\mu$ l volume of plasma was mixed with 1 ml acetone, the mixture was centrifuged, and the supernatant was collected and dried at 50°C. After resuspension in 20  $\mu$ L complete TYI-SS-33 medium, the plasma concentration of active drug was determined by in vitro antimicrobial assay using *G. lamblia* 713. As a standard curve, pooled plasma from untreated mice was spiked with different concentrations of test compound, and the samples were processed in parallel with the test samples.

## **2.7. Determination of water solubility**

Compounds were dissolved in DMSO at 10 mM and serially diluted 1:3 in DMSO. Two  $\mu$ l of each DMSO solution was transferred into 98  $\mu$ l PBS and shaken for 90 min at room

temperature. Crystal formation was assessed by microscopy and the highest compound concentration without crystal formation was used to estimate water solubility.

## **2.8. In vitro micronucleus assays**

Micronucleus assays were carried out with CHO-K1 cell line as described before (43). Cells were cultured in 12-well plates for 24 h, and then exposed to tested compounds at 100  $\mu$ M concentrations for 24 h. The known mutagen, methyl methanesulfonate (MMS), was used as a positive control. Solvent alone (DMSO) was the negative control. Cells were rinsed with PBS, re-suspended in media, and spread onto pre-cleaned glass slides. After air drying, slides were fixed with 1% glutaraldehyde in PBS for 10 min and stained with Hoechst 33342 (Life technology) and Cell Mask™ deep red plasma membrane stain (Life technology) in PBS for 3 min. For the assessment of micronucleus frequency, at least 1,000 cells with well-preserved cytoplasm were scored using 200  $\times$  magnification following established criteria (44). At least three independent experiments were performed for each test compound.

## **2.9. Assessment of in vivo toxicity**

Adult C57BL/6 mice (Jackson Laboratory) were given five doses of 100 mg/kg of 5-NI compounds orally over a 3-day period. On day 4, blood, small intestine, colon, liver, spleen and kidneys were removed and fixed, and paraffin sections were prepared and stained with hematoxylin and eosin. Standard hematological analysis and determination of plasma levels of albumin, alkaline phosphatase, ALT, AST, bilirubin, creatinine, glucose, and electrolytes were performed in the UCSD Murine Hematology and Coagulation Core Laboratory.

## Supplemental references

1. Beena, Kumar N, Rohilla RK, Roy N, & Rawat DS (2009) Synthesis and antibacterial activity evaluation of metronidazole-triazole conjugates. *Bioorg. Med. Chem. Lett.* 19(5):1396-1398.
2. Hay MP, Lee HH, Wilson WR, Roberts PB, & Denny WA (1995) Hypoxia-selective antitumor agents. 10. bis(nitroimidazoles) and related Bis(nitroheterocycles): development of derivatives with higher rates of metabolic activation under hypoxia and improved aqueous solubility. *J. Med. Chem.* 38(11):1928-1941.
3. Chauviere G, *et al.* (2003) Synthesis and biological activity of nitro heterocycles analogous to megazol, a trypanocidal lead. *J. Med. Chem.* 46(3):427-440.
4. Adebayo ATOM, Bowman WR, & Salt WG (1987) Radical-Nucleophilic Substitution (S<sub>rn</sub>1) Reactions .5. Anions of Nitroimidazoles in S<sub>rn</sub>1 and Oxidative Addition-Reactions. *Journal of the Chemical Society-Perkin Transactions 1* (12):2819-2827.
5. Salgado-Zamora H, Campos E, Jimenez R, Sanchez-Pavon E, & Cervantes H (1999) A convenient approach to the synthesis of the imidazo[5,1-b]oxazole ring system. *Heterocycles* 50(2):1081-1090.
6. Kulkarni S, Grimmett MR, Hanton LR, & Simpson J (1987) Nucleophilic Displacements of Imidazoles .1. Oxygen, Nitrogen and Carbon Nucleophiles. *Aust. J. Chem.* 40(8):1399-1413.
7. Kerins F & O'Shea DF (2002) Generation of substituted styrenes via Suzuki cross-coupling of aryl halides with 2,4,6-trivinylcyclotriboroxane. *J. Org. Chem.* 67(14):4968-4971.

8. Li C, *et al.* (2007) Unusual fluorescence enhancement of a novel carbazolyldiacetylene bound to gold nanoparticles. *Langmuir* 23(12):6754-6760.
9. Abele R, *et al.* (2002) Synthesis and Cytotoxicity of 3-(Hetarylthio)-1-propynyl(trimethyl)silanes. *Chemistry of Heterocyclic Compounds* 38(7):867-872.
10. Toma T, Kita Y, & Fukuyama T (Total synthesis of (+)-manzamine A. *J. Am. Chem. Soc.* 132(30):10233-10235.
11. Hashmi AS, Weyrauch JP, Frey W, & Bats JW (2004) Gold catalysis: mild conditions for the synthesis of oxazoles from N-propargylcarboxamides and mechanistic aspects. *Org Lett* 6(23):4391-4394.
12. Zhou YG, Yang PY, & Han XW (2005) Synthesis and highly enantioselective hydrogenation of exocyclic enamides: (Z)-3-arylidene-4-acetyl-3,4-dihydro-2H-1,4-benzoxazines. *J. Org. Chem.* 70(5):1679-1683.
13. Kosiova I, Janicova A, & Kois P (2006) Synthesis of coumarin or ferrocene labeled nucleosides via Staudinger ligation. *Beilstein J Org Chem* 2:23.
14. Majumdar KC, Ghosh M, & Jana M (2002) Regioselective synthesis of thieno[2,3-b]quinolin-4(9H)-ones: Occurrence of thermal [1,3] sigmatropic rearrangement. *Synthesis-Stuttgart* (5):669-673.
15. Whiting M, *et al.* (2006) Rapid discovery and structure-activity profiling of novel inhibitors of human immunodeficiency virus type 1 protease enabled by the copper(I)-catalyzed synthesis of 1,2,3-triazoles and their further functionalization. *J. Med. Chem.* 49(26):7697-7710.



16. Zheng H, *et al.* (2005) Design, synthesis, and evaluation of novel bifunctional iron-chelators as potential agents for neuroprotection in Alzheimer's, Parkinson's, and other neurodegenerative diseases. *Bioorg. Med. Chem.* 13(3):773-783.
17. Chandra T, Pink M, & Zaleski JM (2001) Macrocyclic metalloenediynes of Cu(II) and Zn(II): a thermal reactivity comparison. *Inorg. Chem.* 40(23):5878-5885.
18. Iddon B, Khan N, & Lim BL (1987) Azoles .7. A Convenient Synthesis of Thieno[2,3-D]Imidazoles. *Journal of the Chemical Society-Perkin Transactions 1* (7):1457-1463.
19. Adriaenssens L, *et al.* (2009) Helquats: a facile, modular, scalable route to novel helical dications. *Chemistry* 15(5):1072-1076.
20. Melo TMVDP, *et al.* (1999) Intramolecular dipolar cycloaddition reaction of 5H,7H-thiazolo[3,4-c]oxazol-4-ium-1-olates: synthesis of chiral 1H-pyrrolo[1,2-c]thiazole derivatives (vol 1, pg 1219, 1999). *Journal of the Chemical Society-Perkin Transactions 1* (13):1897-1897.
21. Gilchrist TL, Wasson RC, King FD, & Wootton G (1987) Formation of Pyridazino[6,1-C][1,4]Oxazin-8(7h)-Ones by Intramolecular Cycloaddition of Azoalkenes. *Journal of the Chemical Society-Perkin Transactions 1* (11):2517-2522.
22. Kobayashi K, Hashimoto K, Fukamachi S, & Konishi H (2008) Synthesis of (Z)-2-[(Z)-3-alkylideneisobenzofuran-1(3H)-ylidene]acetic acid derivatives by sequential coupling-cyclization between 3-(2-iodophenyl)-3-oxopropanoic acid derivatives and terminal alkynes. *Synthesis-Stuttgart* (7):1094-1098.
23. Camí GE, *et al.* (2008) Synthesis and characterization of a Cu(II) complex of 2-benzylmercapto-5-methyl-1,3,4-thiadiazole (C<sub>10</sub>H<sub>10</sub>N<sub>2</sub>S<sub>2</sub>). *J. Coord. Chem.* 61(19):3122-3133.

24. Ramenda T, Kniess T, Bergmann R, Steinbach J, & Wuest F (2009) Radiolabelling of proteins with fluorine-18 via click chemistry. *Chem Commun (Camb)* (48):7521-7523.
25. Rigaut S, *et al.* (2005) Carbon-rich ruthenium complexes containing Bis(allenylidene) and mixed alkynyl-allenylidene bridges. *European Journal of Inorganic Chemistry* (3):447-460.
26. Mabrou M, Bougrin K, Benhida R, Loupy A, & Soufiaoui M (2007) An efficient one-step regiospecific synthesis of novel isoxazolines and isoxazoles of N-substituted saccharin derivatives through solvent-free microwave-assisted [3+2] cycloaddition. *Tetrahedron Lett.* 48(3):443-447.
27. Vereshchagin LI, *et al.* (2006) Polynuclear nonfused tetrazole-, 1,3,4-oxadiazole-, and 1,2,3-triazole-containing systems. *Russian Journal of Organic Chemistry* 42(6):912-917.
28. Rodriguez-Franco MI, Dorronsoro I, Badia A, & Banos JE (2002) Synthesis of new 1-(but-2-ynyl)pyrazoles: containing a pyrrolidine or diethylamine moiety and their muscarinic properties. *Arch. Pharm. (Weinheim)*. 335(7):339-346.
29. Lipshutz BH, Chung DW, Rich B, & Corral R (2006) Simplification of the Mitsunobu reaction. Di-p-chlorobenzyl azodicarboxylate: a new azodicarboxylate. *Org Lett* 8(22):5069-5072.
30. Yang LX & Hofer KG (1996) Synthesis of 2-methyl-5-nitroimidazol-1-yl-acetaldehyde. *Synth. Commun.* 26(19):3653-3657.
31. Guillon R, *et al.* (2009) Design of new antifungal agents: synthesis and evaluation of 1-[(1H-indol-5-ylmethyl)amino]-2-phenyl-3-(1H-1,2,4-triazol-1-yl)propan-2-ols. *Bioorg. Med. Chem. Lett.* 19(20):5833-5836.

32. Townson SM, Laqua H, Upcroft P, Boreham PFL, & Upcroft JA (1992) Induction of Metronidazole and Furazolidone Resistance in *Giardia*. *Trans. R. Soc. Trop. Med. Hyg.* 86(5):521-522.
33. Boreham PFL, Phillips RE, & Shepherd RW (1988) Altered Uptake of Metronidazole In vitro by Stocks of *Giardia-Intestinalis* with Different Drug Sensitivities. *Trans. R. Soc. Trop. Med. Hyg.* 82(1):104-106.
34. Valdez CA, *et al.* (2009) Synthesis and Electrochemistry of 2-Ethenyl and 2-Ethanyl Derivatives of 5-Nitroimidazole and Antimicrobial Activity against *Giardia lamblia*. *J. Med. Chem.* 52(13):4038-4053.
35. Brown DM, Upcroft JA, Dodd HN, Chen N, & Upcroft P (1999) Alternative 2-keto acid oxidoreductase activities in *Trichomonas vaginalis*. *Mol. Biochem. Parasitol.* 98(2):203-214.
36. Goldman LM, Upcroft JA, Workowski K, & Rapkin A (2009) Treatment of metronidazole-resistant *Trichomonas vaginalis*. *Sexual Health* 6(4):345-347
37. Upcroft JA & Upcroft P (2001) Drug Susceptibility Testing of Anaerobic Protozoa. *Antimicrob. Agents Chemother.* 45(6):1810-1814.
38. Clark CG & Diamond LS (2002) Methods for cultivation of luminal parasitic protists of clinical importance. *Clin. Microbiol. Rev.* 15(3):329-+.
39. Kersulyte D, *et al.* (2000) Differences in genotypes of *Helicobacter pylori* from different human populations. *J. Bacteriol.* 182(11):3210-3218.
40. Jeong JY, *et al.* (2001) Roles of FrxA and RdxA nitroreductases of *Helicobacter pylori* in susceptibility and resistance to metronidazole. *J. Bacteriol.* 183(17):5155-5162.

41. Tetko IV, *et al.* (2005) Virtual computational chemistry laboratory--design and description. *J. Comput. Aided. Mol. Des.* 19(6):453-463.
42. Hall M, *et al.* (2009) The WEKA Data Mining Software: An Update. *SIGKDD Explorations* 11(1).
43. OECD (2010) Test No. 487: In Vitro Mammalian Cell Micronucleus Test. <http://dx.doi.org/10.1787/9789264091016-en>.
44. Fenech M (2007) Cytokinesis-block micronucleus cytome assay. *Nature protocols* 2(5):1084-1104.

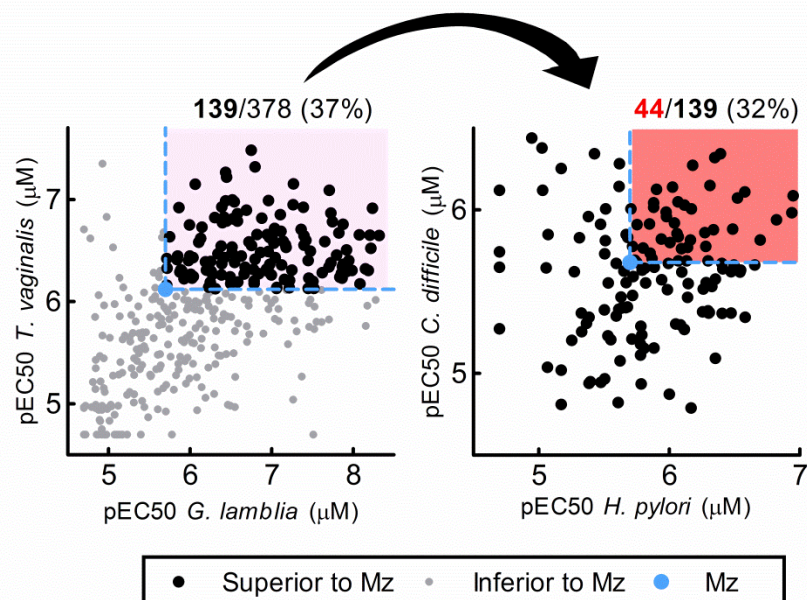

**Figure S1. Expanded antimicrobial activity range of new 5-NI compounds.** The activities of 378 new 5-NI compounds were tested against *G. lamblia* (strain 713), *T. vaginalis* (strain G3), *H. pylori* (strain SS1) and *C. difficile* (ATCC 9689) in 24–48 h growth assays, using ATP content or OD600 as read-outs. Each data point represents the mean value for one compound, with Mz shown in blue for comparison. The graphs depict relationships between activities of individual compounds against the four target pathogens. The left panel shows correlations for antiprotozoan activities. The region with compounds that exceeded the activity of Mz for both protozoa is shaded light red. These superior compounds (black circles) were then analyzed for their activities against the two bacteria (right panel). The region containing compounds with superior activity against all four pathogens is shaded in dark red.

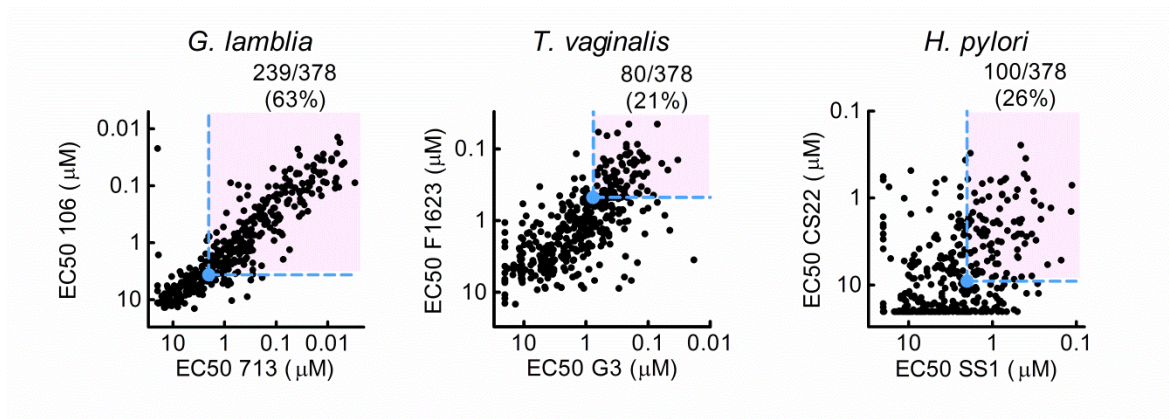

**Figure S2. Relationship of compound activities between clinical isolates.** The 5-NI library was tested for activity against two different clinical Mz-sensitive (MzS) isolates of *G. lamblia* (strains 713 and 106), *T. vaginalis* (strains G3 and F1623), and *H. pylori* (strains SS1 and CS22). Compounds with greater activity than Mz (light blue point) against both of the respective Mz-sensitive isolates are highlighted by light red shading (and their numbers and percentages of all tested compounds are given above the region).

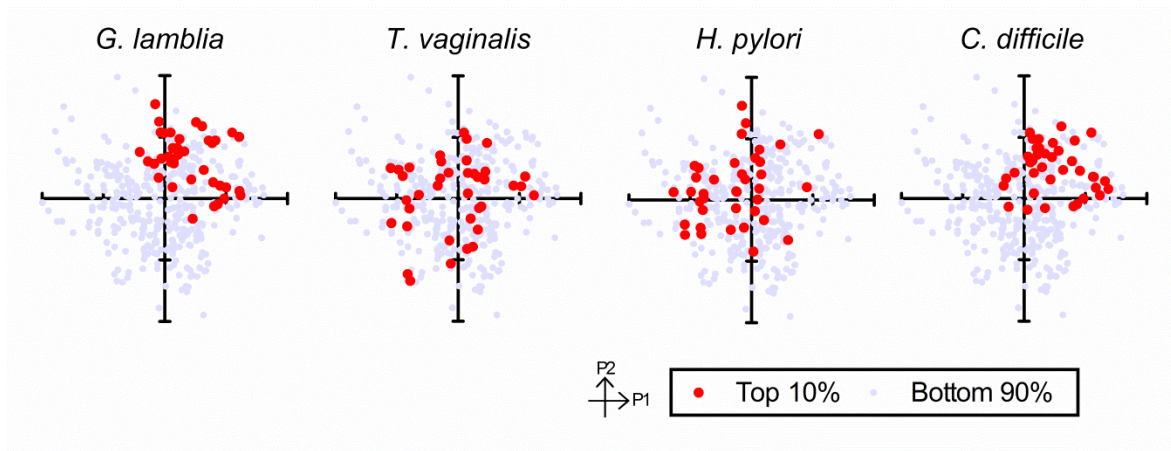

**Figure S3. Distribution of active 5-NI compounds in chemical space.** A structural space was generated by principal component analysis using activity data of all 378 compounds in the 5-NI library against the four target microbes, and the individual compounds were plotted in the resulting space. The top 10% most potent compounds are shown in red for activity against Mz-sensitive (MzS) isolates of each of the indicated pathogens. All other compounds are shown in light gray.

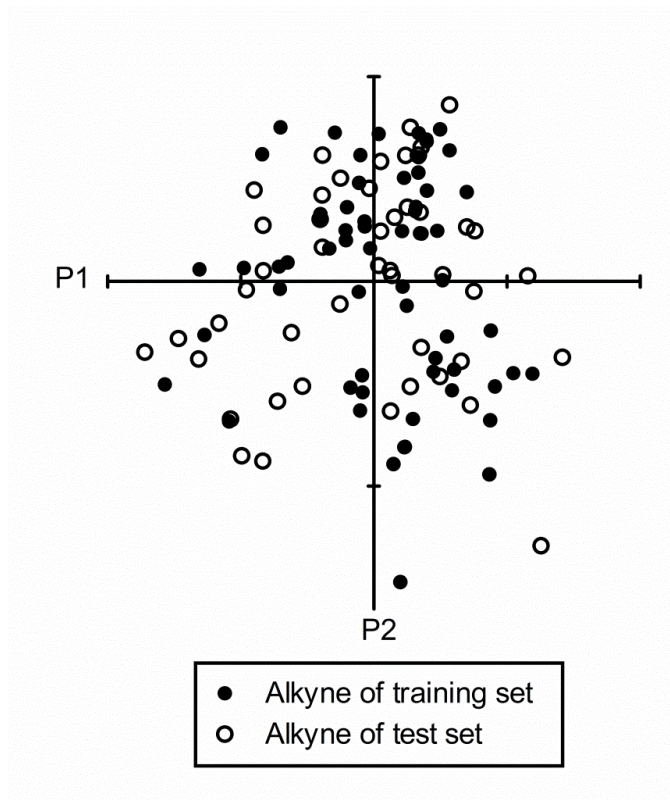

**Figure S4. Structural analysis of alkyne sets used in library generation.** Alkynes used for synthesizing the training triazole compounds (closed circles) or test triazole compounds (open circles) were analyzed by principal component analysis for their distribution in a common structural space.



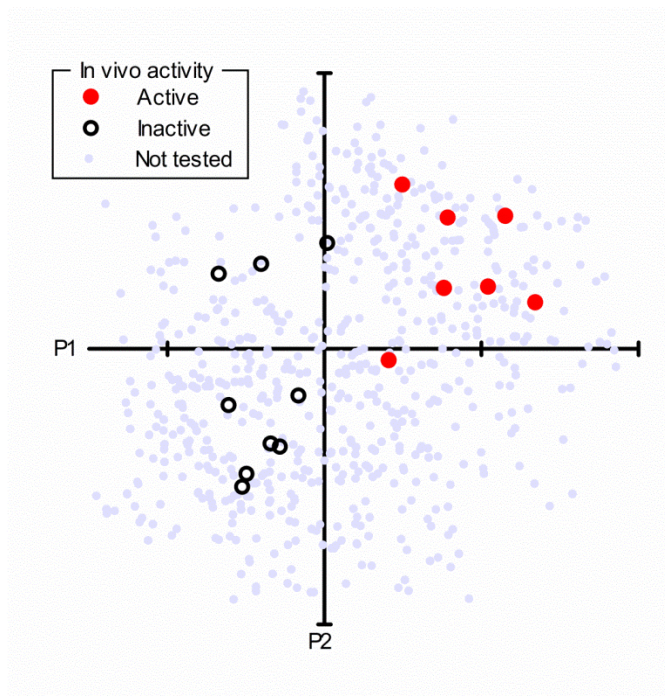

**Figure S5. Structural analysis of in vivo active 5-NI compounds.** A structural space was generated by principal component analysis for all 659 compounds in the total 5-NI library. Compounds that were efficacious in the mouse giardiasis model are shown as red dots. Compounds not active in vivo are shown as black open circles, while the small gray dots represent all other 5-NI compounds in the library not tested in vivo.

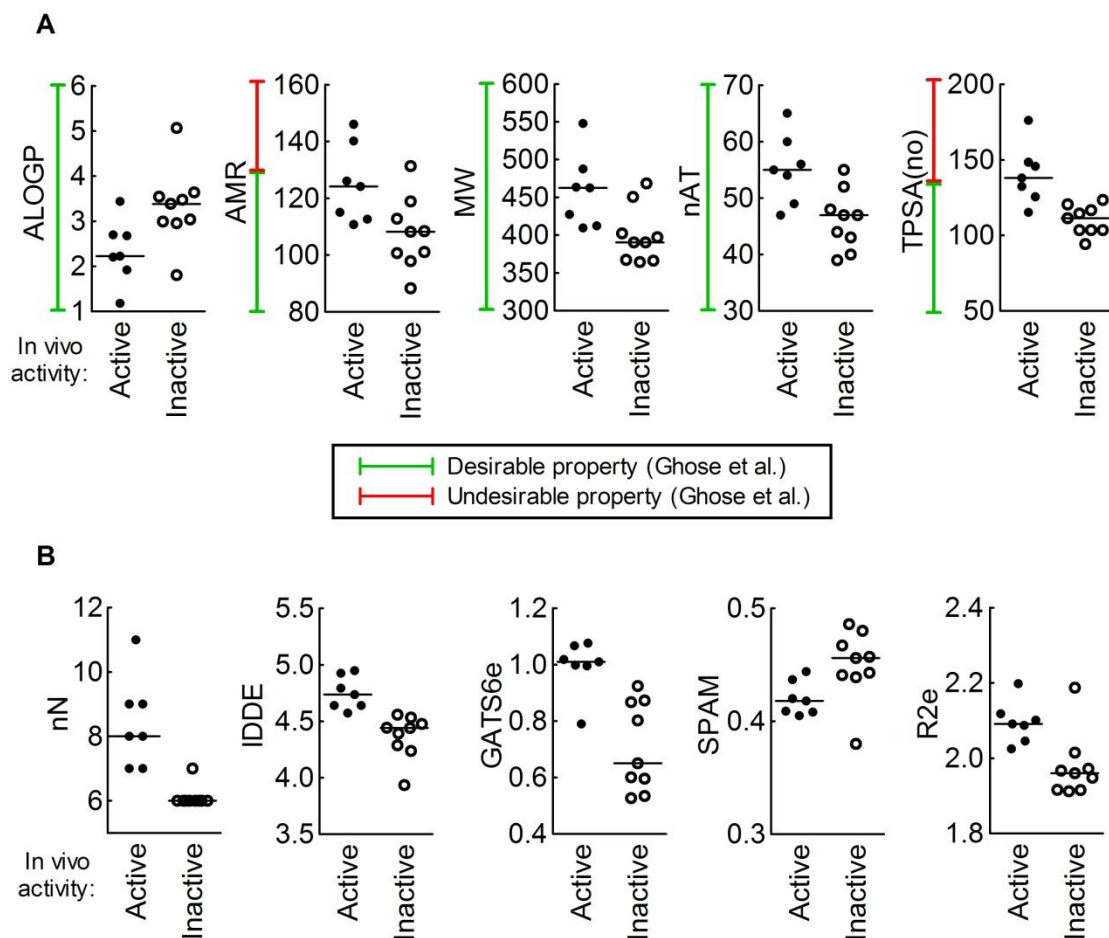

**Figure S6. Chemical descriptors for prediction of in vivo activity.** A. Comparison of five chemical descriptors by Lipinski's profiling tool. Each data point shows the value of the indicated chemical descriptor for compounds tested in vivo. Active compounds (closed circles) cleared *Giardia* infection in mice, while inactive compounds (open circles) did not (see Fig. 6). Means are shown as horizontal lines for each group. Vertical lines on the left of each panel indicate the preferred range for drug likeness as characterized by Ghose et al. (21); green, preferable; red, not preferable. B. Comparison of five alternative chemical descriptors for prediction of in vivo activity, as selected by a machine learning algorithm trained by data from the in vivo studies. These descriptors were used for the principal component analysis shown in Fig. S5. Explanations: nN, Number of nitrogen atoms; IDDE, Mean information content on the distance degree equality; GATS6e, Geary autocorrelation of lag 6 weighted by Sanderson electronegativity; SPAM, Average span R geometrical descriptors; R2e, R autocorrelation of lag 2 weighted by Sanderson electronegativity.

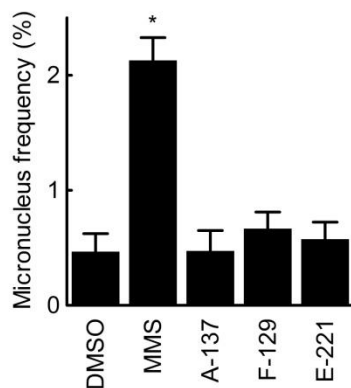

**Figure S7. Micronucleus assays for genotoxicity evaluation.** CHO-K1 cells were exposed to the indicated test compounds for 24 h, fixed, and stained with a DNA dye (Hoechst 33342) and a cellular counterstain (Cell Mask™ membrane stain). The mutagen, methyl methanesulfonate (MMS), was used as a positive control. Micronuclei were microscopically counted in at least 1,000 cells per sample, and are expressed as percentage of all cells. Bars represent mean + SE of the data from 3-5 independent experiments. \* $p < 0.001$  (t-test) vs. DMSO controls

**Table S1a. Structures of core A-C training compounds**

| Alkyne | Core A |           | Core B |           | Core C |           |
|--------|--------|-----------|--------|-----------|--------|-----------|
|        | Name   | Structure | Name   | Structure | Name   | Structure |
| 101    | A-101  |           | B-101  |           | C-101  |           |
| 102    | A-102  |           | B-102  |           | C-102  |           |
| 103    | A-103  |           | B-103  |           | C-103  |           |
| 104    | A-104  |           | B-104  |           | C-104  |           |
| 105    | A-105  |           | B-105  |           | C-105  |           |
| 106    | A-106  |           | B-106  |           | C-106  |           |
| 107    | A-107  |           | B-107  |           | C-107  |           |
| 108    | A-108  |           | B-108  |           | C-108  |           |
| 109    | A-109  |           | B-109  |           | C-109  |           |
| 110    | A-110  |           | B-110  |           | C-110  |           |
| 111    | A-111  |           | B-111  |           | C-111  |           |
| 112    | A-112  |           | B-112  |           | C-112  |           |
| 113    | A-113  |           | B-113  |           | C-113  |           |
| 114    | A-114  |           | B-114  |           | C-114  |           |
| 115    | A-115  |           | B-115  |           | C-115  |           |

**Table S1a. Structures of core A-C training compounds**

| Alkyne | Core A |           | Core B |           | Core C |           |
|--------|--------|-----------|--------|-----------|--------|-----------|
|        | Name   | Structure | Name   | Structure | Name   | Structure |
| 116    | A-116  |           | B-116  |           | C-116  |           |
| 117    | A-117  |           | B-117  |           | C-117  |           |
| 118    | A-118  |           | B-118  |           | C-118  |           |
| 119    | A-119  |           | B-119  |           | C-119  |           |
| 120    | A-120  |           | B-120  |           | C-120  |           |
| 121    | A-121  |           | B-121  |           | C-121  |           |
| 122    | A-122  |           | B-122  |           | C-122  |           |
| 123    | A-123  |           | B-123  |           | C-123  |           |
| 124    | A-124  |           | B-124  |           | C-124  |           |
| 125    | A-125  |           | B-125  |           | C-125  |           |
| 126    | A-126  |           | B-126  |           | C-126  |           |
| 127    | A-127  |           | B-127  |           | C-127  |           |
| 128    | A-128  |           | B-128  |           | C-128  |           |
| 129    | A-129  |           | B-129  |           | C-129  |           |

**Table S1a. Structures of core A-C training compounds**

| Alkyne | Core A |           | Core B |           | Core C |           |
|--------|--------|-----------|--------|-----------|--------|-----------|
|        | Name   | Structure | Name   | Structure | Name   | Structure |
| 130    | A-130  |           | B-130  |           | C-130  |           |
| 131    | A-131  |           | B-131  |           | C-131  |           |
| 132    | A-132  |           | B-132  |           | C-132  |           |
| 133    | A-133  |           | B-133  |           | C-133  |           |
| 134    | A-134  |           | B-134  |           | C-134  |           |
| 135    | A-135  |           | B-135  |           | C-135  |           |
| 136    | A-136  |           | B-136  |           | C-136  |           |
| 137    | A-137  |           | B-137  |           | C-137  |           |
| 138    | A-138  |           | B-138  |           | C-138  |           |
| 139    | A-139  |           | B-139  |           | C-139  |           |
| 140    | A-140  |           | B-140  |           | C-140  |           |
| 141    | A-141  |           | B-141  |           | C-141  |           |
| 142    | A-142  |           | B-142  |           | C-142  |           |

**Table S1a. Structures of core A-C training compounds**

| Alkyne | Core A |           | Core B |           | Core C |           |
|--------|--------|-----------|--------|-----------|--------|-----------|
|        | Name   | Structure | Name   | Structure | Name   | Structure |
| 143    | A-143  |           | B-143  |           | C-143  |           |
| 144    | A-144  |           | B-144  |           | C-144  |           |
| 145    | A-145  |           | B-145  |           | C-145  |           |
| 146    | A-146  |           | B-146  |           | C-146  |           |
| 147    | A-147  |           | B-147  |           | C-147  |           |
| 148    | A-148  |           | B-148  |           | C-148  |           |
| 149    | A-149  |           | B-149  |           | C-149  |           |
| 150    | A-150  |           | B-150  |           | C-150  |           |
| 151    | A-151  |           | B-151  |           | C-151  |           |
| 152    | A-152  |           | B-152  |           | C-152  |           |
| 153    | A-153  |           | B-153  |           | C-153  |           |
| 154    | A-154  |           | B-154  |           | C-154  |           |
| 155    | A-155  |           | B-155  |           | C-155  |           |

**Table S1a. Structures of core A-C training compounds**

| Alkyne | Core A |           | Core B |           | Core C |           |
|--------|--------|-----------|--------|-----------|--------|-----------|
|        | Name   | Structure | Name   | Structure | Name   | Structure |
| 156    | A-156  |           | B-156  |           | C-156  |           |
| 157    | A-157  |           | B-157  |           | C-157  |           |
| 158    | A-158  |           | B-158  |           | C-158  |           |
| 159    | A-159  |           | B-159  |           | C-159  |           |
| 160    | A-160  |           | B-160  |           | C-160  |           |
| 161    | A-161  |           | B-161  |           | C-161  |           |
| 162    | A-162  |           | B-162  |           | C-162  |           |
| 163    | A-163  |           | B-163  |           | C-163  |           |



**Table S1b. Structures of core D-F training compounds**

| Alkyne | Core D |           | Core E |           | Core F |           |
|--------|--------|-----------|--------|-----------|--------|-----------|
|        | Name   | Structure | Name   | Structure | Name   | Structure |
| 101    | D-101  |           | E-101  |           | F-101  |           |
| 102    | D-102  |           | E-102  |           | F-102  |           |
| 103    | D-103  |           | E-103  |           | F-103  |           |
| 104    | D-104  |           | E-104  |           | F-104  |           |
| 105    | D-105  |           | E-105  |           | F-105  |           |
| 106    | D-106  |           | E-106  |           | F-106  |           |
| 107    | D-107  |           | E-107  |           | F-107  |           |
| 108    | D-108  |           | E-108  |           | F-108  |           |
| 109    | D-109  |           | E-109  |           | F-109  |           |
| 110    | D-110  |           | E-110  |           | F-110  |           |

**Table S1b. Structures of core D-F training compounds**

| Alkyne | Core D |           | Core E |           | Core F |           |
|--------|--------|-----------|--------|-----------|--------|-----------|
|        | Name   | Structure | Name   | Structure | Name   | Structure |
| 111    | D-111  |           | E-111  |           | F-111  |           |
| 112    | D-112  |           | E-112  |           | F-112  |           |
| 113    | D-113  |           | E-113  |           | F-113  |           |
| 114    | D-114  |           | E-114  |           | F-114  |           |
| 115    | D-115  |           | E-115  |           | F-115  |           |
| 116    | D-116  |           | E-116  |           | F-116  |           |
| 117    | D-117  |           | E-117  |           | F-117  |           |
| 118    | D-118  |           | E-118  |           | F-118  |           |
| 119    | D-119  |           | E-119  |           | F-119  |           |
| 120    | D-120  |           | E-120  |           | F-120  |           |

**Table S1b. Structures of core D-F training compounds**

| Alkyne | Core D |           | Core E |           | Core F |           |
|--------|--------|-----------|--------|-----------|--------|-----------|
|        | Name   | Structure | Name   | Structure | Name   | Structure |
| 121    | D-121  |           | E-121  |           | F-121  |           |
| 122    | D-122  |           | E-122  |           | F-122  |           |
| 123    | D-123  |           | E-123  |           | F-123  |           |
| 124    | D-124  |           | E-124  |           | F-124  |           |
| 125    | D-125  |           | E-125  |           | F-125  |           |
| 126    | D-126  |           | E-126  |           | F-126  |           |
| 127    | D-127  |           | E-127  |           | F-127  |           |
| 128    | D-128  |           | E-128  |           | F-128  |           |
| 129    | D-129  |           | E-129  |           | F-129  |           |
| 130    | D-130  |           | E-130  |           | F-130  |           |

**Table S1b. Structures of core D-F training compounds**

| Alkyne | Core D |           | Core E |           | Core F |           |
|--------|--------|-----------|--------|-----------|--------|-----------|
|        | Name   | Structure | Name   | Structure | Name   | Structure |
| 131    | D-131  |           | E-131  |           | F-131  |           |
| 132    | D-132  |           | E-132  |           | F-132  |           |
| 133    | D-133  |           | E-133  |           | F-133  |           |
| 134    | D-134  |           | E-134  |           | F-134  |           |
| 135    | D-135  |           | E-135  |           | F-135  |           |
| 136    | D-136  |           | E-136  |           | F-136  |           |
| 137    | D-137  |           | E-137  |           | F-137  |           |
| 138    | D-138  |           | E-138  |           | F-138  |           |
| 139    | D-139  |           | E-139  |           | F-139  |           |

**Table S1b. Structures of core D-F training compounds**

| Alkyne | Core D |           | Core E |           | Core F |           |
|--------|--------|-----------|--------|-----------|--------|-----------|
|        | Name   | Structure | Name   | Structure | Name   | Structure |
| 140    | D-140  |           | E-140  |           | F-140  |           |
| 141    | D-141  |           | E-141  |           | F-141  |           |
| 142    | D-142  |           | E-142  |           | F-142  |           |
| 143    | D-143  |           | E-143  |           | F-143  |           |
| 144    | D-144  |           | E-144  |           | F-144  |           |
| 145    | D-145  |           | E-145  |           | F-145  |           |
| 146    | D-146  |           | E-146  |           | F-146  |           |
| 147    | D-147  |           | E-147  |           | F-147  |           |
| 148    | D-148  |           | E-148  |           | F-148  |           |

**Table S1b. Structures of core D-F training compounds**

| Alkyne | Core D |           | Core E |           | Core F |           |
|--------|--------|-----------|--------|-----------|--------|-----------|
|        | Name   | Structure | Name   | Structure | Name   | Structure |
| 149    | D-149  |           | E-149  |           | F-149  |           |
| 150    | D-150  |           | E-150  |           | F-150  |           |
| 151    | D-151  |           | E-151  |           | F-151  |           |
| 152    | D-152  |           | E-152  |           | F-152  |           |
| 153    | D-153  |           | E-153  |           | F-153  |           |
| 154    | D-154  |           | E-154  |           | F-154  |           |
| 155    | D-155  |           | E-155  |           | F-155  |           |
| 156    | D-156  |           | E-156  |           | F-156  |           |
| 157    | D-157  |           | E-157  |           | F-157  |           |
| 158    | D-158  |           | E-158  |           | F-158  |           |

**Table S1b. Structures of core D-F training compounds**

| Alkyne | Core D |                                                                                   | Core E |                                                                                   | Core F |                                                                                     |
|--------|--------|-----------------------------------------------------------------------------------|--------|-----------------------------------------------------------------------------------|--------|-------------------------------------------------------------------------------------|
|        | Name   | Structure                                                                         | Name   | Structure                                                                         | Name   | Structure                                                                           |
| 159    | D-159  | 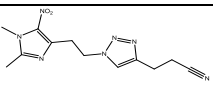 | E-159  |  | F-159  |  |
| 160    | D-160  |  | E-160  |  | F-160  |  |
| 161    | D-161  |  | E-161  |  | F-161  |  |
| 162    | D-162  |  | E-162  |  | F-162  |  |
| 163    | D-163  |  | E-163  |  | F-163  |  |

**Table S2. Activity of 5-NI compounds against *Giardia lamblia***

| Compound | <i>G. lamblia</i> 713 |             |           |             | <i>G. lamblia</i> 106 |             |           |             |
|----------|-----------------------|-------------|-----------|-------------|-----------------------|-------------|-----------|-------------|
|          | MzS                   |             | MzR       |             | MzS                   |             | MzR       |             |
|          | EC50 (μM)             | pEC50       | EC50 (μM) | pEC50       | EC50 (μM)             | pEC50       | EC50 (μM) | pEC50       |
| Mz       | 1.995                 | 5.70 ± 0.01 | 50.119    | 4.30 ± 0.02 | 3.631                 | 5.44 ± 0.01 | 77.625    | 4.11 ± 0.02 |
| A-101    | 1.056                 | 5.98 ± 0.02 | 10.041    | 5.00 ± 0.04 | 0.962                 | 6.02 ± 0.14 | 5.943     | 5.23 ± 0.12 |
| A-102    | 1.791                 | 5.75 ± 0.02 | 13.392    | 4.87 ± 0.04 | 2.171                 | 5.66 ± 0.14 | 7.727     | 5.11 ± 0.14 |
| A-103    | 0.212                 | 6.67 ± 0.02 | 2.248     | 5.65 ± 0.12 | 0.227                 | 6.64 ± 0.19 | 1.445     | 5.84 ± 0.15 |
| A-104    | 3.961                 | 5.40 ± 0.06 | 18.261    | 4.74 ± 0.04 | 4.677                 | 5.33 ± 0.25 | 9.404     | 5.03 ± 0.12 |
| A-105    | 4.636                 | 5.33 ± 0.13 | 10.928    | 4.96 ± 0.25 | 2.754                 | 5.56 ± 0.25 | 8.643     | 5.06 ± 0.12 |
| A-106    | 5.401                 | 5.27 ± 0.06 | 11.150    | 4.95 ± 0.18 | 3.715                 | 5.43 ± 0.27 | 10.077    | 5.00 ± 0.10 |
| A-107    | 2.487                 | 5.60 ± 0.04 | 11.658    | 4.93 ± 0.12 | 2.997                 | 5.52 ± 0.18 | 10.000    | 5.00 ± 0.09 |
| A-108    | 3.665                 | 5.44 ± 0.02 | 14.385    | 4.84 ± 0.10 | 2.929                 | 5.53 ± 0.19 | 7.989     | 5.10 ± 0.21 |
| A-109    | 3.545                 | 5.45 ± 0.04 | 10.648    | 4.97 ± 0.20 | 3.831                 | 5.42 ± 0.15 | 9.829     | 5.01 ± 0.16 |
| A-110    | 3.468                 | 5.46 ± 0.04 | 9.737     | 5.01 ± 0.29 | 3.951                 | 5.40 ± 0.23 | 11.614    | 4.94 ± 0.13 |
| A-111    | 0.951                 | 6.02 ± 0.11 | 4.806     | 5.32 ± 0.15 | 2.188                 | 5.66 ± 0.08 | 8.366     | 5.08 ± 0.16 |
| A-112    | 2.686                 | 5.57 ± 0.04 | 13.853    | 4.86 ± 0.08 | 2.570                 | 5.59 ± 0.12 | 10.174    | 4.99 ± 0.14 |
| A-113    | 0.633                 | 6.20 ± 0.04 | 8.326     | 5.08 ± 0.08 | 0.832                 | 6.08 ± 0.15 | 5.821     | 5.24 ± 0.14 |
| A-114    | 3.874                 | 5.41 ± 0.02 | 15.476    | 4.81 ± 0.07 | 4.433                 | 5.35 ± 0.32 | 9.226     | 5.04 ± 0.08 |
| A-115    | 3.625                 | 5.44 ± 0.01 | 12.963    | 4.89 ± 0.03 | 3.467                 | 5.46 ± 0.24 | 11.285    | 4.95 ± 0.11 |
| A-116    | 0.551                 | 6.26 ± 0.04 | 7.622     | 5.12 ± 0.06 | 0.676                 | 6.17 ± 0.21 | 3.090     | 5.51 ± 0.12 |
| A-117    | 0.077                 | 7.11 ± 0.11 | 1.621     | 5.79 ± 0.18 | 0.106                 | 6.98 ± 0.18 | 1.230     | 5.91 ± 0.39 |
| A-118    | 0.079                 | 7.10 ± 0.28 | 0.761     | 6.12 ± 0.24 | 0.671                 | 6.17 ± 0.35 | 6.202     | 5.21 ± 0.20 |
| A-119    | 0.491                 | 6.31 ± 0.05 | 10.163    | 4.99 ± 0.05 | 0.992                 | 6.00 ± 0.12 | 8.777     | 5.06 ± 0.12 |
| A-120    | 4.233                 | 5.37 ± 0.03 | 15.474    | 4.81 ± 0.06 | 3.715                 | 5.43 ± 0.20 | 8.254     | 5.08 ± 0.14 |
| A-121    | 2.308                 | 5.64 ± 0.04 | 13.254    | 4.88 ± 0.09 | 2.154                 | 5.67 ± 0.24 | 7.470     | 5.13 ± 0.12 |
| A-122    | 6.740                 | 5.17 ± 0.03 | >20       | <4.70       | 4.898                 | 5.31 ± 0.22 | 12.589    | 4.90 ± 0.11 |
| A-123    | 2.790                 | 5.55 ± 0.01 | 13.109    | 4.88 ± 0.09 | 1.920                 | 5.72 ± 0.20 | 6.213     | 5.21 ± 0.13 |
| A-124    | 12.812                | 4.89 ± 0.03 | 18.881    | 4.72 ± 0.02 | 5.580                 | 5.25 ± 0.24 | 12.882    | 4.89 ± 0.10 |
| A-125    | >20                   | <4.70       | >20       | <4.70       | 6.918                 | 5.16 ± 0.15 | 14.454    | 4.84 ± 0.08 |
| A-126    | 5.282                 | 5.28 ± 0.06 | 23.805    | 4.62 ± 0.08 | 5.799                 | 5.24 ± 0.07 | 14.454    | 4.84 ± 0.07 |
| A-127    | 0.034                 | 7.47 ± 0.08 | 2.013     | 5.70 ± 0.05 | 0.168                 | 6.78 ± 0.67 | 7.189     | 5.14 ± 0.11 |
| A-128    | 0.280                 | 6.55 ± 0.23 | 2.494     | 5.60 ± 0.12 | 2.239                 | 5.65 ± 0.09 | 10.715    | 4.97 ± 0.03 |
| A-129    | 0.132                 | 6.88 ± 0.12 | 0.712     | 6.15 ± 0.32 | 0.540                 | 6.27 ± 0.15 | 3.187     | 5.50 ± 0.36 |
| A-130    | 0.040                 | 7.40 ± 0.07 | 1.472     | 5.83 ± 0.09 | 0.059                 | 7.23 ± 0.18 | 2.531     | 5.60 ± 0.17 |
| A-131    | 0.110                 | 6.96 ± 0.05 | 5.567     | 5.25 ± 0.18 | 0.151                 | 6.82 ± 0.14 | 3.890     | 5.41 ± 0.39 |
| A-132    | 19.088                | 4.72 ± 0.02 | >20       | <4.70       | 1.641                 | 5.79 ± 0.74 | 14.905    | 4.83 ± 0.07 |
| A-133    | 2.905                 | 5.54 ± 0.04 | 17.477    | 4.76 ± 0.06 | 3.494                 | 5.46 ± 0.06 | 14.017    | 4.85 ± 0.08 |
| A-134    | 0.205                 | 6.69 ± 0.02 | 3.767     | 5.42 ± 0.06 | 0.295                 | 6.53 ± 0.13 | 2.291     | 5.64 ± 0.14 |
| A-135    | 0.092                 | 7.03 ± 0.04 | 1.510     | 5.82 ± 0.13 | 0.178                 | 6.75 ± 0.14 | 1.328     | 5.88 ± 0.14 |
| A-136    | 1.263                 | 5.90 ± 0.03 | 11.733    | 4.93 ± 0.03 | 1.549                 | 5.81 ± 0.08 | 11.548    | 4.94 ± 0.09 |
| A-137    | 0.285                 | 6.55 ± 0.19 | 2.137     | 5.67 ± 0.15 | 1.339                 | 5.87 ± 0.29 | 4.597     | 5.34 ± 0.25 |
| A-138    | 0.307                 | 6.51 ± 0.07 | 7.630     | 5.12 ± 0.11 | 1.259                 | 5.90 ± 0.29 | 11.548    | 4.94 ± 0.09 |
| A-139    | 0.385                 | 6.41 ± 0.04 | 5.168     | 5.29 ± 0.09 | 0.708                 | 6.15 ± 0.18 | 6.060     | 5.22 ± 0.12 |
| A-140    | 0.177                 | 6.75 ± 0.05 | 4.164     | 5.38 ± 0.11 | 0.240                 | 6.62 ± 0.15 | 2.630     | 5.58 ± 0.09 |
| A-141    | 0.116                 | 6.94 ± 0.02 | 3.396     | 5.47 ± 0.08 | 0.049                 | 7.31 ± 0.59 | 1.698     | 5.77 ± 0.14 |
| A-142    | 14.312                | 4.84 ± 0.03 | 17.477    | 4.76 ± 0.06 | 9.624                 | 5.02 ± 0.05 | 16.596    | 4.78 ± 0.08 |
| A-143    | 0.910                 | 6.04 ± 0.00 | 9.302     | 5.03 ± 0.03 | 0.295                 | 6.53 ± 0.49 | 5.158     | 5.29 ± 0.07 |
| A-144    | 14.312                | 4.84 ± 0.02 | 17.671    | 4.75 ± 0.05 | 7.822                 | 5.11 ± 0.06 | 18.302    | 4.74 ± 0.04 |
| A-145    | 1.008                 | 6.00 ± 0.10 | 9.510     | 5.02 ± 0.05 | 4.241                 | 5.37 ± 0.13 | 15.578    | 4.81 ± 0.06 |
| A-146    | 0.082                 | 7.09 ± 0.12 | 0.286     | 6.54 ± 0.18 | 0.138                 | 6.86 ± 0.38 | 1.923     | 5.72 ± 0.53 |
| A-147    | 0.314                 | 6.50 ± 0.09 | 0.573     | 6.24 ± 0.13 | 1.393                 | 5.86 ± 0.17 | 12.647    | 4.90 ± 0.05 |
| A-148    | 0.013                 | 7.88 ± 0.11 | 0.391     | 6.41 ± 0.11 | 0.150                 | 6.83 ± 0.24 | 3.020     | 5.52 ± 0.08 |



**Table S2. Activity of 5-NI compounds against *Giardia lamblia***

| Compound | <i>G. lamblia</i> 713 |             |           |             | <i>G. lamblia</i> 106 |             |           |             |
|----------|-----------------------|-------------|-----------|-------------|-----------------------|-------------|-----------|-------------|
|          | MzS                   |             | MzR       |             | MzS                   |             | MzR       |             |
|          | EC50 (μM)             | pEC50       | EC50 (μM) | pEC50       | EC50 (μM)             | pEC50       | EC50 (μM) | pEC50       |
| A-149    | 0.143                 | 6.84 ± 0.16 | 0.363     | 6.44 ± 0.02 | 0.431                 | 6.37 ± 0.18 | 2.333     | 5.63 ± 0.19 |
| A-150    | 0.306                 | 6.51 ± 0.21 | 1.388     | 5.86 ± 0.07 | 4.487                 | 5.35 ± 0.18 | 11.912    | 4.92 ± 0.06 |
| A-151    | 0.109                 | 6.96 ± 0.10 | 1.330     | 5.88 ± 0.18 | 0.613                 | 6.21 ± 0.49 | 3.266     | 5.49 ± 0.37 |
| A-152    | 1.188                 | 5.93 ± 0.10 | 10.980    | 4.96 ± 0.03 | 2.309                 | 5.64 ± 0.11 | 12.882    | 4.89 ± 0.07 |
| A-153    | 0.283                 | 6.55 ± 0.13 | 2.615     | 5.58 ± 0.22 | 2.934                 | 5.53 ± 0.16 | 7.039     | 5.15 ± 0.12 |
| A-154    | 0.411                 | 6.39 ± 0.34 | 9.404     | 5.03 ± 0.05 | 1.370                 | 5.86 ± 0.03 | 7.120     | 5.15 ± 0.10 |
| A-155    | 0.303                 | 6.52 ± 0.02 | 6.109     | 5.21 ± 0.08 | 0.571                 | 6.24 ± 0.05 | 5.041     | 5.30 ± 0.11 |
| A-156    | 0.366                 | 6.44 ± 0.02 | 6.901     | 5.16 ± 0.10 | 0.737                 | 6.13 ± 0.09 | 7.161     | 5.15 ± 0.05 |
| A-157    | 0.525                 | 6.28 ± 0.04 | 8.006     | 5.10 ± 0.16 | 2.101                 | 5.68 ± 0.09 | 10.965    | 4.96 ± 0.01 |
| A-158    | 1.444                 | 5.84 ± 0.03 | 13.656    | 4.86 ± 0.08 | 1.644                 | 5.78 ± 0.07 | 11.049    | 4.96 ± 0.04 |
| A-159    | 5.053                 | 5.30 ± 0.02 | 18.265    | 4.74 ± 0.04 | 5.781                 | 5.24 ± 0.09 | 16.218    | 4.79 ± 0.05 |
| A-160    | 6.306                 | 5.20 ± 0.04 | 14.221    | 4.85 ± 0.07 | 5.105                 | 5.29 ± 0.16 | 18.197    | 4.74 ± 0.03 |
| A-161    | 1.867                 | 5.73 ± 0.03 | 14.325    | 4.84 ± 0.07 | 2.477                 | 5.61 ± 0.08 | 12.303    | 4.91 ± 0.04 |
| A-162    | 4.233                 | 5.37 ± 0.03 | 15.309    | 4.82 ± 0.12 | 4.332                 | 5.36 ± 0.10 | 13.412    | 4.87 ± 0.06 |
| A-163    | 0.235                 | 6.63 ± 0.01 | 6.906     | 5.16 ± 0.15 | 0.341                 | 6.47 ± 0.06 | 4.704     | 5.33 ± 0.22 |
| B-101    | 1.183                 | 5.93 ± 0.04 | 8.046     | 5.09 ± 0.08 | 1.585                 | 5.80 ± 0.03 | 9.661     | 5.02 ± 0.03 |
| B-102    | 1.563                 | 5.81 ± 0.04 | 7.698     | 5.11 ± 0.10 | 3.802                 | 5.42 ± 0.01 | 10.902    | 4.96 ± 0.01 |
| B-103    | 0.402                 | 6.40 ± 0.09 | 2.496     | 5.60 ± 0.06 | 0.533                 | 6.27 ± 0.09 | 4.121     | 5.39 ± 0.16 |
| B-104    | 3.104                 | 5.51 ± 0.06 | 13.086    | 4.88 ± 0.07 | 5.412                 | 5.27 ± 0.15 | 12.662    | 4.90 ± 0.07 |
| B-105    | 5.522                 | 5.26 ± 0.10 | 14.633    | 4.83 ± 0.08 | 7.079                 | 5.15 ± 0.17 | 13.032    | 4.89 ± 0.06 |
| B-106    | 4.524                 | 5.34 ± 0.11 | 13.099    | 4.88 ± 0.09 | 5.754                 | 5.24 ± 0.17 | 12.882    | 4.89 ± 0.06 |
| B-107    | 1.648                 | 5.78 ± 0.05 | 11.440    | 4.94 ± 0.09 | 1.891                 | 5.72 ± 0.04 | 7.371     | 5.13 ± 0.11 |
| B-108    | 2.328                 | 5.63 ± 0.13 | 9.606     | 5.02 ± 0.06 | 4.433                 | 5.35 ± 0.09 | 10.233    | 4.99 ± 0.01 |
| B-109    | 3.874                 | 5.41 ± 0.06 | 13.099    | 4.88 ± 0.09 | 7.189                 | 5.14 ± 0.11 | 12.589    | 4.90 ± 0.03 |
| B-110    | 2.178                 | 5.66 ± 0.03 | 12.531    | 4.90 ± 0.07 | 4.713                 | 5.33 ± 0.10 | 12.209    | 4.91 ± 0.02 |
| B-111    | 0.921                 | 6.04 ± 0.02 | 4.625     | 5.33 ± 0.04 | 2.399                 | 5.62 ± 0.04 | 9.190     | 5.04 ± 0.06 |
| B-112    | 1.976                 | 5.70 ± 0.03 | 13.999    | 4.85 ± 0.08 | 3.890                 | 5.41 ± 0.10 | 10.965    | 4.96 ± 0.02 |
| B-113    | 0.592                 | 6.23 ± 0.07 | 5.901     | 5.23 ± 0.16 | 0.905                 | 6.04 ± 0.01 | 6.072     | 5.22 ± 0.15 |
| B-114    | 2.130                 | 5.67 ± 0.03 | 13.099    | 4.88 ± 0.09 | 4.571                 | 5.34 ± 0.05 | 10.715    | 4.97 ± 0.02 |
| B-115    | 3.104                 | 5.51 ± 0.05 | 13.392    | 4.87 ± 0.09 | 7.943                 | 5.10 ± 0.07 | 10.881    | 4.96 ± 0.03 |
| B-116    | 0.723                 | 6.14 ± 0.13 | 6.033     | 5.22 ± 0.13 | 2.362                 | 5.63 ± 0.05 | 8.577     | 5.07 ± 0.12 |
| B-117    | 0.258                 | 6.59 ± 0.16 | 0.502     | 6.30 ± 0.28 | 0.234                 | 6.63 ± 0.05 | 1.622     | 5.79 ± 0.44 |
| B-118    | 1.046                 | 5.98 ± 0.24 | 5.463     | 5.26 ± 0.10 | 0.529                 | 6.28 ± 0.11 | 1.905     | 5.72 ± 0.25 |
| B-119    | 1.191                 | 5.92 ± 0.05 | 8.792     | 5.06 ± 0.26 | 2.222                 | 5.65 ± 0.06 | 7.328     | 5.14 ± 0.17 |
| B-120    | 2.408                 | 5.62 ± 0.03 | 11.083    | 4.96 ± 0.26 | 3.114                 | 5.51 ± 0.08 | 8.913     | 5.05 ± 0.12 |
| B-121    | 2.249                 | 5.65 ± 0.02 | 6.131     | 5.21 ± 0.25 | 3.861                 | 5.41 ± 0.05 | 11.049    | 4.96 ± 0.01 |
| B-122    | 4.140                 | 5.38 ± 0.01 | 9.381     | 5.03 ± 0.26 | 5.329                 | 5.27 ± 0.01 | 9.924     | 5.00 ± 0.04 |
| B-123    | 0.925                 | 6.03 ± 0.04 | 5.395     | 5.27 ± 0.27 | 1.240                 | 5.91 ± 0.04 | 3.744     | 5.43 ± 0.12 |
| B-124    | 1.731                 | 5.76 ± 0.03 | 8.154     | 5.09 ± 0.28 | 1.672                 | 5.78 ± 0.05 | 10.312    | 4.99 ± 0.02 |
| B-125    | 13.999                | 4.85 ± 0.09 | 11.347    | 4.95 ± 0.17 | 13.386                | 4.87 ± 0.09 | 17.512    | 4.76 ± 0.04 |
| B-126    | 4.834                 | 5.32 ± 0.03 | 15.298    | 4.82 ± 0.09 | 7.943                 | 5.10 ± 0.08 | 16.469    | 4.78 ± 0.05 |
| B-127    | 0.315                 | 6.50 ± 0.12 | 2.602     | 5.58 ± 0.22 | 1.148                 | 5.94 ± 0.05 | 4.365     | 5.36 ± 0.26 |
| B-128    | 0.192                 | 6.72 ± 0.04 | 3.342     | 5.48 ± 0.11 | 0.676                 | 6.17 ± 0.08 | 7.762     | 5.11 ± 0.25 |
| B-129    | 0.159                 | 6.80 ± 0.06 | 0.454     | 6.34 ± 0.08 | 0.383                 | 6.42 ± 0.08 | 1.502     | 5.82 ± 0.29 |
| B-130    | 0.109                 | 6.96 ± 0.11 | 1.447     | 5.84 ± 0.29 | 0.242                 | 6.62 ± 0.33 | 1.380     | 5.86 ± 0.19 |
| B-131    | 0.167                 | 6.78 ± 0.10 | 1.749     | 5.76 ± 0.11 | 0.331                 | 6.48 ± 0.11 | 1.725     | 5.76 ± 0.15 |
| B-132    | 8.792                 | 5.06 ± 0.15 | 10.045    | 5.00 ± 0.23 | 7.586                 | 5.12 ± 0.14 | 13.490    | 4.87 ± 0.09 |
| B-133    | 2.074                 | 5.68 ± 0.08 | 9.094     | 5.04 ± 0.23 | 3.337                 | 5.48 ± 0.08 | 10.391    | 4.98 ± 0.00 |
| B-134    | 0.217                 | 6.66 ± 0.09 | 1.636     | 5.79 ± 0.11 | 0.251                 | 6.60 ± 0.12 | 1.920     | 5.72 ± 0.10 |

**Table S2. Activity of 5-NI compounds against *Giardia lamblia***

| Compound | <i>G. lamblia</i> 713 |             |           |             | <i>G. lamblia</i> 106 |             |           |             |
|----------|-----------------------|-------------|-----------|-------------|-----------------------|-------------|-----------|-------------|
|          | MzS                   |             | MzR       |             | MzS                   |             | MzR       |             |
|          | EC50 (μM)             | pEC50       | EC50 (μM) | pEC50       | EC50 (μM)             | pEC50       | EC50 (μM) | pEC50       |
| B-135    | 0.306                 | 6.51 ± 0.08 | 2.530     | 5.60 ± 0.17 | 0.607                 | 6.22 ± 0.08 | 1.920     | 5.72 ± 0.14 |
| B-136    | 1.119                 | 5.95 ± 0.08 | 5.089     | 5.29 ± 0.10 | 1.380                 | 5.86 ± 0.10 | 1.920     | 5.72 ± 0.27 |
| B-137    | 1.680                 | 5.77 ± 0.06 | 4.380     | 5.36 ± 0.17 | 2.733                 | 5.56 ± 0.08 | 11.659    | 4.93 ± 0.04 |
| B-138    | 0.164                 | 6.78 ± 0.07 | 2.994     | 5.52 ± 0.07 | 0.482                 | 6.32 ± 0.05 | 1.806     | 5.74 ± 0.11 |
| B-139    | 0.318                 | 6.50 ± 0.10 | 3.743     | 5.43 ± 0.05 | 0.747                 | 6.13 ± 0.11 | 3.286     | 5.48 ± 0.15 |
| B-140    | 2.015                 | 5.70 ± 0.05 | 1.344     | 5.87 ± 0.40 | 0.759                 | 6.12 ± 0.30 | 6.918     | 5.16 ± 0.20 |
| B-141    | 0.562                 | 6.25 ± 0.12 | 2.554     | 5.59 ± 0.13 | 1.266                 | 5.90 ± 0.05 | 4.713     | 5.33 ± 0.21 |
| B-142    | 8.411                 | 5.08 ± 0.02 | 11.217    | 4.95 ± 0.01 | 5.991                 | 5.22 ± 0.14 | 14.125    | 4.85 ± 0.08 |
| B-143    | 0.869                 | 6.06 ± 0.07 | 6.448     | 5.19 ± 0.03 | 1.357                 | 5.87 ± 0.03 | 10.798    | 4.97 ± 0.13 |
| B-144    | 4.834                 | 5.32 ± 0.03 | 13.999    | 4.85 ± 0.06 | 4.721                 | 5.33 ± 0.17 | 17.113    | 4.77 ± 0.06 |
| B-145    | 0.345                 | 6.46 ± 0.09 | 2.500     | 5.60 ± 0.03 | 0.102                 | 6.99 ± 0.00 | 5.559     | 5.26 ± 0.28 |
| B-146    | 0.513                 | 6.29 ± 0.14 | 3.014     | 5.52 ± 0.09 | 0.432                 | 6.37 ± 0.34 | 3.913     | 5.41 ± 0.39 |
| B-147    | 1.059                 | 5.98 ± 0.11 | 1.755     | 5.76 ± 0.12 | 3.020                 | 5.52 ± 0.21 | 11.156    | 4.95 ± 0.17 |
| B-148    | 0.076                 | 7.12 ± 0.09 | 1.692     | 5.77 ± 0.18 | 0.733                 | 6.14 ± 0.04 | 4.266     | 5.37 ± 0.28 |
| B-149    | 0.618                 | 6.21 ± 0.10 | 3.241     | 5.49 ± 0.15 | 3.508                 | 5.46 ± 0.21 | 7.456     | 5.13 ± 0.19 |
| B-150    | 0.321                 | 6.49 ± 0.35 | 3.365     | 5.47 ± 0.29 | 0.977                 | 6.01 ± 0.67 | 8.511     | 5.07 ± 0.16 |
| B-151    | 0.858                 | 6.07 ± 0.32 | 3.448     | 5.46 ± 0.16 | 5.559                 | 5.26 ± 0.33 | 2.630     | 5.58 ± 0.34 |
| B-152    | 0.137                 | 6.86 ± 0.07 | 4.284     | 5.37 ± 0.09 | 0.158                 | 6.80 ± 0.33 | 1.928     | 5.72 ± 0.40 |
| B-153    | 0.488                 | 6.31 ± 0.45 | 4.913     | 5.31 ± 0.10 | 2.042                 | 5.69 ± 0.70 | 12.162    | 4.92 ± 0.08 |
| B-154    | 0.822                 | 6.09 ± 0.21 | 10.266    | 4.99 ± 0.05 | 4.571                 | 5.34 ± 0.27 | 11.817    | 4.93 ± 0.10 |
| B-155    | 0.114                 | 6.95 ± 0.10 | 4.326     | 5.36 ± 0.04 | 0.240                 | 6.62 ± 0.28 | 1.496     | 5.83 ± 0.39 |
| B-156    | 0.105                 | 6.98 ± 0.17 | 5.454     | 5.26 ± 0.16 | 0.462                 | 6.34 ± 0.16 | 3.311     | 5.48 ± 0.31 |
| B-157    | 0.533                 | 6.27 ± 0.19 | 6.448     | 5.19 ± 0.12 | 0.097                 | 7.02 ± 0.61 | 3.780     | 5.42 ± 0.33 |
| B-158    | 0.549                 | 6.26 ± 0.07 | 7.045     | 5.15 ± 0.09 | 0.750                 | 6.13 ± 0.04 | 6.060     | 5.22 ± 0.17 |
| B-159    | 2.305                 | 5.64 ± 0.04 | 11.217    | 4.95 ± 0.02 | 2.291                 | 5.64 ± 0.04 | 11.482    | 4.94 ± 0.09 |
| B-160    | 12.531                | 4.90 ± 0.10 | 14.633    | 4.83 ± 0.08 | 6.026                 | 5.22 ± 0.24 | 12.957    | 4.89 ± 0.08 |
| B-161    | 0.783                 | 6.11 ± 0.03 | 8.046     | 5.09 ± 0.09 | 0.977                 | 6.01 ± 0.01 | 8.561     | 5.07 ± 0.13 |
| B-162    | 2.489                 | 5.60 ± 0.06 | 10.275    | 4.99 ± 0.02 | 3.273                 | 5.49 ± 0.08 | 10.116    | 5.00 ± 0.12 |
| B-163    | 0.151                 | 6.82 ± 0.14 | 3.034     | 5.52 ± 0.23 | 0.184                 | 6.74 ± 0.00 | 2.113     | 5.68 ± 0.37 |
| C-101    | 0.782                 | 6.11 ± 0.08 | 10.266    | 4.99 ± 0.07 | 1.600                 | 5.80 ± 0.08 | 11.324    | 4.95 ± 0.10 |
| C-102    | 1.300                 | 5.89 ± 0.09 | 10.972    | 4.96 ± 0.05 | 1.711                 | 5.77 ± 0.10 | 8.750     | 5.06 ± 0.09 |
| C-103    | 0.262                 | 6.58 ± 0.04 | 2.320     | 5.63 ± 0.02 | 0.457                 | 6.34 ± 0.05 | 4.966     | 5.30 ± 0.13 |
| C-104    | 1.159                 | 5.94 ± 0.10 | 13.999    | 4.85 ± 0.08 | 2.256                 | 5.65 ± 0.05 | 13.490    | 4.87 ± 0.07 |
| C-105    | 2.709                 | 5.57 ± 0.04 | 13.099    | 4.88 ± 0.03 | 4.936                 | 5.31 ± 0.14 | 14.791    | 4.83 ± 0.06 |
| C-106    | 3.674                 | 5.43 ± 0.07 | 11.469    | 4.94 ± 0.03 | 3.773                 | 5.42 ± 0.10 | 14.454    | 4.84 ± 0.06 |
| C-107    | 1.226                 | 5.91 ± 0.03 | 5.053     | 5.30 ± 0.15 | 1.561                 | 5.81 ± 0.09 | 9.333     | 5.03 ± 0.03 |
| C-108    | 2.676                 | 5.57 ± 0.03 | 10.972    | 4.96 ± 0.03 | 2.775                 | 5.56 ± 0.20 | 10.233    | 4.99 ± 0.06 |
| C-109    | 2.799                 | 5.55 ± 0.02 | 13.999    | 4.85 ± 0.08 | 4.201                 | 5.38 ± 0.12 | 11.482    | 4.94 ± 0.03 |
| C-110    | 1.933                 | 5.71 ± 0.09 | 10.972    | 4.96 ± 0.03 | 3.067                 | 5.51 ± 0.07 | 10.881    | 4.96 ± 0.04 |
| C-111    | 1.019                 | 5.99 ± 0.06 | 10.041    | 5.00 ± 0.07 | 1.269                 | 5.90 ± 0.06 | 8.710     | 5.06 ± 0.07 |
| C-112    | 1.005                 | 6.00 ± 0.09 | 7.045     | 5.15 ± 0.12 | 0.926                 | 6.03 ± 0.15 | 7.703     | 5.11 ± 0.08 |
| C-113    | 0.411                 | 6.39 ± 0.04 | 4.325     | 5.36 ± 0.16 | 0.509                 | 6.29 ± 0.06 | 4.266     | 5.37 ± 0.06 |
| C-114    | 0.955                 | 6.02 ± 0.08 | 10.496    | 4.98 ± 0.08 | 1.876                 | 5.73 ± 0.05 | 9.550     | 5.02 ± 0.06 |
| C-115    | 1.267                 | 5.90 ± 0.06 | 8.411     | 5.08 ± 0.07 | 2.551                 | 5.59 ± 0.04 | 9.924     | 5.00 ± 0.04 |
| C-116    | 0.592                 | 6.23 ± 0.04 | 9.396     | 5.03 ± 0.07 | 0.825                 | 6.08 ± 0.09 | 8.777     | 5.06 ± 0.08 |
| C-117    | 0.072                 | 7.14 ± 0.09 | 1.661     | 5.78 ± 0.09 | 1.950                 | 5.71 ± 0.11 | 10.965    | 4.96 ± 0.04 |
| C-118    | 0.106                 | 6.97 ± 0.03 | 10.731    | 4.97 ± 0.09 | 0.240                 | 6.62 ± 0.11 | 1.413     | 5.85 ± 0.18 |
| C-119    | 0.647                 | 6.19 ± 0.08 | 10.731    | 4.97 ± 0.09 | 0.926                 | 6.03 ± 0.09 | 9.772     | 5.01 ± 0.06 |
| C-120    | 1.795                 | 5.75 ± 0.13 | 12.257    | 4.91 ± 0.08 | 2.951                 | 5.53 ± 0.03 | 13.568    | 4.87 ± 0.06 |

**Table S2. Activity of 5-NI compounds against *Giardia lamblia***

| Compound | <i>G. lamblia</i> 713 |             |           |             | <i>G. lamblia</i> 106 |             |           |             |
|----------|-----------------------|-------------|-----------|-------------|-----------------------|-------------|-----------|-------------|
|          | MzS                   |             | MzR       |             | MzS                   |             | MzR       |             |
|          | EC50 (μM)             | pEC50       | EC50 (μM) | pEC50       | EC50 (μM)             | pEC50       | EC50 (μM) | pEC50       |
| C-121    | 1.337                 | 5.87 ± 0.02 | 11.725    | 4.93 ± 0.11 | 1.359                 | 5.87 ± 0.05 | 12.445    | 4.91 ± 0.07 |
| C-122    | 1.875                 | 5.73 ± 0.08 | 6.306     | 5.20 ± 0.23 | 2.840                 | 5.55 ± 0.20 | 11.049    | 4.96 ± 0.00 |
| C-123    | 0.565                 | 6.25 ± 0.04 | 10.266    | 4.99 ± 0.22 | 0.697                 | 6.16 ± 0.07 | 5.754     | 5.24 ± 0.15 |
| C-124    | 2.123                 | 5.67 ± 0.07 | 9.821     | 5.01 ± 0.12 | 2.089                 | 5.68 ± 0.10 | 11.049    | 4.96 ± 0.00 |
| C-125    | 4.081                 | 5.39 ± 0.10 | 11.469    | 4.94 ± 0.01 | 4.201                 | 5.38 ± 0.11 | 13.698    | 4.86 ± 0.08 |
| C-126    | 2.210                 | 5.66 ± 0.04 | 14.633    | 4.83 ± 0.08 | 0.917                 | 6.04 ± 0.11 | 12.115    | 4.92 ± 0.04 |
| C-127    | 0.165                 | 6.78 ± 0.06 | 6.168     | 5.21 ± 0.14 | 0.414                 | 6.38 ± 0.38 | 6.761     | 5.17 ± 0.18 |
| C-128    | 0.986                 | 6.01 ± 0.02 | 5.167     | 5.29 ± 0.14 | 2.317                 | 5.64 ± 0.08 | 13.284    | 4.88 ± 0.04 |
| C-129    | 0.366                 | 6.44 ± 0.08 | 7.870     | 5.10 ± 0.21 | 1.404                 | 5.85 ± 0.13 | 10.715    | 4.97 ± 0.01 |
| C-130    | 0.054                 | 7.27 ± 0.10 | 1.843     | 5.73 ± 0.10 | 0.051                 | 7.30 ± 0.14 | 0.898     | 6.05 ± 0.04 |
| C-131    | 0.178                 | 6.75 ± 0.05 | 3.514     | 5.45 ± 0.11 | 0.176                 | 6.76 ± 0.15 | 2.493     | 5.60 ± 0.06 |
| C-132    | 4.313                 | 5.37 ± 0.10 | 8.792     | 5.06 ± 0.26 | 3.569                 | 5.45 ± 0.08 | 11.134    | 4.95 ± 0.00 |
| C-133    | 1.369                 | 5.86 ± 0.04 | 12.531    | 4.90 ± 0.10 | 0.970                 | 6.01 ± 0.10 | 11.817    | 4.93 ± 0.08 |
| C-134    | 0.286                 | 6.54 ± 0.08 | 6.448     | 5.19 ± 0.16 | 0.407                 | 6.39 ± 0.13 | 6.998     | 5.16 ± 0.10 |
| C-135    | 0.359                 | 6.45 ± 0.07 | 5.522     | 5.26 ± 0.16 | 0.427                 | 6.37 ± 0.13 | 4.365     | 5.36 ± 0.14 |
| C-136    | 0.866                 | 6.06 ± 0.07 | 10.041    | 5.00 ± 0.11 | 1.175                 | 5.93 ± 0.08 | 8.861     | 5.05 ± 0.13 |
| C-137    | 0.160                 | 6.80 ± 0.06 | 2.466     | 5.61 ± 0.17 | 0.206                 | 6.69 ± 0.31 | 2.974     | 5.53 ± 0.07 |
| C-138    | 0.264                 | 6.58 ± 0.14 | 8.912     | 5.05 ± 0.05 | 0.733                 | 6.14 ± 0.04 | 8.861     | 5.05 ± 0.14 |
| C-139    | 0.368                 | 6.43 ± 0.17 | 10.972    | 4.96 ± 0.11 | 1.834                 | 5.74 ± 0.52 | 7.718     | 5.11 ± 0.18 |
| C-140    | 0.441                 | 6.36 ± 0.17 | 7.203     | 5.14 ± 0.13 | 0.447                 | 6.35 ± 0.04 | 8.241     | 5.08 ± 0.20 |
| C-141    | 0.190                 | 6.72 ± 0.03 | 6.741     | 5.17 ± 0.05 | 0.304                 | 6.52 ± 0.06 | 5.129     | 5.29 ± 0.19 |
| C-142    | 0.860                 | 6.07 ± 0.05 | 10.972    | 4.96 ± 0.04 | 2.018                 | 5.70 ± 0.09 | 12.209    | 4.91 ± 0.06 |
| C-143    | 1.428                 | 5.85 ± 0.10 | 11.217    | 4.95 ± 0.03 | 0.665                 | 6.18 ± 0.08 | 6.166     | 5.21 ± 0.04 |
| C-144    | 0.555                 | 6.26 ± 0.04 | 11.708    | 4.93 ± 0.19 | 3.236                 | 5.49 ± 0.07 | 13.804    | 4.86 ± 0.08 |
| C-145    | 0.646                 | 6.19 ± 0.11 | 5.096     | 5.29 ± 0.21 | 0.697                 | 6.16 ± 0.08 | 7.447     | 5.13 ± 0.13 |
| C-146    | 0.598                 | 6.22 ± 0.32 | 10.812    | 4.97 ± 0.01 | 1.370                 | 5.86 ± 0.26 | 12.589    | 4.90 ± 0.05 |
| C-147    | 0.323                 | 6.49 ± 0.22 | 7.533     | 5.12 ± 0.12 | 1.189                 | 5.93 ± 0.18 | 10.593    | 4.98 ± 0.11 |
| C-148    | 0.499                 | 6.30 ± 0.13 | 4.325     | 5.36 ± 0.12 | 0.167                 | 6.78 ± 0.18 | 3.532     | 5.45 ± 0.19 |
| C-149    | 0.454                 | 6.34 ± 0.30 | 9.912     | 5.00 ± 0.06 | 1.413                 | 5.85 ± 0.09 | 9.661     | 5.02 ± 0.11 |
| C-150    | 0.281                 | 6.55 ± 0.38 | 7.698     | 5.11 ± 0.02 | 3.548                 | 5.45 ± 0.14 | 11.695    | 4.93 ± 0.09 |
| C-151    | 0.751                 | 6.12 ± 0.30 | 5.645     | 5.25 ± 0.14 | 0.088                 | 7.06 ± 0.59 | 3.487     | 5.46 ± 0.40 |
| C-152    | 1.930                 | 5.71 ± 0.13 | 6.592     | 5.18 ± 0.18 | 0.776                 | 6.11 ± 0.18 | 8.318     | 5.08 ± 0.15 |
| C-153    | 2.309                 | 5.64 ± 0.03 | 3.961     | 5.40 ± 0.35 | 1.567                 | 5.81 ± 0.02 | 8.643     | 5.06 ± 0.04 |
| C-154    | 1.980                 | 5.70 ± 0.07 | 9.821     | 5.01 ± 0.08 | 3.187                 | 5.50 ± 0.04 | 11.749    | 4.93 ± 0.04 |
| C-155    | 0.359                 | 6.45 ± 0.01 | 5.019     | 5.30 ± 0.11 | 0.145                 | 6.84 ± 0.05 | 1.514     | 5.82 ± 0.19 |
| C-156    | 0.416                 | 6.38 ± 0.07 | 8.411     | 5.08 ± 0.09 | 0.267                 | 6.57 ± 0.07 | 4.365     | 5.36 ± 0.21 |
| C-157    | 0.414                 | 6.38 ± 0.06 | 5.734     | 5.24 ± 0.14 | 1.012                 | 6.00 ± 0.02 | 8.643     | 5.06 ± 0.09 |
| C-158    | 0.109                 | 6.96 ± 0.05 | 5.772     | 5.24 ± 0.29 | 0.919                 | 6.04 ± 0.08 | 8.191     | 5.09 ± 0.06 |
| C-159    | 1.473                 | 5.83 ± 0.15 | 11.315    | 4.95 ± 0.05 | 1.950                 | 5.71 ± 0.05 | 9.624     | 5.02 ± 0.04 |
| C-160    | 7.328                 | 5.14 ± 0.20 | 14.312    | 4.84 ± 0.06 | 3.138                 | 5.50 ± 0.09 | 11.570    | 4.94 ± 0.04 |
| C-161    | 0.741                 | 6.13 ± 0.07 | 11.988    | 4.92 ± 0.01 | 1.166                 | 5.93 ± 0.01 | 8.066     | 5.09 ± 0.10 |
| C-162    | 1.916                 | 5.72 ± 0.08 | 12.257    | 4.91 ± 0.11 | 2.570                 | 5.59 ± 0.02 | 13.996    | 4.85 ± 0.06 |
| C-163    | 0.302                 | 6.52 ± 0.07 | 5.901     | 5.23 ± 0.01 | 0.368                 | 6.43 ± 0.15 | 5.781     | 5.24 ± 0.19 |
| D-101    | 15.565                | 4.81 ± 0.11 | 14.199    | 4.85 ± 0.08 | 11.659                | 4.93 ± 0.13 | 11.885    | 4.93 ± 0.01 |
| D-102    | 16.089                | 4.79 ± 0.09 | 12.850    | 4.89 ± 0.10 | 10.312                | 4.99 ± 0.17 | 12.882    | 4.89 ± 0.06 |
| D-103    | 9.620                 | 5.02 ± 0.06 | >20       | <4.70       | 7.528                 | 5.12 ± 0.09 | 16.724    | 4.78 ± 0.03 |
| D-104    | 12.142                | 4.92 ± 0.22 | 14.171    | 4.85 ± 0.08 | 9.190                 | 5.04 ± 0.22 | 11.049    | 4.96 ± 0.01 |
| D-105    | 19.091                | 4.72 ± 0.02 | 15.825    | 4.80 ± 0.05 | 11.570                | 4.94 ± 0.13 | 12.589    | 4.90 ± 0.02 |
| D-106    | >20                   | <4.70       | 17.096    | 4.77 ± 0.06 | 11.307                | 4.95 ± 0.14 | 12.686    | 4.90 ± 0.02 |

**Table S2. Activity of 5-NI compounds against *Giardia lamblia***

| Compound | <i>G. lamblia</i> 713 |             |           |             | <i>G. lamblia</i> 106 |             |           |             |
|----------|-----------------------|-------------|-----------|-------------|-----------------------|-------------|-----------|-------------|
|          | MzS                   |             | MzR       |             | MzS                   |             | MzR       |             |
|          | EC50 (μM)             | pEC50       | EC50 (μM) | pEC50       | EC50 (μM)             | pEC50       | EC50 (μM) | pEC50       |
| D-107    | 12.683                | 4.90 ± 0.02 | 13.410    | 4.87 ± 0.09 | 10.155                | 4.99 ± 0.18 | 11.570    | 4.94 ± 0.03 |
| D-108    | 12.826                | 4.89 ± 0.03 | 11.364    | 4.94 ± 0.14 | 8.511                 | 5.07 ± 0.13 | 10.312    | 4.99 ± 0.03 |
| D-109    | 13.257                | 4.88 ± 0.04 | 13.709    | 4.86 ± 0.08 | 10.532                | 4.98 ± 0.12 | 11.885    | 4.93 ± 0.02 |
| D-110    | 12.135                | 4.92 ± 0.01 | 13.861    | 4.86 ± 0.08 | 10.058                | 5.00 ± 0.14 | 12.809    | 4.89 ± 0.06 |
| D-111    | 5.911                 | 5.23 ± 0.21 | 12.413    | 4.91 ± 0.10 | 11.416                | 4.94 ± 0.09 | 12.209    | 4.91 ± 0.01 |
| D-112    | 10.166                | 4.99 ± 0.04 | 12.551    | 4.90 ± 0.10 | 10.715                | 4.97 ± 0.11 | 11.885    | 4.93 ± 0.02 |
| D-113    | 4.884                 | 5.31 ± 0.16 | 12.795    | 4.89 ± 0.10 | 7.470                 | 5.13 ± 0.10 | 15.136    | 4.82 ± 0.06 |
| D-114    | 10.626                | 4.97 ± 0.04 | 13.861    | 4.86 ± 0.08 | 12.023                | 4.92 ± 0.07 | 17.113    | 4.77 ± 0.07 |
| D-115    | 10.861                | 4.96 ± 0.10 | 12.973    | 4.89 ± 0.09 | 11.092                | 4.96 ± 0.10 | 12.686    | 4.90 ± 0.01 |
| D-116    | 12.135                | 4.92 ± 0.03 | 14.688    | 4.83 ± 0.05 | 10.593                | 4.98 ± 0.11 | 12.784    | 4.89 ± 0.04 |
| D-117    | 9.201                 | 5.04 ± 0.09 | 17.585    | 4.75 ± 0.03 | 11.134                | 4.95 ± 0.15 | 12.882    | 4.89 ± 0.04 |
| D-118    | 7.306                 | 5.14 ± 0.04 | 18.829    | 4.73 ± 0.03 | 5.980                 | 5.22 ± 0.13 | 18.197    | 4.74 ± 0.04 |
| D-119    | 10.393                | 4.98 ± 0.05 | 12.866    | 4.89 ± 0.08 | 12.686                | 4.90 ± 0.10 | 14.791    | 4.83 ± 0.05 |
| D-120    | 11.870                | 4.93 ± 0.00 | >20       | <4.70       | 8.710                 | 5.06 ± 0.23 | 7.852     | 5.11 ± 0.09 |
| D-121    | 8.805                 | 5.06 ± 0.07 | 14.567    | 4.84 ± 0.14 | 10.715                | 4.97 ± 0.01 | 4.416     | 5.36 ± 0.03 |
| D-122    | 11.109                | 4.95 ± 0.02 | 17.769    | 4.75 ± 0.05 | 10.233                | 4.99 ± 0.18 | 10.471    | 4.98 ± 0.04 |
| D-123    | 1.098                 | 5.96 ± 0.12 | 6.587     | 5.18 ± 0.08 | 2.493                 | 5.60 ± 0.09 | 4.898     | 5.31 ± 0.06 |
| D-124    | 12.005                | 4.92 ± 0.06 | 17.477    | 4.76 ± 0.06 | 9.050                 | 5.04 ± 0.21 | 9.120     | 5.04 ± 0.06 |
| D-125    | 13.263                | 4.88 ± 0.09 | 15.058    | 4.82 ± 0.08 | 9.404                 | 5.03 ± 0.22 | 10.552    | 4.98 ± 0.01 |
| D-126    | 16.722                | 4.78 ± 0.07 | 16.908    | 4.77 ± 0.06 | 8.511                 | 5.07 ± 0.26 | 11.839    | 4.93 ± 0.07 |
| D-127    | 6.776                 | 5.17 ± 0.09 | 13.977    | 4.85 ± 0.09 | 10.798                | 4.97 ± 0.15 | 11.220    | 4.95 ± 0.02 |
| D-128    | 7.136                 | 5.15 ± 0.15 | 17.049    | 4.77 ± 0.07 | 10.552                | 4.98 ± 0.18 | 12.303    | 4.91 ± 0.06 |
| D-129    | 14.328                | 4.84 ± 0.08 | 15.183    | 4.82 ± 0.12 | 11.839                | 4.93 ± 0.23 | 13.183    | 4.88 ± 0.09 |
| D-130    | 3.836                 | 5.42 ± 0.13 | 14.688    | 4.83 ± 0.08 | 14.125                | 4.85 ± 0.09 | 17.783    | 4.75 ± 0.05 |
| D-131    | 4.838                 | 5.32 ± 0.17 | 15.694    | 4.80 ± 0.06 | 6.119                 | 5.21 ± 0.04 | 12.493    | 4.90 ± 0.10 |
| D-132    | 14.487                | 4.84 ± 0.08 | 16.539    | 4.78 ± 0.08 | 11.134                | 4.95 ± 0.15 | 11.134    | 4.95 ± 0.02 |
| D-133    | 14.487                | 4.84 ± 0.08 | 16.357    | 4.79 ± 0.09 | 13.183                | 4.88 ± 0.09 | 11.749    | 4.93 ± 0.03 |
| D-134    | 13.268                | 4.88 ± 0.06 | >20       | <4.70       | 10.312                | 4.99 ± 0.12 | 14.622    | 4.84 ± 0.14 |
| D-135    | 2.401                 | 5.62 ± 0.12 | 16.539    | 4.78 ± 0.07 | 4.169                 | 5.38 ± 0.04 | 11.350    | 4.95 ± 0.02 |
| D-136    | 14.642                | 4.83 ± 0.07 | 18.266    | 4.74 ± 0.04 | 13.386                | 4.87 ± 0.08 | 11.659    | 4.93 ± 0.02 |
| D-137    | 8.435                 | 5.07 ± 0.04 | >20       | <4.70       | 9.226                 | 5.04 ± 0.07 | 14.706    | 4.83 ± 0.05 |
| D-138    | 11.482                | 4.94 ± 0.02 | 17.477    | 4.76 ± 0.06 | 9.624                 | 5.02 ± 0.09 | 11.614    | 4.94 ± 0.01 |
| D-139    | 11.484                | 4.94 ± 0.02 | 17.671    | 4.75 ± 0.05 | 12.397                | 4.91 ± 0.05 | 10.965    | 4.96 ± 0.01 |
| D-140    | 5.655                 | 5.25 ± 0.12 | >20       | <4.70       | 8.318                 | 5.08 ± 0.10 | 13.490    | 4.87 ± 0.09 |
| D-141    | 7.498                 | 5.13 ± 0.07 | 16.908    | 4.77 ± 0.07 | 5.667                 | 5.25 ± 0.11 | 9.550     | 5.02 ± 0.03 |
| D-142    | 6.760                 | 5.17 ± 0.20 | 17.096    | 4.77 ± 0.07 | 3.631                 | 5.44 ± 0.24 | 5.289     | 5.28 ± 0.17 |
| D-143    | 10.512                | 4.98 ± 0.01 | 17.096    | 4.77 ± 0.07 | 3.861                 | 5.41 ± 0.29 | 6.506     | 5.19 ± 0.13 |
| D-144    | 11.232                | 4.95 ± 0.01 | 15.825    | 4.80 ± 0.07 | 8.066                 | 5.09 ± 0.17 | 15.136    | 4.82 ± 0.05 |
| D-145    | 1.786                 | 5.75 ± 0.10 | 14.810    | 4.83 ± 0.02 | 5.412                 | 5.27 ± 0.08 | 12.589    | 4.90 ± 0.07 |
| D-146    | 5.929                 | 5.23 ± 0.19 | 17.477    | 4.76 ± 0.06 | 5.667                 | 5.25 ± 0.28 | 6.658     | 5.18 ± 0.21 |
| D-147    | 2.386                 | 5.62 ± 0.30 | 15.651    | 4.81 ± 0.08 | 3.521                 | 5.45 ± 0.27 | 11.659    | 4.93 ± 0.13 |
| D-148    | 7.625                 | 5.12 ± 0.11 | >20       | <4.70       | 7.413                 | 5.13 ± 0.17 | 12.303    | 4.91 ± 0.13 |
| D-149    | 7.794                 | 5.11 ± 0.14 | >20       | <4.70       | 7.079                 | 5.15 ± 0.17 | 12.023    | 4.92 ± 0.07 |
| D-150    | 3.265                 | 5.49 ± 0.16 | 18.674    | 4.73 ± 0.03 | 5.934                 | 5.23 ± 0.25 | 10.633    | 4.97 ± 0.02 |
| D-151    | 9.732                 | 5.01 ± 0.07 | 18.469    | 4.73 ± 0.03 | 6.865                 | 5.16 ± 0.21 | 10.312    | 4.99 ± 0.01 |
| D-152    | 5.202                 | 5.28 ± 0.24 | 17.285    | 4.76 ± 0.03 | 6.761                 | 5.17 ± 0.20 | 10.965    | 4.96 ± 0.02 |
| D-153    | 4.014                 | 5.40 ± 0.16 | 17.671    | 4.75 ± 0.05 | 5.623                 | 5.25 ± 0.28 | 8.004     | 5.10 ± 0.22 |
| D-154    | 8.429                 | 5.07 ± 0.09 | 19.517    | 4.71 ± 0.01 | 7.134                 | 5.15 ± 0.19 | 10.965    | 4.96 ± 0.15 |
| D-155    | 5.488                 | 5.26 ± 0.06 | 19.091    | 4.72 ± 0.02 | 4.233                 | 5.37 ± 0.17 | 10.000    | 5.00 ± 0.06 |

**Table S2. Activity of 5-NI compounds against *Giardia lamblia***

| Compound | <i>G. lamblia</i> 713 |             |           |             | <i>G. lamblia</i> 106 |             |           |             |
|----------|-----------------------|-------------|-----------|-------------|-----------------------|-------------|-----------|-------------|
|          | MzS                   |             | MzR       |             | MzS                   |             | MzR       |             |
|          | EC50 (μM)             | pEC50       | EC50 (μM) | pEC50       | EC50 (μM)             | pEC50       | EC50 (μM) | pEC50       |
| D-156    | 7.259                 | 5.14 ± 0.09 | >20       | <4.70       | 5.934                 | 5.23 ± 0.18 | 10.233    | 4.99 ± 0.05 |
| D-157    | 3.663                 | 5.44 ± 0.04 | >20       | <4.70       | 3.603                 | 5.44 ± 0.15 | 3.715     | 5.43 ± 0.28 |
| D-158    | 11.872                | 4.93 ± 0.04 | >20       | <4.70       | 6.358                 | 5.20 ± 0.22 | 10.000    | 5.00 ± 0.08 |
| D-159    | 11.358                | 4.94 ± 0.02 | >20       | <4.70       | 7.943                 | 5.10 ± 0.14 | 9.261     | 5.03 ± 0.10 |
| D-160    | 11.354                | 4.94 ± 0.04 | >20       | <4.70       | 6.761                 | 5.17 ± 0.20 | 6.972     | 5.16 ± 0.14 |
| D-161    | 9.409                 | 5.03 ± 0.06 | 16.722    | 4.78 ± 0.08 | 5.667                 | 5.25 ± 0.18 | 9.050     | 5.04 ± 0.08 |
| D-162    | 7.969                 | 5.10 ± 0.13 | 17.671    | 4.75 ± 0.05 | 13.183                | 4.88 ± 0.09 | 10.666    | 4.97 ± 0.12 |
| D-163    | >20                   | <4.70       | >20       | <4.70       | 5.580                 | 5.25 ± 0.14 | 14.723    | 4.83 ± 0.06 |
| E-101    | 0.012                 | 7.92 ± 0.37 | 0.293     | 6.53 ± 0.10 | 0.028                 | 7.56 ± 0.03 | 0.401     | 6.40 ± 0.20 |
| E-102    | 0.016                 | 7.80 ± 0.24 | 0.209     | 6.68 ± 0.06 | 0.032                 | 7.50 ± 0.11 | 0.300     | 6.52 ± 0.07 |
| E-103    | 0.043                 | 7.36 ± 0.10 | 0.926     | 6.03 ± 0.10 | 0.231                 | 6.64 ± 0.17 | 0.440     | 6.36 ± 0.05 |
| E-104    | 0.063                 | 7.20 ± 0.02 | 1.585     | 5.80 ± 0.08 | 0.097                 | 7.01 ± 0.11 | 2.934     | 5.53 ± 0.28 |
| E-105    | 0.101                 | 7.00 ± 0.06 | 0.912     | 6.04 ± 0.17 | 0.101                 | 7.00 ± 0.16 | 3.073     | 5.51 ± 0.23 |
| E-106    | 0.098                 | 7.01 ± 0.18 | 1.980     | 5.70 ± 0.13 | 0.137                 | 6.86 ± 0.08 | 2.985     | 5.53 ± 0.21 |
| E-107    | 0.018                 | 7.74 ± 0.16 | 0.404     | 6.39 ± 0.04 | 0.054                 | 7.27 ± 0.09 | 1.245     | 5.91 ± 0.41 |
| E-108    | 0.067                 | 7.18 ± 0.12 | 0.708     | 6.15 ± 0.07 | 0.072                 | 7.14 ± 0.09 | 1.531     | 5.82 ± 0.27 |
| E-109    | 0.070                 | 7.16 ± 0.22 | 1.175     | 5.93 ± 0.07 | 0.110                 | 6.96 ± 0.12 | 2.126     | 5.67 ± 0.20 |
| E-110    | 0.068                 | 7.17 ± 0.23 | 0.819     | 6.09 ± 0.11 | 0.057                 | 7.25 ± 0.04 | 1.047     | 5.98 ± 0.19 |
| E-111    | 0.091                 | 7.04 ± 0.19 | 0.719     | 6.14 ± 0.13 | 0.334                 | 6.48 ± 0.08 | 1.421     | 5.85 ± 0.12 |
| E-112    | 0.019                 | 7.73 ± 0.10 | 0.641     | 6.19 ± 0.05 | 0.043                 | 7.37 ± 0.15 | 0.439     | 6.36 ± 0.17 |
| E-113    | 0.014                 | 7.85 ± 0.14 | 0.200     | 6.70 ± 0.12 | 0.064                 | 7.20 ± 0.18 | 0.501     | 6.30 ± 0.13 |
| E-114    | 0.034                 | 7.47 ± 0.12 | 0.440     | 6.36 ± 0.03 | 0.191                 | 6.72 ± 0.15 | 0.661     | 6.18 ± 0.08 |
| E-115    | 0.061                 | 7.22 ± 0.09 | 0.386     | 6.41 ± 0.08 | 0.185                 | 6.73 ± 0.01 | 0.733     | 6.14 ± 0.07 |
| E-116    | 0.005                 | 8.28 ± 0.28 | 0.207     | 6.68 ± 0.14 | 0.041                 | 7.38 ± 0.09 | 0.992     | 6.00 ± 0.12 |
| E-117    | 0.035                 | 7.45 ± 0.33 | 5.077     | 5.29 ± 0.46 | 0.340                 | 6.47 ± 0.25 | 0.661     | 6.18 ± 0.07 |
| E-118    | 0.024                 | 7.61 ± 0.07 | 0.340     | 6.47 ± 0.19 | 0.046                 | 7.34 ± 0.21 | 1.221     | 5.91 ± 0.21 |
| E-119    | 0.030                 | 7.52 ± 0.13 | 1.063     | 5.97 ± 0.13 | 0.187                 | 6.73 ± 0.17 | 2.570     | 5.59 ± 0.17 |
| E-120    | 0.011                 | 7.94 ± 0.18 | 0.193     | 6.71 ± 0.13 | 0.058                 | 7.24 ± 0.10 | 0.321     | 6.49 ± 0.16 |
| E-121    | 0.007                 | 8.15 ± 0.08 | 0.631     | 6.20 ± 0.00 | 0.086                 | 7.07 ± 0.18 | 0.307     | 6.51 ± 0.17 |
| E-122    | 0.020                 | 7.70 ± 0.08 | 1.000     | 6.00 ± 0.00 | 0.135                 | 6.87 ± 0.13 | 0.651     | 6.19 ± 0.09 |
| E-123    | 0.013                 | 7.87 ± 0.11 | 0.275     | 6.56 ± 0.00 | 0.059                 | 7.23 ± 0.12 | 0.227     | 6.64 ± 0.09 |
| E-124    | 0.447                 | 6.35 ± 0.20 | 3.467     | 5.46 ± 0.00 | 0.596                 | 6.23 ± 0.05 | 3.920     | 5.41 ± 0.12 |
| E-125    | 0.024                 | 7.61 ± 0.10 | 0.440     | 6.36 ± 0.12 | 0.117                 | 6.93 ± 0.17 | 1.505     | 5.82 ± 0.13 |
| E-126    | 0.049                 | 7.31 ± 0.27 | 0.759     | 6.12 ± 0.38 | 0.130                 | 6.89 ± 0.16 | 1.326     | 5.88 ± 0.16 |
| E-127    | 0.143                 | 6.85 ± 0.29 | 1.271     | 5.90 ± 0.30 | 0.104                 | 6.99 ± 0.27 | 0.977     | 6.01 ± 0.22 |
| E-128    | 0.012                 | 7.92 ± 0.14 | 0.374     | 6.43 ± 0.24 | 0.035                 | 7.45 ± 0.04 | 0.084     | 7.07 ± 0.27 |
| E-129    | 0.031                 | 7.51 ± 0.07 | 0.813     | 6.09 ± 0.30 | 0.090                 | 7.05 ± 0.05 | 0.770     | 6.11 ± 0.10 |
| E-130    | 0.024                 | 7.62 ± 0.25 | 0.893     | 6.05 ± 0.18 | 0.279                 | 6.56 ± 0.12 | 1.193     | 5.92 ± 0.24 |
| E-131    | 0.038                 | 7.42 ± 0.23 | 1.277     | 5.89 ± 0.45 | 0.022                 | 7.65 ± 0.21 | 0.259     | 6.59 ± 0.10 |
| E-132    | 0.420                 | 6.38 ± 0.06 | 1.995     | 5.70 ± 0.31 | 2.380                 | 5.62 ± 0.04 | 2.163     | 5.67 ± 0.28 |
| E-133    | 0.035                 | 7.46 ± 0.16 | 0.482     | 6.32 ± 0.28 | 0.132                 | 6.88 ± 0.09 | 1.372     | 5.86 ± 0.24 |
| E-134    | 0.008                 | 8.08 ± 0.25 | 0.258     | 6.59 ± 0.34 | 0.033                 | 7.48 ± 0.30 | 0.109     | 6.96 ± 0.12 |
| E-135    | >20                   | <4.70       | 9.848     | 5.01 ± 0.31 | 0.022                 | 7.66 ± 0.02 | 0.193     | 6.71 ± 0.25 |
| E-136    | 0.007                 | 8.18 ± 0.09 | 0.169     | 6.77 ± 0.20 | 0.027                 | 7.57 ± 0.07 | 0.132     | 6.88 ± 0.17 |
| E-137    | 0.053                 | 7.28 ± 0.30 | 0.603     | 6.22 ± 0.12 | 0.098                 | 7.01 ± 0.12 | 1.522     | 5.82 ± 0.32 |
| E-138    | 0.015                 | 7.82 ± 0.02 | 0.430     | 6.37 ± 0.43 | 0.058                 | 7.24 ± 0.21 | 0.923     | 6.04 ± 0.37 |
| E-139    | 0.010                 | 7.98 ± 0.07 | 0.547     | 6.26 ± 0.39 | 0.088                 | 7.06 ± 0.26 | 1.457     | 5.84 ± 0.26 |
| E-140    | 0.066                 | 7.18 ± 0.06 | 3.039     | 5.52 ± 0.14 | 0.130                 | 6.89 ± 0.26 | 0.567     | 6.25 ± 0.48 |
| E-141    | 0.012                 | 7.92 ± 0.14 | 0.131     | 6.88 ± 0.32 | 0.084                 | 7.08 ± 0.23 | 0.414     | 6.38 ± 0.22 |

**Table S2. Activity of 5-NI compounds against *Giardia lamblia***

| Compound | <i>G. lamblia</i> 713 |             |           |             | <i>G. lamblia</i> 106 |             |           |             |
|----------|-----------------------|-------------|-----------|-------------|-----------------------|-------------|-----------|-------------|
|          | MzS                   |             | MzR       |             | MzS                   |             | MzR       |             |
|          | EC50 (μM)             | pEC50       | EC50 (μM) | pEC50       | EC50 (μM)             | pEC50       | EC50 (μM) | pEC50       |
| E-142    | 0.127                 | 6.90 ± 0.14 | 0.819     | 6.09 ± 0.11 | 0.280                 | 6.55 ± 0.11 | 1.573     | 5.80 ± 0.09 |
| E-143    | 0.006                 | 8.24 ± 0.10 | 0.124     | 6.91 ± 0.06 | 0.018                 | 7.76 ± 0.24 | 0.213     | 6.67 ± 0.19 |
| E-144    | 0.386                 | 6.41 ± 0.27 | 5.741     | 5.24 ± 0.19 | 1.941                 | 5.71 ± 0.11 | 10.654    | 4.97 ± 0.11 |
| E-145    | 0.003                 | 8.53 ± 0.18 | 0.186     | 6.73 ± 0.18 | 0.088                 | 7.06 ± 0.30 | 0.251     | 6.60 ± 0.15 |
| E-146    | 0.024                 | 7.62 ± 0.09 | 1.618     | 5.79 ± 0.55 | 0.088                 | 7.06 ± 0.37 | 0.822     | 6.09 ± 0.50 |
| E-147    | 0.054                 | 7.26 ± 0.04 | 0.196     | 6.71 ± 0.24 | 1.306                 | 5.88 ± 0.09 | 9.829     | 5.01 ± 0.07 |
| E-148    | 0.015                 | 7.84 ± 0.25 | 1.088     | 5.96 ± 0.21 | 0.115                 | 6.94 ± 0.15 | 2.469     | 5.61 ± 0.26 |
| E-149    | 0.014                 | 7.86 ± 0.16 | 0.551     | 6.26 ± 0.23 | 0.035                 | 7.46 ± 0.29 | 0.708     | 6.15 ± 0.52 |
| E-150    | 0.007                 | 8.15 ± 0.04 | 0.346     | 6.46 ± 0.22 | 0.110                 | 6.96 ± 0.15 | 1.437     | 5.84 ± 0.29 |
| E-151    | 0.043                 | 7.37 ± 0.18 | 0.951     | 6.02 ± 0.14 | 0.108                 | 6.97 ± 0.16 | 0.703     | 6.15 ± 0.22 |
| E-152    | 0.201                 | 6.70 ± 0.33 | 4.137     | 5.38 ± 0.27 | 0.695                 | 6.16 ± 0.12 | 4.870     | 5.31 ± 0.20 |
| E-153    | 0.030                 | 7.52 ± 0.16 | 2.400     | 5.62 ± 0.20 | 0.092                 | 7.04 ± 0.05 | 2.493     | 5.60 ± 0.18 |
| E-154    | 0.035                 | 7.46 ± 0.26 | 3.352     | 5.47 ± 0.14 | 0.029                 | 7.54 ± 0.24 | 0.457     | 6.34 ± 0.47 |
| E-155    | 0.006                 | 8.22 ± 0.09 | 0.667     | 6.18 ± 0.27 | 0.105                 | 6.98 ± 0.13 | 0.858     | 6.07 ± 0.30 |
| E-156    | 0.008                 | 8.08 ± 0.11 | 0.774     | 6.11 ± 0.32 | 0.037                 | 7.44 ± 0.13 | 0.713     | 6.15 ± 0.10 |
| E-157    | 0.006                 | 8.20 ± 0.28 | 0.157     | 6.80 ± 0.08 | 0.014                 | 7.86 ± 0.10 | 0.084     | 7.07 ± 0.08 |
| E-158    | 0.005                 | 8.32 ± 0.08 | 0.244     | 6.61 ± 0.12 | 0.039                 | 7.41 ± 0.14 | 0.248     | 6.61 ± 0.14 |
| E-159    | 0.014                 | 7.87 ± 0.15 | 0.251     | 6.60 ± 0.20 | 0.058                 | 7.24 ± 0.08 | 0.465     | 6.33 ± 0.12 |
| E-160    | 0.083                 | 7.08 ± 0.06 | 1.163     | 5.93 ± 0.14 | 0.353                 | 6.45 ± 0.16 | 3.162     | 5.50 ± 0.17 |
| E-161    | 0.007                 | 8.17 ± 0.16 | 0.461     | 6.34 ± 0.14 | 0.073                 | 7.14 ± 0.16 | 0.519     | 6.29 ± 0.13 |
| E-162    | 0.028                 | 7.55 ± 0.22 | 0.401     | 6.40 ± 0.17 | 0.213                 | 6.67 ± 0.14 | 1.895     | 5.72 ± 0.11 |
| E-163    | 0.036                 | 7.45 ± 0.08 | 0.401     | 6.40 ± 0.23 | 0.061                 | 7.22 ± 0.11 | 1.088     | 5.96 ± 0.12 |
| F-101    | 0.651                 | 6.19 ± 0.05 | 2.604     | 5.58 ± 0.13 | 1.404                 | 5.85 ± 0.08 | 6.972     | 5.16 ± 0.10 |
| F-102    | 0.501                 | 6.30 ± 0.09 | 2.929     | 5.53 ± 0.14 | 1.245                 | 5.91 ± 0.09 | 6.166     | 5.21 ± 0.15 |
| F-103    | 0.087                 | 7.06 ± 0.23 | 1.548     | 5.81 ± 0.08 | 0.385                 | 6.41 ± 0.10 | 2.042     | 5.69 ± 0.03 |
| F-104    | 0.947                 | 6.02 ± 0.22 | 3.687     | 5.43 ± 0.16 | 2.380                 | 5.62 ± 0.03 | 10.292    | 4.99 ± 0.03 |
| F-105    | 0.736                 | 6.13 ± 0.12 | 2.203     | 5.66 ± 0.10 | 1.491                 | 5.83 ± 0.06 | 8.270     | 5.08 ± 0.10 |
| F-106    | 1.015                 | 5.99 ± 0.15 | 2.727     | 5.56 ± 0.11 | 3.548                 | 5.45 ± 0.06 | 9.495     | 5.02 ± 0.06 |
| F-107    | 0.593                 | 6.23 ± 0.16 | 3.420     | 5.47 ± 0.09 | 1.328                 | 5.88 ± 0.13 | 7.079     | 5.15 ± 0.09 |
| F-108    | 0.407                 | 6.39 ± 0.24 | 0.955     | 6.02 ± 0.07 | 1.980                 | 5.70 ± 0.16 | 8.175     | 5.09 ± 0.10 |
| F-109    | 0.482                 | 6.32 ± 0.14 | 1.426     | 5.85 ± 0.08 | 0.846                 | 6.07 ± 0.07 | 4.217     | 5.38 ± 0.09 |
| F-110    | 0.215                 | 6.67 ± 0.28 | 1.751     | 5.76 ± 0.12 | 0.753                 | 6.12 ± 0.12 | 3.737     | 5.43 ± 0.06 |
| F-111    | 3.022                 | 5.52 ± 0.10 | 5.208     | 5.28 ± 0.06 | 6.865                 | 5.16 ± 0.13 | 11.092    | 4.96 ± 0.02 |
| F-112    | 0.261                 | 6.58 ± 0.55 | 1.023     | 5.99 ± 0.16 | 0.339                 | 6.47 ± 0.08 | 3.020     | 5.52 ± 0.06 |
| F-113    | 0.351                 | 6.45 ± 0.40 | 1.725     | 5.76 ± 0.08 | 0.617                 | 6.21 ± 0.10 | 3.255     | 5.49 ± 0.10 |
| F-114    | 3.020                 | 5.52 ± 0.13 | 7.586     | 5.12 ± 0.00 | 7.762                 | 5.11 ± 0.12 | 12.303    | 4.91 ± 0.07 |
| F-115    | 0.919                 | 6.04 ± 0.06 | 4.739     | 5.32 ± 0.06 | 2.512                 | 5.60 ± 0.09 | 10.471    | 4.98 ± 0.01 |
| F-116    | 1.493                 | 5.83 ± 0.04 | 3.316     | 5.48 ± 0.01 | 4.467                 | 5.35 ± 0.05 | 3.861     | 5.41 ± 0.14 |
| F-117    | 0.030                 | 7.53 ± 0.22 | 1.138     | 5.94 ± 0.22 | 0.117                 | 6.93 ± 0.28 | 0.268     | 6.57 ± 0.08 |
| F-118    | 0.036                 | 7.45 ± 0.09 | 1.025     | 5.99 ± 0.17 | 0.123                 | 6.91 ± 0.11 | 0.516     | 6.29 ± 0.04 |
| F-119    | 0.724                 | 6.14 ± 0.11 | 5.382     | 5.27 ± 0.20 | 2.291                 | 5.64 ± 0.16 | 4.814     | 5.32 ± 0.12 |
| F-120    | 3.034                 | 5.52 ± 0.06 | 6.105     | 5.21 ± 0.04 | 5.710                 | 5.24 ± 0.20 | 4.169     | 5.38 ± 0.19 |
| F-121    | 1.327                 | 5.88 ± 0.07 | 4.677     | 5.33 ± 0.00 | 3.494                 | 5.46 ± 0.10 | 1.221     | 5.91 ± 0.40 |
| F-122    | 6.607                 | 5.18 ± 0.04 | 3.020     | 5.52 ± 0.00 | 8.643                 | 5.06 ± 0.10 | 6.556     | 5.18 ± 0.11 |
| F-123    | 0.362                 | 6.44 ± 0.18 | 0.759     | 6.12 ± 0.00 | 8.643                 | 5.06 ± 0.07 | 5.843     | 5.23 ± 0.15 |
| F-124    | 0.719                 | 6.14 ± 0.19 | 0.575     | 6.24 ± 0.00 | 10.155                | 4.99 ± 0.03 | 5.538     | 5.26 ± 0.16 |
| F-125    | 2.485                 | 5.60 ± 0.06 | 3.802     | 5.42 ± 0.19 | 6.261                 | 5.20 ± 0.13 | 7.025     | 5.15 ± 0.11 |
| F-126    | 0.898                 | 6.05 ± 0.06 | 3.162     | 5.50 ± 0.09 | 2.138                 | 5.67 ± 0.23 | 6.026     | 5.22 ± 0.11 |
| F-127    | 0.087                 | 7.06 ± 0.15 | 1.568     | 5.80 ± 0.12 | 0.646                 | 6.19 ± 0.10 | 0.569     | 6.25 ± 0.44 |

**Table S2. Activity of 5-NI compounds against *Giardia lamblia***

| Compound | <i>G. lamblia</i> 713 |             |           |             | <i>G. lamblia</i> 106 |             |           |             |
|----------|-----------------------|-------------|-----------|-------------|-----------------------|-------------|-----------|-------------|
|          | MzS                   |             | MzR       |             | MzS                   |             | MzR       |             |
|          | EC50 (μM)             | pEC50       | EC50 (μM) | pEC50       | EC50 (μM)             | pEC50       | EC50 (μM) | pEC50       |
| F-128    | 1.387                 | 5.86 ± 0.25 | 13.067    | 4.88 ± 0.13 | 3.311                 | 5.48 ± 0.28 | 14.706    | 4.83 ± 0.08 |
| F-129    | 0.764                 | 6.12 ± 0.17 | 2.479     | 5.61 ± 0.08 | 5.129                 | 5.29 ± 0.14 | 8.222     | 5.09 ± 0.14 |
| F-130    | 1.071                 | 5.97 ± 0.21 | 8.993     | 5.05 ± 0.15 | 5.176                 | 5.29 ± 0.11 | 13.032    | 4.89 ± 0.03 |
| F-131    | 0.192                 | 6.72 ± 0.11 | 0.701     | 6.15 ± 0.32 | 2.541                 | 5.60 ± 0.30 | 0.808     | 6.09 ± 0.26 |
| F-132    | 2.604                 | 5.58 ± 0.09 | 4.868     | 5.31 ± 0.10 | 8.128                 | 5.09 ± 0.06 | 8.913     | 5.05 ± 0.10 |
| F-133    | 0.646                 | 6.19 ± 0.02 | 1.980     | 5.70 ± 0.11 | 2.011                 | 5.70 ± 0.14 | 6.658     | 5.18 ± 0.26 |
| F-134    | 0.202                 | 6.70 ± 0.18 | 2.165     | 5.66 ± 0.07 | 0.378                 | 6.42 ± 0.41 | 2.163     | 5.67 ± 0.08 |
| F-135    | 1.585                 | 5.80 ± 0.12 | 4.520     | 5.34 ± 0.13 | 1.138                 | 5.94 ± 0.17 | 3.508     | 5.46 ± 0.22 |
| F-136    | 0.509                 | 6.29 ± 0.02 | 2.862     | 5.54 ± 0.08 | 1.597                 | 5.80 ± 0.19 | 2.712     | 5.57 ± 0.29 |
| F-137    | 0.627                 | 6.20 ± 0.17 | 6.905     | 5.16 ± 0.16 | 2.213                 | 5.66 ± 0.25 | 6.645     | 5.18 ± 0.09 |
| F-138    | 0.116                 | 6.94 ± 0.20 | 2.263     | 5.65 ± 0.16 | 0.322                 | 6.49 ± 0.31 | 4.004     | 5.40 ± 0.18 |
| F-139    | 0.060                 | 7.22 ± 0.05 | 1.444     | 5.84 ± 0.08 | 0.203                 | 6.69 ± 0.05 | 0.589     | 6.23 ± 0.20 |
| F-140    | 4.480                 | 5.35 ± 0.11 | 10.862    | 4.96 ± 0.06 | 5.433                 | 5.27 ± 0.14 | 8.318     | 5.08 ± 0.11 |
| F-141    | 0.041                 | 7.39 ± 0.15 | 0.669     | 6.17 ± 0.03 | 0.062                 | 7.21 ± 0.19 | 0.355     | 6.45 ± 0.16 |
| F-142    | 1.122                 | 5.95 ± 0.11 | 4.550     | 5.34 ± 0.08 | 2.256                 | 5.65 ± 0.23 | 4.266     | 5.37 ± 0.20 |
| F-143    | 0.101                 | 7.00 ± 0.14 | 1.259     | 5.90 ± 0.09 | 0.347                 | 6.46 ± 0.05 | 0.529     | 6.28 ± 0.40 |
| F-144    | 1.391                 | 5.86 ± 0.05 | 5.050     | 5.30 ± 0.13 | 2.455                 | 5.61 ± 0.18 | 2.154     | 5.67 ± 0.41 |
| F-145    | 0.825                 | 6.08 ± 0.11 | 3.978     | 5.40 ± 0.10 | 2.906                 | 5.54 ± 0.18 | 2.380     | 5.62 ± 0.48 |
| F-146    | 0.020                 | 7.70 ± 0.09 | 0.215     | 6.67 ± 0.20 | 0.071                 | 7.15 ± 0.34 | 0.316     | 6.50 ± 0.17 |
| F-147    | 0.188                 | 6.73 ± 0.43 | 1.599     | 5.80 ± 0.28 | 4.097                 | 5.39 ± 0.14 | 6.310     | 5.20 ± 0.27 |
| F-148    | 0.022                 | 7.65 ± 0.05 | 0.576     | 6.24 ± 0.15 | 0.100                 | 7.00 ± 0.34 | 0.713     | 6.15 ± 0.14 |
| F-149    | 0.020                 | 7.70 ± 0.05 | 0.621     | 6.21 ± 0.15 | 0.084                 | 7.08 ± 0.26 | 0.440     | 6.36 ± 0.04 |
| F-150    | 0.091                 | 7.04 ± 0.08 | 1.422     | 5.85 ± 0.12 | 0.398                 | 6.40 ± 0.10 | 3.441     | 5.46 ± 0.08 |
| F-151    | 0.381                 | 6.42 ± 0.11 | 3.476     | 5.46 ± 0.09 | 1.157                 | 5.94 ± 0.09 | 5.329     | 5.27 ± 0.12 |
| F-152    | 0.497                 | 6.30 ± 0.13 | 3.342     | 5.48 ± 0.21 | 1.468                 | 5.83 ± 0.29 | 1.080     | 5.97 ± 0.27 |
| F-153    | 0.031                 | 7.51 ± 0.13 | 0.732     | 6.14 ± 0.19 | 0.302                 | 6.52 ± 0.05 | 1.491     | 5.83 ± 0.09 |
| F-154    | 0.057                 | 7.25 ± 0.13 | 0.913     | 6.04 ± 0.18 | 0.174                 | 6.76 ± 0.51 | 0.651     | 6.19 ± 0.55 |
| F-155    | 0.054                 | 7.26 ± 0.14 | 1.145     | 5.94 ± 0.08 | 0.081                 | 7.09 ± 0.11 | 0.636     | 6.20 ± 0.05 |
| F-156    | 0.019                 | 7.73 ± 0.13 | 0.327     | 6.49 ± 0.15 | 0.051                 | 7.29 ± 0.20 | 0.411     | 6.39 ± 0.02 |
| F-157    | 0.040                 | 7.40 ± 0.14 | 1.425     | 5.85 ± 0.12 | 0.060                 | 7.22 ± 0.08 | 0.759     | 6.12 ± 0.16 |
| F-158    | 0.091                 | 7.04 ± 0.06 | 1.080     | 5.97 ± 0.02 | 0.319                 | 6.50 ± 0.08 | 0.324     | 6.49 ± 0.40 |
| F-159    | 1.991                 | 5.70 ± 0.02 | 4.560     | 5.34 ± 0.08 | 4.137                 | 5.38 ± 0.19 | 5.129     | 5.29 ± 0.18 |
| F-160    | 2.491                 | 5.60 ± 0.06 | 8.676     | 5.06 ± 0.18 | 3.715                 | 5.43 ± 0.22 | 3.890     | 5.41 ± 0.22 |
| F-161    | 0.293                 | 6.53 ± 0.09 | 5.667     | 5.25 ± 0.28 | 0.948                 | 6.02 ± 0.03 | 6.131     | 5.21 ± 0.13 |
| F-162    | 1.157                 | 5.94 ± 0.03 | 6.617     | 5.18 ± 0.11 | 3.388                 | 5.47 ± 0.18 | 10.839    | 4.97 ± 0.02 |
| F-163    | 0.094                 | 7.03 ± 0.23 | 1.387     | 5.86 ± 0.18 | 0.178                 | 6.75 ± 0.15 | 1.148     | 5.94 ± 0.04 |

Activity against two Mz-sensitive (MzS) isolates of *G. lamblia*, 713 and 106, and their syngeneic Mz-resistant (MzR) derivative lines, was determined as EC50 (in μM; geometric mean, n=3-6 experiments), the compound concentration that inhibits parasite growth by 50%, and is also shown as negative log10 value of the EC50 (pEC50; mean ± SE, n=3-6 experiments).

**Table S3. Activity of 5-NI compounds against *Trichomonas vaginalis***

| Compound | MzS                    |             |                           |             | MzR                       |             |                         |             |
|----------|------------------------|-------------|---------------------------|-------------|---------------------------|-------------|-------------------------|-------------|
|          | <i>T. vaginalis</i> G3 |             | <i>T. vaginalis</i> F1623 |             | <i>T. vaginalis</i> B7268 |             | <i>T. vaginalis</i> LA1 |             |
|          | EC50 (μM)              | pEC50       | EC50 (μM)                 | pEC50       | EC50 (μM)                 | pEC50       | EC50 (μM)               | pEC50       |
| Mz       | 0.759                  | 6.12 ± 0.02 | 0.468                     | 6.33 ± 0.01 | 5.623                     | 5.25 ± 0.02 | 3.631                   | 5.44 ± 0.02 |
| A-101    | 0.977                  | 6.01 ± 0.15 | 0.846                     | 6.07 ± 0.13 | 4.606                     | 5.34 ± 0.00 | 4.493                   | 5.35 ± 0.14 |
| A-102    | 1.479                  | 5.83 ± 0.00 | 1.122                     | 5.95 ± 0.12 | 4.074                     | 5.39 ± 0.15 | 3.981                   | 5.40 ± 0.29 |
| A-103    | 0.461                  | 6.34 ± 0.46 | 0.065                     | 7.19 ± 0.21 | 2.022                     | 5.69 ± 0.07 | 2.390                   | 5.62 ± 0.18 |
| A-104    | 2.280                  | 5.64 ± 0.31 | 1.090                     | 5.96 ± 0.26 | 13.335                    | 4.88 ± 0.18 | 2.645                   | 5.58 ± 0.45 |
| A-105    | 1.556                  | 5.81 ± 0.17 | 1.266                     | 5.90 ± 0.08 | 3.020                     | 5.52 ± 0.30 | 1.466                   | 5.83 ± 0.26 |
| A-106    | 2.469                  | 5.61 ± 0.21 | 3.073                     | 5.51 ± 0.13 | 6.506                     | 5.19 ± 0.20 | 3.831                   | 5.42 ± 0.39 |
| A-107    | 1.370                  | 5.86 ± 0.27 | 2.615                     | 5.58 ± 0.09 | 2.312                     | 5.64 ± 0.34 | 10.839                  | 4.97 ± 0.27 |
| A-108    | 2.723                  | 5.57 ± 0.27 | 1.303                     | 5.89 ± 0.16 | 3.114                     | 5.51 ± 0.47 | 2.371                   | 5.63 ± 0.35 |
| A-109    | 2.934                  | 5.53 ± 0.22 | 1.576                     | 5.80 ± 0.08 | 4.105                     | 5.39 ± 0.34 | 5.495                   | 5.26 ± 0.56 |
| A-110    | 1.995                  | 5.70 ± 0.27 | 1.365                     | 5.87 ± 0.18 | 5.089                     | 5.29 ± 0.19 | 4.233                   | 5.37 ± 0.39 |
| A-111    | 0.589                  | 6.23 ± 0.56 | 1.421                     | 5.85 ± 0.11 | 1.337                     | 5.87 ± 0.25 | 7.762                   | 5.11 ± 0.41 |
| A-112    | 0.729                  | 6.14 ± 0.19 | 1.059                     | 5.98 ± 0.11 | 1.078                     | 5.97 ± 0.39 | 0.759                   | 6.12 ± 0.40 |
| A-113    | 0.490                  | 6.31 ± 0.09 | 0.546                     | 6.26 ± 0.12 | 1.928                     | 5.72 ± 0.10 | 2.884                   | 5.54 ± 0.12 |
| A-114    | 9.333                  | 5.03 ± 0.02 | 4.786                     | 5.32 ± 0.33 | 10.471                    | 4.98 ± 0.02 | 11.749                  | 4.93 ± 0.23 |
| A-115    | 10.715                 | 4.97 ± 0.00 | 5.721                     | 5.24 ± 0.11 | 3.548                     | 5.45 ± 0.25 | 12.882                  | 4.89 ± 0.19 |
| A-116    | 0.788                  | 6.10 ± 0.28 | 1.245                     | 5.91 ± 0.32 | 2.723                     | 5.57 ± 0.23 | 12.735                  | 4.90 ± 0.20 |
| A-117    | 0.205                  | 6.69 ± 0.20 | 0.045                     | 7.35 ± 0.27 | 0.494                     | 6.31 ± 0.19 | 0.682                   | 6.17 ± 0.18 |
| A-118    | 0.141                  | 6.85 ± 0.17 | 0.414                     | 6.38 ± 0.38 | 1.017                     | 5.99 ± 0.19 | 2.469                   | 5.61 ± 0.34 |
| A-119    | 0.746                  | 6.13 ± 0.36 | 0.638                     | 6.20 ± 0.17 | 3.217                     | 5.49 ± 0.11 | 1.905                   | 5.72 ± 0.43 |
| A-120    | 3.181                  | 5.50 ± 0.24 | 3.508                     | 5.46 ± 0.19 | 6.346                     | 5.20 ± 0.18 | 4.898                   | 5.31 ± 0.00 |
| A-121    | 0.994                  | 6.00 ± 0.17 | 1.349                     | 5.87 ± 0.10 | 1.705                     | 5.77 ± 0.16 | 2.712                   | 5.57 ± 0.25 |
| A-122    | 2.331                  | 5.63 ± 0.25 | 0.716                     | 6.15 ± 0.43 | 3.758                     | 5.43 ± 0.26 | 5.129                   | 5.29 ± 0.00 |
| A-123    | 2.265                  | 5.65 ± 0.26 | 2.661                     | 5.58 ± 0.13 | 3.913                     | 5.41 ± 0.21 | 1.259                   | 5.90 ± 0.22 |
| A-124    | 3.408                  | 5.47 ± 0.18 | 3.758                     | 5.43 ± 0.13 | 3.003                     | 5.52 ± 0.41 | 0.302                   | 6.52 ± 0.49 |
| A-125    | 10.965                 | 4.96 ± 0.00 | 5.580                     | 5.25 ± 0.05 | >20                       | <4.70       | >20                     | <4.70       |
| A-126    | 1.349                  | 5.87 ± 0.57 | 1.730                     | 5.76 ± 0.09 | 2.145                     | 5.67 ± 0.19 | 4.713                   | 5.33 ± 0.49 |
| A-127    | 0.320                  | 6.50 ± 0.17 | 0.211                     | 6.68 ± 0.17 | 1.075                     | 5.97 ± 0.10 | 3.090                   | 5.51 ± 0.15 |
| A-128    | 5.453                  | 5.26 ± 0.33 | 0.331                     | 6.48 ± 0.18 | 1.751                     | 5.76 ± 0.27 | 5.991                   | 5.22 ± 0.31 |
| A-129    | 0.153                  | 6.82 ± 0.41 | 0.406                     | 6.39 ± 0.23 | 1.802                     | 5.74 ± 0.08 | 2.831                   | 5.55 ± 0.30 |
| A-130    | 0.279                  | 6.55 ± 0.31 | 0.130                     | 6.89 ± 0.25 | 1.113                     | 5.95 ± 0.09 | 0.885                   | 6.05 ± 0.32 |
| A-131    | 0.324                  | 6.49 ± 0.19 | 0.283                     | 6.55 ± 0.14 | 0.851                     | 6.07 ± 0.10 | 1.142                   | 5.94 ± 0.16 |
| A-132    | 10.471                 | 4.98 ± 0.01 | 5.339                     | 5.27 ± 0.28 | >20                       | <4.70       | >20                     | <4.70       |
| A-133    | 0.949                  | 6.02 ± 0.18 | 0.409                     | 6.39 ± 0.12 | 1.714                     | 5.77 ± 0.07 | 1.437                   | 5.84 ± 0.27 |
| A-134    | 0.128                  | 6.89 ± 0.28 | 0.335                     | 6.48 ± 0.09 | 1.118                     | 5.95 ± 0.10 | 1.429                   | 5.85 ± 0.26 |
| A-135    | 0.193                  | 6.72 ± 0.30 | 0.562                     | 6.25 ± 0.16 | 0.794                     | 6.10 ± 0.10 | 1.496                   | 5.83 ± 0.11 |
| A-136    | 2.385                  | 5.62 ± 0.16 | 0.573                     | 6.24 ± 0.17 | 3.337                     | 5.48 ± 0.10 | >20                     | <4.70       |
| A-137    | 0.412                  | 6.39 ± 0.16 | 2.109                     | 5.68 ± 0.30 | 2.704                     | 5.57 ± 0.10 | >20                     | <4.70       |
| A-138    | 0.333                  | 6.48 ± 0.15 | 0.309                     | 6.51 ± 0.09 | 1.318                     | 5.88 ± 0.08 | 0.525                   | 6.28 ± 0.46 |
| A-139    | 0.150                  | 6.83 ± 0.22 | 0.086                     | 7.07 ± 0.07 | 0.955                     | 6.02 ± 0.11 | 0.763                   | 6.12 ± 0.15 |
| A-140    | 0.282                  | 6.55 ± 0.29 | 0.357                     | 6.45 ± 0.20 | 1.468                     | 5.83 ± 0.05 | 1.738                   | 5.76 ± 0.42 |
| A-141    | 0.482                  | 6.32 ± 0.50 | 0.165                     | 6.78 ± 0.24 | 1.101                     | 5.96 ± 0.19 | 1.845                   | 5.73 ± 0.26 |
| A-142    | 10.233                 | 4.99 ± 0.00 | 2.831                     | 5.55 ± 0.30 | 6.457                     | 5.19 ± 0.30 | >20                     | <4.70       |
| A-143    | 0.569                  | 6.25 ± 0.31 | 1.328                     | 5.88 ± 0.22 | 5.089                     | 5.29 ± 0.12 | 3.363                   | 5.47 ± 0.03 |
| A-144    | 4.467                  | 5.35 ± 0.37 | 3.388                     | 5.47 ± 0.10 | 10.965                    | 4.96 ± 0.00 | >20                     | <4.70       |
| A-145    | 2.109                  | 5.68 ± 0.19 | 3.090                     | 5.51 ± 0.20 | 8.610                     | 5.07 ± 0.17 | 2.222                   | 5.65 ± 0.32 |
| A-146    | 1.549                  | 5.81 ± 0.33 | 3.494                     | 5.46 ± 0.14 | 15.607                    | 4.81 ± 0.11 | 12.784                  | 4.89 ± 0.10 |



**Table S3. Activity of 5-NI compounds against *Trichomonas vaginalis***

| Compound | MzS                    |             |                           |             | MzR                       |             |                         |             |
|----------|------------------------|-------------|---------------------------|-------------|---------------------------|-------------|-------------------------|-------------|
|          | <i>T. vaginalis</i> G3 |             | <i>T. vaginalis</i> F1623 |             | <i>T. vaginalis</i> B7268 |             | <i>T. vaginalis</i> LA1 |             |
|          | EC50 (μM)              | pEC50       | EC50 (μM)                 | pEC50       | EC50 (μM)                 | pEC50       | EC50 (μM)               | pEC50       |
| A-147    | 0.608                  | 6.22 ± 0.38 | 4.111                     | 5.39 ± 0.11 | 2.168                     | 5.66 ± 0.44 | 1.629                   | 5.79 ± 0.37 |
| A-148    | 0.175                  | 6.76 ± 0.17 | 0.241                     | 6.62 ± 0.17 | 0.360                     | 6.44 ± 0.27 | 1.540                   | 5.81 ± 0.17 |
| A-149    | 0.532                  | 6.27 ± 0.17 | 1.297                     | 5.89 ± 0.15 | 2.158                     | 5.67 ± 0.33 | 1.562                   | 5.81 ± 0.18 |
| A-150    | 0.902                  | 6.05 ± 0.36 | 4.704                     | 5.33 ± 0.11 | 1.961                     | 5.71 ± 0.76 | 4.677                   | 5.33 ± 0.29 |
| A-151    | 1.189                  | 5.93 ± 0.36 | 7.898                     | 5.10 ± 0.05 | 2.906                     | 5.54 ± 0.35 | 5.248                   | 5.28 ± 0.13 |
| A-152    | 0.955                  | 6.02 ± 0.16 | 2.447                     | 5.61 ± 0.17 | 2.427                     | 5.62 ± 0.43 | 2.901                   | 5.54 ± 0.13 |
| A-153    | 10.715                 | 4.97 ± 0.00 | 4.074                     | 5.39 ± 0.13 | 0.782                     | 6.11 ± 0.51 | 4.105                   | 5.39 ± 0.18 |
| A-154    | 0.424                  | 6.37 ± 0.25 | 1.613                     | 5.79 ± 0.10 | 3.181                     | 5.50 ± 0.20 | 6.972                   | 5.16 ± 0.28 |
| A-155    | 0.101                  | 7.00 ± 0.42 | 0.665                     | 6.18 ± 0.05 | 1.830                     | 5.74 ± 0.24 | 0.649                   | 6.19 ± 0.44 |
| A-156    | 0.832                  | 6.08 ± 0.00 | 0.754                     | 6.12 ± 0.15 | 0.776                     | 6.11 ± 0.35 | 0.875                   | 6.06 ± 0.18 |
| A-157    | 1.259                  | 5.90 ± 0.24 | 1.462                     | 5.84 ± 0.11 | 1.274                     | 5.90 ± 0.51 | 2.089                   | 5.68 ± 0.19 |
| A-158    | 0.387                  | 6.41 ± 0.33 | 0.468                     | 6.33 ± 0.16 | 0.936                     | 6.03 ± 0.23 | 0.695                   | 6.16 ± 0.16 |
| A-159    | 2.026                  | 5.69 ± 0.47 | 3.673                     | 5.44 ± 0.11 | 7.762                     | 5.11 ± 0.41 | 4.217                   | 5.38 ± 0.24 |
| A-160    | 2.138                  | 5.67 ± 0.40 | 2.851                     | 5.55 ± 0.26 | 3.528                     | 5.45 ± 0.31 | 5.129                   | 5.29 ± 0.30 |
| A-161    | 2.630                  | 5.58 ± 0.18 | 1.660                     | 5.78 ± 0.06 | 1.023                     | 5.99 ± 0.65 | 4.233                   | 5.37 ± 0.12 |
| A-162    | 2.034                  | 5.69 ± 0.21 | 1.730                     | 5.76 ± 0.14 | 2.556                     | 5.59 ± 0.15 | 3.311                   | 5.48 ± 0.22 |
| A-163    | 0.358                  | 6.45 ± 0.11 | 0.399                     | 6.40 ± 0.15 | 1.748                     | 5.76 ± 0.09 | 1.479                   | 5.83 ± 0.10 |
| B-101    | 0.598                  | 6.22 ± 0.34 | 0.635                     | 6.20 ± 0.11 | 0.423                     | 6.37 ± 0.71 | 1.109                   | 5.96 ± 0.45 |
| B-102    | 1.349                  | 5.87 ± 0.43 | 1.090                     | 5.96 ± 0.13 | 0.626                     | 6.20 ± 0.27 | 4.786                   | 5.32 ± 0.12 |
| B-103    | 0.169                  | 6.77 ± 0.17 | 0.167                     | 6.78 ± 0.21 | 0.610                     | 6.22 ± 0.15 | 0.813                   | 6.09 ± 0.17 |
| B-104    | 1.421                  | 5.85 ± 0.52 | 5.710                     | 5.24 ± 0.03 | 8.446                     | 5.07 ± 0.19 | 3.090                   | 5.51 ± 0.43 |
| B-105    | 2.222                  | 5.65 ± 0.42 | 4.519                     | 5.35 ± 0.05 | 1.057                     | 5.98 ± 0.44 | 8.810                   | 5.06 ± 0.36 |
| B-106    | 2.917                  | 5.54 ± 0.18 | 7.989                     | 5.10 ± 0.07 | 2.818                     | 5.55 ± 0.36 | 14.289                  | 4.85 ± 0.14 |
| B-107    | 1.096                  | 5.96 ± 0.34 | 2.226                     | 5.65 ± 0.05 | 2.606                     | 5.58 ± 0.18 | 2.385                   | 5.62 ± 0.23 |
| B-108    | 3.266                  | 5.49 ± 0.24 | 4.966                     | 5.30 ± 0.06 | 1.895                     | 5.72 ± 0.47 | 6.166                   | 5.21 ± 0.30 |
| B-109    | 4.169                  | 5.38 ± 0.32 | 5.445                     | 5.26 ± 0.08 | 4.145                     | 5.38 ± 0.35 | 14.454                  | 4.84 ± 0.14 |
| B-110    | 1.665                  | 5.78 ± 0.23 | 2.421                     | 5.62 ± 0.08 | 1.306                     | 5.88 ± 0.27 | 3.090                   | 5.51 ± 0.31 |
| B-111    | 1.164                  | 5.93 ± 0.23 | 1.052                     | 5.98 ± 0.15 | 1.131                     | 5.95 ± 0.21 | 2.585                   | 5.59 ± 0.25 |
| B-112    | 6.506                  | 5.19 ± 0.18 | 5.788                     | 5.24 ± 0.06 | 4.571                     | 5.34 ± 0.25 | 4.983                   | 5.30 ± 0.35 |
| B-113    | 0.464                  | 6.33 ± 0.21 | 0.419                     | 6.38 ± 0.17 | 3.750                     | 5.43 ± 0.20 | 1.057                   | 5.98 ± 0.25 |
| B-114    | 6.998                  | 5.16 ± 0.28 | 3.780                     | 5.42 ± 0.07 | 5.370                     | 5.27 ± 0.15 | 1.603                   | 5.80 ± 0.07 |
| B-115    | 5.188                  | 5.29 ± 0.16 | 3.737                     | 5.43 ± 0.07 | 2.630                     | 5.58 ± 0.45 | 3.589                   | 5.45 ± 0.36 |
| B-116    | 2.304                  | 5.64 ± 0.40 | 3.350                     | 5.48 ± 0.13 | 5.922                     | 5.23 ± 0.23 | 1.905                   | 5.72 ± 0.55 |
| B-117    | 1.631                  | 5.79 ± 0.23 | 0.439                     | 6.36 ± 0.15 | 2.906                     | 5.54 ± 0.14 | 0.248                   | 6.61 ± 0.46 |
| B-118    | 0.396                  | 6.40 ± 0.38 | 0.143                     | 6.84 ± 0.26 | 0.324                     | 6.49 ± 0.53 | 1.496                   | 5.83 ± 0.47 |
| B-119    | 2.497                  | 5.60 ± 0.46 | 1.288                     | 5.89 ± 0.40 | 2.278                     | 5.64 ± 0.41 | 11.350                  | 4.95 ± 0.24 |
| B-120    | 1.708                  | 5.77 ± 0.32 | 4.467                     | 5.35 ± 0.12 | 2.512                     | 5.60 ± 0.16 | 2.818                   | 5.55 ± 0.30 |
| B-121    | 1.471                  | 5.83 ± 0.28 | 2.432                     | 5.61 ± 0.20 | 1.995                     | 5.70 ± 0.14 | 0.631                   | 6.20 ± 0.41 |
| B-122    | 4.571                  | 5.34 ± 0.26 | 8.318                     | 5.08 ± 0.05 | 2.109                     | 5.68 ± 0.35 | 6.683                   | 5.18 ± 0.47 |
| B-123    | 0.372                  | 6.43 ± 0.34 | 0.794                     | 6.10 ± 0.09 | 1.225                     | 5.91 ± 0.13 | 0.670                   | 6.17 ± 0.22 |
| B-124    | 3.447                  | 5.46 ± 0.47 | 2.640                     | 5.58 ± 0.28 | 6.346                     | 5.20 ± 0.50 | 2.512                   | 5.60 ± 0.25 |
| B-125    | >20                    | <4.70       | 6.506                     | 5.19 ± 0.16 | 9.120                     | 5.04 ± 0.34 | >20                     | <4.70       |
| B-126    | 3.589                  | 5.45 ± 0.38 | 3.575                     | 5.45 ± 0.16 | 2.371                     | 5.63 ± 0.17 | 1.380                   | 5.86 ± 0.38 |
| B-127    | 1.413                  | 5.85 ± 0.40 | 0.114                     | 6.94 ± 0.35 | 0.769                     | 6.11 ± 0.26 | 0.622                   | 6.21 ± 0.36 |
| B-128    | 0.968                  | 6.01 ± 0.30 | 0.450                     | 6.35 ± 0.15 | 1.237                     | 5.91 ± 0.15 | 0.670                   | 6.17 ± 0.27 |
| B-129    | 0.385                  | 6.41 ± 0.30 | 0.610                     | 6.22 ± 0.09 | 2.065                     | 5.69 ± 0.13 | 1.862                   | 5.73 ± 0.35 |
| B-130    | 0.509                  | 6.29 ± 0.38 | 0.506                     | 6.30 ± 0.39 | 1.851                     | 5.73 ± 0.09 | 6.607                   | 5.18 ± 0.24 |

**Table S3. Activity of 5-NI compounds against *Trichomonas vaginalis***

| Compound | MzS                    |             |                           |             | MzR                       |             |                         |             |
|----------|------------------------|-------------|---------------------------|-------------|---------------------------|-------------|-------------------------|-------------|
|          | <i>T. vaginalis</i> G3 |             | <i>T. vaginalis</i> F1623 |             | <i>T. vaginalis</i> B7268 |             | <i>T. vaginalis</i> LA1 |             |
|          | EC50 (μM)              | pEC50       | EC50 (μM)                 | pEC50       | EC50 (μM)                 | pEC50       | EC50 (μM)               | pEC50       |
| B-131    | 0.484                  | 6.32 ± 0.18 | 0.258                     | 6.59 ± 0.12 | 3.508                     | 5.46 ± 0.45 | 2.742                   | 5.56 ± 0.27 |
| B-132    | 0.295                  | 6.53 ± 0.00 | 8.710                     | 5.06 ± 0.00 | 6.213                     | 5.21 ± 0.37 | 3.090                   | 5.51 ± 0.00 |
| B-133    | 1.126                  | 5.95 ± 0.18 | 1.033                     | 5.99 ± 0.11 | 1.472                     | 5.83 ± 0.18 | 1.738                   | 5.76 ± 0.11 |
| B-134    | 0.537                  | 6.27 ± 0.35 | 0.377                     | 6.42 ± 0.16 | 1.406                     | 5.85 ± 0.28 | 4.027                   | 5.40 ± 0.21 |
| B-135    | 0.292                  | 6.53 ± 0.18 | 0.696                     | 6.16 ± 0.08 | 1.330                     | 5.88 ± 0.07 | 2.692                   | 5.57 ± 0.10 |
| B-136    | 2.278                  | 5.64 ± 0.22 | 0.650                     | 6.19 ± 0.07 | 0.666                     | 6.18 ± 0.07 | 1.514                   | 5.82 ± 0.16 |
| B-137    | >20                    | <4.70       | 1.445                     | 5.84 ± 0.49 | 1.531                     | 5.82 ± 0.31 | 9.016                   | 5.05 ± 0.04 |
| B-138    | 0.664                  | 6.18 ± 0.19 | 0.324                     | 6.49 ± 0.13 | 1.179                     | 5.93 ± 0.18 | 2.997                   | 5.52 ± 0.07 |
| B-139    | 0.664                  | 6.18 ± 0.21 | 0.546                     | 6.26 ± 0.08 | 0.474                     | 6.32 ± 0.19 | 0.917                   | 6.04 ± 0.47 |
| B-140    | 0.663                  | 6.18 ± 0.14 | 0.325                     | 6.49 ± 0.21 | 1.072                     | 5.97 ± 0.19 | 1.654                   | 5.78 ± 0.14 |
| B-141    | 0.405                  | 6.39 ± 0.20 | 0.415                     | 6.38 ± 0.33 | 0.845                     | 6.07 ± 0.33 | 3.737                   | 5.43 ± 0.16 |
| B-142    | 12.764                 | 4.89 ± 0.13 | 4.365                     | 5.36 ± 0.37 | 19.953                    | 4.70 ± 0.00 | 13.107                  | 4.88 ± 0.11 |
| B-143    | 1.190                  | 5.92 ± 0.37 | 1.828                     | 5.74 ± 0.33 | 0.933                     | 6.03 ± 0.57 | 2.906                   | 5.54 ± 0.50 |
| B-144    | 5.208                  | 5.28 ± 0.58 | 4.266                     | 5.37 ± 0.22 | 13.594                    | 4.87 ± 0.17 | 19.953                  | 4.70 ± 0.00 |
| B-145    | 10.233                 | 4.99 ± 0.29 | 0.582                     | 6.24 ± 0.21 | 2.333                     | 5.63 ± 0.09 | 4.365                   | 5.36 ± 0.34 |
| B-146    | 1.462                  | 5.84 ± 0.06 | 0.920                     | 6.04 ± 0.42 | >20                       | <4.70       | 5.370                   | 5.27 ± 0.22 |
| B-147    | 1.105                  | 5.96 ± 0.55 | 0.518                     | 6.29 ± 0.27 | 2.600                     | 5.59 ± 0.10 | 3.715                   | 5.43 ± 0.16 |
| B-148    | 0.437                  | 6.36 ± 0.33 | 0.479                     | 6.32 ± 0.33 | 0.355                     | 6.45 ± 0.21 | 1.135                   | 5.95 ± 0.33 |
| B-149    | 0.986                  | 6.01 ± 0.52 | 1.303                     | 5.89 ± 0.25 | 4.290                     | 5.37 ± 0.07 | 5.329                   | 5.27 ± 0.14 |
| B-150    | 10.471                 | 4.98 ± 0.00 | 1.076                     | 5.97 ± 0.31 | 2.531                     | 5.60 ± 0.29 | 4.519                   | 5.35 ± 0.34 |
| B-151    | 0.990                  | 6.00 ± 0.29 | 0.692                     | 6.16 ± 0.12 | 1.135                     | 5.95 ± 0.36 | 1.811                   | 5.74 ± 0.23 |
| B-152    | 0.331                  | 6.48 ± 0.11 | 0.295                     | 6.53 ± 0.29 | 12.686                    | 4.90 ± 0.20 | 1.609                   | 5.79 ± 0.26 |
| B-153    | 4.074                  | 5.39 ± 0.56 | 6.310                     | 5.20 ± 0.13 | 5.453                     | 5.26 ± 0.08 | 5.934                   | 5.23 ± 0.39 |
| B-154    | 11.570                 | 4.94 ± 0.13 | 2.417                     | 5.62 ± 0.50 | 5.099                     | 5.29 ± 0.14 | 14.791                  | 4.83 ± 0.13 |
| B-155    | 0.220                  | 6.66 ± 0.15 | 0.468                     | 6.33 ± 0.30 | 0.251                     | 6.60 ± 0.14 | 0.479                   | 6.32 ± 0.22 |
| B-156    | 0.432                  | 6.37 ± 0.17 | 1.514                     | 5.82 ± 0.29 | 5.649                     | 5.25 ± 0.34 | 2.265                   | 5.65 ± 0.48 |
| B-157    | 0.539                  | 6.27 ± 0.22 | 1.451                     | 5.84 ± 0.13 | 0.490                     | 6.31 ± 0.35 | 1.531                   | 5.82 ± 0.09 |
| B-158    | 0.507                  | 6.30 ± 0.08 | 0.442                     | 6.36 ± 0.10 | 0.721                     | 6.14 ± 0.18 | 0.982                   | 6.01 ± 0.11 |
| B-159    | 4.201                  | 5.38 ± 0.16 | 4.111                     | 5.39 ± 0.12 | 1.334                     | 5.88 ± 0.43 | 6.531                   | 5.19 ± 0.18 |
| B-160    | 6.026                  | 5.22 ± 0.52 | 9.226                     | 5.04 ± 0.25 | 6.839                     | 5.17 ± 0.10 | >20                     | <4.70       |
| B-161    | 1.023                  | 5.99 ± 0.09 | 1.042                     | 5.98 ± 0.11 | 2.291                     | 5.64 ± 0.22 | 2.535                   | 5.60 ± 0.08 |
| B-162    | 3.311                  | 5.48 ± 0.38 | 4.898                     | 5.31 ± 0.09 | >20                       | <4.70       | 2.951                   | 5.53 ± 0.00 |
| B-163    | 0.220                  | 6.66 ± 0.13 | 0.322                     | 6.49 ± 0.17 | 3.090                     | 5.51 ± 0.41 | 0.657                   | 6.18 ± 0.21 |
| C-101    | 0.263                  | 6.58 ± 0.11 | 0.363                     | 6.44 ± 0.21 | 2.247                     | 5.65 ± 0.30 | 0.671                   | 6.17 ± 0.58 |
| C-102    | 0.487                  | 6.31 ± 0.26 | 0.646                     | 6.19 ± 0.13 | 1.884                     | 5.73 ± 0.17 | 8.128                   | 5.09 ± 0.11 |
| C-103    | 0.138                  | 6.86 ± 0.54 | 0.218                     | 6.66 ± 0.29 | 0.283                     | 6.55 ± 0.17 | 0.208                   | 6.68 ± 0.38 |
| C-104    | 0.804                  | 6.10 ± 0.30 | 0.933                     | 6.03 ± 0.21 | 1.326                     | 5.88 ± 0.13 | 5.370                   | 5.27 ± 0.09 |
| C-105    | 0.933                  | 6.03 ± 0.55 | 1.549                     | 5.81 ± 0.23 | 1.059                     | 5.98 ± 0.34 | >20                     | <4.70       |
| C-106    | 0.813                  | 6.09 ± 0.26 | 0.994                     | 6.00 ± 0.22 | 1.698                     | 5.77 ± 0.32 | 8.382                   | 5.08 ± 0.19 |
| C-107    | 1.609                  | 5.79 ± 0.38 | 0.929                     | 6.03 ± 0.14 | 1.274                     | 5.90 ± 0.06 | 1.015                   | 5.99 ± 0.36 |
| C-108    | 0.881                  | 6.06 ± 0.29 | 1.300                     | 5.89 ± 0.05 | 2.934                     | 5.53 ± 0.24 | 1.502                   | 5.82 ± 0.49 |
| C-109    | 0.521                  | 6.28 ± 0.38 | 1.507                     | 5.82 ± 0.16 | 1.792                     | 5.75 ± 0.31 | 3.715                   | 5.43 ± 0.45 |
| C-110    | 0.380                  | 6.42 ± 0.46 | 0.973                     | 6.01 ± 0.09 | 3.144                     | 5.50 ± 0.30 | 1.139                   | 5.94 ± 0.58 |
| C-111    | 0.178                  | 6.75 ± 0.33 | 0.277                     | 6.56 ± 0.11 | 0.937                     | 6.03 ± 0.16 | 0.700                   | 6.16 ± 0.48 |
| C-112    | 0.358                  | 6.45 ± 0.24 | 0.471                     | 6.33 ± 0.10 | 0.560                     | 6.25 ± 0.27 | 6.026                   | 5.22 ± 0.31 |
| C-113    | 0.118                  | 6.93 ± 0.36 | 0.242                     | 6.62 ± 0.09 | 0.776                     | 6.11 ± 0.17 | 1.288                   | 5.89 ± 0.16 |
| C-114    | 1.122                  | 5.95 ± 0.21 | 1.209                     | 5.92 ± 0.13 | 0.335                     | 6.48 ± 0.31 | 0.782                   | 6.11 ± 0.68 |

**Table S3. Activity of 5-NI compounds against *Trichomonas vaginalis***

| Compound | MzS                    |             |                           |             | MzR                       |             |                         |             |
|----------|------------------------|-------------|---------------------------|-------------|---------------------------|-------------|-------------------------|-------------|
|          | <i>T. vaginalis</i> G3 |             | <i>T. vaginalis</i> F1623 |             | <i>T. vaginalis</i> B7268 |             | <i>T. vaginalis</i> LA1 |             |
|          | EC50 (μM)              | pEC50       | EC50 (μM)                 | pEC50       | EC50 (μM)                 | pEC50       | EC50 (μM)               | pEC50       |
| C-115    | 0.500                  | 6.30 ± 0.29 | 0.601                     | 6.22 ± 0.23 | 1.728                     | 5.76 ± 0.12 | 5.395                   | 5.27 ± 0.13 |
| C-116    | 1.105                  | 5.96 ± 0.23 | 0.553                     | 6.26 ± 0.20 | 2.570                     | 5.59 ± 0.28 | 2.362                   | 5.63 ± 0.29 |
| C-117    | 0.257                  | 6.59 ± 0.41 | 0.688                     | 6.16 ± 0.26 | 1.660                     | 5.78 ± 0.24 | 4.074                   | 5.39 ± 0.24 |
| C-118    | 0.234                  | 6.63 ± 0.43 | 0.357                     | 6.45 ± 0.27 | 1.288                     | 5.89 ± 0.13 | 0.575                   | 6.24 ± 0.30 |
| C-119    | 0.407                  | 6.39 ± 0.36 | 0.617                     | 6.21 ± 0.20 | 0.451                     | 6.35 ± 0.37 | 0.461                   | 6.34 ± 0.54 |
| C-120    | 1.841                  | 5.74 ± 0.34 | 0.972                     | 6.01 ± 0.07 | 0.173                     | 6.76 ± 0.28 | 2.541                   | 5.60 ± 0.22 |
| C-121    | 0.513                  | 6.29 ± 0.34 | 0.569                     | 6.25 ± 0.05 | 0.501                     | 6.30 ± 0.26 | 1.778                   | 5.75 ± 0.19 |
| C-122    | 1.249                  | 5.90 ± 0.27 | 0.950                     | 6.02 ± 0.08 | 1.353                     | 5.87 ± 0.31 | 4.043                   | 5.39 ± 0.07 |
| C-123    | 0.646                  | 6.19 ± 0.41 | 0.525                     | 6.28 ± 0.22 | 0.659                     | 6.18 ± 0.16 | 1.549                   | 5.81 ± 0.03 |
| C-124    | 0.209                  | 6.68 ± 0.17 | 0.994                     | 6.00 ± 0.12 | 1.144                     | 5.94 ± 0.25 | 1.688                   | 5.77 ± 0.44 |
| C-125    | 2.862                  | 5.54 ± 0.51 | 1.708                     | 5.77 ± 0.10 | 2.388                     | 5.62 ± 0.20 | 6.918                   | 5.16 ± 0.03 |
| C-126    | 0.234                  | 6.63 ± 0.16 | 1.035                     | 5.99 ± 0.11 | 2.985                     | 5.53 ± 0.25 | 2.113                   | 5.68 ± 0.10 |
| C-127    | 0.626                  | 6.20 ± 0.28 | 0.592                     | 6.23 ± 0.35 | 1.434                     | 5.84 ± 0.32 | 1.298                   | 5.89 ± 0.34 |
| C-128    | 0.541                  | 6.27 ± 0.12 | 1.841                     | 5.74 ± 0.33 | 1.413                     | 5.85 ± 0.36 | 3.428                   | 5.47 ± 0.25 |
| C-129    | 0.054                  | 7.27 ± 0.04 | 0.827                     | 6.08 ± 0.31 | 0.676                     | 6.17 ± 0.35 | 1.055                   | 5.98 ± 0.40 |
| C-130    | 0.071                  | 7.15 ± 0.24 | 0.045                     | 7.35 ± 0.19 | 0.444                     | 6.35 ± 0.16 | 0.694                   | 6.16 ± 0.27 |
| C-131    | 0.033                  | 7.48 ± 0.21 | 0.141                     | 6.85 ± 0.14 | 0.557                     | 6.25 ± 0.18 | 0.168                   | 6.78 ± 0.30 |
| C-132    | 1.109                  | 5.96 ± 0.60 | 3.187                     | 5.50 ± 0.18 | 4.823                     | 5.32 ± 0.14 | 0.808                   | 6.09 ± 0.39 |
| C-133    | 0.120                  | 6.92 ± 0.29 | 0.733                     | 6.14 ± 0.21 | 0.819                     | 6.09 ± 0.17 | 1.230                   | 5.91 ± 0.19 |
| C-134    | 0.106                  | 6.98 ± 0.34 | 0.213                     | 6.67 ± 0.27 | 0.327                     | 6.49 ± 0.37 | 1.274                   | 5.90 ± 0.27 |
| C-135    | 0.060                  | 7.22 ± 0.28 | 0.158                     | 6.80 ± 0.42 | 0.438                     | 6.36 ± 0.19 | 0.150                   | 6.83 ± 0.25 |
| C-136    | 0.071                  | 7.15 ± 0.47 | 0.545                     | 6.26 ± 0.11 | 0.579                     | 6.24 ± 0.15 | 0.531                   | 6.28 ± 0.38 |
| C-137    | 0.048                  | 7.32 ± 0.39 | 0.196                     | 6.71 ± 0.27 | 0.335                     | 6.48 ± 0.25 | 0.827                   | 6.08 ± 0.60 |
| C-138    | 0.162                  | 6.79 ± 0.17 | 0.220                     | 6.66 ± 0.09 | 0.532                     | 6.27 ± 0.17 | 0.401                   | 6.40 ± 0.20 |
| C-139    | 0.103                  | 6.99 ± 0.16 | 0.131                     | 6.88 ± 0.10 | 0.452                     | 6.35 ± 0.08 | 0.210                   | 6.68 ± 0.22 |
| C-140    | 0.977                  | 6.01 ± 0.26 | 0.355                     | 6.45 ± 0.34 | 1.820                     | 5.74 ± 0.05 | 3.187                   | 5.50 ± 0.20 |
| C-141    | 0.261                  | 6.58 ± 0.05 | 0.160                     | 6.80 ± 0.25 | 1.023                     | 5.99 ± 0.34 | 1.189                   | 5.93 ± 0.14 |
| C-142    | 1.820                  | 5.74 ± 0.18 | 1.995                     | 5.70 ± 0.13 | 5.689                     | 5.25 ± 0.13 | 3.388                   | 5.47 ± 0.20 |
| C-143    | 0.358                  | 6.45 ± 0.08 | 0.200                     | 6.70 ± 0.11 | 1.288                     | 5.89 ± 0.24 | 0.885                   | 6.05 ± 0.10 |
| C-144    | 0.797                  | 6.10 ± 0.19 | 1.514                     | 5.82 ± 0.09 | 4.732                     | 5.33 ± 0.06 | 2.317                   | 5.64 ± 0.17 |
| C-145    | 0.968                  | 6.01 ± 0.34 | 0.497                     | 6.30 ± 0.21 | 1.365                     | 5.87 ± 0.23 | 0.319                   | 6.50 ± 0.35 |
| C-146    | 4.416                  | 5.36 ± 0.14 | 2.985                     | 5.53 ± 0.23 | 5.559                     | 5.26 ± 0.16 | 1.641                   | 5.79 ± 0.71 |
| C-147    | 0.572                  | 6.24 ± 0.10 | 0.485                     | 6.31 ± 0.27 | 1.834                     | 5.74 ± 0.09 | 3.715                   | 5.43 ± 0.12 |
| C-148    | 0.150                  | 6.82 ± 0.11 | 0.147                     | 6.83 ± 0.15 | 0.430                     | 6.37 ± 0.20 | 0.253                   | 6.60 ± 0.34 |
| C-149    | 0.339                  | 6.47 ± 0.14 | 0.441                     | 6.36 ± 0.15 | 1.009                     | 6.00 ± 0.32 | 0.948                   | 6.02 ± 0.53 |
| C-150    | 1.939                  | 5.71 ± 0.11 | 3.126                     | 5.51 ± 0.07 | 6.607                     | 5.18 ± 0.12 | 0.955                   | 6.02 ± 0.43 |
| C-151    | 1.223                  | 5.91 ± 0.17 | 1.770                     | 5.75 ± 0.10 | 3.494                     | 5.46 ± 0.08 | 1.980                   | 5.70 ± 0.23 |
| C-152    | 0.692                  | 6.16 ± 0.10 | 1.197                     | 5.92 ± 0.17 | 3.236                     | 5.49 ± 0.40 | 5.370                   | 5.27 ± 0.30 |
| C-153    | 0.498                  | 6.30 ± 0.16 | 0.597                     | 6.22 ± 0.19 | 1.029                     | 5.99 ± 0.69 | 0.505                   | 6.30 ± 0.46 |
| C-154    | 1.175                  | 5.93 ± 0.23 | 2.158                     | 5.67 ± 0.10 | 9.261                     | 5.03 ± 0.17 | 3.020                   | 5.52 ± 0.30 |
| C-155    | 0.163                  | 6.79 ± 0.10 | 0.160                     | 6.80 ± 0.29 | 1.413                     | 5.85 ± 0.49 | 0.556                   | 6.26 ± 0.45 |
| C-156    | 0.287                  | 6.54 ± 0.13 | 1.047                     | 5.98 ± 0.22 | 1.862                     | 5.73 ± 0.22 | 0.804                   | 6.10 ± 0.14 |
| C-157    | 0.550                  | 6.26 ± 0.09 | 0.676                     | 6.17 ± 0.13 | 0.617                     | 6.21 ± 0.42 | 0.475                   | 6.32 ± 0.33 |
| C-158    | 0.102                  | 6.99 ± 0.25 | 0.380                     | 6.42 ± 0.21 | 2.385                     | 5.62 ± 0.34 | 0.933                   | 6.03 ± 0.48 |
| C-159    | 0.891                  | 6.05 ± 0.23 | 0.839                     | 6.08 ± 0.21 | 1.920                     | 5.72 ± 0.21 | 1.718                   | 5.77 ± 0.39 |
| C-160    | 0.585                  | 6.23 ± 0.16 | 1.038                     | 5.98 ± 0.15 | 3.337                     | 5.48 ± 0.07 | 1.834                   | 5.74 ± 0.44 |
| C-161    | 0.240                  | 6.62 ± 0.16 | 0.406                     | 6.39 ± 0.11 | 1.122                     | 5.95 ± 0.14 | 0.401                   | 6.40 ± 0.35 |

**Table S3. Activity of 5-NI compounds against *Trichomonas vaginalis***

| Compound | MzS                    |             |                           |             | MzR                       |             |                         |             |
|----------|------------------------|-------------|---------------------------|-------------|---------------------------|-------------|-------------------------|-------------|
|          | <i>T. vaginalis</i> G3 |             | <i>T. vaginalis</i> F1623 |             | <i>T. vaginalis</i> B7268 |             | <i>T. vaginalis</i> LA1 |             |
|          | EC50 (μM)              | pEC50       | EC50 (μM)                 | pEC50       | EC50 (μM)                 | pEC50       | EC50 (μM)               | pEC50       |
| C-162    | 0.470                  | 6.33 ± 0.31 | 1.308                     | 5.88 ± 0.21 | 3.133                     | 5.50 ± 0.23 | 1.738                   | 5.76 ± 0.66 |
| C-163    | 0.155                  | 6.81 ± 0.25 | 0.223                     | 6.65 ± 0.20 | 0.752                     | 6.12 ± 0.25 | 2.417                   | 5.62 ± 0.35 |
| D-101    | 6.131                  | 5.21 ± 0.16 | 1.052                     | 5.98 ± 0.40 | >20                       | <4.70       | >20                     | <4.70       |
| D-102    | 10.715                 | 4.97 ± 0.16 | 6.839                     | 5.17 ± 0.07 | >20                       | <4.70       | >20                     | <4.70       |
| D-103    | 2.261                  | 5.65 ± 0.32 | 2.371                     | 5.63 ± 0.16 | 9.190                     | 5.04 ± 0.20 | >20                     | <4.70       |
| D-104    | 17.701                 | 4.75 ± 0.04 | 4.613                     | 5.34 ± 0.36 | >20                       | <4.70       | >20                     | <4.70       |
| D-105    | >20                    | <4.70       | 7.189                     | 5.14 ± 0.10 | 11.749                    | 4.93 ± 0.23 | >20                     | <4.70       |
| D-106    | >20                    | <4.70       | 7.126                     | 5.15 ± 0.20 | 10.312                    | 4.99 ± 0.29 | >20                     | <4.70       |
| D-107    | 14.791                 | 4.83 ± 0.13 | 5.623                     | 5.25 ± 0.11 | 8.981                     | 5.05 ± 0.18 | >20                     | <4.70       |
| D-108    | 14.344                 | 4.84 ± 0.14 | 4.677                     | 5.33 ± 0.20 | 2.985                     | 5.53 ± 0.48 | >20                     | <4.70       |
| D-109    | 11.482                 | 4.94 ± 0.24 | 3.108                     | 5.51 ± 0.33 | 13.259                    | 4.88 ± 0.10 | >20                     | <4.70       |
| D-110    | 11.482                 | 4.94 ± 0.24 | 2.526                     | 5.60 ± 0.37 | 5.433                     | 5.27 ± 0.33 | >20                     | <4.70       |
| D-111    | 8.175                  | 5.09 ± 0.08 | 2.061                     | 5.69 ± 0.44 | 12.092                    | 4.92 ± 0.14 | >20                     | <4.70       |
| D-112    | 10.902                 | 4.96 ± 0.18 | 6.346                     | 5.20 ± 0.23 | 9.441                     | 5.03 ± 0.23 | >20                     | <4.70       |
| D-113    | 9.698                  | 5.01 ± 0.19 | 2.158                     | 5.67 ± 0.42 | 12.882                    | 4.89 ± 0.19 | >20                     | <4.70       |
| D-114    | >20                    | <4.70       | 6.918                     | 5.16 ± 0.00 | 15.971                    | 4.80 ± 0.10 | >20                     | <4.70       |
| D-115    | >20                    | <4.70       | 6.658                     | 5.18 ± 0.06 | >20                       | <4.70       | >20                     | <4.70       |
| D-116    | >20                    | <4.70       | 2.317                     | 5.64 ± 0.06 | 10.593                    | 4.98 ± 0.02 | >20                     | <4.70       |
| D-117    | 10.593                 | 4.98 ± 0.01 | 4.467                     | 5.35 ± 0.13 | >20                       | <4.70       | >20                     | <4.70       |
| D-118    | 1.393                  | 5.86 ± 0.38 | 0.646                     | 6.19 ± 0.23 | 6.658                     | 5.18 ± 0.20 | >20                     | <4.70       |
| D-119    | 11.220                 | 4.95 ± 0.00 | 4.974                     | 5.30 ± 0.06 | >20                       | <4.70       | >20                     | <4.70       |
| D-120    | 2.138                  | 5.67 ± 0.47 | 4.898                     | 5.31 ± 0.09 | >20                       | <4.70       | >20                     | <4.70       |
| D-121    | 5.309                  | 5.28 ± 0.30 | 4.823                     | 5.32 ± 0.12 | >20                       | <4.70       | >20                     | <4.70       |
| D-122    | 7.674                  | 5.12 ± 0.14 | 6.358                     | 5.20 ± 0.09 | >20                       | <4.70       | >20                     | <4.70       |
| D-123    | 1.193                  | 5.92 ± 0.33 | 0.933                     | 6.03 ± 0.11 | 4.074                     | 5.39 ± 0.13 | 3.487                   | 5.46 ± 0.27 |
| D-124    | 10.471                 | 4.98 ± 0.00 | 7.244                     | 5.14 ± 0.16 | >20                       | <4.70       | >20                     | <4.70       |
| D-125    | >20                    | <4.70       | 10.633                    | 4.97 ± 0.14 | >20                       | <4.70       | 7.528                   | 5.12 ± 0.42 |
| D-126    | 0.240                  | 6.62 ± 0.00 | 6.095                     | 5.22 ± 0.03 | 8.660                     | 5.06 ± 0.36 | >20                     | <4.70       |
| D-127    | 4.955                  | 5.31 ± 0.32 | 2.500                     | 5.60 ± 0.14 | 1.950                     | 5.71 ± 0.43 | 13.032                  | 4.89 ± 0.19 |
| D-128    | 3.908                  | 5.41 ± 0.16 | 4.768                     | 5.32 ± 0.09 | >20                       | <4.70       | 6.310                   | 5.20 ± 0.42 |
| D-129    | 3.715                  | 5.43 ± 0.20 | 4.137                     | 5.38 ± 0.12 | 7.528                     | 5.12 ± 0.42 | 16.218                  | 4.79 ± 0.09 |
| D-130    | 1.995                  | 5.70 ± 0.69 | 2.738                     | 5.56 ± 0.30 | 13.490                    | 4.87 ± 0.17 | >20                     | <4.70       |
| D-131    | 8.066                  | 5.09 ± 0.26 | 1.452                     | 5.84 ± 0.15 | 5.623                     | 5.25 ± 0.22 | 5.129                   | 5.29 ± 0.59 |
| D-132    | 7.161                  | 5.15 ± 0.45 | 3.569                     | 5.45 ± 0.37 | >20                       | <4.70       | >20                     | <4.70       |
| D-133    | 10.965                 | 4.96 ± 0.00 | 1.683                     | 5.77 ± 0.43 | >20                       | <4.70       | >20                     | <4.70       |
| D-134    | 0.861                  | 6.07 ± 0.32 | 1.038                     | 5.98 ± 0.14 | 10.471                    | 4.98 ± 0.14 | >20                     | <4.70       |
| D-135    | 0.575                  | 6.24 ± 0.36 | 2.249                     | 5.65 ± 0.14 | 7.943                     | 5.10 ± 0.08 | 0.720                   | 6.14 ± 0.54 |
| D-136    | 1.413                  | 5.85 ± 0.48 | 1.650                     | 5.78 ± 0.13 | >20                       | <4.70       | 13.183                  | 4.88 ± 0.18 |
| D-137    | 1.059                  | 5.98 ± 0.20 | 1.613                     | 5.79 ± 0.44 | 4.114                     | 5.39 ± 0.17 | 3.330                   | 5.48 ± 0.42 |
| D-138    | 3.589                  | 5.45 ± 0.75 | 2.150                     | 5.67 ± 0.08 | 10.233                    | 4.99 ± 0.00 | >20                     | <4.70       |
| D-139    | 6.998                  | 5.16 ± 0.19 | 1.202                     | 5.92 ± 0.38 | >20                       | <4.70       | >20                     | <4.70       |
| D-140    | 0.921                  | 6.04 ± 0.41 | 0.468                     | 6.33 ± 0.33 | 6.839                     | 5.17 ± 0.18 | 5.129                   | 5.29 ± 0.59 |
| D-141    | 5.188                  | 5.29 ± 0.59 | 0.622                     | 6.21 ± 0.41 | 7.943                     | 5.10 ± 0.20 | >20                     | <4.70       |
| D-142    | >20                    | <4.70       | 4.266                     | 5.37 ± 0.36 | 14.566                    | 4.84 ± 0.14 | >20                     | <4.70       |
| D-143    | 0.148                  | 6.83 ± 0.08 | 3.802                     | 5.42 ± 0.09 | 14.234                    | 4.85 ± 0.15 | >20                     | <4.70       |
| D-144    | >20                    | <4.70       | 1.950                     | 5.71 ± 0.00 | >20                       | <4.70       | >20                     | <4.70       |
| D-145    | 0.232                  | 6.64 ± 0.50 | 3.114                     | 5.51 ± 0.30 | 14.017                    | 4.85 ± 0.15 | >20                     | <4.70       |

**Table S3. Activity of 5-NI compounds against *Trichomonas vaginalis***

| Compound | MzS                    |             |                           |             | MzR                       |             |                         |             |
|----------|------------------------|-------------|---------------------------|-------------|---------------------------|-------------|-------------------------|-------------|
|          | <i>T. vaginalis</i> G3 |             | <i>T. vaginalis</i> F1623 |             | <i>T. vaginalis</i> B7268 |             | <i>T. vaginalis</i> LA1 |             |
|          | EC50 (μM)              | pEC50       | EC50 (μM)                 | pEC50       | EC50 (μM)                 | pEC50       | EC50 (μM)               | pEC50       |
| D-146    | >20                    | <4.70       | 6.658                     | 5.18 ± 0.34 | >20                       | <4.70       | >20                     | <4.70       |
| D-147    | 4.519                  | 5.35 ± 0.64 | 8.710                     | 5.06 ± 0.12 | >20                       | <4.70       | >20                     | <4.70       |
| D-148    | 10.471                 | 4.98 ± 0.00 | 6.457                     | 5.19 ± 0.37 | >20                       | <4.70       | >20                     | <4.70       |
| D-149    | >20                    | <4.70       | 14.289                    | 4.85 ± 0.14 | >20                       | <4.70       | >20                     | <4.70       |
| D-150    | 13.490                 | 4.87 ± 0.17 | 14.454                    | 4.84 ± 0.14 | >20                       | <4.70       | >20                     | <4.70       |
| D-151    | 14.622                 | 4.84 ± 0.14 | 4.074                     | 5.39 ± 0.69 | 15.971                    | 4.80 ± 0.10 | >20                     | <4.70       |
| D-152    | 4.467                  | 5.35 ± 0.00 | 4.493                     | 5.35 ± 0.32 | 16.218                    | 4.79 ± 0.09 | >20                     | <4.70       |
| D-153    | >20                    | <4.70       | 14.017                    | 4.85 ± 0.15 | >20                       | <4.70       | >20                     | <4.70       |
| D-154    | >20                    | <4.70       | 12.162                    | 4.92 ± 0.14 | >20                       | <4.70       | >20                     | <4.70       |
| D-155    | 7.674                  | 5.12 ± 0.42 | 4.036                     | 5.39 ± 0.11 | 7.762                     | 5.11 ± 0.23 | >20                     | <4.70       |
| D-156    | >20                    | <4.70       | 6.722                     | 5.17 ± 0.12 | 7.178                     | 5.14 ± 0.38 | >20                     | <4.70       |
| D-157    | 2.723                  | 5.57 ± 0.01 | 2.103                     | 5.68 ± 0.10 | 7.703                     | 5.11 ± 0.21 | >20                     | <4.70       |
| D-158    | 0.045                  | 7.35 ± 0.00 | 1.345                     | 5.87 ± 0.26 | >20                       | <4.70       | >20                     | <4.70       |
| D-159    | 1.084                  | 5.97 ± 0.06 | 8.710                     | 5.06 ± 0.25 | >20                       | <4.70       | 16.469                  | 4.78 ± 0.08 |
| D-160    | 0.018                  | 7.74 ± 0.00 | 3.499                     | 5.46 ± 0.43 | >20                       | <4.70       | >20                     | <4.70       |
| D-161    | 10.233                 | 4.99 ± 0.00 | 1.770                     | 5.75 ± 0.42 | >20                       | <4.70       | >20                     | <4.70       |
| D-162    | >20                    | <4.70       | 5.248                     | 5.28 ± 0.14 | >20                       | <4.70       | >20                     | <4.70       |
| D-163    | 10.715                 | 4.97 ± 0.00 | 3.373                     | 5.47 ± 0.00 | >20                       | <4.70       | >20                     | <4.70       |
| E-101    | 0.311                  | 6.51 ± 0.12 | 0.059                     | 7.23 ± 0.32 | 0.871                     | 6.06 ± 0.12 | 0.888                   | 6.05 ± 0.24 |
| E-102    | 0.349                  | 6.46 ± 0.08 | 0.251                     | 6.60 ± 0.11 | 0.839                     | 6.08 ± 0.10 | 1.622                   | 5.79 ± 0.15 |
| E-103    | 0.196                  | 6.71 ± 0.38 | 0.112                     | 6.95 ± 0.43 | 0.820                     | 6.09 ± 0.24 | 1.738                   | 5.76 ± 0.50 |
| E-104    | 2.615                  | 5.58 ± 0.36 | 0.452                     | 6.35 ± 0.24 | 1.786                     | 5.75 ± 0.05 | 14.125                  | 4.85 ± 0.15 |
| E-105    | 0.550                  | 6.26 ± 0.10 | 0.450                     | 6.35 ± 0.28 | 1.669                     | 5.78 ± 0.09 | 13.490                  | 4.87 ± 0.17 |
| E-106    | 0.241                  | 6.62 ± 0.48 | 1.298                     | 5.89 ± 0.27 | 10.233                    | 4.99 ± 0.00 | 14.791                  | 4.83 ± 0.13 |
| E-107    | 0.165                  | 6.78 ± 0.15 | 0.139                     | 6.86 ± 0.30 | 0.724                     | 6.14 ± 0.30 | 10.351                  | 4.99 ± 0.29 |
| E-108    | 0.295                  | 6.53 ± 0.33 | 0.804                     | 6.10 ± 0.11 | 1.746                     | 5.76 ± 0.15 | 4.732                   | 5.33 ± 0.32 |
| E-109    | 0.606                  | 6.22 ± 0.36 | 0.501                     | 6.30 ± 0.50 | 1.195                     | 5.92 ± 0.26 | 0.876                   | 6.06 ± 0.55 |
| E-110    | 0.279                  | 6.56 ± 0.21 | 0.282                     | 6.55 ± 0.17 | 1.607                     | 5.79 ± 0.28 | 6.531                   | 5.19 ± 0.18 |
| E-111    | 0.955                  | 6.02 ± 0.29 | 0.400                     | 6.40 ± 0.23 | 2.455                     | 5.61 ± 0.11 | 1.525                   | 5.82 ± 0.35 |
| E-112    | 0.417                  | 6.38 ± 0.25 | 0.871                     | 6.06 ± 0.02 | 2.252                     | 5.65 ± 0.11 | 2.951                   | 5.53 ± 0.22 |
| E-113    | 0.529                  | 6.28 ± 0.15 | 0.136                     | 6.87 ± 0.18 | 0.265                     | 6.58 ± 0.29 | 0.398                   | 6.40 ± 0.17 |
| E-114    | 0.952                  | 6.02 ± 0.25 | 0.884                     | 6.05 ± 0.13 | 0.933                     | 6.03 ± 0.09 | 1.873                   | 5.73 ± 0.11 |
| E-115    | 0.732                  | 6.14 ± 0.29 | 0.636                     | 6.20 ± 0.17 | 1.000                     | 6.00 ± 0.10 | 0.444                   | 6.35 ± 0.34 |
| E-116    | 0.963                  | 6.02 ± 0.22 | 0.571                     | 6.24 ± 0.20 | 1.078                     | 5.97 ± 0.33 | 7.536                   | 5.12 ± 0.13 |
| E-117    | 1.031                  | 5.99 ± 0.59 | 0.851                     | 6.07 ± 0.87 | 0.700                     | 6.16 ± 0.39 | >20                     | <4.70       |
| E-118    | 0.770                  | 6.11 ± 0.15 | 1.023                     | 5.99 ± 0.23 | 3.404                     | 5.47 ± 0.09 | 4.713                   | 5.33 ± 0.40 |
| E-119    | 0.744                  | 6.13 ± 0.09 | 0.585                     | 6.23 ± 0.12 | 1.057                     | 5.98 ± 0.27 | 3.337                   | 5.48 ± 0.27 |
| E-120    | 0.397                  | 6.40 ± 0.32 | 0.358                     | 6.45 ± 0.22 | 0.989                     | 6.01 ± 0.13 | 3.060                   | 5.51 ± 0.18 |
| E-121    | 0.479                  | 6.32 ± 0.36 | 0.905                     | 6.04 ± 0.34 | 2.884                     | 5.54 ± 0.04 | >20                     | <4.70       |
| E-122    | 1.493                  | 5.83 ± 0.41 | 1.609                     | 5.79 ± 0.16 | 1.928                     | 5.72 ± 0.23 | 4.624                   | 5.34 ± 0.63 |
| E-123    | 0.432                  | 6.37 ± 0.12 | 0.252                     | 6.60 ± 0.29 | 1.344                     | 5.87 ± 0.19 | 0.540                   | 6.27 ± 0.16 |
| E-124    | 3.350                  | 5.48 ± 0.50 | 2.531                     | 5.60 ± 0.19 | 0.923                     | 6.04 ± 0.21 | 0.781                   | 6.11 ± 0.41 |
| E-125    | 1.585                  | 5.80 ± 0.12 | 0.832                     | 6.08 ± 0.30 | 4.169                     | 5.38 ± 0.24 | 6.761                   | 5.17 ± 0.13 |
| E-126    | 1.950                  | 5.71 ± 0.12 | 0.827                     | 6.08 ± 0.26 | 1.380                     | 5.86 ± 0.34 | 5.580                   | 5.25 ± 0.23 |
| E-127    | 0.804                  | 6.10 ± 0.32 | 2.252                     | 5.65 ± 0.17 | 10.174                    | 4.99 ± 0.17 | 8.643                   | 5.06 ± 0.36 |
| E-128    | 0.507                  | 6.30 ± 0.37 | 0.213                     | 6.67 ± 0.29 | 1.109                     | 5.96 ± 0.21 | 1.450                   | 5.84 ± 0.31 |
| E-129    | >20                    | <4.70       | 1.047                     | 5.98 ± 0.39 | 1.318                     | 5.88 ± 0.04 | 0.972                   | 6.01 ± 0.60 |

**Table S3. Activity of 5-NI compounds against *Trichomonas vaginalis***

| Compound | MzS                    |             |                           |             | MzR                       |             |                         |             |
|----------|------------------------|-------------|---------------------------|-------------|---------------------------|-------------|-------------------------|-------------|
|          | <i>T. vaginalis</i> G3 |             | <i>T. vaginalis</i> F1623 |             | <i>T. vaginalis</i> B7268 |             | <i>T. vaginalis</i> LA1 |             |
|          | EC50 (μM)              | pEC50       | EC50 (μM)                 | pEC50       | EC50 (μM)                 | pEC50       | EC50 (μM)               | pEC50       |
| E-130    | 0.521                  | 6.28 ± 0.21 | 0.515                     | 6.29 ± 0.11 | 3.715                     | 5.43 ± 0.01 | 5.318                   | 5.27 ± 0.23 |
| E-131    | 0.251                  | 6.60 ± 0.10 | 0.708                     | 6.15 ± 0.27 | 4.732                     | 5.33 ± 0.20 | 4.545                   | 5.34 ± 0.24 |
| E-132    | 3.388                  | 5.47 ± 0.49 | 5.517                     | 5.26 ± 0.12 | 14.125                    | 4.85 ± 0.15 | 19.679                  | 4.71 ± 0.01 |
| E-133    | 1.765                  | 5.75 ± 0.12 | 0.966                     | 6.02 ± 0.22 | 2.399                     | 5.62 ± 0.37 | 8.318                   | 5.08 ± 0.09 |
| E-134    | 0.222                  | 6.65 ± 0.20 | 0.202                     | 6.70 ± 0.17 | 2.421                     | 5.62 ± 0.04 | 1.589                   | 5.80 ± 0.28 |
| E-135    | 0.196                  | 6.71 ± 0.15 | 0.155                     | 6.81 ± 0.27 | 1.683                     | 5.77 ± 0.21 | 4.188                   | 5.38 ± 0.32 |
| E-136    | 0.496                  | 6.30 ± 0.09 | 0.374                     | 6.43 ± 0.33 | 9.333                     | 5.03 ± 0.33 | 2.018                   | 5.70 ± 0.25 |
| E-137    | 1.531                  | 5.82 ± 0.28 | 0.257                     | 6.59 ± 0.34 | 1.247                     | 5.90 ± 0.24 | 3.363                   | 5.47 ± 0.28 |
| E-138    | 0.213                  | 6.67 ± 0.20 | 0.121                     | 6.92 ± 0.16 | 0.679                     | 6.17 ± 0.11 | 0.962                   | 6.02 ± 0.28 |
| E-139    | 0.494                  | 6.31 ± 0.12 | 0.146                     | 6.84 ± 0.14 | 0.896                     | 6.05 ± 0.19 | 0.669                   | 6.17 ± 0.27 |
| E-140    | 0.767                  | 6.12 ± 0.26 | 0.414                     | 6.38 ± 0.17 | 1.521                     | 5.82 ± 0.10 | 2.840                   | 5.55 ± 0.28 |
| E-141    | 0.433                  | 6.36 ± 0.18 | 0.277                     | 6.56 ± 0.16 | 1.105                     | 5.96 ± 0.08 | 2.466                   | 5.61 ± 0.20 |
| E-142    | 2.050                  | 5.69 ± 0.39 | 2.175                     | 5.66 ± 0.23 | 2.723                     | 5.57 ± 0.18 | 4.266                   | 5.37 ± 0.13 |
| E-143    | 0.122                  | 6.91 ± 0.16 | 0.121                     | 6.92 ± 0.25 | 0.698                     | 6.16 ± 0.10 | 0.410                   | 6.39 ± 0.14 |
| E-144    | 1.318                  | 5.88 ± 0.00 | 5.495                     | 5.26 ± 0.16 | >20                       | <4.70       | >20                     | <4.70       |
| E-145    | 3.951                  | 5.40 ± 0.15 | 2.809                     | 5.55 ± 0.18 | >20                       | <4.70       | 9.261                   | 5.03 ± 0.26 |
| E-146    | 0.522                  | 6.28 ± 0.32 | 1.977                     | 5.70 ± 0.18 | 3.078                     | 5.51 ± 0.21 | 10.798                  | 4.97 ± 0.16 |
| E-147    | 9.120                  | 5.04 ± 0.34 | 0.846                     | 6.07 ± 0.44 | 2.309                     | 5.64 ± 0.35 | 7.025                   | 5.15 ± 0.33 |
| E-148    | 0.577                  | 6.24 ± 0.13 | 0.447                     | 6.35 ± 0.18 | 0.959                     | 6.02 ± 0.15 | 1.148                   | 5.94 ± 0.34 |
| E-149    | 0.589                  | 6.23 ± 0.06 | 0.460                     | 6.34 ± 0.16 | 2.466                     | 5.61 ± 0.08 | 0.944                   | 6.03 ± 0.23 |
| E-150    | 1.728                  | 5.76 ± 0.27 | 0.747                     | 6.13 ± 0.33 | 1.076                     | 5.97 ± 0.20 | 2.089                   | 5.68 ± 0.58 |
| E-151    | 5.412                  | 5.27 ± 0.44 | 1.103                     | 5.96 ± 0.26 | 5.580                     | 5.25 ± 0.14 | >20                     | <4.70       |
| E-152    | 2.474                  | 5.61 ± 0.32 | 8.511                     | 5.07 ± 0.24 | >20                       | <4.70       | 10.471                  | 4.98 ± 0.28 |
| E-153    | 1.856                  | 5.73 ± 0.13 | 0.552                     | 6.26 ± 0.32 | 1.462                     | 5.84 ± 0.27 | 5.559                   | 5.26 ± 0.20 |
| E-154    | 0.589                  | 6.23 ± 0.39 | 0.181                     | 6.74 ± 0.35 | 1.675                     | 5.78 ± 0.25 | 1.357                   | 5.87 ± 0.40 |
| E-155    | 0.300                  | 6.52 ± 0.07 | 0.490                     | 6.31 ± 0.13 | 2.344                     | 5.63 ± 0.08 | 1.972                   | 5.71 ± 0.59 |
| E-156    | 0.671                  | 6.17 ± 0.31 | 0.209                     | 6.68 ± 0.08 | 1.344                     | 5.87 ± 0.26 | 0.437                   | 6.36 ± 0.16 |
| E-157    | 0.223                  | 6.65 ± 0.14 | 0.085                     | 7.07 ± 0.10 | 1.000                     | 6.00 ± 0.14 | 0.442                   | 6.35 ± 0.27 |
| E-158    | 0.226                  | 6.65 ± 0.18 | 0.093                     | 7.03 ± 0.34 | 1.318                     | 5.88 ± 0.06 | 0.858                   | 6.07 ± 0.06 |
| E-159    | 0.455                  | 6.34 ± 0.28 | 0.845                     | 6.07 ± 0.27 | 2.371                     | 5.63 ± 0.17 | 2.775                   | 5.56 ± 0.18 |
| E-160    | 1.182                  | 5.93 ± 0.33 | 2.474                     | 5.61 ± 0.09 | 11.092                    | 4.96 ± 0.25 | 3.508                   | 5.46 ± 0.12 |
| E-161    | 1.096                  | 5.96 ± 0.16 | 0.383                     | 6.42 ± 0.26 | 1.237                     | 5.91 ± 0.14 | 1.376                   | 5.86 ± 0.15 |
| E-162    | 1.573                  | 5.80 ± 0.24 | 3.548                     | 5.45 ± 0.20 | 10.715                    | 4.97 ± 0.00 | 2.455                   | 5.61 ± 0.00 |
| E-163    | 0.395                  | 6.40 ± 0.23 | 0.315                     | 6.50 ± 0.13 | 0.406                     | 6.39 ± 0.31 | 2.391                   | 5.62 ± 0.21 |
| F-101    | 8.710                  | 5.06 ± 0.00 | 1.472                     | 5.83 ± 0.13 | 2.344                     | 5.63 ± 0.36 | 10.116                  | 5.00 ± 0.30 |
| F-102    | 1.184                  | 5.93 ± 0.43 | 1.252                     | 5.90 ± 0.09 | 4.936                     | 5.31 ± 0.15 | 6.119                   | 5.21 ± 0.29 |
| F-103    | 0.724                  | 6.14 ± 0.26 | 0.437                     | 6.36 ± 0.26 | 0.258                     | 6.59 ± 0.18 | 0.372                   | 6.43 ± 0.25 |
| F-104    | 2.512                  | 5.60 ± 0.31 | 1.370                     | 5.86 ± 0.12 | 4.169                     | 5.38 ± 0.28 | >20                     | <4.70       |
| F-105    | 2.835                  | 5.55 ± 0.18 | 0.878                     | 6.06 ± 0.16 | 1.834                     | 5.74 ± 0.30 | 4.624                   | 5.34 ± 0.35 |
| F-106    | 5.642                  | 5.25 ± 0.15 | 2.273                     | 5.64 ± 0.06 | 5.934                     | 5.23 ± 0.34 | 12.589                  | 4.90 ± 0.20 |
| F-107    | 0.719                  | 6.14 ± 0.36 | 1.139                     | 5.94 ± 0.11 | 4.704                     | 5.33 ± 0.14 | 8.035                   | 5.10 ± 0.17 |
| F-108    | 1.514                  | 5.82 ± 0.34 | 1.905                     | 5.72 ± 0.08 | 14.289                    | 4.85 ± 0.14 | >20                     | <4.70       |
| F-109    | 1.941                  | 5.71 ± 0.15 | 0.898                     | 6.05 ± 0.21 | 4.390                     | 5.36 ± 0.14 | 14.289                  | 4.85 ± 0.14 |
| F-110    | 0.958                  | 6.02 ± 0.23 | 0.567                     | 6.25 ± 0.20 | 2.427                     | 5.62 ± 0.17 | 3.454                   | 5.46 ± 0.18 |
| F-111    | 5.297                  | 5.28 ± 0.23 | 3.408                     | 5.47 ± 0.05 | 3.784                     | 5.42 ± 0.28 | 1.023                   | 5.99 ± 0.50 |
| F-112    | 0.644                  | 6.19 ± 0.19 | 0.232                     | 6.64 ± 0.30 | 1.386                     | 5.86 ± 0.12 | 2.312                   | 5.64 ± 0.20 |
| F-113    | 1.387                  | 5.86 ± 0.28 | 0.703                     | 6.15 ± 0.27 | 2.335                     | 5.63 ± 0.09 | 2.477                   | 5.61 ± 0.19 |

**Table S3. Activity of 5-NI compounds against *Trichomonas vaginalis***

| Compound | MzS                    |             |                           |             | MzR                       |             |                         |             |
|----------|------------------------|-------------|---------------------------|-------------|---------------------------|-------------|-------------------------|-------------|
|          | <i>T. vaginalis</i> G3 |             | <i>T. vaginalis</i> F1623 |             | <i>T. vaginalis</i> B7268 |             | <i>T. vaginalis</i> LA1 |             |
|          | EC50 (μM)              | pEC50       | EC50 (μM)                 | pEC50       | EC50 (μM)                 | pEC50       | EC50 (μM)               | pEC50       |
| F-114    | 0.933                  | 6.03 ± 0.00 | 2.818                     | 5.55 ± 0.43 | 5.012                     | 5.30 ± 0.39 | 19.953                  | 4.70 ± 0.00 |
| F-115    | 4.043                  | 5.39 ± 0.32 | 1.561                     | 5.81 ± 0.25 | 3.032                     | 5.52 ± 0.18 | 3.373                   | 5.47 ± 0.32 |
| F-116    | 5.265                  | 5.28 ± 0.20 | 1.402                     | 5.85 ± 0.28 | 9.550                     | 5.02 ± 0.05 | 15.252                  | 4.82 ± 0.12 |
| F-117    | 1.122                  | 5.95 ± 0.24 | 0.251                     | 6.60 ± 0.10 | 0.579                     | 6.24 ± 0.07 | 0.700                   | 6.16 ± 0.30 |
| F-118    | 0.741                  | 6.13 ± 0.39 | 0.427                     | 6.37 ± 0.04 | 0.507                     | 6.30 ± 0.14 | 0.340                   | 6.47 ± 0.27 |
| F-119    | 6.865                  | 5.16 ± 0.13 | 1.634                     | 5.79 ± 0.14 | 1.950                     | 5.71 ± 0.33 | >20                     | <4.70       |
| F-120    | 5.370                  | 5.27 ± 0.25 | 6.792                     | 5.17 ± 0.09 | 0.531                     | 6.28 ± 0.47 | >20                     | <4.70       |
| F-121    | 3.447                  | 5.46 ± 0.17 | 2.867                     | 5.54 ± 0.07 | 14.371                    | 4.84 ± 0.08 | 14.791                  | 4.83 ± 0.13 |
| F-122    | 0.724                  | 6.14 ± 0.00 | 6.813                     | 5.17 ± 0.18 | >20                       | <4.70       | >20                     | <4.70       |
| F-123    | 3.251                  | 5.49 ± 0.21 | 4.677                     | 5.33 ± 0.04 | 1.274                     | 5.90 ± 0.30 | 14.454                  | 4.84 ± 0.14 |
| F-124    | 0.186                  | 6.73 ± 0.13 | 6.761                     | 5.17 ± 0.06 | >20                       | <4.70       | >20                     | <4.70       |
| F-125    | 7.586                  | 5.12 ± 0.00 | 5.188                     | 5.29 ± 0.16 | 8.414                     | 5.08 ± 0.38 | 7.943                   | 5.10 ± 0.40 |
| F-126    | 2.551                  | 5.59 ± 0.28 | 1.259                     | 5.90 ± 0.06 | 1.380                     | 5.86 ± 0.30 | 4.786                   | 5.32 ± 0.28 |
| F-127    | 0.741                  | 6.13 ± 0.27 | 0.928                     | 6.03 ± 0.32 | 0.856                     | 6.07 ± 0.22 | 1.023                   | 5.99 ± 0.45 |
| F-128    | 4.642                  | 5.33 ± 0.50 | 5.309                     | 5.28 ± 0.17 | 7.328                     | 5.14 ± 0.44 | 5.888                   | 5.23 ± 0.53 |
| F-129    | 1.641                  | 5.79 ± 0.43 | 6.095                     | 5.22 ± 0.35 | 1.669                     | 5.78 ± 0.64 | 4.677                   | 5.33 ± 0.63 |
| F-130    | 3.528                  | 5.45 ± 0.34 | 0.837                     | 6.08 ± 0.25 | 0.580                     | 6.24 ± 0.40 | 2.929                   | 5.53 ± 0.46 |
| F-131    | 1.093                  | 5.96 ± 0.17 | 0.485                     | 6.31 ± 0.17 | 1.308                     | 5.88 ± 0.14 | 1.622                   | 5.79 ± 0.23 |
| F-132    | 4.571                  | 5.34 ± 0.00 | 2.399                     | 5.62 ± 0.39 | >20                       | <4.70       | 4.050                   | 5.39 ± 0.43 |
| F-133    | 1.876                  | 5.73 ± 0.36 | 1.311                     | 5.88 ± 0.09 | 1.454                     | 5.84 ± 0.44 | 7.385                   | 5.13 ± 0.12 |
| F-134    | 1.738                  | 5.76 ± 0.11 | 0.600                     | 6.22 ± 0.18 | 2.531                     | 5.60 ± 0.20 | 1.437                   | 5.84 ± 0.24 |
| F-135    | 7.244                  | 5.14 ± 0.14 | 2.469                     | 5.61 ± 0.11 | 4.027                     | 5.40 ± 0.32 | >20                     | <4.70       |
| F-136    | 8.004                  | 5.10 ± 0.10 | 2.188                     | 5.66 ± 0.10 | 10.715                    | 4.97 ± 0.01 | 3.020                   | 5.52 ± 0.44 |
| F-137    | 0.884                  | 6.05 ± 0.34 | 2.057                     | 5.69 ± 0.40 | 7.413                     | 5.13 ± 0.00 | 13.490                  | 4.87 ± 0.17 |
| F-138    | 0.928                  | 6.03 ± 0.18 | 0.631                     | 6.20 ± 0.22 | 0.917                     | 6.04 ± 0.26 | 0.188                   | 6.73 ± 0.39 |
| F-139    | 0.619                  | 6.21 ± 0.41 | 0.570                     | 6.24 ± 0.25 | 2.333                     | 5.63 ± 0.13 | 2.385                   | 5.62 ± 0.36 |
| F-140    | 3.802                  | 5.42 ± 0.00 | 4.012                     | 5.40 ± 0.22 | 6.358                     | 5.20 ± 0.31 | >20                     | <4.70       |
| F-141    | 0.120                  | 6.92 ± 0.19 | 0.146                     | 6.84 ± 0.33 | 0.861                     | 6.07 ± 0.38 | 0.667                   | 6.18 ± 0.30 |
| F-142    | 6.358                  | 5.20 ± 0.08 | 1.950                     | 5.71 ± 0.13 | 1.000                     | 6.00 ± 0.44 | 5.866                   | 5.23 ± 0.33 |
| F-143    | 1.031                  | 5.99 ± 0.37 | 0.845                     | 6.07 ± 0.26 | 2.793                     | 5.55 ± 0.36 | 0.724                   | 6.14 ± 0.53 |
| F-144    | 4.047                  | 5.39 ± 0.37 | 2.205                     | 5.66 ± 0.12 | >20                       | <4.70       | 2.897                   | 5.54 ± 0.53 |
| F-145    | 5.470                  | 5.26 ± 0.23 | 3.020                     | 5.52 ± 0.15 | >20                       | <4.70       | 0.774                   | 6.11 ± 0.43 |
| F-146    | 0.457                  | 6.34 ± 0.20 | 0.277                     | 6.56 ± 0.39 | 0.252                     | 6.60 ± 0.06 | 1.122                   | 5.95 ± 0.38 |
| F-147    | 2.089                  | 5.68 ± 0.39 | 1.208                     | 5.92 ± 0.43 | 6.879                     | 5.16 ± 0.36 | 2.512                   | 5.60 ± 0.34 |
| F-148    | 0.258                  | 6.59 ± 0.20 | 0.166                     | 6.78 ± 0.18 | 0.439                     | 6.36 ± 0.16 | 0.799                   | 6.10 ± 0.17 |
| F-149    | 0.081                  | 7.09 ± 0.43 | 0.441                     | 6.36 ± 0.33 | 0.832                     | 6.08 ± 0.24 | 0.805                   | 6.09 ± 0.21 |
| F-150    | 0.372                  | 6.43 ± 0.24 | 0.240                     | 6.62 ± 0.10 | 0.525                     | 6.28 ± 0.17 | 1.851                   | 5.73 ± 0.26 |
| F-151    | 0.369                  | 6.43 ± 0.57 | 0.665                     | 6.18 ± 0.25 | 1.298                     | 5.89 ± 0.27 | 7.943                   | 5.10 ± 0.24 |
| F-152    | 2.797                  | 5.55 ± 0.35 | 2.023                     | 5.69 ± 0.08 | 19.953                    | 4.70 ± 0.00 | 2.767                   | 5.56 ± 0.34 |
| F-153    | 0.631                  | 6.20 ± 0.51 | 0.058                     | 7.24 ± 0.44 | 0.337                     | 6.47 ± 0.20 | 1.281                   | 5.89 ± 0.41 |
| F-154    | 0.490                  | 6.31 ± 0.37 | 0.552                     | 6.26 ± 0.32 | 0.283                     | 6.55 ± 0.32 | 0.798                   | 6.10 ± 0.39 |
| F-155    | 0.112                  | 6.95 ± 0.34 | 1.514                     | 5.82 ± 0.52 | 0.828                     | 6.08 ± 0.38 | 1.148                   | 5.94 ± 0.43 |
| F-156    | 0.136                  | 6.87 ± 0.34 | 0.110                     | 6.96 ± 0.30 | 0.578                     | 6.24 ± 0.41 | 0.562                   | 6.25 ± 0.27 |
| F-157    | 0.227                  | 6.64 ± 0.19 | 0.116                     | 6.93 ± 0.20 | 0.447                     | 6.35 ± 0.34 | 0.646                   | 6.19 ± 0.23 |
| F-158    | 1.472                  | 5.83 ± 0.12 | 0.363                     | 6.44 ± 0.02 | 3.311                     | 5.48 ± 0.25 | 1.023                   | 5.99 ± 0.12 |
| F-159    | 11.858                 | 4.93 ± 0.02 | 2.388                     | 5.62 ± 0.14 | >20                       | <4.70       | 4.130                   | 5.38 ± 0.45 |
| F-160    | 11.307                 | 4.95 ± 0.14 | 3.548                     | 5.45 ± 0.16 | >20                       | <4.70       | 6.531                   | 5.19 ± 0.16 |

**Table S3. Activity of 5-NI compounds against *Trichomonas vaginalis***

| Compound | MzS                    |                 |                           |                 | MzR                       |                 |                         |                 |
|----------|------------------------|-----------------|---------------------------|-----------------|---------------------------|-----------------|-------------------------|-----------------|
|          | <i>T. vaginalis</i> G3 |                 | <i>T. vaginalis</i> F1623 |                 | <i>T. vaginalis</i> B7268 |                 | <i>T. vaginalis</i> LA1 |                 |
|          | EC50 ( $\mu$ M)        | pEC50           | EC50 ( $\mu$ M)           | pEC50           | EC50 ( $\mu$ M)           | pEC50           | EC50 ( $\mu$ M)         | pEC50           |
| F-161    | 3.192                  | 5.50 $\pm$ 0.25 | 1.679                     | 5.78 $\pm$ 0.03 | 2.007                     | 5.70 $\pm$ 0.21 | 4.416                   | 5.36 $\pm$ 0.19 |
| F-162    | 3.831                  | 5.42 $\pm$ 0.23 | 2.651                     | 5.58 $\pm$ 0.02 | 9.441                     | 5.03 $\pm$ 0.03 | 4.624                   | 5.34 $\pm$ 0.28 |
| F-163    | 0.268                  | 6.57 $\pm$ 0.32 | 0.473                     | 6.33 $\pm$ 0.23 | 0.764                     | 6.12 $\pm$ 0.17 | 7.189                   | 5.14 $\pm$ 0.28 |

Activity against two Mz-sensitive (MzS) and two Mz-resistant (MzR) isolates of *T. vaginalis* was determined as EC50 (in  $\mu$ M; geometric mean, n=3-6 experiments), the compound concentration that inhibits parasite growth by 50%, and is also shown as negative log10 value of the EC50 (pEC50; mean  $\pm$  SE, n=3-6 experiments).



**Table S4. Activity of 5-NI compounds against anaerobic bacteria**

| Compound | <i>H. pylori</i> SS1 |             | <i>H. pylori</i> CS22 |             | <i>H. pylori</i> <i>ΔfrxA ΔrdxA</i> |             | <i>C. difficile</i> ATCC9689 |             | <i>B. fragilis</i> ATCC25285 |             |
|----------|----------------------|-------------|-----------------------|-------------|-------------------------------------|-------------|------------------------------|-------------|------------------------------|-------------|
|          | EC50 (μM)            | pEC50       | EC50 (μM)             | pEC50       | EC50 (μM)                           | pEC50       | EC50 (μM)                    | pEC50       | EC50 (μM)                    | pEC50       |
| Mz       | 2.00                 | 5.70 ± 0.01 | 8.91                  | 5.05 ± 0.02 | 169.82                              | 3.77 ± 0.05 | 2.09                         | 5.68 ± 0.01 | 14.10                        | 4.85 ± 0.01 |
| A-101    | 4.86                 | 5.31 ± 0.08 | 15.85                 | 4.80 ± 0.09 | > 20                                | < 4.70      | 7.59                         | 5.12 ± 0.13 | > 20                         | < 4.70      |
| A-102    | 0.55                 | 6.26 ± 0.11 | 1.85                  | 5.73 ± 0.31 | > 20                                | < 4.70      | 4.68                         | 5.33 ± 0.17 | > 20                         | < 4.70      |
| A-103    | 2.15                 | 5.67 ± 0.14 | 3.89                  | 5.41 ± 0.28 | > 20                                | < 4.70      | 3.95                         | 5.40 ± 0.19 | > 20                         | < 4.70      |
| A-104    | 5.62                 | 5.25 ± 0.05 | 3.49                  | 5.46 ± 0.23 | > 20                                | < 4.70      | 11.39                        | 4.94 ± 0.02 | > 20                         | < 4.70      |
| A-105    | 1.54                 | 5.81 ± 0.15 | 2.24                  | 5.65 ± 0.19 | > 20                                | < 4.70      | 7.19                         | 5.14 ± 0.18 | > 20                         | < 4.70      |
| A-106    | 1.83                 | 5.74 ± 0.12 | 4.14                  | 5.38 ± 0.09 | > 20                                | < 4.70      | 7.30                         | 5.14 ± 0.19 | > 20                         | < 4.70      |
| A-107    | 2.24                 | 5.65 ± 0.04 | 6.76                  | 5.17 ± 0.16 | > 20                                | < 4.70      | 6.92                         | 5.16 ± 0.18 | > 20                         | < 4.70      |
| A-108    | 2.03                 | 5.69 ± 0.16 | 2.12                  | 5.67 ± 0.36 | > 20                                | < 4.70      | 7.59                         | 5.12 ± 0.18 | > 20                         | < 4.70      |
| A-109    | 1.40                 | 5.85 ± 0.18 | 2.51                  | 5.60 ± 0.23 | > 20                                | < 4.70      | 11.66                        | 4.93 ± 0.01 | > 20                         | < 4.70      |
| A-110    | 1.21                 | 5.92 ± 0.20 | 2.44                  | 5.61 ± 0.30 | > 20                                | < 4.70      | 11.84                        | 4.93 ± 0.01 | > 20                         | < 4.70      |
| A-111    | 4.30                 | 5.37 ± 0.20 | 16.98                 | 4.77 ± 0.10 | > 20                                | < 4.70      | 4.94                         | 5.31 ± 0.20 | > 20                         | < 4.70      |
| A-112    | 0.51                 | 6.30 ± 0.17 | 0.79                  | 6.10 ± 0.14 | > 20                                | < 4.70      | 7.64                         | 5.12 ± 0.17 | > 20                         | < 4.70      |
| A-113    | 4.71                 | 5.33 ± 0.21 | 2.63                  | 5.58 ± 0.20 | > 20                                | < 4.70      | 4.27                         | 5.37 ± 0.21 | > 20                         | < 4.70      |
| A-114    | > 20                 | < 4.70      | 17.67                 | 4.75 ± 0.14 | > 20                                | < 4.70      | 6.31                         | 5.20 ± 0.17 | > 20                         | < 4.70      |
| A-115    | > 20                 | < 4.70      | 16.38                 | 4.79 ± 0.23 | > 20                                | < 4.70      | 4.43                         | 5.35 ± 0.20 | > 20                         | < 4.70      |
| A-116    | 3.69                 | 5.43 ± 0.05 | 18.44                 | 4.73 ± 0.09 | > 20                                | < 4.70      | 4.40                         | 5.36 ± 0.19 | > 20                         | < 4.70      |
| A-117    | 3.14                 | 5.50 ± 0.08 | 7.36                  | 5.13 ± 0.43 | > 20                                | < 4.70      | 4.07                         | 5.39 ± 0.23 | 18.91                        | 4.72 ± 0.02 |
| A-118    | 4.11                 | 5.39 ± 0.05 | 5.89                  | 5.23 ± 0.22 | > 20                                | < 4.70      | 4.54                         | 5.34 ± 0.20 | 14.91                        | 4.83 ± 0.08 |
| A-119    | 1.66                 | 5.78 ± 0.18 | 7.12                  | 5.15 ± 0.19 | > 20                                | < 4.70      | 6.61                         | 5.18 ± 0.20 | > 20                         | < 4.70      |
| A-120    | 2.80                 | 5.55 ± 0.11 | 10.72                 | 4.97 ± 0.43 | > 20                                | < 4.70      | 9.70                         | 5.01 ± 0.05 | > 20                         | < 4.70      |
| A-121    | 0.77                 | 6.11 ± 0.25 | 3.14                  | 5.50 ± 0.29 | > 20                                | < 4.70      | 4.50                         | 5.35 ± 0.19 | > 20                         | < 4.70      |
| A-122    | 1.48                 | 5.83 ± 0.16 | 6.71                  | 5.17 ± 0.16 | > 20                                | < 4.70      | 10.47                        | 4.98 ± 0.03 | > 20                         | < 4.70      |
| A-123    | 2.95                 | 5.53 ± 0.09 | 9.70                  | 5.01 ± 0.15 | > 20                                | < 4.70      | 2.47                         | 5.61 ± 0.02 | > 20                         | < 4.70      |
| A-124    | 3.60                 | 5.44 ± 0.14 | 10.67                 | 4.97 ± 0.43 | > 20                                | < 4.70      | 11.13                        | 4.95 ± 0.02 | > 20                         | < 4.70      |
| A-125    | 12.78                | 4.89 ± 0.05 | 19.68                 | 4.71 ± 0.01 | > 20                                | < 4.70      | 12.30                        | 4.91 ± 0.21 | > 20                         | < 4.70      |
| A-126    | 2.24                 | 5.65 ± 0.22 | 4.47                  | 5.35 ± 0.14 | > 20                                | < 4.70      | 11.22                        | 4.95 ± 0.02 | > 20                         | < 4.70      |
| A-127    | 0.71                 | 6.15 ± 0.15 | 8.25                  | 5.08 ± 0.25 | > 20                                | < 4.70      | 2.82                         | 5.55 ± 0.06 | > 20                         | < 4.70      |
| A-128    | 2.17                 | 5.66 ± 0.20 | > 20                  | < 4.70      | > 20                                | < 4.70      | 2.67                         | 5.57 ± 0.05 | > 20                         | < 4.70      |
| A-129    | 2.14                 | 5.67 ± 0.17 | > 20                  | < 4.70      | > 20                                | < 4.70      | 2.78                         | 5.56 ± 0.35 | > 20                         | < 4.70      |
| A-130    | 0.85                 | 6.07 ± 0.18 | > 20                  | < 4.70      | > 20                                | < 4.70      | 1.46                         | 5.84 ± 0.16 | > 20                         | < 4.70      |
| A-131    | 5.33                 | 5.27 ± 0.20 | 9.82                  | 5.01 ± 0.37 | > 20                                | < 4.70      | 2.38                         | 5.62 ± 0.40 | > 20                         | < 4.70      |
| A-132    | 11.31                | 4.95 ± 0.04 | 14.45                 | 4.84 ± 0.04 | > 20                                | < 4.70      | 5.67                         | 5.25 ± 0.37 | > 20                         | < 4.70      |
| A-133    | 1.93                 | 5.71 ± 0.23 | 1.79                  | 5.75 ± 0.09 | > 20                                | < 4.70      | 5.17                         | 5.29 ± 0.35 | > 20                         | < 4.70      |
| A-134    | 1.51                 | 5.82 ± 0.11 | 7.36                  | 5.13 ± 0.03 | > 20                                | < 4.70      | 2.80                         | 5.55 ± 0.37 | > 20                         | < 4.70      |
| A-135    | 0.94                 | 6.03 ± 0.11 | 18.06                 | 4.74 ± 0.01 | > 20                                | < 4.70      | 0.72                         | 6.14 ± 0.23 | 8.51                         | 5.07 ± 0.22 |
| A-136    | 1.85                 | 5.73 ± 0.18 | 11.57                 | 4.94 ± 0.08 | > 20                                | < 4.70      | 4.27                         | 5.37 ± 0.23 | > 20                         | < 4.70      |
| A-137    | 0.89                 | 6.05 ± 0.06 | 17.78                 | 4.75 ± 0.09 | > 20                                | < 4.70      | 4.97                         | 5.30 ± 0.19 | 15.14                        | 4.82 ± 0.11 |
| A-138    | 0.34                 | 6.47 ± 0.19 | 2.55                  | 5.59 ± 0.16 | > 20                                | < 4.70      | 4.27                         | 5.37 ± 0.23 | > 20                         | < 4.70      |
| A-139    | 0.26                 | 6.58 ± 0.19 | 1.19                  | 5.92 ± 0.09 | > 20                                | < 4.70      | 4.54                         | 5.34 ± 0.21 | > 20                         | < 4.70      |
| A-140    | 0.50                 | 6.30 ± 0.13 | 3.89                  | 5.41 ± 0.04 | > 20                                | < 4.70      | 4.27                         | 5.37 ± 0.20 | > 20                         | < 4.70      |
| A-141    | 0.44                 | 6.35 ± 0.19 | 7.99                  | 5.10 ± 0.10 | > 20                                | < 4.70      | 2.65                         | 5.58 ± 0.04 | > 20                         | < 4.70      |
| A-142    | 0.99                 | 6.00 ± 0.12 | 8.22                  | 5.09 ± 0.36 | > 20                                | < 4.70      | 10.80                        | 4.97 ± 0.02 | > 20                         | < 4.70      |
| A-143    | 0.52                 | 6.28 ± 0.18 | 2.71                  | 5.57 ± 0.36 | > 20                                | < 4.70      | 2.78                         | 5.56 ± 0.03 | > 20                         | < 4.70      |
| A-144    | 3.00                 | 5.52 ± 0.15 | 19.57                 | 4.71 ± 0.02 | > 20                                | < 4.70      | 7.13                         | 5.15 ± 0.19 | > 20                         | < 4.70      |
| A-145    | 9.12                 | 5.04 ± 0.10 | 13.39                 | 4.87 ± 0.25 | > 20                                | < 4.70      | 9.05                         | 5.04 ± 0.08 | > 20                         | < 4.70      |
| A-146    | 7.08                 | 5.15 ± 0.12 | 8.22                  | 5.09 ± 0.17 | > 20                                | < 4.70      | 3.98                         | 5.40 ± 0.22 | > 20                         | < 4.70      |
| A-147    | 1.00                 | 6.00 ± 0.25 | 4.79                  | 5.32 ± 0.26 | > 20                                | < 4.70      | 13.39                        | 4.87 ± 0.09 | > 20                         | < 4.70      |
| A-148    | 0.47                 | 6.33 ± 0.14 | 1.92                  | 5.72 ± 0.21 | > 20                                | < 4.70      | 2.93                         | 5.53 ± 0.24 | > 20                         | < 4.70      |
| A-149    | 0.44                 | 6.35 ± 0.18 | 2.60                  | 5.59 ± 0.11 | > 20                                | < 4.70      | 8.07                         | 5.09 ± 0.27 | > 20                         | < 4.70      |
| A-150    | 2.22                 | 5.65 ± 0.22 | 9.72                  | 5.01 ± 0.11 | > 20                                | < 4.70      | 5.67                         | 5.25 ± 0.28 | > 20                         | < 4.70      |
| A-151    | 6.07                 | 5.22 ± 0.15 | 6.49                  | 5.19 ± 0.31 | > 20                                | < 4.70      | 3.98                         | 5.40 ± 0.22 | > 20                         | < 4.70      |
| A-152    | 11.05                | 4.96 ± 0.03 | 12.40                 | 4.91 ± 0.36 | > 20                                | < 4.70      | 10.63                        | 4.97 ± 0.01 | > 20                         | < 4.70      |
| A-153    | 2.12                 | 5.67 ± 0.28 | 2.65                  | 5.58 ± 0.39 | > 20                                | < 4.70      | 11.05                        | 4.96 ± 0.00 | > 20                         | < 4.70      |
| A-154    | 0.39                 | 6.41 ± 0.14 | 2.77                  | 5.56 ± 0.25 | > 20                                | < 4.70      | 4.30                         | 5.37 ± 0.20 | > 20                         | < 4.70      |
| A-155    | 0.49                 | 6.31 ± 0.28 | 2.57                  | 5.59 ± 0.13 | > 20                                | < 4.70      | 4.23                         | 5.37 ± 0.22 | > 20                         | < 4.70      |

**Table S4. Activity of 5-NI compounds against anaerobic bacteria**

| Compound | <i>H. pylori</i> SS1 |             | <i>H. pylori</i> CS22 |             | <i>H. pylori</i> <i>ΔfrxA ΔrdxA</i> |        | <i>C. difficile</i> ATCC9689 |             | <i>B. fragilis</i> ATCC25285 |             |
|----------|----------------------|-------------|-----------------------|-------------|-------------------------------------|--------|------------------------------|-------------|------------------------------|-------------|
|          | EC50 (μM)            | pEC50       | EC50 (μM)             | pEC50       | EC50 (μM)                           | pEC50  | EC50 (μM)                    | pEC50       | EC50 (μM)                    | pEC50       |
| A-156    | 0.55                 | 6.26 ± 0.17 | 2.78                  | 5.56 ± 0.23 | > 20                                | < 4.70 | 5.25                         | 5.28 ± 0.17 | > 20                         | < 4.70      |
| A-157    | 0.67                 | 6.18 ± 0.21 | 1.05                  | 5.98 ± 0.50 | > 20                                | < 4.70 | 9.77                         | 5.01 ± 0.03 | > 20                         | < 4.70      |
| A-158    | 0.32                 | 6.50 ± 0.21 | 1.08                  | 5.97 ± 0.23 | > 20                                | < 4.70 | 2.17                         | 5.66 ± 0.05 | > 20                         | < 4.70      |
| A-159    | 0.96                 | 6.02 ± 0.18 | 1.89                  | 5.72 ± 0.32 | > 20                                | < 4.70 | 2.22                         | 5.65 ± 0.02 | > 20                         | < 4.70      |
| A-160    | 0.87                 | 6.06 ± 0.22 | 4.23                  | 5.37 ± 0.07 | > 20                                | < 4.70 | 11.05                        | 4.96 ± 0.00 | > 20                         | < 4.70      |
| A-161    | 1.61                 | 5.79 ± 0.16 | 19.50                 | 4.71 ± 0.02 | > 20                                | < 4.70 | 1.56                         | 5.81 ± 0.11 | > 20                         | < 4.70      |
| A-162    | 1.21                 | 5.92 ± 0.20 | 2.69                  | 5.57 ± 0.02 | > 20                                | < 4.70 | 4.23                         | 5.37 ± 0.20 | > 20                         | < 4.70      |
| A-163    | 1.15                 | 5.94 ± 0.23 | 2.41                  | 5.62 ± 0.08 | > 20                                | < 4.70 | 1.50                         | 5.82 ± 0.17 | > 20                         | < 4.70      |
| B-101    | 1.65                 | 5.78 ± 0.22 | 15.25                 | 4.82 ± 0.19 | > 20                                | < 4.70 | 5.13                         | 5.29 ± 0.28 | > 20                         | < 4.70      |
| B-102    | 4.30                 | 5.37 ± 0.11 | > 20                  | < 4.70      | > 20                                | < 4.70 | 5.32                         | 5.27 ± 0.21 | > 20                         | < 4.70      |
| B-103    | 0.51                 | 6.30 ± 0.22 | > 20                  | < 4.70      | > 20                                | < 4.70 | 4.14                         | 5.38 ± 0.25 | > 20                         | < 4.70      |
| B-104    | 2.71                 | 5.57 ± 0.02 | 16.50                 | 4.78 ± 0.16 | > 20                                | < 4.70 | 9.23                         | 5.04 ± 0.08 | > 20                         | < 4.70      |
| B-105    | 3.98                 | 5.40 ± 0.06 | 17.89                 | 4.75 ± 0.07 | > 20                                | < 4.70 | 9.94                         | 5.00 ± 0.05 | > 20                         | < 4.70      |
| B-106    | 4.20                 | 5.38 ± 0.04 | 19.39                 | 4.71 ± 0.02 | > 20                                | < 4.70 | 7.76                         | 5.11 ± 0.16 | > 20                         | < 4.70      |
| B-107    | 3.02                 | 5.52 ± 0.02 | 17.99                 | 4.75 ± 0.08 | > 20                                | < 4.70 | 3.35                         | 5.48 ± 0.23 | > 20                         | < 4.70      |
| B-108    | 7.47                 | 5.13 ± 0.15 | 19.57                 | 4.71 ± 0.02 | > 20                                | < 4.70 | 4.20                         | 5.38 ± 0.21 | > 20                         | < 4.70      |
| B-109    | 8.00                 | 5.10 ± 0.05 | > 20                  | < 4.70      | > 20                                | < 4.70 | 10.88                        | 4.96 ± 0.03 | > 20                         | < 4.70      |
| B-110    | 4.37                 | 5.36 ± 0.12 | 17.05                 | 4.77 ± 0.12 | > 20                                | < 4.70 | 11.31                        | 4.95 ± 0.02 | > 20                         | < 4.70      |
| B-111    | 4.01                 | 5.40 ± 0.13 | 13.57                 | 4.87 ± 0.15 | > 20                                | < 4.70 | 7.64                         | 5.12 ± 0.19 | > 20                         | < 4.70      |
| B-112    | 6.66                 | 5.18 ± 0.01 | 16.88                 | 4.77 ± 0.14 | > 20                                | < 4.70 | 12.21                        | 4.91 ± 0.05 | > 20                         | < 4.70      |
| B-113    | 3.11                 | 5.51 ± 0.03 | 6.24                  | 5.21 ± 0.27 | > 20                                | < 4.70 | 10.80                        | 4.97 ± 0.01 | > 20                         | < 4.70      |
| B-114    | 11.05                | 4.96 ± 0.01 | 17.62                 | 4.75 ± 0.12 | > 20                                | < 4.70 | 6.17                         | 5.21 ± 0.18 | > 20                         | < 4.70      |
| B-115    | 11.22                | 4.95 ± 0.01 | 19.77                 | 4.70 ± 0.01 | > 20                                | < 4.70 | 4.14                         | 5.38 ± 0.23 | > 20                         | < 4.70      |
| B-116    | 1.27                 | 5.90 ± 0.01 | 18.09                 | 4.74 ± 0.09 | > 20                                | < 4.70 | 6.56                         | 5.18 ± 0.22 | > 20                         | < 4.70      |
| B-117    | 2.33                 | 5.63 ± 0.04 | 9.62                  | 5.02 ± 0.35 | > 20                                | < 4.70 | 13.49                        | 4.87 ± 0.09 | > 20                         | < 4.70      |
| B-118    | 0.68                 | 6.17 ± 0.13 | > 20                  | < 4.70      | > 20                                | < 4.70 | 16.22                        | 4.79 ± 0.09 | > 20                         | < 4.70      |
| B-119    | 8.07                 | 5.09 ± 0.11 | > 20                  | < 4.70      | > 20                                | < 4.70 | 10.88                        | 4.96 ± 0.02 | > 20                         | < 4.70      |
| B-120    | 2.29                 | 5.64 ± 0.14 | 11.42                 | 4.94 ± 0.25 | > 20                                | < 4.70 | 3.63                         | 5.44 ± 0.20 | > 20                         | < 4.70      |
| B-121    | 4.37                 | 5.36 ± 0.11 | 16.85                 | 4.77 ± 0.18 | > 20                                | < 4.70 | 3.74                         | 5.43 ± 0.19 | > 20                         | < 4.70      |
| B-122    | 1.33                 | 5.88 ± 0.07 | 7.08                  | 5.15 ± 0.24 | > 20                                | < 4.70 | 10.39                        | 4.98 ± 0.03 | > 20                         | < 4.70      |
| B-123    | 0.26                 | 6.58 ± 0.13 | 1.73                  | 5.76 ± 0.33 | > 20                                | < 4.70 | 0.78                         | 6.11 ± 0.02 | > 20                         | < 4.70      |
| B-124    | 0.91                 | 6.04 ± 0.07 | 5.62                  | 5.25 ± 0.39 | > 20                                | < 4.70 | 10.55                        | 4.98 ± 0.02 | > 20                         | < 4.70      |
| B-125    | 5.25                 | 5.28 ± 0.10 | 16.72                 | 4.78 ± 0.11 | > 20                                | < 4.70 | 13.08                        | 4.88 ± 0.09 | > 20                         | < 4.70      |
| B-126    | 2.95                 | 5.53 ± 0.05 | 15.00                 | 4.82 ± 0.20 | > 20                                | < 4.70 | 10.23                        | 4.99 ± 0.01 | > 20                         | < 4.70      |
| B-127    | 0.48                 | 6.32 ± 0.09 | 1.78                  | 5.75 ± 0.15 | > 20                                | < 4.70 | 10.00                        | 5.00 ± 0.03 | > 20                         | < 4.70      |
| B-128    | 0.76                 | 6.12 ± 0.08 | > 20                  | < 4.70      | > 20                                | < 4.70 | 8.45                         | 5.07 ± 0.06 | > 20                         | < 4.70      |
| B-129    | 2.43                 | 5.62 ± 0.15 | 4.47                  | 5.35 ± 0.35 | > 20                                | < 4.70 | 4.04                         | 5.39 ± 0.17 | 14.96                        | 4.83 ± 0.13 |
| B-130    | 0.74                 | 6.13 ± 0.18 | 16.22                 | 4.79 ± 0.12 | > 20                                | < 4.70 | 2.04                         | 5.69 ± 0.39 | > 20                         | < 4.70      |
| B-131    | 0.55                 | 6.26 ± 0.13 | 19.16                 | 4.72 ± 0.03 | > 20                                | < 4.70 | 3.04                         | 5.52 ± 0.04 | > 20                         | < 4.70      |
| B-132    | 6.03                 | 5.22 ± 0.15 | 6.92                  | 5.16 ± 0.26 | > 20                                | < 4.70 | 7.82                         | 5.11 ± 0.13 | > 20                         | < 4.70      |
| B-133    | 2.06                 | 5.69 ± 0.21 | 11.28                 | 4.95 ± 0.26 | > 20                                | < 4.70 | 6.81                         | 5.17 ± 0.20 | > 20                         | < 4.70      |
| B-134    | 1.63                 | 5.79 ± 0.14 | 11.48                 | 4.94 ± 0.32 | > 20                                | < 4.70 | 11.57                        | 4.94 ± 0.02 | > 20                         | < 4.70      |
| B-135    | 0.82                 | 6.09 ± 0.17 | 1.97                  | 5.71 ± 0.28 | > 20                                | < 4.70 | 5.05                         | 5.30 ± 0.20 | 15.67                        | 4.81 ± 0.11 |
| B-136    | 0.91                 | 6.04 ± 0.05 | 13.06                 | 4.88 ± 0.27 | > 20                                | < 4.70 | 1.23                         | 5.91 ± 0.31 | > 20                         | < 4.70      |
| B-137    | 1.18                 | 5.93 ± 0.13 | 18.84                 | 4.73 ± 0.05 | > 20                                | < 4.70 | 4.61                         | 5.34 ± 0.19 | > 20                         | < 4.70      |
| B-138    | 3.34                 | 5.48 ± 0.07 | > 20                  | < 4.70      | > 20                                | < 4.70 | 11.31                        | 4.95 ± 0.02 | > 20                         | < 4.70      |
| B-139    | 1.56                 | 5.81 ± 0.11 | 10.96                 | 4.96 ± 0.29 | > 20                                | < 4.70 | 7.03                         | 5.15 ± 0.10 | > 20                         | < 4.70      |
| B-140    | 6.81                 | 5.17 ± 0.21 | > 20                  | < 4.70      | > 20                                | < 4.70 | 12.30                        | 4.91 ± 0.03 | > 20                         | < 4.70      |
| B-141    | 4.01                 | 5.40 ± 0.21 | 12.40                 | 4.91 ± 0.18 | > 20                                | < 4.70 | 11.22                        | 4.95 ± 0.00 | > 20                         | < 4.70      |
| B-142    | 2.80                 | 5.55 ± 0.08 | 19.23                 | 4.72 ± 0.04 | > 20                                | < 4.70 | 10.15                        | 4.99 ± 0.04 | > 20                         | < 4.70      |
| B-143    | 3.02                 | 5.52 ± 0.06 | 17.48                 | 4.76 ± 0.12 | > 20                                | < 4.70 | 11.31                        | 4.95 ± 0.02 | > 20                         | < 4.70      |
| B-144    | 5.93                 | 5.23 ± 0.05 | 16.72                 | 4.78 ± 0.13 | > 20                                | < 4.70 | 10.55                        | 4.98 ± 0.01 | > 20                         | < 4.70      |
| B-145    | 9.77                 | 5.01 ± 0.09 | > 20                  | < 4.70      | > 20                                | < 4.70 | 14.02                        | 4.85 ± 0.08 | > 20                         | < 4.70      |
| B-146    | 0.87                 | 6.06 ± 0.11 | 14.07                 | 4.85 ± 0.37 | > 20                                | < 4.70 | 16.98                        | 4.77 ± 0.06 | > 20                         | < 4.70      |
| B-147    | 10.84                | 4.97 ± 0.05 | 15.31                 | 4.82 ± 0.20 | > 20                                | < 4.70 | 17.11                        | 4.77 ± 0.07 | > 20                         | < 4.70      |
| B-148    | 2.45                 | 5.61 ± 0.26 | 3.36                  | 5.47 ± 0.70 | > 20                                | < 4.70 | 15.02                        | 4.82 ± 0.07 | > 20                         | < 4.70      |

**Table S4. Activity of 5-NI compounds against anaerobic bacteria**

| Compound | <i>H. pylori</i> SS1 |                 | <i>H. pylori</i> CS22 |                 | <i>H. pylori</i> $\Delta$ <i>frxA</i> $\Delta$ <i>rdxA</i> |                 | <i>C. difficile</i> ATCC9689 |                 | <i>B. fragilis</i> ATCC25285 |                 |
|----------|----------------------|-----------------|-----------------------|-----------------|------------------------------------------------------------|-----------------|------------------------------|-----------------|------------------------------|-----------------|
|          | EC50 ( $\mu$ M)      | pEC50           | EC50 ( $\mu$ M)       | pEC50           | EC50 ( $\mu$ M)                                            | pEC50           | EC50 ( $\mu$ M)              | pEC50           | EC50 ( $\mu$ M)              | pEC50           |
| B-149    | 8.61                 | 5.07 $\pm$ 0.02 | 13.11                 | 4.88 $\pm$ 0.23 | > 20                                                       | < 4.70          | 17.25                        | 4.76 $\pm$ 0.06 | > 20                         | < 4.70          |
| B-150    | 10.12                | 5.00 $\pm$ 0.06 | > 20                  | < 4.70          | > 20                                                       | < 4.70          | > 20                         | < 4.70          | > 20                         | < 4.70          |
| B-151    | 1.08                 | 5.97 $\pm$ 0.00 | 3.49                  | 5.46 $\pm$ 0.42 | 14.45                                                      | 4.84 $\pm$ 0.12 | 10.39                        | 4.98 $\pm$ 0.04 | > 20                         | < 4.70          |
| B-152    | 1.93                 | 5.71 $\pm$ 0.07 | > 20                  | < 4.70          | > 20                                                       | < 4.70          | 6.17                         | 5.21 $\pm$ 0.13 | > 20                         | < 4.70          |
| B-153    | 10.55                | 4.98 $\pm$ 0.03 | > 20                  | < 4.70          | > 20                                                       | < 4.70          | > 20                         | < 4.70          | > 20                         | < 4.70          |
| B-154    | 1.93                 | 5.71 $\pm$ 0.11 | 11.61                 | 4.94 $\pm$ 0.27 | > 20                                                       | < 4.70          | > 20                         | < 4.70          | > 20                         | < 4.70          |
| B-155    | 2.38                 | 5.62 $\pm$ 0.32 | 8.22                  | 5.09 $\pm$ 0.27 | > 20                                                       | < 4.70          | 8.38                         | 5.08 $\pm$ 0.14 | > 20                         | < 4.70          |
| B-156    | 4.12                 | 5.39 $\pm$ 0.44 | 9.33                  | 5.03 $\pm$ 0.16 | > 20                                                       | < 4.70          | 11.48                        | 4.94 $\pm$ 0.01 | > 20                         | < 4.70          |
| B-157    | 6.71                 | 5.17 $\pm$ 0.17 | > 20                  | < 4.70          | > 20                                                       | < 4.70          | 15.49                        | 4.81 $\pm$ 0.06 | > 20                         | < 4.70          |
| B-158    | 1.66                 | 5.78 $\pm$ 0.19 | 7.12                  | 5.15 $\pm$ 0.48 | > 20                                                       | < 4.70          | 7.70                         | 5.11 $\pm$ 0.16 | > 20                         | < 4.70          |
| B-159    | 2.04                 | 5.69 $\pm$ 0.04 | > 20                  | < 4.70          | > 20                                                       | < 4.70          | 4.75                         | 5.32 $\pm$ 0.19 | > 20                         | < 4.70          |
| B-160    | > 20                 | < 4.70          | > 20                  | < 4.70          | > 20                                                       | < 4.70          | 17.11                        | 4.77 $\pm$ 0.07 | > 20                         | < 4.70          |
| B-161    | 3.52                 | 5.45 $\pm$ 0.17 | 18.68                 | 4.73 $\pm$ 0.08 | > 20                                                       | < 4.70          | 6.71                         | 5.17 $\pm$ 0.17 | > 20                         | < 4.70          |
| B-162    | 1.22                 | 5.91 $\pm$ 0.16 | 15.85                 | 4.80 $\pm$ 0.17 | > 20                                                       | < 4.70          | 5.37                         | 5.27 $\pm$ 0.21 | 19.50                        | 4.71 $\pm$ 0.01 |
| B-163    | 1.31                 | 5.88 $\pm$ 0.20 | > 20                  | < 4.70          | > 20                                                       | < 4.70          | 6.97                         | 5.16 $\pm$ 0.20 | > 20                         | < 4.70          |
| C-101    | 0.80                 | 6.10 $\pm$ 0.19 | 19.69                 | 4.71 $\pm$ 0.02 | > 20                                                       | < 4.70          | 2.40                         | 5.62 $\pm$ 0.03 | > 20                         | < 4.70          |
| C-102    | 2.55                 | 5.59 $\pm$ 0.03 | > 20                  | < 4.70          | > 20                                                       | < 4.70          | 2.12                         | 5.67 $\pm$ 0.04 | > 20                         | < 4.70          |
| C-103    | 1.78                 | 5.75 $\pm$ 0.09 | 6.07                  | 5.22 $\pm$ 0.21 | > 20                                                       | < 4.70          | 2.09                         | 5.68 $\pm$ 0.06 | 15.73                        | 4.80 $\pm$ 0.09 |
| C-104    | 1.51                 | 5.82 $\pm$ 0.05 | 6.71                  | 5.17 $\pm$ 0.26 | > 20                                                       | < 4.70          | 2.44                         | 5.61 $\pm$ 0.10 | > 20                         | < 4.70          |
| C-105    | 1.95                 | 5.71 $\pm$ 0.07 | > 20                  | < 4.70          | > 20                                                       | < 4.70          | 6.07                         | 5.22 $\pm$ 0.19 | > 20                         | < 4.70          |
| C-106    | 1.72                 | 5.76 $\pm$ 0.10 | 19.31                 | 4.71 $\pm$ 0.04 | > 20                                                       | < 4.70          | 2.67                         | 5.57 $\pm$ 0.02 | > 20                         | < 4.70          |
| C-107    | 2.53                 | 5.60 $\pm$ 0.03 | > 20                  | < 4.70          | > 20                                                       | < 4.70          | 1.89                         | 5.72 $\pm$ 0.05 | > 20                         | < 4.70          |
| C-108    | 2.78                 | 5.56 $\pm$ 0.01 | 19.35                 | 4.71 $\pm$ 0.02 | > 20                                                       | < 4.70          | 1.79                         | 5.75 $\pm$ 0.05 | > 20                         | < 4.70          |
| C-109    | 1.55                 | 5.81 $\pm$ 0.07 | 15.37                 | 4.81 $\pm$ 0.10 | > 20                                                       | < 4.70          | 1.89                         | 5.72 $\pm$ 0.07 | > 20                         | < 4.70          |
| C-110    | 1.83                 | 5.74 $\pm$ 0.01 | 11.05                 | 4.96 $\pm$ 0.16 | > 20                                                       | < 4.70          | 2.03                         | 5.69 $\pm$ 0.06 | > 20                         | < 4.70          |
| C-111    | 0.68                 | 6.17 $\pm$ 0.08 | 7.19                  | 5.14 $\pm$ 0.18 | > 20                                                       | < 4.70          | 0.98                         | 6.01 $\pm$ 0.09 | > 20                         | < 4.70          |
| C-112    | 0.85                 | 6.07 $\pm$ 0.02 | 5.62                  | 5.25 $\pm$ 0.30 | > 20                                                       | < 4.70          | 2.04                         | 5.69 $\pm$ 0.07 | > 20                         | < 4.70          |
| C-113    | 1.14                 | 5.94 $\pm$ 0.05 | 5.25                  | 5.28 $\pm$ 0.28 | > 20                                                       | < 4.70          | 2.67                         | 5.57 $\pm$ 0.34 | 16.47                        | 4.78 $\pm$ 0.08 |
| C-114    | 2.19                 | 5.66 $\pm$ 0.04 | 15.85                 | 4.80 $\pm$ 0.09 | > 20                                                       | < 4.70          | 2.04                         | 5.69 $\pm$ 0.08 | > 20                         | < 4.70          |
| C-115    | 2.22                 | 5.65 $\pm$ 0.06 | 19.50                 | 4.71 $\pm$ 0.02 | > 20                                                       | < 4.70          | 2.36                         | 5.63 $\pm$ 0.17 | 16.60                        | 4.78 $\pm$ 0.08 |
| C-116    | 1.17                 | 5.93 $\pm$ 0.01 | > 20                  | < 4.70          | > 20                                                       | < 4.70          | 1.79                         | 5.75 $\pm$ 0.10 | 18.62                        | 4.73 $\pm$ 0.03 |
| C-117    | 2.93                 | 5.53 $\pm$ 0.03 | > 20                  | < 4.70          | > 20                                                       | < 4.70          | 2.79                         | 5.55 $\pm$ 0.14 | 15.67                        | 4.81 $\pm$ 0.11 |
| C-118    | 0.53                 | 6.27 $\pm$ 0.12 | 10.23                 | 4.99 $\pm$ 0.07 | > 20                                                       | < 4.70          | 1.37                         | 5.86 $\pm$ 0.10 | 19.20                        | 4.72 $\pm$ 0.02 |
| C-119    | 2.55                 | 5.59 $\pm$ 0.05 | 19.24                 | 4.72 $\pm$ 0.04 | > 20                                                       | < 4.70          | 4.45                         | 5.35 $\pm$ 0.15 | > 20                         | < 4.70          |
| C-120    | 1.07                 | 5.97 $\pm$ 0.13 | 12.69                 | 4.90 $\pm$ 0.08 | > 20                                                       | < 4.70          | 1.85                         | 5.73 $\pm$ 0.09 | > 20                         | < 4.70          |
| C-121    | 0.72                 | 6.14 $\pm$ 0.09 | 9.70                  | 5.01 $\pm$ 0.14 | > 20                                                       | < 4.70          | 1.69                         | 5.77 $\pm$ 0.09 | > 20                         | < 4.70          |
| C-122    | 1.39                 | 5.86 $\pm$ 0.06 | > 20                  | < 4.70          | > 20                                                       | < 4.70          | 1.77                         | 5.75 $\pm$ 0.09 | > 20                         | < 4.70          |
| C-123    | 0.49                 | 6.31 $\pm$ 0.05 | 4.79                  | 5.32 $\pm$ 0.25 | > 20                                                       | < 4.70          | 0.71                         | 6.15 $\pm$ 0.09 | > 20                         | < 4.70          |
| C-124    | 0.78                 | 6.11 $\pm$ 0.05 | 10.72                 | 4.97 $\pm$ 0.05 | > 20                                                       | < 4.70          | 3.89                         | 5.41 $\pm$ 0.15 | > 20                         | < 4.70          |
| C-125    | 1.98                 | 5.70 $\pm$ 0.16 | 12.53                 | 4.90 $\pm$ 0.28 | > 20                                                       | < 4.70          | 4.02                         | 5.40 $\pm$ 0.15 | > 20                         | < 4.70          |
| C-126    | 1.03                 | 5.99 $\pm$ 0.05 | > 20                  | < 4.70          | > 20                                                       | < 4.70          | 3.77                         | 5.42 $\pm$ 0.23 | > 20                         | < 4.70          |
| C-127    | 2.31                 | 5.64 $\pm$ 0.04 | 16.16                 | 4.79 $\pm$ 0.24 | > 20                                                       | < 4.70          | 3.98                         | 5.40 $\pm$ 0.25 | 16.60                        | 4.78 $\pm$ 0.08 |
| C-128    | 2.95                 | 5.53 $\pm$ 0.06 | > 20                  | < 4.70          | > 20                                                       | < 4.70          | 5.89                         | 5.23 $\pm$ 0.21 | 17.25                        | 4.76 $\pm$ 0.06 |
| C-129    | 1.91                 | 5.72 $\pm$ 0.03 | > 20                  | < 4.70          | > 20                                                       | < 4.70          | 3.34                         | 5.48 $\pm$ 0.14 | 13.18                        | 4.88 $\pm$ 0.18 |
| C-130    | 0.30                 | 6.52 $\pm$ 0.02 | 3.02                  | 5.52 $\pm$ 0.34 | > 20                                                       | < 4.70          | 0.84                         | 6.07 $\pm$ 0.32 | 1.25                         | 5.90 $\pm$ 0.12 |
| C-131    | 0.86                 | 6.07 $\pm$ 0.09 | 3.07                  | 5.51 $\pm$ 0.31 | > 20                                                       | < 4.70          | 0.89                         | 6.05 $\pm$ 0.31 | 6.17                         | 5.21 $\pm$ 0.14 |
| C-132    | 1.37                 | 5.86 $\pm$ 0.05 | 19.80                 | 4.70 $\pm$ 0.01 | > 20                                                       | < 4.70          | 2.47                         | 5.61 $\pm$ 0.03 | 19.65                        | 4.71 $\pm$ 0.01 |
| C-133    | 1.02                 | 5.99 $\pm$ 0.04 | 3.98                  | 5.40 $\pm$ 0.44 | > 20                                                       | < 4.70          | 2.12                         | 5.67 $\pm$ 0.23 | > 20                         | < 4.70          |
| C-134    | 1.58                 | 5.80 $\pm$ 0.08 | 7.59                  | 5.12 $\pm$ 0.19 | > 20                                                       | < 4.70          | 1.71                         | 5.77 $\pm$ 0.19 | 17.65                        | 4.75 $\pm$ 0.05 |
| C-135    | 0.40                 | 6.39 $\pm$ 0.42 | 3.29                  | 5.48 $\pm$ 0.37 | > 20                                                       | < 4.70          | 0.45                         | 6.34 $\pm$ 0.29 | 5.67                         | 5.25 $\pm$ 0.15 |
| C-136    | 0.81                 | 6.09 $\pm$ 0.02 | 15.73                 | 4.80 $\pm$ 0.07 | > 20                                                       | < 4.70          | 1.72                         | 5.76 $\pm$ 0.20 | 12.88                        | 4.89 $\pm$ 0.14 |
| C-137    | 1.06                 | 5.98 $\pm$ 0.03 | 9.68                  | 5.01 $\pm$ 0.30 | > 20                                                       | < 4.70          | 1.03                         | 5.99 $\pm$ 0.07 | 16.72                        | 4.78 $\pm$ 0.04 |
| C-138    | 0.22                 | 6.66 $\pm$ 0.24 | 5.75                  | 5.24 $\pm$ 0.17 | > 20                                                       | < 4.70          | 2.17                         | 5.66 $\pm$ 0.05 | > 20                         | < 4.70          |
| C-139    | 0.29                 | 6.54 $\pm$ 0.12 | 9.61                  | 5.02 $\pm$ 0.13 | > 20                                                       | < 4.70          | 2.40                         | 5.62 $\pm$ 0.07 | > 20                         | < 4.70          |
| C-140    | 1.32                 | 5.88 $\pm$ 0.14 | 19.14                 | 4.72 $\pm$ 0.04 | > 20                                                       | < 4.70          | 1.83                         | 5.74 $\pm$ 0.12 | > 20                         | < 4.70          |
| C-141    | 0.51                 | 6.30 $\pm$ 0.13 | 4.64                  | 5.33 $\pm$ 0.28 | > 20                                                       | < 4.70          | 2.04                         | 5.69 $\pm$ 0.08 | > 20                         | < 4.70          |

**Table S4. Activity of 5-NI compounds against anaerobic bacteria**

| Compound | <i>H. pylori</i> SS1 |             | <i>H. pylori</i> CS22 |             | <i>H. pylori</i> <i>ΔfrxA ΔrdxA</i> |        | <i>C. difficile</i> ATCC9689 |             | <i>B. fragilis</i> ATCC25285 |             |
|----------|----------------------|-------------|-----------------------|-------------|-------------------------------------|--------|------------------------------|-------------|------------------------------|-------------|
|          | EC50 (μM)            | pEC50       | EC50 (μM)             | pEC50       | EC50 (μM)                           | pEC50  | EC50 (μM)                    | pEC50       | EC50 (μM)                    | pEC50       |
| C-142    | 2.14                 | 5.67 ± 0.08 | 12.53                 | 4.90 ± 0.13 | > 20                                | < 4.70 | 2.59                         | 5.59 ± 0.16 | 18.62                        | 4.73 ± 0.03 |
| C-143    | 1.35                 | 5.87 ± 0.04 | 6.92                  | 5.16 ± 0.13 | > 20                                | < 4.70 | 1.98                         | 5.70 ± 0.20 | > 20                         | < 4.70      |
| C-144    | 1.57                 | 5.80 ± 0.00 | > 20                  | < 4.70      | > 20                                | < 4.70 | 3.16                         | 5.50 ± 0.33 | > 20                         | < 4.70      |
| C-145    | 2.69                 | 5.57 ± 0.05 | 18.87                 | 4.72 ± 0.03 | > 20                                | < 4.70 | 2.33                         | 5.63 ± 0.01 | 11.84                        | 4.93 ± 0.23 |
| C-146    | 4.43                 | 5.35 ± 0.06 | > 20                  | < 4.70      | > 20                                | < 4.70 | 10.88                        | 4.96 ± 0.01 | > 20                         | < 4.70      |
| C-147    | 2.80                 | 5.55 ± 0.03 | 7.19                  | 5.14 ± 0.34 | > 20                                | < 4.70 | 6.21                         | 5.21 ± 0.21 | > 20                         | < 4.70      |
| C-148    | 1.03                 | 5.99 ± 0.13 | 3.34                  | 5.48 ± 0.38 | > 20                                | < 4.70 | 3.07                         | 5.51 ± 0.17 | 18.62                        | 4.73 ± 0.03 |
| C-149    | 0.55                 | 6.26 ± 0.08 | 8.45                  | 5.07 ± 0.11 | > 20                                | < 4.70 | 4.20                         | 5.38 ± 0.21 | > 20                         | < 4.70      |
| C-150    | 4.33                 | 5.36 ± 0.08 | > 20                  | < 4.70      | > 20                                | < 4.70 | 6.61                         | 5.18 ± 0.21 | > 20                         | < 4.70      |
| C-151    | 1.58                 | 5.80 ± 0.10 | 10.55                 | 4.98 ± 0.28 | > 20                                | < 4.70 | 7.30                         | 5.14 ± 0.19 | 18.20                        | 4.74 ± 0.04 |
| C-152    | 8.78                 | 5.06 ± 0.04 | 19.23                 | 4.72 ± 0.04 | > 20                                | < 4.70 | 2.26                         | 5.65 ± 0.01 | > 20                         | < 4.70      |
| C-153    | 1.83                 | 5.74 ± 0.11 | 4.27                  | 5.37 ± 0.14 | > 20                                | < 4.70 | 3.31                         | 5.48 ± 0.13 | > 20                         | < 4.70      |
| C-154    | 5.41                 | 5.27 ± 0.06 | > 20                  | < 4.70      | > 20                                | < 4.70 | 5.75                         | 5.24 ± 0.20 | > 20                         | < 4.70      |
| C-155    | 1.30                 | 5.89 ± 0.07 | 3.55                  | 5.45 ± 0.28 | > 20                                | < 4.70 | 2.24                         | 5.65 ± 0.10 | > 20                         | < 4.70      |
| C-156    | 2.09                 | 5.68 ± 0.08 | 18.20                 | 4.74 ± 0.09 | > 20                                | < 4.70 | 3.92                         | 5.41 ± 0.21 | > 20                         | < 4.70      |
| C-157    | 1.89                 | 5.72 ± 0.29 | 8.38                  | 5.08 ± 0.11 | > 20                                | < 4.70 | 2.55                         | 5.59 ± 0.05 | > 20                         | < 4.70      |
| C-158    | 0.34                 | 6.47 ± 0.03 | 7.76                  | 5.11 ± 0.19 | > 20                                | < 4.70 | 2.38                         | 5.62 ± 0.02 | > 20                         | < 4.70      |
| C-159    | 0.80                 | 6.10 ± 0.11 | 15.02                 | 4.82 ± 0.11 | > 20                                | < 4.70 | 1.95                         | 5.71 ± 0.09 | > 20                         | < 4.70      |
| C-160    | 1.56                 | 5.81 ± 0.13 | 15.92                 | 4.80 ± 0.15 | > 20                                | < 4.70 | 3.63                         | 5.44 ± 0.13 | > 20                         | < 4.70      |
| C-161    | 0.28                 | 6.55 ± 0.19 | 12.30                 | 4.91 ± 0.18 | > 20                                | < 4.70 | 2.33                         | 5.63 ± 0.05 | > 20                         | < 4.70      |
| C-162    | 0.39                 | 6.41 ± 0.10 | 12.21                 | 4.91 ± 0.20 | > 20                                | < 4.70 | 2.29                         | 5.64 ± 0.03 | 17.11                        | 4.77 ± 0.07 |
| C-163    | 0.87                 | 6.06 ± 0.15 | 10.72                 | 4.97 ± 0.14 | > 20                                | < 4.70 | 1.39                         | 5.86 ± 0.13 | > 20                         | < 4.70      |
| D-101    | 9.26                 | 5.03 ± 0.02 | > 20                  | < 4.70      | > 20                                | < 4.70 | 9.55                         | 5.02 ± 0.02 | > 20                         | < 4.70      |
| D-102    | 14.91                | 4.83 ± 0.04 | > 20                  | < 4.70      | > 20                                | < 4.70 | 9.85                         | 5.01 ± 0.01 | > 20                         | < 4.70      |
| D-103    | 10.47                | 4.98 ± 0.02 | > 20                  | < 4.70      | > 20                                | < 4.70 | 9.48                         | 5.02 ± 0.03 | > 20                         | < 4.70      |
| D-104    | 11.57                | 4.94 ± 0.01 | > 20                  | < 4.70      | > 20                                | < 4.70 | 9.92                         | 5.00 ± 0.04 | > 20                         | < 4.70      |
| D-105    | 9.48                 | 5.02 ± 0.07 | > 20                  | < 4.70      | > 20                                | < 4.70 | 10.88                        | 4.96 ± 0.09 | > 20                         | < 4.70      |
| D-106    | 8.91                 | 5.05 ± 0.08 | > 20                  | < 4.70      | > 20                                | < 4.70 | 9.48                         | 5.02 ± 0.01 | > 20                         | < 4.70      |
| D-107    | 8.84                 | 5.05 ± 0.08 | > 20                  | < 4.70      | > 20                                | < 4.70 | 9.40                         | 5.03 ± 0.02 | > 20                         | < 4.70      |
| D-108    | 10.72                | 4.97 ± 0.05 | > 20                  | < 4.70      | > 20                                | < 4.70 | 9.48                         | 5.02 ± 0.02 | > 20                         | < 4.70      |
| D-109    | 13.59                | 4.87 ± 0.05 | > 20                  | < 4.70      | > 20                                | < 4.70 | 9.40                         | 5.03 ± 0.01 | > 20                         | < 4.70      |
| D-110    | 8.00                 | 5.10 ± 0.03 | > 20                  | < 4.70      | > 20                                | < 4.70 | 9.40                         | 5.03 ± 0.01 | > 20                         | < 4.70      |
| D-111    | 11.57                | 4.94 ± 0.02 | > 20                  | < 4.70      | > 20                                | < 4.70 | 9.85                         | 5.01 ± 0.02 | > 20                         | < 4.70      |
| D-112    | 4.82                 | 5.32 ± 0.04 | > 20                  | < 4.70      | > 20                                | < 4.70 | 5.80                         | 5.24 ± 0.19 | > 20                         | < 4.70      |
| D-113    | 14.34                | 4.84 ± 0.07 | > 20                  | < 4.70      | > 20                                | < 4.70 | 9.33                         | 5.03 ± 0.01 | > 20                         | < 4.70      |
| D-114    | 10.80                | 4.97 ± 0.04 | > 20                  | < 4.70      | > 20                                | < 4.70 | 9.19                         | 5.04 ± 0.02 | > 20                         | < 4.70      |
| D-115    | 8.98                 | 5.05 ± 0.03 | > 20                  | < 4.70      | > 20                                | < 4.70 | 9.55                         | 5.02 ± 0.01 | > 20                         | < 4.70      |
| D-116    | 10.15                | 4.99 ± 0.04 | > 20                  | < 4.70      | > 20                                | < 4.70 | 9.33                         | 5.03 ± 0.01 | > 20                         | < 4.70      |
| D-117    | 19.50                | 4.71 ± 0.01 | > 20                  | < 4.70      | > 20                                | < 4.70 | 9.19                         | 5.04 ± 0.03 | > 20                         | < 4.70      |
| D-118    | 1.29                 | 5.89 ± 0.10 | > 20                  | < 4.70      | > 20                                | < 4.70 | 7.47                         | 5.13 ± 0.08 | > 20                         | < 4.70      |
| D-119    | 8.13                 | 5.09 ± 0.08 | > 20                  | < 4.70      | > 20                                | < 4.70 | 9.55                         | 5.02 ± 0.01 | > 20                         | < 4.70      |
| D-120    | 10.39                | 4.98 ± 0.05 | > 20                  | < 4.70      | > 20                                | < 4.70 | 9.92                         | 5.00 ± 0.02 | > 20                         | < 4.70      |
| D-121    | 13.91                | 4.86 ± 0.02 | > 20                  | < 4.70      | > 20                                | < 4.70 | 9.92                         | 5.00 ± 0.02 | > 20                         | < 4.70      |
| D-122    | 11.93                | 4.92 ± 0.03 | > 20                  | < 4.70      | > 20                                | < 4.70 | 9.92                         | 5.00 ± 0.02 | > 20                         | < 4.70      |
| D-123    | 1.48                 | 5.83 ± 0.11 | > 20                  | < 4.70      | > 20                                | < 4.70 | 1.86                         | 5.73 ± 0.26 | > 20                         | < 4.70      |
| D-124    | 10.72                | 4.97 ± 0.02 | > 20                  | < 4.70      | > 20                                | < 4.70 | 10.23                        | 4.99 ± 0.02 | > 20                         | < 4.70      |
| D-125    | 8.13                 | 5.09 ± 0.04 | > 20                  | < 4.70      | > 20                                | < 4.70 | 10.63                        | 4.97 ± 0.03 | > 20                         | < 4.70      |
| D-126    | 5.21                 | 5.28 ± 0.03 | > 20                  | < 4.70      | > 20                                | < 4.70 | 10.08                        | 5.00 ± 0.03 | > 20                         | < 4.70      |
| D-127    | 1.58                 | 5.80 ± 0.20 | > 20                  | < 4.70      | > 20                                | < 4.70 | 10.08                        | 5.00 ± 0.03 | > 20                         | < 4.70      |
| D-128    | 1.81                 | 5.74 ± 0.14 | > 20                  | < 4.70      | > 20                                | < 4.70 | 10.63                        | 4.97 ± 0.03 | > 20                         | < 4.70      |
| D-129    | 4.17                 | 5.38 ± 0.06 | > 20                  | < 4.70      | > 20                                | < 4.70 | 10.00                        | 5.00 ± 0.02 | 16.47                        | 4.78 ± 0.08 |
| D-130    | 2.61                 | 5.58 ± 0.09 | > 20                  | < 4.70      | > 20                                | < 4.70 | 10.00                        | 5.00 ± 0.03 | > 20                         | < 4.70      |
| D-131    | 9.12                 | 5.04 ± 0.05 | > 20                  | < 4.70      | > 20                                | < 4.70 | 8.58                         | 5.07 ± 0.03 | > 20                         | < 4.70      |
| D-132    | 9.92                 | 5.00 ± 0.03 | > 20                  | < 4.70      | > 20                                | < 4.70 | 9.40                         | 5.03 ± 0.05 | > 20                         | < 4.70      |
| D-133    | 5.45                 | 5.26 ± 0.10 | > 20                  | < 4.70      | > 20                                | < 4.70 | 9.77                         | 5.01 ± 0.05 | > 20                         | < 4.70      |
| D-134    | 7.53                 | 5.12 ± 0.12 | > 20                  | < 4.70      | > 20                                | < 4.70 | 9.77                         | 5.01 ± 0.05 | > 20                         | < 4.70      |

**Table S4. Activity of 5-NI compounds against anaerobic bacteria**

| Compound | <i>H. pylori</i> SS1 |             | <i>H. pylori</i> CS22 |             | <i>H. pylori</i> Δ <i>frxA</i> Δ <i>rdxA</i> |        | <i>C. difficile</i> ATCC9689 |             | <i>B. fragilis</i> ATCC25285 |             |
|----------|----------------------|-------------|-----------------------|-------------|----------------------------------------------|--------|------------------------------|-------------|------------------------------|-------------|
|          | EC50 (μM)            | pEC50       | EC50 (μM)             | pEC50       | EC50 (μM)                                    | pEC50  | EC50 (μM)                    | pEC50       | EC50 (μM)                    | pEC50       |
| D-135    | 7.88                 | 5.10 ± 0.06 | > 20                  | < 4.70      | > 20                                         | < 4.70 | 2.09                         | 5.68 ± 0.05 | > 20                         | < 4.70      |
| D-136    | 8.19                 | 5.09 ± 0.05 | > 20                  | < 4.70      | > 20                                         | < 4.70 | 9.26                         | 5.03 ± 0.02 | > 20                         | < 4.70      |
| D-137    | 4.86                 | 5.31 ± 0.16 | > 20                  | < 4.70      | > 20                                         | < 4.70 | 2.29                         | 5.64 ± 0.01 | > 20                         | < 4.70      |
| D-138    | 7.19                 | 5.14 ± 0.14 | > 20                  | < 4.70      | > 20                                         | < 4.70 | 10.00                        | 5.00 ± 0.03 | > 20                         | < 4.70      |
| D-139    | 6.36                 | 5.20 ± 0.13 | > 20                  | < 4.70      | > 20                                         | < 4.70 | 9.92                         | 5.00 ± 0.02 | > 20                         | < 4.70      |
| D-140    | 10.00                | 5.00 ± 0.10 | > 20                  | < 4.70      | > 20                                         | < 4.70 | 9.77                         | 5.01 ± 0.03 | > 20                         | < 4.70      |
| D-141    | 9.05                 | 5.04 ± 0.09 | > 20                  | < 4.70      | > 20                                         | < 4.70 | 8.91                         | 5.05 ± 0.04 | > 20                         | < 4.70      |
| D-142    | 12.02                | 4.92 ± 0.01 | > 20                  | < 4.70      | > 20                                         | < 4.70 | 10.00                        | 5.00 ± 0.03 | > 20                         | < 4.70      |
| D-143    | 11.13                | 4.95 ± 0.03 | > 20                  | < 4.70      | > 20                                         | < 4.70 | 10.31                        | 4.99 ± 0.03 | > 20                         | < 4.70      |
| D-144    | 11.93                | 4.92 ± 0.02 | 19.69                 | 4.71 ± 0.02 | > 20                                         | < 4.70 | 10.55                        | 4.98 ± 0.02 | > 20                         | < 4.70      |
| D-145    | 6.71                 | 5.17 ± 0.05 | 18.06                 | 4.74 ± 0.07 | > 20                                         | < 4.70 | 9.55                         | 5.02 ± 0.03 | > 20                         | < 4.70      |
| D-146    | 12.02                | 4.92 ± 0.02 | > 20                  | < 4.70      | > 20                                         | < 4.70 | 9.85                         | 5.01 ± 0.03 | > 20                         | < 4.70      |
| D-147    | 12.88                | 4.89 ± 0.04 | > 20                  | < 4.70      | > 20                                         | < 4.70 | 8.32                         | 5.08 ± 0.04 | > 20                         | < 4.70      |
| D-148    | 3.60                 | 5.44 ± 0.12 | > 20                  | < 4.70      | > 20                                         | < 4.70 | 3.49                         | 5.46 ± 0.20 | > 20                         | < 4.70      |
| D-149    | 10.23                | 4.99 ± 0.04 | 16.82                 | 4.77 ± 0.11 | > 20                                         | < 4.70 | 10.15                        | 4.99 ± 0.03 | > 20                         | < 4.70      |
| D-150    | 6.41                 | 5.19 ± 0.13 | > 20                  | < 4.70      | > 20                                         | < 4.70 | 6.03                         | 5.22 ± 0.20 | > 20                         | < 4.70      |
| D-151    | 3.83                 | 5.42 ± 0.07 | > 20                  | < 4.70      | > 20                                         | < 4.70 | 10.00                        | 5.00 ± 0.03 | > 20                         | < 4.70      |
| D-152    | 7.82                 | 5.11 ± 0.10 | > 20                  | < 4.70      | > 20                                         | < 4.70 | 9.70                         | 5.01 ± 0.03 | > 20                         | < 4.70      |
| D-153    | 10.08                | 5.00 ± 0.03 | > 20                  | < 4.70      | > 20                                         | < 4.70 | 9.55                         | 5.02 ± 0.03 | > 20                         | < 4.70      |
| D-154    | 10.47                | 4.98 ± 0.04 | 19.61                 | 4.71 ± 0.02 | > 20                                         | < 4.70 | 9.40                         | 5.03 ± 0.03 | > 20                         | < 4.70      |
| D-155    | 5.80                 | 5.24 ± 0.08 | > 20                  | < 4.70      | > 20                                         | < 4.70 | 9.40                         | 5.03 ± 0.02 | > 20                         | < 4.70      |
| D-156    | 6.26                 | 5.20 ± 0.24 | > 20                  | < 4.70      | > 20                                         | < 4.70 | 9.40                         | 5.03 ± 0.03 | > 20                         | < 4.70      |
| D-157    | 2.33                 | 5.63 ± 0.05 | > 20                  | < 4.70      | > 20                                         | < 4.70 | 7.88                         | 5.10 ± 0.06 | > 20                         | < 4.70      |
| D-158    | 11.57                | 4.94 ± 0.02 | > 20                  | < 4.70      | > 20                                         | < 4.70 | 8.64                         | 5.06 ± 0.03 | > 20                         | < 4.70      |
| D-159    | 9.12                 | 5.04 ± 0.07 | > 20                  | < 4.70      | > 20                                         | < 4.70 | 5.33                         | 5.27 ± 0.21 | > 20                         | < 4.70      |
| D-160    | 11.13                | 4.95 ± 0.04 | > 20                  | < 4.70      | > 20                                         | < 4.70 | 12.12                        | 4.92 ± 0.11 | > 20                         | < 4.70      |
| D-161    | 7.13                 | 5.15 ± 0.13 | > 20                  | < 4.70      | > 20                                         | < 4.70 | 11.31                        | 4.95 ± 0.12 | > 20                         | < 4.70      |
| D-162    | 8.84                 | 5.05 ± 0.04 | > 20                  | < 4.70      | > 20                                         | < 4.70 | 8.45                         | 5.07 ± 0.02 | > 20                         | < 4.70      |
| D-163    | 2.20                 | 5.66 ± 0.20 | > 20                  | < 4.70      | > 20                                         | < 4.70 | 5.37                         | 5.27 ± 0.22 | > 20                         | < 4.70      |
| E-101    | 0.91                 | 6.04 ± 0.12 | 7.70                  | 5.11 ± 0.19 | > 20                                         | < 4.70 | 1.20                         | 5.92 ± 0.09 | 4.94                         | 5.31 ± 0.15 |
| E-102    | 0.98                 | 6.01 ± 0.08 | 1.92                  | 5.72 ± 0.20 | > 20                                         | < 4.70 | 1.58                         | 5.80 ± 0.16 | 3.14                         | 5.50 ± 0.20 |
| E-103    | 1.54                 | 5.81 ± 0.15 | 1.10                  | 5.96 ± 0.21 | > 20                                         | < 4.70 | 2.27                         | 5.64 ± 0.08 | 8.91                         | 5.05 ± 0.08 |
| E-104    | 1.41                 | 5.85 ± 0.06 | 2.53                  | 5.60 ± 0.21 | > 20                                         | < 4.70 | 1.65                         | 5.78 ± 0.18 | 5.75                         | 5.24 ± 0.11 |
| E-105    | 0.76                 | 6.12 ± 0.04 | 0.89                  | 6.05 ± 0.27 | > 20                                         | < 4.70 | 0.93                         | 6.03 ± 0.08 | 12.98                        | 4.89 ± 0.07 |
| E-106    | 1.40                 | 5.85 ± 0.09 | 2.47                  | 5.61 ± 0.18 | > 20                                         | < 4.70 | 1.83                         | 5.74 ± 0.22 | 15.14                        | 4.82 ± 0.07 |
| E-107    | 1.32                 | 5.88 ± 0.02 | 0.67                  | 6.17 ± 0.18 | > 20                                         | < 4.70 | 0.91                         | 6.04 ± 0.08 | 4.20                         | 5.38 ± 0.10 |
| E-108    | 3.09                 | 5.51 ± 0.04 | 1.63                  | 5.79 ± 0.27 | > 20                                         | < 4.70 | 1.54                         | 5.81 ± 0.13 | 12.49                        | 4.90 ± 0.10 |
| E-109    | 2.14                 | 5.67 ± 0.05 | 2.47                  | 5.61 ± 0.24 | > 20                                         | < 4.70 | 1.41                         | 5.85 ± 0.19 | 13.39                        | 4.87 ± 0.09 |
| E-110    | 1.05                 | 5.98 ± 0.08 | 0.62                  | 6.21 ± 0.21 | > 20                                         | < 4.70 | 1.10                         | 5.96 ± 0.09 | 12.02                        | 4.92 ± 0.12 |
| E-111    | 2.47                 | 5.61 ± 0.09 | 7.87                  | 5.10 ± 0.30 | > 20                                         | < 4.70 | 0.62                         | 6.21 ± 0.06 | 8.32                         | 5.08 ± 0.19 |
| E-112    | 9.33                 | 5.03 ± 0.33 | 0.48                  | 6.32 ± 0.21 | > 20                                         | < 4.70 | 0.76                         | 6.12 ± 0.09 | 7.19                         | 5.14 ± 0.28 |
| E-113    | 9.40                 | 5.03 ± 0.05 | 1.53                  | 5.82 ± 0.31 | > 20                                         | < 4.70 | 0.42                         | 6.38 ± 0.14 | 1.42                         | 5.85 ± 0.03 |
| E-114    | 12.40                | 4.91 ± 0.03 | 13.12                 | 4.88 ± 0.37 | > 20                                         | < 4.70 | 0.65                         | 6.19 ± 0.09 | 4.33                         | 5.36 ± 0.11 |
| E-115    | 6.71                 | 5.17 ± 0.03 | 15.97                 | 4.80 ± 0.17 | > 20                                         | < 4.70 | 0.56                         | 6.25 ± 0.14 | 6.36                         | 5.20 ± 0.25 |
| E-116    | 3.92                 | 5.41 ± 0.08 | 6.52                  | 5.19 ± 0.31 | > 20                                         | < 4.70 | 0.75                         | 6.13 ± 0.01 | 4.86                         | 5.31 ± 0.10 |
| E-117    | > 20                 | < 4.70      | 2.15                  | 5.67 ± 0.24 | > 20                                         | < 4.70 | 3.98                         | 5.40 ± 0.20 | > 20                         | < 4.70      |
| E-118    | 0.80                 | 6.10 ± 0.04 | 0.65                  | 6.19 ± 0.35 | > 20                                         | < 4.70 | 2.47                         | 5.61 ± 0.25 | 12.59                        | 4.90 ± 0.15 |
| E-119    | 1.61                 | 5.79 ± 0.14 | 0.86                  | 6.06 ± 0.07 | > 20                                         | < 4.70 | 2.33                         | 5.63 ± 0.21 | 18.91                        | 4.72 ± 0.02 |
| E-120    | 2.40                 | 5.62 ± 0.07 | 0.74                  | 6.13 ± 0.12 | > 20                                         | < 4.70 | 0.52                         | 6.28 ± 0.19 | 2.57                         | 5.59 ± 0.13 |
| E-121    | 3.74                 | 5.43 ± 0.03 | 15.14                 | 4.82 ± 0.12 | > 20                                         | < 4.70 | 0.45                         | 6.34 ± 0.15 | 4.97                         | 5.30 ± 0.13 |
| E-122    | 2.91                 | 5.54 ± 0.03 | 2.82                  | 5.55 ± 0.11 | > 20                                         | < 4.70 | 1.33                         | 5.88 ± 0.18 | 4.54                         | 5.34 ± 0.14 |
| E-123    | > 20                 | < 4.70      | 1.61                  | 5.79 ± 0.23 | > 20                                         | < 4.70 | 0.76                         | 6.12 ± 0.02 | 6.17                         | 5.21 ± 0.26 |
| E-124    | > 20                 | < 4.70      | 3.77                  | 5.42 ± 0.05 | > 20                                         | < 4.70 | 1.95                         | 5.71 ± 0.10 | 14.79                        | 4.83 ± 0.08 |
| E-125    | 17.11                | 4.77 ± 0.07 | 0.74                  | 6.13 ± 0.02 | > 20                                         | < 4.70 | 1.96                         | 5.71 ± 0.06 | 5.62                         | 5.25 ± 0.16 |
| E-126    | 4.82                 | 5.32 ± 0.09 | 0.86                  | 6.06 ± 0.11 | > 20                                         | < 4.70 | 1.46                         | 5.84 ± 0.20 | 5.98                         | 5.22 ± 0.18 |
| E-127    | 2.93                 | 5.53 ± 0.02 | 4.17                  | 5.38 ± 0.13 | > 20                                         | < 4.70 | 2.44                         | 5.61 ± 0.01 | 19.65                        | 4.71 ± 0.01 |

**Table S4. Activity of 5-NI compounds against anaerobic bacteria**

| Compound | <i>H. pylori</i> SS1 |                 | <i>H. pylori</i> CS22 |                 | <i>H. pylori</i> $\Delta$ <i>ftrA</i> $\Delta$ <i>rdxA</i> |                 | <i>C. difficile</i> ATCC9689 |                 | <i>B. fragilis</i> ATCC25285 |                 |
|----------|----------------------|-----------------|-----------------------|-----------------|------------------------------------------------------------|-----------------|------------------------------|-----------------|------------------------------|-----------------|
|          | EC50 ( $\mu$ M)      | pEC50           | EC50 ( $\mu$ M)       | pEC50           | EC50 ( $\mu$ M)                                            | pEC50           | EC50 ( $\mu$ M)              | pEC50           | EC50 ( $\mu$ M)              | pEC50           |
| E-128    | 0.11                 | 6.94 $\pm$ 0.04 | 1.40                  | 5.85 $\pm$ 0.17 | > 20                                                       | < 4.70          | 1.04                         | 5.98 $\pm$ 0.12 | 11.75                        | 4.93 $\pm$ 0.12 |
| E-129    | 3.58                 | 5.45 $\pm$ 0.02 | > 20                  | < 4.70          | > 20                                                       | < 4.70          | 3.63                         | 5.44 $\pm$ 0.26 | > 20                         | < 4.70          |
| E-130    | 1.25                 | 5.90 $\pm$ 0.07 | 2.22                  | 5.65 $\pm$ 0.32 | > 20                                                       | < 4.70          | 0.75                         | 6.13 $\pm$ 0.31 | 11.22                        | 4.95 $\pm$ 0.10 |
| E-131    | 0.76                 | 6.12 $\pm$ 0.11 | 0.91                  | 6.04 $\pm$ 0.17 | > 20                                                       | < 4.70          | 5.37                         | 5.27 $\pm$ 0.19 | 12.88                        | 4.89 $\pm$ 0.07 |
| E-132    | 9.62                 | 5.02 $\pm$ 0.03 | 5.84                  | 5.23 $\pm$ 0.22 | > 20                                                       | < 4.70          | 2.31                         | 5.64 $\pm$ 0.03 | 8.13                         | 5.09 $\pm$ 0.12 |
| E-133    | 3.74                 | 5.43 $\pm$ 0.20 | 0.60                  | 6.22 $\pm$ 0.03 | > 20                                                       | < 4.70          | 2.40                         | 5.62 $\pm$ 0.16 | 8.71                         | 5.06 $\pm$ 0.23 |
| E-134    | 1.96                 | 5.71 $\pm$ 0.11 | 0.60                  | 6.22 $\pm$ 0.34 | > 20                                                       | < 4.70          | 0.98                         | 6.01 $\pm$ 0.21 | 9.85                         | 5.01 $\pm$ 0.06 |
| E-135    | 0.41                 | 6.38 $\pm$ 0.08 | 0.52                  | 6.28 $\pm$ 0.46 | > 20                                                       | < 4.70          | 0.81                         | 6.09 $\pm$ 0.20 | 0.66                         | 6.18 $\pm$ 0.37 |
| E-136    | 4.86                 | 5.31 $\pm$ 0.07 | 2.82                  | 5.55 $\pm$ 0.19 | > 20                                                       | < 4.70          | 1.48                         | 5.83 $\pm$ 0.12 | 7.94                         | 5.10 $\pm$ 0.10 |
| E-137    | 1.71                 | 5.77 $\pm$ 0.11 | 1.45                  | 5.84 $\pm$ 0.24 | > 20                                                       | < 4.70          | 0.81                         | 6.09 $\pm$ 0.17 | 11.48                        | 4.94 $\pm$ 0.24 |
| E-138    | 0.46                 | 6.34 $\pm$ 0.05 | 0.24                  | 6.61 $\pm$ 0.13 | > 20                                                       | < 4.70          | 1.32                         | 5.88 $\pm$ 0.25 | 9.33                         | 5.03 $\pm$ 0.20 |
| E-139    | 0.69                 | 6.16 $\pm$ 0.14 | 0.59                  | 6.23 $\pm$ 0.16 | > 20                                                       | < 4.70          | 1.53                         | 5.82 $\pm$ 0.18 | 9.66                         | 5.02 $\pm$ 0.31 |
| E-140    | 2.51                 | 5.60 $\pm$ 0.10 | 1.51                  | 5.82 $\pm$ 0.29 | > 20                                                       | < 4.70          | 1.19                         | 5.92 $\pm$ 0.11 | > 20                         | < 4.70          |
| E-141    | 0.11                 | 6.95 $\pm$ 0.07 | 0.70                  | 6.15 $\pm$ 0.24 | 10.72                                                      | 4.97 $\pm$ 0.05 | 0.82                         | 6.09 $\pm$ 0.31 | 17.78                        | 4.75 $\pm$ 0.05 |
| E-142    | 2.33                 | 5.63 $\pm$ 0.08 | 1.81                  | 5.74 $\pm$ 0.22 | > 20                                                       | < 4.70          | 1.51                         | 5.82 $\pm$ 0.11 | 2.51                         | 5.60 $\pm$ 0.17 |
| E-143    | 0.66                 | 6.18 $\pm$ 0.19 | 2.33                  | 5.63 $\pm$ 0.47 | > 20                                                       | < 4.70          | 0.53                         | 6.27 $\pm$ 0.06 | 2.01                         | 5.70 $\pm$ 0.12 |
| E-144    | 9.85                 | 5.01 $\pm$ 0.08 | 11.86                 | 4.93 $\pm$ 0.40 | > 20                                                       | < 4.70          | 11.31                        | 4.95 $\pm$ 0.03 | > 20                         | < 4.70          |
| E-145    | 9.19                 | 5.04 $\pm$ 0.07 | 6.12                  | 5.21 $\pm$ 0.45 | > 20                                                       | < 4.70          | 5.29                         | 5.28 $\pm$ 0.16 | 14.57                        | 4.84 $\pm$ 0.14 |
| E-146    | 4.68                 | 5.33 $\pm$ 0.11 | 0.66                  | 6.18 $\pm$ 0.19 | > 20                                                       | < 4.70          | 5.54                         | 5.26 $\pm$ 0.30 | > 20                         | < 4.70          |
| E-147    | 1.81                 | 5.74 $\pm$ 0.07 | 0.30                  | 6.52 $\pm$ 0.30 | > 20                                                       | < 4.70          | 10.80                        | 4.97 $\pm$ 0.00 | 19.35                        | 4.71 $\pm$ 0.01 |
| E-148    | > 20                 | < 4.70          | 0.62                  | 6.21 $\pm$ 0.33 | > 20                                                       | < 4.70          | 5.33                         | 5.27 $\pm$ 0.28 | 15.97                        | 4.80 $\pm$ 0.10 |
| E-149    | > 20                 | < 4.70          | 0.57                  | 6.25 $\pm$ 0.32 | > 20                                                       | < 4.70          | 2.24                         | 5.65 $\pm$ 0.12 | > 20                         | < 4.70          |
| E-150    | 0.38                 | 6.42 $\pm$ 0.25 | 0.59                  | 6.23 $\pm$ 0.22 | > 20                                                       | < 4.70          | 2.73                         | 5.56 $\pm$ 0.19 | > 20                         | < 4.70          |
| E-151    | 1.91                 | 5.72 $\pm$ 0.14 | 2.73                  | 5.56 $\pm$ 0.25 | > 20                                                       | < 4.70          | 3.19                         | 5.50 $\pm$ 0.25 | > 20                         | < 4.70          |
| E-152    | > 20                 | < 4.70          | 16.34                 | 4.79 $\pm$ 0.13 | > 20                                                       | < 4.70          | 12.88                        | 4.89 $\pm$ 0.10 | > 20                         | < 4.70          |
| E-153    | 2.20                 | 5.66 $\pm$ 0.18 | 2.61                  | 5.58 $\pm$ 0.37 | > 20                                                       | < 4.70          | 2.15                         | 5.67 $\pm$ 0.10 | > 20                         | < 4.70          |
| E-154    | 5.58                 | 5.25 $\pm$ 0.07 | 1.35                  | 5.87 $\pm$ 0.47 | > 20                                                       | < 4.70          | 6.26                         | 5.20 $\pm$ 0.21 | > 20                         | < 4.70          |
| E-155    | 2.07                 | 5.68 $\pm$ 0.08 | 0.37                  | 6.44 $\pm$ 0.17 | > 20                                                       | < 4.70          | 1.47                         | 5.83 $\pm$ 0.28 | 17.65                        | 4.75 $\pm$ 0.05 |
| E-156    | 0.40                 | 6.40 $\pm$ 0.21 | 0.35                  | 6.46 $\pm$ 0.07 | > 20                                                       | < 4.70          | 2.12                         | 5.67 $\pm$ 0.07 | 10.88                        | 4.96 $\pm$ 0.13 |
| E-157    | 0.20                 | 6.70 $\pm$ 0.10 | 1.30                  | 5.89 $\pm$ 0.19 | > 20                                                       | < 4.70          | 1.53                         | 5.82 $\pm$ 0.17 | > 20                         | < 4.70          |
| E-158    | 0.33                 | 6.49 $\pm$ 0.01 | 0.83                  | 6.08 $\pm$ 0.33 | > 20                                                       | < 4.70          | 1.31                         | 5.88 $\pm$ 0.03 | 1.92                         | 5.72 $\pm$ 0.08 |
| E-159    | 1.76                 | 5.75 $\pm$ 0.03 | 1.82                  | 5.74 $\pm$ 0.06 | > 20                                                       | < 4.70          | 1.23                         | 5.91 $\pm$ 0.11 | 2.78                         | 5.56 $\pm$ 0.03 |
| E-160    | 2.34                 | 5.63 $\pm$ 0.19 | 2.01                  | 5.70 $\pm$ 0.22 | > 20                                                       | < 4.70          | 3.55                         | 5.45 $\pm$ 0.07 | > 20                         | < 4.70          |
| E-161    | 1.10                 | 5.96 $\pm$ 0.03 | 0.96                  | 6.02 $\pm$ 0.25 | > 20                                                       | < 4.70          | 3.92                         | 5.41 $\pm$ 0.22 | 2.78                         | 5.56 $\pm$ 0.03 |
| E-162    | > 20                 | < 4.70          | 2.00                  | 5.70 $\pm$ 0.25 | > 20                                                       | < 4.70          | 1.12                         | 5.95 $\pm$ 0.11 | 4.33                         | 5.36 $\pm$ 0.01 |
| E-163    | 0.52                 | 6.28 $\pm$ 0.11 | 0.95                  | 6.02 $\pm$ 0.09 | > 20                                                       | < 4.70          | 1.67                         | 5.78 $\pm$ 0.16 | 14.23                        | 4.85 $\pm$ 0.09 |
| F-101    | 3.52                 | 5.45 $\pm$ 0.06 | 4.82                  | 5.32 $\pm$ 0.27 | > 20                                                       | < 4.70          | 2.21                         | 5.66 $\pm$ 0.21 | 18.48                        | 4.73 $\pm$ 0.02 |
| F-102    | 2.49                 | 5.60 $\pm$ 0.05 | 2.19                  | 5.66 $\pm$ 0.18 | > 20                                                       | < 4.70          | 3.24                         | 5.49 $\pm$ 0.14 | 16.34                        | 4.79 $\pm$ 0.05 |
| F-103    | 3.11                 | 5.51 $\pm$ 0.13 | 4.32                  | 5.37 $\pm$ 0.30 | > 20                                                       | < 4.70          | 1.85                         | 5.73 $\pm$ 0.11 | 10.39                        | 4.98 $\pm$ 0.06 |
| F-104    | 7.59                 | 5.12 $\pm$ 0.05 | 5.37                  | 5.27 $\pm$ 0.16 | > 20                                                       | < 4.70          | 8.37                         | 5.08 $\pm$ 0.10 | > 20                         | < 4.70          |
| F-105    | 2.53                 | 5.60 $\pm$ 0.01 | 1.83                  | 5.74 $\pm$ 0.20 | > 20                                                       | < 4.70          | 5.72                         | 5.24 $\pm$ 0.25 | 19.65                        | 4.71 $\pm$ 0.01 |
| F-106    | 4.79                 | 5.32 $\pm$ 0.15 | 6.27                  | 5.20 $\pm$ 0.16 | > 20                                                       | < 4.70          | 10.41                        | 4.98 $\pm$ 0.21 | > 20                         | < 4.70          |
| F-107    | 2.34                 | 5.63 $\pm$ 0.08 | 2.05                  | 5.69 $\pm$ 0.10 | > 20                                                       | < 4.70          | 3.41                         | 5.47 $\pm$ 0.21 | 16.47                        | 4.78 $\pm$ 0.06 |
| F-108    | 2.12                 | 5.67 $\pm$ 0.18 | 2.11                  | 5.68 $\pm$ 0.10 | > 20                                                       | < 4.70          | 7.46                         | 5.13 $\pm$ 0.15 | 19.35                        | 4.71 $\pm$ 0.01 |
| F-109    | 0.87                 | 6.06 $\pm$ 0.18 | 1.81                  | 5.74 $\pm$ 0.05 | > 20                                                       | < 4.70          | 4.90                         | 5.31 $\pm$ 0.12 | 15.37                        | 4.81 $\pm$ 0.06 |
| F-110    | 1.32                 | 5.88 $\pm$ 0.17 | 1.04                  | 5.98 $\pm$ 0.09 | > 20                                                       | < 4.70          | 2.71                         | 5.57 $\pm$ 0.21 | 15.73                        | 4.80 $\pm$ 0.07 |
| F-111    | 7.88                 | 5.10 $\pm$ 0.11 | > 20                  | < 4.70          | > 20                                                       | < 4.70          | 3.63                         | 5.44 $\pm$ 0.14 | 17.78                        | 4.75 $\pm$ 0.03 |
| F-112    | 0.72                 | 6.14 $\pm$ 0.20 | 0.62                  | 6.21 $\pm$ 0.02 | > 20                                                       | < 4.70          | 3.43                         | 5.47 $\pm$ 0.15 | 11.75                        | 4.93 $\pm$ 0.12 |
| F-113    | 1.89                 | 5.72 $\pm$ 0.17 | 1.62                  | 5.79 $\pm$ 0.03 | > 20                                                       | < 4.70          | 1.22                         | 5.91 $\pm$ 0.18 | 5.13                         | 5.29 $\pm$ 0.11 |
| F-114    | 7.64                 | 5.12 $\pm$ 0.13 | 15.37                 | 4.81 $\pm$ 0.11 | > 20                                                       | < 4.70          | 3.98                         | 5.40 $\pm$ 0.25 | > 20                         | < 4.70          |
| F-115    | 4.04                 | 5.39 $\pm$ 0.16 | 6.31                  | 5.20 $\pm$ 0.11 | > 20                                                       | < 4.70          | 2.65                         | 5.58 $\pm$ 0.20 | 18.62                        | 4.73 $\pm$ 0.02 |
| F-116    | 5.89                 | 5.23 $\pm$ 0.08 | 7.76                  | 5.11 $\pm$ 0.12 | > 20                                                       | < 4.70          | 1.97                         | 5.71 $\pm$ 0.24 | > 20                         | < 4.70          |
| F-117    | 8.25                 | 5.08 $\pm$ 0.08 | 14.29                 | 4.85 $\pm$ 0.25 | > 20                                                       | < 4.70          | 1.28                         | 5.89 $\pm$ 0.08 | 13.39                        | 4.87 $\pm$ 0.15 |
| F-118    | > 20                 | < 4.70          | 2.56                  | 5.59 $\pm$ 0.33 | > 20                                                       | < 4.70          | 1.81                         | 5.74 $\pm$ 0.18 | 3.77                         | 5.42 $\pm$ 0.28 |
| F-119    | 3.80                 | 5.42 $\pm$ 0.02 | 17.99                 | 4.75 $\pm$ 0.05 | > 20                                                       | < 4.70          | 4.07                         | 5.39 $\pm$ 0.21 | 15.61                        | 4.81 $\pm$ 0.05 |
| F-120    | 8.38                 | 5.08 $\pm$ 0.07 | 5.75                  | 5.24 $\pm$ 0.12 | > 20                                                       | < 4.70          | 6.20                         | 5.21 $\pm$ 0.13 | > 20                         | < 4.70          |

**Table S4. Activity of 5-NI compounds against anaerobic bacteria**

| Compound | <i>H. pylori</i> SS1 |             | <i>H. pylori</i> CS22 |             | <i>H. pylori</i> <i>ΔfrxA ΔrdxA</i> |             | <i>C. difficile</i> ATCC9689 |             | <i>B. fragilis</i> ATCC25285 |             |
|----------|----------------------|-------------|-----------------------|-------------|-------------------------------------|-------------|------------------------------|-------------|------------------------------|-------------|
|          | EC50 (μM)            | pEC50       | EC50 (μM)             | pEC50       | EC50 (μM)                           | pEC50       | EC50 (μM)                    | pEC50       | EC50 (μM)                    | pEC50       |
| F-121    | 7.47                 | 5.13 ± 0.08 | 3.77                  | 5.42 ± 0.16 | > 20                                | < 4.70      | 5.37                         | 5.27 ± 0.16 | 19.50                        | 4.71 ± 0.01 |
| F-122    | 10.00                | 5.00 ± 0.03 | 7.54                  | 5.12 ± 0.26 | > 20                                | < 4.70      | 9.07                         | 5.04 ± 0.18 | > 20                         | < 4.70      |
| F-123    | 1.55                 | 5.81 ± 0.15 | 5.67                  | 5.25 ± 0.09 | > 20                                | < 4.70      | 0.94                         | 6.03 ± 0.19 | 16.60                        | 4.78 ± 0.08 |
| F-124    | 8.58                 | 5.07 ± 0.11 | 4.43                  | 5.35 ± 0.38 | > 20                                | < 4.70      | 9.17                         | 5.04 ± 0.17 | > 20                         | < 4.70      |
| F-125    | 8.00                 | 5.10 ± 0.07 | 10.08                 | 5.00 ± 0.36 | > 20                                | < 4.70      | 12.52                        | 4.90 ± 0.07 | > 20                         | < 4.70      |
| F-126    | 4.47                 | 5.35 ± 0.09 | 2.97                  | 5.53 ± 0.16 | > 20                                | < 4.70      | 5.62                         | 5.25 ± 0.26 | 19.35                        | 4.71 ± 0.01 |
| F-127    | 8.45                 | 5.07 ± 0.07 | 8.41                  | 5.08 ± 0.34 | > 20                                | < 4.70      | 1.41                         | 5.85 ± 0.13 | 15.02                        | 4.82 ± 0.07 |
| F-128    | 12.21                | 4.91 ± 0.05 | 14.18                 | 4.85 ± 0.36 | > 20                                | < 4.70      | 6.87                         | 5.16 ± 0.21 | > 20                         | < 4.70      |
| F-129    | 2.61                 | 5.58 ± 0.08 | 6.96                  | 5.16 ± 0.42 | > 20                                | < 4.70      | 2.11                         | 5.68 ± 0.08 | 13.80                        | 4.86 ± 0.08 |
| F-130    | 7.13                 | 5.15 ± 0.05 | 13.72                 | 4.86 ± 0.32 | > 20                                | < 4.70      | 3.29                         | 5.48 ± 0.24 | 9.48                         | 5.02 ± 0.18 |
| F-131    | > 20                 | < 4.70      | 2.93                  | 5.53 ± 0.36 | > 20                                | < 4.70      | 0.83                         | 6.08 ± 0.17 | 3.83                         | 5.42 ± 0.33 |
| F-132    | 9.85                 | 5.01 ± 0.02 | 7.76                  | 5.11 ± 0.44 | > 20                                | < 4.70      | 9.17                         | 5.04 ± 0.19 | > 20                         | < 4.70      |
| F-133    | 2.65                 | 5.58 ± 0.08 | 2.12                  | 5.67 ± 0.40 | > 20                                | < 4.70      | 6.35                         | 5.20 ± 0.25 | 18.91                        | 4.72 ± 0.02 |
| F-134    | 3.83                 | 5.42 ± 0.09 | 8.32                  | 5.08 ± 0.32 | > 20                                | < 4.70      | 1.25                         | 5.90 ± 0.25 | 9.19                         | 5.04 ± 0.13 |
| F-135    | 2.97                 | 5.53 ± 0.04 | 6.17                  | 5.21 ± 0.51 | > 20                                | < 4.70      | 3.41                         | 5.47 ± 0.23 | 1.88                         | 5.73 ± 0.18 |
| F-136    | 4.11                 | 5.39 ± 0.10 | 4.57                  | 5.34 ± 0.20 | > 20                                | < 4.70      | 5.50                         | 5.26 ± 0.17 | 17.65                        | 4.75 ± 0.05 |
| F-137    | 2.73                 | 5.56 ± 0.08 | 5.50                  | 5.26 ± 0.49 | > 20                                | < 4.70      | 4.17                         | 5.38 ± 0.19 | 4.75                         | 5.32 ± 0.33 |
| F-138    | 2.88                 | 5.54 ± 0.07 | 5.47                  | 5.26 ± 0.34 | > 20                                | < 4.70      | 1.31                         | 5.88 ± 0.15 | 4.68                         | 5.33 ± 0.11 |
| F-139    | 1.32                 | 5.88 ± 0.12 | 2.67                  | 5.57 ± 0.05 | > 20                                | < 4.70      | 0.96                         | 6.02 ± 0.20 | 6.03                         | 5.22 ± 0.06 |
| F-140    | 16.22                | 4.79 ± 0.08 | 4.90                  | 5.31 ± 0.25 | > 20                                | < 4.70      | 2.04                         | 5.69 ± 0.25 | 16.09                        | 4.79 ± 0.09 |
| F-141    | 0.45                 | 6.35 ± 0.08 | 1.74                  | 5.76 ± 0.10 | > 20                                | < 4.70      | 0.48                         | 6.32 ± 0.25 | 1.72                         | 5.76 ± 0.11 |
| F-142    | 3.07                 | 5.51 ± 0.08 | 4.94                  | 5.31 ± 0.39 | > 20                                | < 4.70      | 9.12                         | 5.04 ± 0.23 | 19.05                        | 4.72 ± 0.02 |
| F-143    | 3.00                 | 5.52 ± 0.16 | 6.17                  | 5.21 ± 0.22 | > 20                                | < 4.70      | 1.35                         | 5.87 ± 0.12 | 10.96                        | 4.96 ± 0.13 |
| F-144    | 8.91                 | 5.05 ± 0.05 | 8.38                  | 5.08 ± 0.17 | > 20                                | < 4.70      | 13.11                        | 4.88 ± 0.06 | > 20                         | < 4.70      |
| F-145    | 8.98                 | 5.05 ± 0.06 | 5.09                  | 5.29 ± 0.23 | > 20                                | < 4.70      | 6.35                         | 5.20 ± 0.24 | 3.02                         | 5.52 ± 0.41 |
| F-146    | 1.62                 | 5.79 ± 0.14 | 4.01                  | 5.40 ± 0.16 | > 20                                | < 4.70      | 5.80                         | 5.24 ± 0.22 | 10.88                        | 4.96 ± 0.13 |
| F-147    | 4.50                 | 5.35 ± 0.04 | 5.92                  | 5.23 ± 0.50 | > 20                                | < 4.70      | 12.59                        | 4.90 ± 0.10 | 13.39                        | 4.87 ± 0.06 |
| F-148    | 1.21                 | 5.92 ± 0.04 | 1.79                  | 5.75 ± 0.17 | 16.98                               | 4.77 ± 0.89 | 0.26                         | 6.58 ± 0.40 | 1.06                         | 5.98 ± 0.09 |
| F-149    | 0.15                 | 6.82 ± 0.21 | 5.09                  | 5.29 ± 0.16 | > 20                                | < 4.70      | 1.15                         | 5.94 ± 0.14 | 5.33                         | 5.27 ± 0.03 |
| F-150    | 1.91                 | 5.72 ± 0.13 | 2.01                  | 5.70 ± 0.23 | > 20                                | < 4.70      | 1.67                         | 5.78 ± 0.11 | 7.41                         | 5.13 ± 0.12 |
| F-151    | 3.36                 | 5.47 ± 0.02 | 6.81                  | 5.17 ± 0.19 | > 20                                | < 4.70      | 1.22                         | 5.91 ± 0.04 | 10.96                        | 4.96 ± 0.11 |
| F-152    | 10.12                | 5.00 ± 0.15 | 12.36                 | 4.91 ± 0.20 | > 20                                | < 4.70      | 4.54                         | 5.34 ± 0.22 | 7.88                         | 5.10 ± 0.20 |
| F-153    | 3.07                 | 5.51 ± 0.04 | 6.26                  | 5.20 ± 0.39 | > 20                                | < 4.70      | 0.98                         | 6.01 ± 0.08 | 15.02                        | 4.82 ± 0.07 |
| F-154    | 11.31                | 4.95 ± 0.02 | 1.00                  | 6.00 ± 0.43 | > 20                                | < 4.70      | 0.36                         | 6.44 ± 0.31 | 12.02                        | 4.92 ± 0.09 |
| F-155    | 4.17                 | 5.38 ± 0.14 | 4.90                  | 5.31 ± 0.21 | > 20                                | < 4.70      | 1.10                         | 5.96 ± 0.16 | 9.05                         | 5.04 ± 0.24 |
| F-156    | 0.81                 | 6.09 ± 0.07 | 1.31                  | 5.88 ± 0.19 | 18.20                               | 4.74 ± 0.04 | 0.26                         | 6.59 ± 0.15 | 7.13                         | 5.15 ± 0.05 |
| F-157    | 2.42                 | 5.62 ± 0.09 | 0.96                  | 6.02 ± 0.25 | 18.62                               | 4.73 ± 0.05 | 0.72                         | 6.15 ± 0.23 | 1.96                         | 5.71 ± 0.11 |
| F-158    | 2.55                 | 5.59 ± 0.07 | 3.49                  | 5.46 ± 0.19 | > 20                                | < 4.70      | 2.25                         | 5.65 ± 0.19 | 10.80                        | 4.97 ± 0.14 |
| F-159    | 11.31                | 4.95 ± 0.02 | 5.21                  | 5.28 ± 0.22 | > 20                                | < 4.70      | 11.35                        | 4.95 ± 0.03 | > 20                         | < 4.70      |
| F-160    | 6.51                 | 5.19 ± 0.11 | 17.65                 | 4.75 ± 0.09 | > 20                                | < 4.70      | 13.72                        | 4.86 ± 0.06 | > 20                         | < 4.70      |
| F-161    | 1.29                 | 5.89 ± 0.05 | 1.74                  | 5.76 ± 0.18 | > 20                                | < 4.70      | 2.63                         | 5.58 ± 0.07 | 14.34                        | 4.84 ± 0.08 |
| F-162    | 3.77                 | 5.42 ± 0.08 | 4.90                  | 5.31 ± 0.11 | > 20                                | < 4.70      | 10.39                        | 4.98 ± 0.02 | > 20                         | < 4.70      |
| F-163    | 1.41                 | 5.85 ± 0.10 | 1.58                  | 5.80 ± 0.15 | > 20                                | < 4.70      | 1.22                         | 5.92 ± 0.38 | 4.61                         | 5.34 ± 0.06 |

Activity against the indicated bacteria was determined as EC50 (in μM; geometric mean, n=3-6 experiments), the compound concentration that inhibits bacterial growth by 50%, and is also shown as negative log10 value of the EC50 (pEC50; mean ± SE, n=3-6 experiments).

**Table S5. Cytotoxicity in human cells and therapeutic ratio of 5-NI compounds**

| Compound | HeLa            |        | MzS <i>G. lamblia</i> | Therapeutic ratio |
|----------|-----------------|--------|-----------------------|-------------------|
|          | CC50 ( $\mu$ M) | pCC50  | EC50 ( $\mu$ M)       | CC50/EC50         |
| Mz       | > 50            | < 4.30 | 2.00                  | > 25              |
| A-101    | > 50            | < 4.30 | 1.06                  | > 47              |
| A-102    | > 50            | < 4.30 | 1.79                  | > 28              |
| A-103    | > 50            | < 4.30 | 0.21                  | > 235             |
| A-104    | > 50            | < 4.30 | 3.96                  | > 13              |
| A-105    | > 50            | < 4.30 | 4.64                  | > 11              |
| A-106    | > 50            | < 4.30 | 5.40                  | > 9               |
| A-107    | > 50            | < 4.30 | 2.49                  | > 20              |
| A-108    | > 50            | < 4.30 | 3.66                  | > 14              |
| A-109    | > 50            | < 4.30 | 3.55                  | > 14              |
| A-110    | > 50            | < 4.30 | 3.47                  | > 14              |
| A-111    | > 50            | < 4.30 | 0.95                  | > 53              |
| A-112    | > 50            | < 4.30 | 2.69                  | > 19              |
| A-113    | > 50            | < 4.30 | 0.63                  | > 79              |
| A-114    | > 50            | < 4.30 | 3.87                  | > 13              |
| A-115    | > 50            | < 4.30 | 3.62                  | > 14              |
| A-116    | > 50            | < 4.30 | 0.55                  | > 91              |
| A-117    | > 50            | < 4.30 | 0.08                  | > 651             |
| A-118    | > 50            | < 4.30 | 0.08                  | > 636             |
| A-119    | > 50            | < 4.30 | 0.49                  | > 102             |
| A-120    | > 50            | < 4.30 | 4.23                  | > 12              |
| A-121    | > 50            | < 4.30 | 2.31                  | > 22              |
| A-122    | > 50            | < 4.30 | 6.74                  | > 7               |
| A-123    | > 50            | < 4.30 | 2.79                  | > 18              |
| A-124    | > 50            | < 4.30 | 12.81                 | > 4               |
| A-125    | > 50            | < 4.30 | > 20                  | N/A               |
| A-126    | > 50            | < 4.30 | 5.28                  | > 9               |
| A-127    | > 50            | < 4.30 | 0.03                  | > 1488            |
| A-128    | > 50            | < 4.30 | 0.28                  | > 179             |
| A-129    | > 50            | < 4.30 | 0.13                  | > 380             |
| A-130    | > 50            | < 4.30 | 0.04                  | > 1244            |
| A-131    | > 50            | < 4.30 | 0.11                  | > 454             |
| A-132    | > 50            | < 4.30 | 19.09                 | > 3               |
| A-133    | > 50            | < 4.30 | 2.90                  | > 17              |
| A-134    | > 50            | < 4.30 | 0.20                  | > 244             |
| A-135    | > 50            | < 4.30 | 0.09                  | > 542             |
| A-136    | > 50            | < 4.30 | 1.26                  | > 40              |
| A-137    | > 50            | < 4.30 | 0.28                  | > 176             |
| A-138    | > 50            | < 4.30 | 0.31                  | > 163             |
| A-139    | > 50            | < 4.30 | 0.38                  | > 130             |
| A-140    | > 50            | < 4.30 | 0.18                  | > 282             |
| A-141    | > 50            | < 4.30 | 0.12                  | > 431             |
| A-142    | > 50            | < 4.30 | 14.31                 | > 3               |
| A-143    | > 50            | < 4.30 | 0.91                  | > 55              |
| A-144    | > 50            | < 4.30 | 14.31                 | > 3               |
| A-145    | > 50            | < 4.30 | 1.01                  | > 50              |
| A-146    | > 50            | < 4.30 | 0.08                  | > 609             |
| A-147    | > 50            | < 4.30 | 0.31                  | > 159             |



**Table S5. Cytotoxicity in human cells and therapeutic ratio of 5-NI compounds**

| Compound | HeLa            |                 | MzS <i>G. lamblia</i> | Therapeutic ratio |
|----------|-----------------|-----------------|-----------------------|-------------------|
|          | CC50 ( $\mu$ M) | pCC50           | EC50 ( $\mu$ M)       | CC50/EC50         |
| A-148    | > 50            | < 4.30          | 0.01                  | > 3752            |
| A-149    | > 50            | < 4.30          | 0.14                  | > 349             |
| A-150    | > 50            | < 4.30          | 0.31                  | > 163             |
| A-151    | 5.36            | 5.27 $\pm$ 0.06 | 0.11                  | 49                |
| A-152    | > 50            | < 4.30          | 1.19                  | > 42              |
| A-153    | > 50            | < 4.30          | 0.28                  | > 177             |
| A-154    | > 50            | < 4.30          | 0.41                  | > 122             |
| A-155    | > 50            | < 4.30          | 0.30                  | > 165             |
| A-156    | > 50            | < 4.30          | 0.37                  | > 136             |
| A-157    | > 50            | < 4.30          | 0.52                  | > 95              |
| A-158    | > 50            | < 4.30          | 1.44                  | > 35              |
| A-159    | > 50            | < 4.30          | 5.05                  | > 10              |
| A-160    | > 50            | < 4.30          | 6.31                  | > 8               |
| A-161    | > 50            | < 4.30          | 1.87                  | > 27              |
| A-162    | > 50            | < 4.30          | 4.23                  | > 12              |
| A-163    | > 50            | < 4.30          | 0.24                  | > 212             |
| B-101    | > 50            | < 4.30          | 1.18                  | > 42              |
| B-102    | > 50            | < 4.30          | 1.56                  | > 32              |
| B-103    | > 50            | < 4.30          | 0.40                  | > 124             |
| B-104    | > 50            | < 4.30          | 3.10                  | > 16              |
| B-105    | > 50            | < 4.30          | 5.52                  | > 9               |
| B-106    | > 50            | < 4.30          | 4.52                  | > 11              |
| B-107    | > 50            | < 4.30          | 1.65                  | > 30              |
| B-108    | > 50            | < 4.30          | 2.33                  | > 21              |
| B-109    | > 50            | < 4.30          | 3.87                  | > 13              |
| B-110    | > 50            | < 4.30          | 2.18                  | > 23              |
| B-111    | > 50            | < 4.30          | 0.92                  | > 54              |
| B-112    | > 50            | < 4.30          | 1.98                  | > 25              |
| B-113    | > 50            | < 4.30          | 0.59                  | > 84              |
| B-114    | > 50            | < 4.30          | 2.13                  | > 23              |
| B-115    | > 50            | < 4.30          | 3.10                  | > 16              |
| B-116    | > 50            | < 4.30          | 0.72                  | > 69              |
| B-117    | > 50            | < 4.30          | 0.26                  | > 194             |
| B-118    | > 50            | < 4.30          | 1.05                  | > 48              |
| B-119    | > 50            | < 4.30          | 1.19                  | > 42              |
| B-120    | > 50            | < 4.30          | 2.41                  | > 21              |
| B-121    | > 50            | < 4.30          | 2.25                  | > 22              |
| B-122    | > 50            | < 4.30          | 4.14                  | > 12              |
| B-123    | > 50            | < 4.30          | 0.92                  | > 54              |
| B-124    | > 50            | < 4.30          | 1.73                  | > 29              |
| B-125    | > 50            | < 4.30          | 14.00                 | > 4               |
| B-126    | > 50            | < 4.30          | 4.83                  | > 10              |
| B-127    | > 50            | < 4.30          | 0.31                  | > 159             |
| B-128    | > 50            | < 4.30          | 0.19                  | > 260             |
| B-129    | > 50            | < 4.30          | 0.16                  | > 314             |
| B-130    | 49.12           | 4.31 $\pm$ 0.29 | 0.11                  | 449               |
| B-131    | > 50            | < 4.30          | 0.17                  | > 300             |
| B-132    | > 50            | < 4.30          | 8.79                  | > 6               |

**Table S5. Cytotoxicity in human cells and therapeutic ratio of 5-NI compounds**

| Compound | HeLa            |        | MzS <i>G. lamblia</i> | Therapeutic ratio |
|----------|-----------------|--------|-----------------------|-------------------|
|          | CC50 ( $\mu$ M) | pCC50  | EC50 ( $\mu$ M)       | CC50/EC50         |
| B-133    | > 50            | < 4.30 | 2.07                  | > 24              |
| B-134    | > 50            | < 4.30 | 0.22                  | > 230             |
| B-135    | > 50            | < 4.30 | 0.31                  | > 163             |
| B-136    | > 50            | < 4.30 | 1.12                  | > 45              |
| B-137    | > 50            | < 4.30 | 1.68                  | > 30              |
| B-138    | > 50            | < 4.30 | 0.16                  | > 304             |
| B-139    | > 50            | < 4.30 | 0.32                  | > 157             |
| B-140    | > 50            | < 4.30 | 2.02                  | > 25              |
| B-141    | > 50            | < 4.30 | 0.56                  | > 89              |
| B-142    | > 50            | < 4.30 | 8.41                  | > 6               |
| B-143    | > 50            | < 4.30 | 0.87                  | > 58              |
| B-144    | > 50            | < 4.30 | 4.83                  | > 10              |
| B-145    | > 50            | < 4.30 | 0.35                  | > 145             |
| B-146    | > 50            | < 4.30 | 0.51                  | > 97              |
| B-147    | > 50            | < 4.30 | 1.06                  | > 47              |
| B-148    | > 50            | < 4.30 | 0.08                  | > 662             |
| B-149    | > 50            | < 4.30 | 0.62                  | > 81              |
| B-150    | > 50            | < 4.30 | 0.32                  | > 156             |
| B-151    | > 50            | < 4.30 | 0.86                  | > 58              |
| B-152    | > 50            | < 4.30 | 0.14                  | > 366             |
| B-153    | > 50            | < 4.30 | 0.49                  | > 102             |
| B-154    | > 50            | < 4.30 | 0.82                  | > 61              |
| B-155    | > 50            | < 4.30 | 0.11                  | > 441             |
| B-156    | > 50            | < 4.30 | 0.11                  | > 475             |
| B-157    | > 50            | < 4.30 | 0.53                  | > 94              |
| B-158    | > 50            | < 4.30 | 0.55                  | > 91              |
| B-159    | > 50            | < 4.30 | 2.30                  | > 22              |
| B-160    | > 50            | < 4.30 | 12.53                 | > 4               |
| B-161    | > 50            | < 4.30 | 0.78                  | > 64              |
| B-162    | > 50            | < 4.30 | 2.49                  | > 20              |
| B-163    | > 50            | < 4.30 | 0.15                  | > 331             |
| C-101    | > 50            | < 4.30 | 0.78                  | > 64              |
| C-102    | > 50            | < 4.30 | 1.30                  | > 38              |
| C-103    | > 50            | < 4.30 | 0.26                  | > 191             |
| C-104    | > 50            | < 4.30 | 1.16                  | > 43              |
| C-105    | > 50            | < 4.30 | 2.71                  | > 18              |
| C-106    | > 50            | < 4.30 | 3.67                  | > 14              |
| C-107    | > 50            | < 4.30 | 1.23                  | > 41              |
| C-108    | > 50            | < 4.30 | 2.68                  | > 19              |
| C-109    | > 50            | < 4.30 | 2.80                  | > 18              |
| C-110    | > 50            | < 4.30 | 1.93                  | > 26              |
| C-111    | > 50            | < 4.30 | 1.02                  | > 49              |
| C-112    | > 50            | < 4.30 | 1.00                  | > 50              |
| C-113    | > 50            | < 4.30 | 0.41                  | > 122             |
| C-114    | > 50            | < 4.30 | 0.95                  | > 52              |
| C-115    | > 50            | < 4.30 | 1.27                  | > 39              |
| C-116    | > 50            | < 4.30 | 0.59                  | > 84              |
| C-117    | > 50            | < 4.30 | 0.07                  | > 691             |

**Table S5. Cytotoxicity in human cells and therapeutic ratio of 5-NI compounds**

| Compound | HeLa            |                 | MzS <i>G. lamblia</i> | Therapeutic ratio |
|----------|-----------------|-----------------|-----------------------|-------------------|
|          | CC50 ( $\mu$ M) | pCC50           | EC50 ( $\mu$ M)       | CC50/EC50         |
| C-118    | > 50            | < 4.30          | 0.11                  | > 470             |
| C-119    | > 50            | < 4.30          | 0.65                  | > 77              |
| C-120    | > 50            | < 4.30          | 1.79                  | > 28              |
| C-121    | > 50            | < 4.30          | 1.34                  | > 37              |
| C-122    | > 50            | < 4.30          | 1.87                  | > 27              |
| C-123    | > 50            | < 4.30          | 0.56                  | > 89              |
| C-124    | > 50            | < 4.30          | 2.12                  | > 24              |
| C-125    | > 50            | < 4.30          | 4.08                  | > 12              |
| C-126    | > 50            | < 4.30          | 2.21                  | > 23              |
| C-127    | > 50            | < 4.30          | 0.16                  | > 304             |
| C-128    | > 50            | < 4.30          | 0.99                  | > 51              |
| C-129    | > 50            | < 4.30          | 0.37                  | > 137             |
| C-130    | > 50            | < 4.30          | 0.05                  | > 921             |
| C-131    | > 50            | < 4.30          | 0.18                  | > 282             |
| C-132    | > 50            | < 4.30          | 4.31                  | > 12              |
| C-133    | 43.88           | 4.36 $\pm$ 0.15 | 1.37                  | 32                |
| C-134    | > 50            | < 4.30          | 0.29                  | > 175             |
| C-135    | > 50            | < 4.30          | 0.36                  | > 139             |
| C-136    | > 50            | < 4.30          | 0.87                  | > 58              |
| C-137    | > 50            | < 4.30          | 0.16                  | > 312             |
| C-138    | > 50            | < 4.30          | 0.26                  | > 190             |
| C-139    | > 50            | < 4.30          | 0.37                  | > 136             |
| C-140    | > 50            | < 4.30          | 0.44                  | > 113             |
| C-141    | > 50            | < 4.30          | 0.19                  | > 263             |
| C-142    | > 50            | < 4.30          | 0.86                  | > 58              |
| C-143    | > 50            | < 4.30          | 1.43                  | > 35              |
| C-144    | > 50            | < 4.30          | 0.56                  | > 90              |
| C-145    | > 50            | < 4.30          | 0.65                  | > 77              |
| C-146    | > 50            | < 4.30          | 0.60                  | > 84              |
| C-147    | > 50            | < 4.30          | 0.32                  | > 155             |
| C-148    | > 50            | < 4.30          | 0.50                  | > 100             |
| C-149    | > 50            | < 4.30          | 0.45                  | > 110             |
| C-150    | > 50            | < 4.30          | 0.28                  | > 178             |
| C-151    | 40.17           | 4.40 $\pm$ 0.14 | 0.75                  | 53                |
| C-152    | > 50            | < 4.30          | 1.93                  | > 26              |
| C-153    | > 50            | < 4.30          | 2.31                  | > 22              |
| C-154    | > 50            | < 4.30          | 1.98                  | > 25              |
| C-155    | > 50            | < 4.30          | 0.36                  | > 139             |
| C-156    | > 50            | < 4.30          | 0.42                  | > 120             |
| C-157    | > 50            | < 4.30          | 0.41                  | > 121             |
| C-158    | > 50            | < 4.30          | 0.11                  | > 459             |
| C-159    | > 50            | < 4.30          | 1.47                  | > 34              |
| C-160    | > 50            | < 4.30          | 7.33                  | > 7               |
| C-161    | > 50            | < 4.30          | 0.74                  | > 68              |
| C-162    | > 50            | < 4.30          | 1.92                  | > 26              |
| C-163    | > 50            | < 4.30          | 0.30                  | > 165             |
| D-101    | > 50            | < 4.30          | 15.56                 | > 3               |
| D-102    | > 50            | < 4.30          | 16.09                 | > 3               |

**Table S5. Cytotoxicity in human cells and therapeutic ratio of 5-NI compounds**

| Compound | HeLa            |        | MzS <i>G. lamblia</i> | Therapeutic ratio |
|----------|-----------------|--------|-----------------------|-------------------|
|          | CC50 ( $\mu$ M) | pCC50  | EC50 ( $\mu$ M)       | CC50/EC50         |
| D-103    | > 50            | < 4.30 | 9.62                  | > 5               |
| D-104    | > 50            | < 4.30 | 12.14                 | > 4               |
| D-105    | > 50            | < 4.30 | 19.09                 | > 3               |
| D-106    | > 50            | < 4.30 | > 20                  | N/A               |
| D-107    | > 50            | < 4.30 | 12.68                 | > 4               |
| D-108    | > 50            | < 4.30 | 12.83                 | > 4               |
| D-109    | > 50            | < 4.30 | 13.26                 | > 4               |
| D-110    | > 50            | < 4.30 | 12.14                 | > 4               |
| D-111    | > 50            | < 4.30 | 5.91                  | > 8               |
| D-112    | > 50            | < 4.30 | 10.17                 | > 5               |
| D-113    | > 50            | < 4.30 | 4.88                  | > 10              |
| D-114    | > 50            | < 4.30 | 10.63                 | > 5               |
| D-115    | > 50            | < 4.30 | 10.86                 | > 5               |
| D-116    | > 50            | < 4.30 | 12.14                 | > 4               |
| D-117    | > 50            | < 4.30 | 9.20                  | > 5               |
| D-118    | > 50            | < 4.30 | 7.31                  | > 7               |
| D-119    | > 50            | < 4.30 | 10.39                 | > 5               |
| D-120    | > 50            | < 4.30 | 11.87                 | > 4               |
| D-121    | > 50            | < 4.30 | 8.80                  | > 6               |
| D-122    | > 50            | < 4.30 | 11.11                 | > 5               |
| D-123    | > 50            | < 4.30 | 1.10                  | > 46              |
| D-124    | > 50            | < 4.30 | 12.00                 | > 4               |
| D-125    | > 50            | < 4.30 | 13.26                 | > 4               |
| D-126    | > 50            | < 4.30 | 16.72                 | > 3               |
| D-127    | > 50            | < 4.30 | 6.78                  | > 7               |
| D-128    | > 50            | < 4.30 | 7.14                  | > 7               |
| D-129    | > 50            | < 4.30 | 14.33                 | > 3               |
| D-130    | > 50            | < 4.30 | 3.84                  | > 13              |
| D-131    | > 50            | < 4.30 | 4.84                  | > 10              |
| D-132    | > 50            | < 4.30 | 14.49                 | > 3               |
| D-133    | > 50            | < 4.30 | 14.49                 | > 3               |
| D-134    | > 50            | < 4.30 | 13.27                 | > 4               |
| D-135    | > 50            | < 4.30 | 2.40                  | > 21              |
| D-136    | > 50            | < 4.30 | 14.64                 | > 3               |
| D-137    | > 50            | < 4.30 | 8.44                  | > 6               |
| D-138    | > 50            | < 4.30 | 11.48                 | > 4               |
| D-139    | > 50            | < 4.30 | 11.48                 | > 4               |
| D-140    | > 50            | < 4.30 | 5.65                  | > 9               |
| D-141    | > 50            | < 4.30 | 7.50                  | > 7               |
| D-142    | > 50            | < 4.30 | 6.76                  | > 7               |
| D-143    | > 50            | < 4.30 | 10.51                 | > 5               |
| D-144    | > 50            | < 4.30 | 11.23                 | > 4               |
| D-145    | > 50            | < 4.30 | 1.79                  | > 28              |
| D-146    | > 50            | < 4.30 | 5.93                  | > 8               |
| D-147    | > 50            | < 4.30 | 2.39                  | > 21              |
| D-148    | > 50            | < 4.30 | 7.62                  | > 7               |
| D-149    | > 50            | < 4.30 | 7.79                  | > 6               |
| D-150    | > 50            | < 4.30 | 3.27                  | > 15              |

**Table S5. Cytotoxicity in human cells and therapeutic ratio of 5-NI compounds**

| Compound | HeLa            |                 | MzS <i>G. lamblia</i> | Therapeutic ratio |
|----------|-----------------|-----------------|-----------------------|-------------------|
|          | CC50 ( $\mu$ M) | pCC50           | EC50 ( $\mu$ M)       | CC50/EC50         |
| D-151    | > 50            | < 4.30          | 9.73                  | > 5               |
| D-152    | > 50            | < 4.30          | 5.20                  | > 10              |
| D-153    | > 50            | < 4.30          | 4.01                  | > 12              |
| D-154    | > 50            | < 4.30          | 8.43                  | > 6               |
| D-155    | > 50            | < 4.30          | 5.49                  | > 9               |
| D-156    | > 50            | < 4.30          | 7.26                  | > 7               |
| D-157    | > 50            | < 4.30          | 3.66                  | > 14              |
| D-158    | > 50            | < 4.30          | 11.87                 | > 4               |
| D-159    | > 50            | < 4.30          | 11.36                 | > 4               |
| D-160    | > 50            | < 4.30          | 11.35                 | > 4               |
| D-161    | > 50            | < 4.30          | 9.41                  | > 5               |
| D-162    | > 50            | < 4.30          | 7.97                  | > 6               |
| D-163    | > 50            | < 4.30          | > 20                  | N/A               |
| E-101    | > 50            | < 4.30          | 0.01                  | > 4149            |
| E-102    | > 50            | < 4.30          | 0.02                  | > 3135            |
| E-103    | > 50            | < 4.30          | 0.04                  | > 1152            |
| E-104    | > 50            | < 4.30          | 0.06                  | > 792             |
| E-105    | > 50            | < 4.30          | 0.10                  | > 496             |
| E-106    | > 50            | < 4.30          | 0.10                  | > 508             |
| E-107    | > 50            | < 4.30          | 0.02                  | > 2769            |
| E-108    | > 50            | < 4.30          | 0.07                  | > 751             |
| E-109    | > 50            | < 4.30          | 0.07                  | > 717             |
| E-110    | > 50            | < 4.30          | 0.07                  | > 740             |
| E-111    | 40.74           | 4.39 $\pm$ 0.04 | 0.09                  | 447               |
| E-112    | > 50            | < 4.30          | 0.02                  | > 2665            |
| E-113    | 23.07           | 4.64 $\pm$ 0.03 | 0.01                  | 1646              |
| E-114    | 37.24           | 4.43 $\pm$ 0.06 | 0.03                  | > 1107            |
| E-115    | 30.20           | 4.52 $\pm$ 0.07 | 0.06                  | > 497             |
| E-116    | > 50            | < 4.30          | 0.01                  | > 9447            |
| E-117    | > 50            | < 4.30          | 0.04                  | > 1421            |
| E-118    | > 50            | < 4.30          | 0.02                  | > 2048            |
| E-119    | > 50            | < 4.30          | 0.03                  | > 1652            |
| E-120    | > 50            | < 4.30          | 0.01                  | > 4402            |
| E-121    | > 50            | < 4.30          | 0.01                  | > 7068            |
| E-122    | > 50            | < 4.30          | 0.02                  | > 2525            |
| E-123    | > 50            | < 4.30          | 0.01                  | > 3735            |
| E-124    | > 50            | < 4.30          | 0.45                  | > 112             |
| E-125    | > 50            | < 4.30          | 0.02                  | > 2053            |
| E-126    | > 50            | < 4.30          | 0.05                  | > 1012            |
| E-127    | > 50            | < 4.30          | 0.14                  | > 350             |
| E-128    | > 50            | < 4.30          | 0.01                  | > 4172            |
| E-129    | > 50            | < 4.30          | 0.03                  | > 1615            |
| E-130    | > 50            | < 4.30          | 0.02                  | > 2076            |
| E-131    | > 50            | < 4.30          | 0.04                  | > 1317            |
| E-132    | > 50            | < 4.30          | 0.42                  | > 119             |
| E-133    | > 50            | < 4.30          | 0.03                  | > 1435            |
| E-134    | > 50            | < 4.30          | 0.01                  | > 5956            |
| E-135    | > 50            | < 4.30          | > 20                  | N/A               |

**Table S5. Cytotoxicity in human cells and therapeutic ratio of 5-NI compounds**

| Compound | HeLa            |                 | MzS <i>G. lamblia</i> | Therapeutic ratio |
|----------|-----------------|-----------------|-----------------------|-------------------|
|          | CC50 ( $\mu$ M) | pCC50           | EC50 ( $\mu$ M)       | CC50/EC50         |
| E-136    | > 50            | < 4.30          | 0.01                  | > 7626            |
| E-137    | > 50            | < 4.30          | 0.05                  | > 951             |
| E-138    | 40.77           | 4.39 $\pm$ 0.39 | 0.01                  | > 2721            |
| E-139    | > 50            | < 4.30          | 0.01                  | > 4823            |
| E-140    | 40.77           | 4.39 $\pm$ 0.39 | 0.07                  | > 618             |
| E-141    | > 50            | < 4.30          | 0.01                  | > 4124            |
| E-142    | > 50            | < 4.30          | 0.13                  | > 394             |
| E-143    | > 50            | < 4.30          | 0.01                  | > 8603            |
| E-144    | > 50            | < 4.30          | 0.39                  | > 130             |
| E-145    | > 50            | < 4.30          | 0.00                  | > 16774           |
| E-146    | > 50            | < 4.30          | 0.02                  | > 2086            |
| E-147    | > 50            | < 4.30          | 0.05                  | > 920             |
| E-148    | 45.64           | 4.34 $\pm$ 0.34 | 0.01                  | > 3131            |
| E-149    | > 50            | < 4.30          | 0.01                  | > 3656            |
| E-150    | > 50            | < 4.30          | 0.01                  | > 7117            |
| E-151    | 40.97           | 4.39 $\pm$ 0.39 | 0.04                  | > 955             |
| E-152    | > 50            | < 4.30          | 0.20                  | > 249             |
| E-153    | > 50            | < 4.30          | 0.03                  | > 1668            |
| E-154    | > 50            | < 4.30          | 0.03                  | > 1429            |
| E-155    | > 50            | < 4.30          | 0.01                  | > 8215            |
| E-156    | > 50            | < 4.30          | 0.01                  | > 6048            |
| E-157    | > 50            | < 4.30          | 0.01                  | > 7989            |
| E-158    | > 50            | < 4.30          | 0.00                  | > 10383           |
| E-159    | > 50            | < 4.30          | 0.01                  | > 3690            |
| E-160    | > 50            | < 4.30          | 0.08                  | > 606             |
| E-161    | > 50            | < 4.30          | 0.01                  | > 7435            |
| E-162    | > 50            | < 4.30          | 0.03                  | > 1774            |
| E-163    | > 50            | < 4.30          | 0.04                  | > 1398            |
| F-101    | > 50            | < 4.30          | 0.65                  | > 77              |
| F-102    | > 50            | < 4.30          | 0.50                  | > 100             |
| F-103    | > 50            | < 4.30          | 0.09                  | > 575             |
| F-104    | > 50            | < 4.30          | 0.95                  | > 53              |
| F-105    | > 50            | < 4.30          | 0.74                  | > 68              |
| F-106    | > 50            | < 4.30          | 1.01                  | > 49              |
| F-107    | > 50            | < 4.30          | 0.59                  | > 84              |
| F-108    | > 50            | < 4.30          | 0.41                  | > 123             |
| F-109    | > 50            | < 4.30          | 0.48                  | > 104             |
| F-110    | > 50            | < 4.30          | 0.22                  | > 232             |
| F-111    | > 50            | < 4.30          | 3.02                  | > 17              |
| F-112    | > 50            | < 4.30          | 0.26                  | > 191             |
| F-113    | > 50            | < 4.30          | 0.35                  | > 142             |
| F-114    | > 50            | < 4.30          | 3.02                  | > 17              |
| F-115    | > 50            | < 4.30          | 0.92                  | > 54              |
| F-116    | > 50            | < 4.30          | 1.49                  | > 33              |
| F-117    | > 50            | < 4.30          | 0.03                  | > 1677            |
| F-118    | 44.86           | 4.35 $\pm$ 0.09 | 0.04                  | > 1255            |
| F-119    | > 50            | < 4.30          | 0.72                  | > 69              |
| F-120    | > 50            | < 4.30          | 3.03                  | > 16              |

**Table S5. Cytotoxicity in human cells and therapeutic ratio of 5-NI compounds**

| Compound | HeLa            |                 | MzS <i>G. lamblia</i> | Therapeutic ratio |
|----------|-----------------|-----------------|-----------------------|-------------------|
|          | CC50 ( $\mu$ M) | pCC50           | EC50 ( $\mu$ M)       | CC50/EC50         |
| F-121    | > 50            | < 4.30          | 1.33                  | > 38              |
| F-122    | > 50            | < 4.30          | 6.61                  | > 8               |
| F-123    | > 50            | < 4.30          | 0.36                  | > 138             |
| F-124    | > 50            | < 4.30          | 0.72                  | > 70              |
| F-125    | > 50            | < 4.30          | 2.49                  | > 20              |
| F-126    | > 50            | < 4.30          | 0.90                  | > 56              |
| F-127    | > 50            | < 4.30          | 0.09                  | > 574             |
| F-128    | > 50            | < 4.30          | 1.39                  | > 36              |
| F-129    | > 50            | < 4.30          | 0.76                  | > 65              |
| F-130    | > 50            | < 4.30          | 1.07                  | > 47              |
| F-131    | > 50            | < 4.30          | 0.19                  | > 261             |
| F-132    | > 50            | < 4.30          | 2.60                  | > 19              |
| F-133    | > 50            | < 4.30          | 0.65                  | > 77              |
| F-134    | > 50            | < 4.30          | 0.20                  | > 248             |
| F-135    | > 50            | < 4.30          | 1.59                  | > 32              |
| F-136    | > 50            | < 4.30          | 0.51                  | > 98              |
| F-137    | 18.18           | 4.74 $\pm$ 0.66 | 0.63                  | > 29              |
| F-138    | > 50            | < 4.30          | 0.12                  | > 431             |
| F-139    | > 50            | < 4.30          | 0.06                  | > 828             |
| F-140    | > 50            | < 4.30          | 4.48                  | > 11              |
| F-141    | > 50            | < 4.30          | 0.04                  | > 1227            |
| F-142    | > 50            | < 4.30          | 1.12                  | > 45              |
| F-143    | > 50            | < 4.30          | 0.10                  | > 496             |
| F-144    | > 50            | < 4.30          | 1.39                  | > 36              |
| F-145    | > 50            | < 4.30          | 0.83                  | > 61              |
| F-146    | > 50            | < 4.30          | 0.02                  | > 2510            |
| F-147    | > 50            | < 4.30          | 0.19                  | > 265             |
| F-148    | > 50            | < 4.30          | 0.02                  | > 2247            |
| F-149    | 43.88           | 4.36 $\pm$ 0.03 | 0.02                  | > 2220            |
| F-150    | > 50            | < 4.30          | 0.09                  | > 551             |
| F-151    | > 50            | < 4.30          | 0.38                  | > 131             |
| F-152    | > 50            | < 4.30          | 0.50                  | > 101             |
| F-153    | > 50            | < 4.30          | 0.03                  | > 1608            |
| F-154    | > 50            | < 4.30          | 0.06                  | > 883             |
| F-155    | > 50            | < 4.30          | 0.05                  | > 918             |
| F-156    | > 50            | < 4.30          | 0.02                  | > 2659            |
| F-157    | 10.85           | 4.96 $\pm$ 0.01 | 0.04                  | > 271             |
| F-158    | > 50            | < 4.30          | 0.09                  | > 548             |
| F-159    | > 50            | < 4.30          | 1.99                  | > 25              |
| F-160    | > 50            | < 4.30          | 2.49                  | > 20              |
| F-161    | > 50            | < 4.30          | 0.29                  | > 171             |
| F-162    | > 50            | < 4.30          | 1.16                  | > 43              |
| F-163    | > 50            | < 4.30          | 0.09                  | > 532             |

Toxicity against the human HeLa cells was determined as CC50 (in  $\mu$ M; geometric mean, n=3-6 experiments), the compound concentration that kills 50% of HeLa cells in a cytotoxicity assay, is also shown as negative log<sub>10</sub> value of the CC50 (pCC50; mean  $\pm$  SE, n=3-6 experiments). Therapeutic ratio, the ratio of CC50 in HeLa cells to EC50 of *G. lamblia* (strain 713), reflects the relative selectivity of compound potency against *Giardia* compared to cytotoxicity in HeLa cells, with higher ratios indicating greater selectivity for the parasite.

**Table S6a. Structures of core A-C test compounds**

| Alkyne | Core A |           | Core B |           | Core C |           |
|--------|--------|-----------|--------|-----------|--------|-----------|
|        | Name   | Structure | Name   | Structure | Name   | Structure |
| 201    | A-201  |           | B-201  |           | C-201  |           |
| 202    | A-202  |           | B-202  |           | C-202  |           |
| 203    | A-203  |           | B-203  |           | C-203  |           |
| 204    | A-204  |           | B-204  |           | C-204  |           |
| 205    | A-205  |           | B-205  |           | C-205  |           |
| 206    | A-206  |           | B-206  |           | C-206  |           |
| 207    | A-207  |           | B-207  |           | C-207  |           |
| 208    | A-208  |           | B-208  |           | C-208  |           |
| 209    | A-209  |           | B-209  |           | C-209  |           |
| 210    | A-210  |           | B-210  |           | C-210  |           |
| 211    | A-211  |           | B-211  |           | C-211  |           |
| 212    | A-212  |           | B-212  |           | C-212  |           |
| 213    | A-213  |           | B-213  |           | C-213  |           |



**Table S6a. Structures of core A-C test compounds**

| Alkyne | Core A |           | Core B |           | Core C |           |
|--------|--------|-----------|--------|-----------|--------|-----------|
|        | Name   | Structure | Name   | Structure | Name   | Structure |
| 214    | A-214  |           | B-214  |           | C-214  |           |
| 215    | A-215  |           | B-215  |           | C-215  |           |
| 216    | A-216  |           | B-216  |           | C-216  |           |
| 217    | A-217  |           | B-217  |           | C-217  |           |
| 218    | A-218  |           | B-218  |           | C-218  |           |
| 219    | A-219  |           | B-219  |           | C-219  |           |
| 220    | A-220  |           | B-220  |           | C-220  |           |
| 221    | A-221  |           | B-221  |           | C-221  |           |
| 222    | A-222  |           | B-222  |           | C-222  |           |
| 223    | A-223  |           | B-223  |           | C-223  |           |
| 224    | A-224  |           | B-224  |           | C-224  |           |
| 225    | A-225  |           | B-225  |           | C-225  |           |
| 226    | A-226  |           | B-226  |           | C-226  |           |

**Table S6a. Structures of core A-C test compounds**

| Alkyne | Core A |           | Core B |           | Core C |           |
|--------|--------|-----------|--------|-----------|--------|-----------|
|        | Name   | Structure | Name   | Structure | Name   | Structure |
| 227    | A-227  |           | B-227  |           | C-227  |           |
| 228    | A-228  |           | B-228  |           | C-228  |           |
| 229    | A-229  |           | B-229  |           | C-229  |           |
| 230    | A-230  |           | B-230  |           | C-230  |           |
| 231    | A-231  |           | B-231  |           | C-231  |           |
| 232    | A-232  |           | B-232  |           | C-232  |           |
| 233    | A-233  |           | B-233  |           | C-233  |           |
| 234    | A-234  |           | B-234  |           | C-234  |           |
| 235    | A-235  |           | B-235  |           | C-235  |           |
| 236    | A-236  |           | B-236  |           | C-236  |           |
| 237    | A-237  |           | B-237  |           | C-237  |           |
| 238    | A-238  |           | B-238  |           | C-238  |           |
| 239    | A-239  |           | B-239  |           | C-239  |           |
| 240    | A-240  |           | B-240  |           | C-240  |           |

**Table S6a. Structures of core A-C test compounds**

| Alkyne | Core A |           | Core B |           | Core C |           |
|--------|--------|-----------|--------|-----------|--------|-----------|
|        | Name   | Structure | Name   | Structure | Name   | Structure |
| 241    | A-241  |           | B-241  |           | C-241  |           |
| 242    | A-242  |           | B-242  |           | C-242  |           |
| 243    | A-243  |           | B-243  |           | C-243  |           |
| 244    | A-244  |           | B-244  |           | C-244  |           |
| 245    | A-245  |           | B-245  |           | C-245  |           |
| 246    | A-246  |           | B-246  |           | C-246  |           |
| 247    | A-247  |           | B-247  |           | C-247  |           |

**Table S6b. Structures of core D-F test compounds**

| Alkynes | Core D |           | Core E |           | Core F |           |
|---------|--------|-----------|--------|-----------|--------|-----------|
|         | Name   | Structure | Name   | Structure | Name   | Structure |
| 201     | D-201  |           | E-201  |           | F-201  |           |
| 202     | D-202  |           | E-202  |           | F-202  |           |
| 203     | D-203  |           | E-203  |           | F-203  |           |
| 204     | D-204  |           | E-204  |           | F-204  |           |
| 205     | D-205  |           | E-205  |           | F-205  |           |
| 206     | D-206  |           | E-206  |           | F-206  |           |
| 207     | D-207  |           | E-207  |           | F-207  |           |
| 208     | D-208  |           | E-208  |           | F-208  |           |
| 209     | D-209  |           | E-209  |           | F-209  |           |
| 210     | D-210  |           | E-210  |           | F-210  |           |

**Table S6b. Structures of core D-F test compounds**

| Alkynes | Core D |           | Core E |           | Core F |           |
|---------|--------|-----------|--------|-----------|--------|-----------|
|         | Name   | Structure | Name   | Structure | Name   | Structure |
| 211     | D-211  |           | E-211  |           | F-211  |           |
| 212     | D-212  |           | E-212  |           | F-212  |           |
| 213     | D-213  |           | E-213  |           | F-213  |           |
| 214     |        |           | E-214  |           | F-214  |           |
| 215     | D-215  |           | E-215  |           | F-215  |           |
| 216     | D-216  |           | E-216  |           | F-216  |           |
| 217     | D-217  |           | E-217  |           | F-217  |           |
| 218     | D-218  |           | E-218  |           | F-218  |           |
| 219     | D-219  |           | E-219  |           | F-219  |           |
| 220     | D-220  |           | E-220  |           | F-220  |           |

**Table S6b. Structures of core D-F test compounds**

| Alkynes | Core D |           | Core E |           | Core F |           |
|---------|--------|-----------|--------|-----------|--------|-----------|
|         | Name   | Structure | Name   | Structure | Name   | Structure |
| 221     | D-221  |           | E-221  |           | F-221  |           |
| 222     | D-222  |           | E-222  |           | F-222  |           |
| 223     | D-223  |           | E-223  |           | F-223  |           |
| 224     | D-224  |           | E-224  |           | F-224  |           |
| 225     | D-225  |           | E-225  |           | F-225  |           |
| 226     | D-226  |           | E-226  |           | F-226  |           |
| 227     | D-227  |           | E-227  |           | F-227  |           |
| 228     | D-228  |           | E-228  |           | F-228  |           |
| 229     | D-229  |           | E-229  |           | F-229  |           |
| 230     | D-230  |           | E-230  |           | F-230  |           |
| 231     | D-231  |           | E-231  |           | F-231  |           |

**Table S6b. Structures of core D-F test compounds**

| Alkynes | Core D |           | Core E |           | Core F |           |
|---------|--------|-----------|--------|-----------|--------|-----------|
|         | Name   | Structure | Name   | Structure | Name   | Structure |
| 232     | D-232  |           | E-232  |           | F-232  |           |
| 233     | D-233  |           | E-233  |           | F-233  |           |
| 234     | D-234  |           | E-234  |           | F-234  |           |
| 235     | D-235  |           | E-235  |           | F-235  |           |
| 236     | D-236  |           | E-236  |           | F-236  |           |
| 237     | D-237  |           | E-237  |           | F-237  |           |
| 238     | D-238  |           | E-238  |           | F-238  |           |
| 239     | D-239  |           | E-239  |           | F-239  |           |
| 240     | D-240  |           | E-240  |           | F-240  |           |
| 241     | D-241  |           | E-241  |           | F-241  |           |

**Table S6b. Structures of core D-F test compounds**

| Alkynes | Core D |           | Core E |           | Core F |           |
|---------|--------|-----------|--------|-----------|--------|-----------|
|         | Name   | Structure | Name   | Structure | Name   | Structure |
| 242     | D-242  |           | E-242  |           | F-242  |           |
| 243     | D-243  |           | E-243  |           | F-243  |           |
| 244     | D-244  |           | E-244  |           | F-244  |           |
| 245     | D-245  |           | E-245  |           | F-245  |           |
| 246     | D-246  |           | E-246  |           | F-246  |           |
| 247     | D-247  |           | E-247  |           | F-247  |           |



**Table S7. Activity of 5-NI test compounds against *Giardia lamblia***

| Compound | <i>G. lamblia</i> 713 |             |           |             | <i>G. lamblia</i> 106 |             |           |             |
|----------|-----------------------|-------------|-----------|-------------|-----------------------|-------------|-----------|-------------|
|          | MzS                   |             | MzR       |             | MzS                   |             | MzR       |             |
|          | EC50 (μM)             | pEC50       | EC50 (μM) | pEC50       | EC50 (μM)             | pEC50       | EC50 (μM) | pEC50       |
| Mz       | 1.995                 | 5.70 ± 0.01 | 50.119    | 4.30 ± 0.02 | 3.631                 | 5.44 ± 0.01 | 77.625    | 4.11 ± 0.02 |
| A-201    | 12.531                | 4.90 ± 0.02 | 17.470    | 4.76 ± 0.06 | 2.610                 | 5.58 ± 0.19 | 9.772     | 5.01 ± 0.12 |
| A-202    | 0.161                 | 6.79 ± 0.04 | 1.271     | 5.90 ± 0.16 | 0.220                 | 6.66 ± 0.13 | 2.466     | 5.61 ± 0.11 |
| A-203    | 0.438                 | 6.36 ± 0.03 | 6.166     | 5.21 ± 0.08 | 0.666                 | 6.18 ± 0.18 | 3.162     | 5.50 ± 0.10 |
| A-204    | 0.179                 | 6.75 ± 0.01 | 2.349     | 5.63 ± 0.13 | 0.278                 | 6.56 ± 0.22 | 1.622     | 5.79 ± 0.07 |
| A-205    | 2.970                 | 5.53 ± 0.04 | 10.859    | 4.96 ± 0.18 | 3.090                 | 5.51 ± 0.21 | 10.715    | 4.97 ± 0.14 |
| A-206    | 1.076                 | 5.97 ± 0.09 | 8.707     | 5.06 ± 0.10 | 2.630                 | 5.58 ± 0.42 | 11.394    | 4.94 ± 0.13 |
| A-207    | 0.456                 | 6.34 ± 0.02 | 6.442     | 5.19 ± 0.06 | 0.457                 | 6.34 ± 0.09 | 2.265     | 5.65 ± 0.19 |
| A-208    | 0.299                 | 6.52 ± 0.20 | 0.972     | 6.01 ± 0.27 | 0.154                 | 6.81 ± 0.46 | 0.452     | 6.35 ± 0.28 |
| A-209    | 0.070                 | 7.16 ± 0.21 | 0.248     | 6.61 ± 0.39 | 0.142                 | 6.85 ± 0.35 | 0.631     | 6.20 ± 0.23 |
| A-210    | 1.061                 | 5.97 ± 0.02 | 7.291     | 5.14 ± 0.08 | 1.122                 | 5.95 ± 0.08 | 7.703     | 5.11 ± 0.14 |
| A-211    | 1.253                 | 5.90 ± 0.05 | 15.993    | 4.80 ± 0.05 | 1.685                 | 5.77 ± 0.12 | 6.556     | 5.18 ± 0.13 |
| A-212    | 2.600                 | 5.59 ± 0.04 | 18.066    | 4.74 ± 0.04 | 3.067                 | 5.51 ± 0.22 | 10.965    | 4.96 ± 0.10 |
| A-213    | 2.273                 | 5.64 ± 0.04 | 15.647    | 4.81 ± 0.07 | 2.326                 | 5.63 ± 0.11 | 7.244     | 5.14 ± 0.13 |
| A-214    | 1.662                 | 5.78 ± 0.03 | 5.348     | 5.27 ± 0.05 | 1.806                 | 5.74 ± 0.10 | 7.413     | 5.13 ± 0.18 |
| A-215    | 7.529                 | 5.12 ± 0.08 | > 20      | < 4.70      | 5.089                 | 5.29 ± 0.18 | 12.397    | 4.91 ± 0.13 |
| A-216    | 18.670                | 4.73 ± 0.03 | 18.674    | 4.73 ± 0.03 | 6.407                 | 5.19 ± 0.13 | 13.804    | 4.86 ± 0.08 |
| A-217    | 0.858                 | 6.07 ± 0.06 | 3.914     | 5.41 ± 0.12 | 2.065                 | 5.69 ± 0.43 | 17.378    | 4.76 ± 0.06 |
| A-218    | > 20                  | < 4.70      | 12.532    | 4.90 ± 0.19 | 4.241                 | 5.37 ± 0.34 | 14.905    | 4.83 ± 0.07 |
| A-219    | 0.225                 | 6.65 ± 0.02 | 5.473     | 5.26 ± 0.17 | 0.363                 | 6.44 ± 0.12 | 2.818     | 5.55 ± 0.17 |
| A-220    | 0.038                 | 7.42 ± 0.07 | 0.701     | 6.15 ± 0.23 | 0.052                 | 7.28 ± 0.20 | 1.006     | 6.00 ± 0.26 |
| A-221    | 12.439                | 4.91 ± 0.14 | 15.825    | 4.80 ± 0.10 | 5.721                 | 5.24 ± 0.16 | 14.962    | 4.83 ± 0.07 |
| A-222    | 1.607                 | 5.79 ± 0.06 | 15.305    | 4.82 ± 0.07 | 1.806                 | 5.74 ± 0.10 | 15.668    | 4.81 ± 0.08 |
| A-223    | 2.558                 | 5.59 ± 0.02 | 11.604    | 4.94 ± 0.03 | 5.623                 | 5.25 ± 0.10 | 16.312    | 4.79 ± 0.06 |
| A-224    | 0.419                 | 6.38 ± 0.07 | 10.984    | 4.96 ± 0.10 | 0.794                 | 6.10 ± 0.13 | 3.487     | 5.46 ± 0.26 |
| A-225    | 0.164                 | 6.78 ± 0.05 | 5.292     | 5.28 ± 0.09 | 0.263                 | 6.58 ± 0.12 | 3.868     | 5.41 ± 0.10 |
| A-226    | 0.393                 | 6.41 ± 0.03 | 5.912     | 5.23 ± 0.10 | 0.838                 | 6.08 ± 0.12 | 6.569     | 5.18 ± 0.12 |
| A-227    | 0.198                 | 6.70 ± 0.06 | 1.901     | 5.72 ± 0.15 | 0.285                 | 6.55 ± 0.14 | 5.070     | 5.30 ± 0.22 |
| A-228    | 0.183                 | 6.74 ± 0.02 | 3.331     | 5.48 ± 0.10 | 0.360                 | 6.44 ± 0.16 | 3.428     | 5.47 ± 0.16 |
| A-229    | 3.359                 | 5.47 ± 0.09 | 13.254    | 4.88 ± 0.09 | 4.169                 | 5.38 ± 0.17 | 14.791    | 4.83 ± 0.06 |
| A-230    | 1.700                 | 5.77 ± 0.04 | 11.869    | 4.93 ± 0.12 | 2.138                 | 5.67 ± 0.10 | 15.049    | 4.82 ± 0.07 |
| A-231    | 1.916                 | 5.72 ± 0.02 | 12.403    | 4.91 ± 0.08 | 2.754                 | 5.56 ± 0.10 | 15.668    | 4.81 ± 0.06 |
| A-232    | 1.139                 | 5.94 ± 0.02 | 10.163    | 4.99 ± 0.04 | 1.288                 | 5.89 ± 0.12 | 12.023    | 4.92 ± 0.08 |
| A-233    | 0.196                 | 6.71 ± 0.03 | 2.590     | 5.59 ± 0.16 | 0.398                 | 6.40 ± 0.09 | 3.369     | 5.47 ± 0.12 |
| A-234    | 8.226                 | 5.08 ± 0.03 | 17.671    | 4.75 ± 0.05 | 6.761                 | 5.17 ± 0.03 | 14.706    | 4.83 ± 0.05 |
| A-235    | 2.487                 | 5.60 ± 0.03 | 13.401    | 4.87 ± 0.09 | 4.233                 | 5.37 ± 0.14 | 14.234    | 4.85 ± 0.07 |
| A-236    | 0.124                 | 6.91 ± 0.05 | 2.349     | 5.63 ± 0.12 | 0.339                 | 6.47 ± 0.26 | 10.000    | 5.00 ± 0.05 |
| A-237    | 0.033                 | 7.48 ± 0.04 | 0.486     | 6.31 ± 0.29 | 0.137                 | 6.86 ± 0.10 | 2.188     | 5.66 ± 0.29 |
| A-238    | 0.667                 | 6.18 ± 0.21 | 0.533     | 6.27 ± 0.12 | 0.028                 | 7.56 ± 0.97 | 0.567     | 6.25 ± 0.44 |
| A-239    | 12.812                | 4.89 ± 0.01 | 19.517    | 4.71 ± 0.01 | 9.261                 | 5.03 ± 0.06 | 17.378    | 4.76 ± 0.06 |
| A-240    | 0.141                 | 6.85 ± 0.03 | 5.216     | 5.28 ± 0.10 | 0.713                 | 6.15 ± 0.22 | 4.898     | 5.31 ± 0.14 |
| A-241    | 0.049                 | 7.31 ± 0.05 | 1.296     | 5.89 ± 0.15 | 0.035                 | 7.45 ± 0.03 | 3.273     | 5.49 ± 0.06 |
| A-242    | 0.112                 | 6.95 ± 0.02 | 1.830     | 5.74 ± 0.13 | 0.161                 | 6.79 ± 0.07 | 5.129     | 5.29 ± 0.08 |
| A-243    | 0.057                 | 7.25 ± 0.06 | 1.385     | 5.86 ± 0.18 | 0.140                 | 6.85 ± 0.07 | 1.116     | 5.95 ± 0.15 |
| A-244    | 0.165                 | 6.78 ± 0.10 | 1.468     | 5.83 ± 0.28 | 0.617                 | 6.21 ± 0.40 | 2.997     | 5.52 ± 0.34 |
| A-245    | 0.902                 | 6.04 ± 0.03 | 9.944     | 5.00 ± 0.01 | 1.318                 | 5.88 ± 0.06 | 9.477     | 5.02 ± 0.02 |

**Table S7. Activity of 5-NI test compounds against *Giardia lamblia***

| Compound | <i>G. lamblia</i> 713 |             |           |             | <i>G. lamblia</i> 106 |             |           |             |
|----------|-----------------------|-------------|-----------|-------------|-----------------------|-------------|-----------|-------------|
|          | MzS                   |             | MzR       |             | MzS                   |             | MzR       |             |
|          | EC50 (μM)             | pEC50       | EC50 (μM) | pEC50       | EC50 (μM)             | pEC50       | EC50 (μM) | pEC50       |
| A-246    | 1.986                 | 5.70 ± 0.01 | 13.163    | 4.88 ± 0.09 | 2.399                 | 5.62 ± 0.03 | 7.630     | 5.12 ± 0.15 |
| A-247    | 0.352                 | 6.45 ± 0.02 | 13.906    | 4.86 ± 0.01 | 0.558                 | 6.25 ± 0.10 | 4.493     | 5.35 ± 0.08 |
| B-201    | 5.053                 | 5.30 ± 0.08 | 13.999    | 4.85 ± 0.05 | 5.799                 | 5.24 ± 0.11 | 14.289    | 4.85 ± 0.05 |
| B-202    | 0.352                 | 6.45 ± 0.15 | 1.892     | 5.72 ± 0.10 | 0.531                 | 6.28 ± 0.11 | 6.683     | 5.18 ± 0.08 |
| B-203    | 0.578                 | 6.24 ± 0.08 | 5.522     | 5.26 ± 0.08 | 0.671                 | 6.17 ± 0.06 | 7.718     | 5.11 ± 0.10 |
| B-204    | 0.345                 | 6.46 ± 0.11 | 3.961     | 5.40 ± 0.10 | 0.263                 | 6.58 ± 0.09 | 3.037     | 5.52 ± 0.11 |
| B-205    | 6.448                 | 5.19 ± 0.19 | 13.392    | 4.87 ± 0.09 | 8.318                 | 5.08 ± 0.14 | 11.482    | 4.94 ± 0.02 |
| B-206    | 1.963                 | 5.71 ± 0.02 | 4.242     | 5.37 ± 0.03 | 2.733                 | 5.56 ± 0.22 | 3.467     | 5.46 ± 0.20 |
| B-207    | 0.236                 | 6.63 ± 0.06 | 3.685     | 5.43 ± 0.09 | 0.307                 | 6.51 ± 0.04 | 3.415     | 5.47 ± 0.18 |
| B-208    | 0.346                 | 6.46 ± 0.17 | 2.094     | 5.68 ± 0.36 | 0.261                 | 6.58 ± 0.45 | 5.168     | 5.29 ± 0.16 |
| B-209    | 0.210                 | 6.68 ± 0.07 | 2.142     | 5.67 ± 0.31 | 4.713                 | 5.33 ± 0.15 | 10.839    | 4.97 ± 0.02 |
| B-210    | 0.844                 | 6.07 ± 0.04 | 9.606     | 5.02 ± 0.26 | 0.955                 | 6.02 ± 0.04 | 9.772     | 5.01 ± 0.12 |
| B-211    | 1.064                 | 5.97 ± 0.03 | 13.099    | 4.88 ± 0.17 | 1.935                 | 5.71 ± 0.06 | 10.000    | 5.00 ± 0.08 |
| B-212    | 3.625                 | 5.44 ± 0.01 | 10.972    | 4.96 ± 0.18 | 5.934                 | 5.23 ± 0.04 | 11.220    | 4.95 ± 0.01 |
| B-213    | 1.388                 | 5.86 ± 0.07 | 7.529     | 5.12 ± 0.15 | 1.935                 | 5.71 ± 0.07 | 5.799     | 5.24 ± 0.13 |
| B-214    | 1.834                 | 5.74 ± 0.04 | 7.552     | 5.12 ± 0.30 | 7.052                 | 5.15 ± 0.20 | 16.982    | 4.77 ± 0.04 |
| B-215    | 13.392                | 4.87 ± 0.09 | 9.396     | 5.03 ± 0.33 | 11.570                | 4.94 ± 0.09 | 12.303    | 4.91 ± 0.03 |
| B-216    | 9.190                 | 5.04 ± 0.08 | 10.699    | 4.97 ± 0.27 | 12.784                | 4.89 ± 0.08 | 14.344    | 4.84 ± 0.08 |
| B-217    | 0.860                 | 6.07 ± 0.08 | 3.538     | 5.45 ± 0.38 | 1.862                 | 5.73 ± 0.05 | 9.624     | 5.02 ± 0.21 |
| B-218    | 8.599                 | 5.07 ± 0.16 | 9.827     | 5.01 ± 0.20 | 6.358                 | 5.20 ± 0.13 | 13.490    | 4.87 ± 0.09 |
| B-219    | 0.278                 | 6.56 ± 0.08 | 2.001     | 5.70 ± 0.20 | 1.072                 | 5.97 ± 0.01 | 4.823     | 5.32 ± 0.10 |
| B-220    | 0.101                 | 6.99 ± 0.13 | 0.999     | 6.00 ± 0.20 | 0.533                 | 6.27 ± 0.08 | 5.710     | 5.24 ± 0.12 |
| B-221    | 2.622                 | 5.58 ± 0.05 | 7.535     | 5.12 ± 0.13 | 3.415                 | 5.47 ± 0.12 | 8.511     | 5.07 ± 0.02 |
| B-222    | 1.806                 | 5.74 ± 0.08 | 7.820     | 5.11 ± 0.17 | 4.606                 | 5.34 ± 0.10 | 11.749    | 4.93 ± 0.08 |
| B-223    | 1.621                 | 5.79 ± 0.03 | 6.456     | 5.19 ± 0.13 | 2.455                 | 5.61 ± 0.09 | 10.233    | 4.99 ± 0.06 |
| B-224    | 0.247                 | 6.61 ± 0.04 | 2.808     | 5.55 ± 0.08 | 0.440                 | 6.36 ± 0.11 | 2.026     | 5.69 ± 0.17 |
| B-225    | 0.099                 | 7.01 ± 0.09 | 3.688     | 5.43 ± 0.12 | 0.185                 | 6.73 ± 0.17 | 0.933     | 6.03 ± 0.18 |
| B-226    | 0.291                 | 6.54 ± 0.09 | 3.961     | 5.40 ± 0.05 | 0.636                 | 6.20 ± 0.10 | 2.436     | 5.61 ± 0.11 |
| B-227    | 0.285                 | 6.55 ± 0.16 | 2.520     | 5.60 ± 0.03 | 0.681                 | 6.17 ± 0.05 | 2.326     | 5.63 ± 0.12 |
| B-228    | 0.322                 | 6.49 ± 0.09 | 4.834     | 5.32 ± 0.05 | 0.832                 | 6.08 ± 0.06 | 2.754     | 5.56 ± 0.11 |
| B-229    | 1.081                 | 5.97 ± 0.06 | 5.901     | 5.23 ± 0.13 | 1.660                 | 5.78 ± 0.11 | 5.248     | 5.28 ± 0.16 |
| B-230    | 1.993                 | 5.70 ± 0.24 | 5.522     | 5.26 ± 0.12 | 1.031                 | 5.99 ± 0.10 | 4.332     | 5.36 ± 0.10 |
| B-231    | 5.984                 | 5.22 ± 0.05 | 7.045     | 5.15 ± 0.16 | 4.974                 | 5.30 ± 0.08 | 11.749    | 4.93 ± 0.06 |
| B-232    | 0.841                 | 6.08 ± 0.03 | 4.686     | 5.33 ± 0.08 | 1.308                 | 5.88 ± 0.09 | 4.823     | 5.32 ± 0.12 |
| B-233    | 0.207                 | 6.69 ± 0.06 | 3.313     | 5.48 ± 0.07 | 0.450                 | 6.35 ± 0.04 | 1.402     | 5.85 ± 0.17 |
| B-234    | 6.448                 | 5.19 ± 0.07 | 14.313    | 4.84 ± 0.09 | 6.658                 | 5.18 ± 0.14 | 13.594    | 4.87 ± 0.08 |
| B-235    | 1.681                 | 5.77 ± 0.07 | 10.976    | 4.96 ± 0.07 | 1.457                 | 5.84 ± 0.08 | 7.762     | 5.11 ± 0.13 |
| B-236    | 0.310                 | 6.51 ± 0.09 | 1.913     | 5.72 ± 0.28 | 0.676                 | 6.17 ± 0.05 | 2.493     | 5.60 ± 0.15 |
| B-237    | 0.113                 | 6.95 ± 0.09 | 0.659     | 6.18 ± 0.38 | 0.404                 | 6.39 ± 0.04 | 2.273     | 5.64 ± 0.38 |
| B-238    | 3.574                 | 5.45 ± 0.16 | 10.266    | 4.99 ± 0.00 | 5.799                 | 5.24 ± 0.14 | 14.566    | 4.84 ± 0.07 |
| B-239    | 15.296                | 4.82 ± 0.09 | 11.988    | 4.92 ± 0.05 | 7.413                 | 5.13 ± 0.14 | 16.853    | 4.77 ± 0.07 |
| B-240    | 0.938                 | 6.03 ± 0.08 | 10.041    | 5.00 ± 0.03 | 2.556                 | 5.59 ± 0.23 | 11.134    | 4.95 ± 0.05 |
| B-241    | 0.050                 | 7.30 ± 0.12 | 0.646     | 6.19 ± 0.09 | 0.291                 | 6.54 ± 0.41 | 2.862     | 5.54 ± 0.31 |
| B-242    | 0.066                 | 7.18 ± 0.09 | 1.728     | 5.76 ± 0.10 | 0.105                 | 6.98 ± 0.21 | 1.613     | 5.79 ± 0.38 |
| B-243    | 0.101                 | 7.00 ± 0.21 | 2.305     | 5.64 ± 0.19 | 0.238                 | 6.62 ± 0.19 | 1.783     | 5.75 ± 0.25 |
| B-244    | 0.110                 | 6.96 ± 0.05 | 1.580     | 5.80 ± 0.23 | 0.170                 | 6.76 ± 0.14 | 0.540     | 6.26 ± 0.14 |
| B-245    | 0.442                 | 6.35 ± 0.05 | 6.472     | 5.19 ± 0.08 | 0.759                 | 6.12 ± 0.15 | 6.839     | 5.17 ± 0.16 |

**Table S7. Activity of 5-NI test compounds against *Giardia lamblia***

| Compound | <i>G. lamblia</i> 713 |             |           |             | <i>G. lamblia</i> 106 |             |           |             |
|----------|-----------------------|-------------|-----------|-------------|-----------------------|-------------|-----------|-------------|
|          | MzS                   |             | MzR       |             | MzS                   |             | MzR       |             |
|          | EC50 (μM)             | pEC50       | EC50 (μM) | pEC50       | EC50 (μM)             | pEC50       | EC50 (μM) | pEC50       |
| B-246    | 0.878                 | 6.06 ± 0.03 | 9.396     | 5.03 ± 0.05 | 0.944                 | 6.03 ± 0.17 | 7.630     | 5.12 ± 0.18 |
| B-247    | 0.177                 | 6.75 ± 0.03 | 2.924     | 5.53 ± 0.06 | 0.339                 | 6.47 ± 0.16 | 3.126     | 5.51 ± 0.28 |
| C-201    | 1.257                 | 5.90 ± 0.15 | 12.812    | 4.89 ± 0.07 | 2.291                 | 5.64 ± 0.04 | 14.191    | 4.85 ± 0.06 |
| C-202    | 0.180                 | 6.74 ± 0.06 | 1.497     | 5.82 ± 0.03 | 0.161                 | 6.79 ± 0.14 | 2.793     | 5.55 ± 0.27 |
| C-203    | 0.486                 | 6.31 ± 0.05 | 3.930     | 5.41 ± 0.09 | 0.851                 | 6.07 ± 0.03 | 10.046    | 5.00 ± 0.12 |
| C-204    | > 20                  | < 4.70      | > 20      | < 4.70      | 0.329                 | 6.48 ± 0.06 | 4.385     | 5.36 ± 0.19 |
| C-205    | 3.226                 | 5.49 ± 0.05 | 13.692    | 4.86 ± 0.06 | 3.575                 | 5.45 ± 0.11 | 11.570    | 4.94 ± 0.03 |
| C-206    | 1.838                 | 5.74 ± 0.05 | 7.529     | 5.12 ± 0.05 | 1.660                 | 5.78 ± 0.15 | 10.312    | 4.99 ± 0.02 |
| C-207    | 0.366                 | 6.44 ± 0.04 | 5.487     | 5.26 ± 0.14 | 0.486                 | 6.31 ± 0.11 | 3.162     | 5.50 ± 0.11 |
| C-208    | 0.439                 | 6.36 ± 0.13 | 7.045     | 5.15 ± 0.18 | 2.326                 | 5.63 ± 0.14 | 11.307    | 4.95 ± 0.03 |
| C-209    | 0.212                 | 6.67 ± 0.08 | 3.109     | 5.51 ± 0.08 | 1.965                 | 5.71 ± 0.13 | 9.848     | 5.01 ± 0.06 |
| C-210    | 0.544                 | 6.26 ± 0.06 | 6.891     | 5.16 ± 0.10 | 1.175                 | 5.93 ± 0.07 | 7.762     | 5.11 ± 0.07 |
| C-211    | 0.831                 | 6.08 ± 0.05 | 8.989     | 5.05 ± 0.06 | 2.291                 | 5.64 ± 0.10 | 10.391    | 4.98 ± 0.05 |
| C-212    | 2.917                 | 5.54 ± 0.02 | 10.164    | 4.99 ± 0.06 | 3.415                 | 5.47 ± 0.10 | 9.333     | 5.03 ± 0.15 |
| C-213    | 2.044                 | 5.69 ± 0.02 | 11.988    | 4.92 ± 0.03 | 1.920                 | 5.72 ± 0.02 | 10.391    | 4.98 ± 0.02 |
| C-214    | 1.181                 | 5.93 ± 0.04 | 7.727     | 5.11 ± 0.03 | 1.765                 | 5.75 ± 0.05 | 12.092    | 4.92 ± 0.07 |
| C-215    | 3.696                 | 5.43 ± 0.05 | 7.203     | 5.14 ± 0.21 | 4.571                 | 5.34 ± 0.13 | 11.839    | 4.93 ± 0.02 |
| C-216    | 3.297                 | 5.48 ± 0.07 | 9.035     | 5.04 ± 0.06 | 4.169                 | 5.38 ± 0.04 | 11.659    | 4.93 ± 0.03 |
| C-217    | 2.209                 | 5.66 ± 0.03 | 6.322     | 5.20 ± 0.15 | 1.792                 | 5.75 ± 0.07 | 12.686    | 4.90 ± 0.04 |
| C-218    | 3.961                 | 5.40 ± 0.09 | 11.469    | 4.94 ± 0.14 | 3.773                 | 5.42 ± 0.18 | 12.957    | 4.89 ± 0.06 |
| C-219    | 0.357                 | 6.45 ± 0.03 | 4.029     | 5.39 ± 0.11 | 0.380                 | 6.42 ± 0.04 | 5.689     | 5.25 ± 0.08 |
| C-220    | 0.075                 | 7.13 ± 0.07 | 0.996     | 6.00 ± 0.17 | 0.098                 | 7.01 ± 0.13 | 2.929     | 5.53 ± 0.25 |
| C-221    | 2.733                 | 5.56 ± 0.04 | 13.099    | 4.88 ± 0.09 | 2.309                 | 5.64 ± 0.10 | 11.220    | 4.95 ± 0.02 |
| C-222    | 0.436                 | 6.36 ± 0.04 | 10.273    | 4.99 ± 0.14 | 0.347                 | 6.46 ± 0.14 | 4.332     | 5.36 ± 0.08 |
| C-223    | 1.676                 | 5.78 ± 0.09 | 8.989     | 5.05 ± 0.21 | 2.436                 | 5.61 ± 0.07 | 14.566    | 4.84 ± 0.08 |
| C-224    | 0.136                 | 6.87 ± 0.05 | 12.812    | 4.89 ± 0.10 | 0.776                 | 6.11 ± 0.01 | 9.441     | 5.03 ± 0.13 |
| C-225    | 2.546                 | 5.59 ± 0.07 | 8.226     | 5.08 ± 0.19 | 0.412                 | 6.39 ± 0.00 | 7.328     | 5.14 ± 0.20 |
| C-226    | 0.067                 | 7.18 ± 0.02 | 8.046     | 5.09 ± 0.20 | 0.519                 | 6.29 ± 0.09 | 4.241     | 5.37 ± 0.24 |
| C-227    | 0.039                 | 7.40 ± 0.07 | 6.891     | 5.16 ± 0.06 | 1.647                 | 5.78 ± 0.54 | 7.630     | 5.12 ± 0.18 |
| C-228    | 0.449                 | 6.35 ± 0.20 | 12.257    | 4.91 ± 0.11 | 1.765                 | 5.75 ± 0.53 | 5.991     | 5.22 ± 0.20 |
| C-229    | 0.256                 | 6.59 ± 0.04 | 12.812    | 4.89 ± 0.10 | 4.137                 | 5.38 ± 0.34 | 9.550     | 5.02 ± 0.12 |
| C-230    | 0.139                 | 6.86 ± 0.17 | 8.037     | 5.09 ± 0.16 | 3.773                 | 5.42 ± 0.36 | 9.016     | 5.05 ± 0.12 |
| C-231    | 0.251                 | 6.60 ± 0.18 | 5.884     | 5.23 ± 0.31 | 4.898                 | 5.31 ± 0.31 | 7.079     | 5.15 ± 0.24 |
| C-232    | 1.053                 | 5.98 ± 0.26 | 9.453     | 5.02 ± 0.05 | 4.105                 | 5.39 ± 0.34 | 7.718     | 5.11 ± 0.17 |
| C-233    | 0.178                 | 6.75 ± 0.06 | 6.485     | 5.19 ± 0.21 | 1.090                 | 5.96 ± 0.42 | 6.109     | 5.21 ± 0.11 |
| C-234    | 0.142                 | 6.85 ± 0.01 | 6.839     | 5.17 ± 0.26 | 2.138                 | 5.67 ± 0.09 | 12.764    | 4.89 ± 0.05 |
| C-235    | 0.081                 | 7.09 ± 0.10 | 5.772     | 5.24 ± 0.29 | 1.107                 | 5.96 ± 0.08 | 12.417    | 4.91 ± 0.09 |
| C-236    | 0.264                 | 6.58 ± 0.08 | 6.741     | 5.17 ± 0.15 | 0.583                 | 6.23 ± 0.02 | 5.572     | 5.25 ± 0.08 |
| C-237    | 1.208                 | 5.92 ± 0.09 | 4.682     | 5.33 ± 0.18 | 0.191                 | 6.72 ± 0.09 | 3.020     | 5.52 ± 0.21 |
| C-238    | 1.744                 | 5.76 ± 0.08 | 11.469    | 4.94 ± 0.04 | 2.205                 | 5.66 ± 0.06 | 10.391    | 4.98 ± 0.02 |
| C-239    | 3.990                 | 5.40 ± 0.06 | 14.960    | 4.83 ± 0.06 | 3.388                 | 5.47 ± 0.12 | 13.490    | 4.87 ± 0.09 |
| C-240    | 1.220                 | 5.91 ± 0.10 | 7.189     | 5.14 ± 0.09 | 0.961                 | 6.02 ± 0.12 | 4.898     | 5.31 ± 0.05 |
| C-241    | 0.455                 | 6.34 ± 0.40 | 5.632     | 5.25 ± 0.15 | 0.087                 | 7.06 ± 0.24 | 0.730     | 6.14 ± 0.34 |
| C-242    | 3.162                 | 5.50 ± 0.03 | 9.396     | 5.03 ± 0.11 | 0.094                 | 7.03 ± 0.06 | 2.222     | 5.65 ± 0.27 |
| C-243    | 1.533                 | 5.81 ± 0.09 | 5.030     | 5.30 ± 0.23 | 0.098                 | 7.01 ± 0.10 | 1.298     | 5.89 ± 0.15 |
| C-244    | 0.443                 | 6.35 ± 0.01 | 4.642     | 5.33 ± 0.03 | 0.214                 | 6.67 ± 0.10 | 6.709     | 5.17 ± 0.22 |
| C-245    | 1.983                 | 5.70 ± 0.11 | 11.469    | 4.94 ± 0.08 | 0.713                 | 6.15 ± 0.03 | 5.580     | 5.25 ± 0.15 |

**Table S7. Activity of 5-NI test compounds against *Giardia lamblia***

| Compound | <i>G. lamblia</i> 713 |             |           |             | <i>G. lamblia</i> 106 |             |           |             |
|----------|-----------------------|-------------|-----------|-------------|-----------------------|-------------|-----------|-------------|
|          | MzS                   |             | MzR       |             | MzS                   |             | MzR       |             |
|          | EC50 (μM)             | pEC50       | EC50 (μM) | pEC50       | EC50 (μM)             | pEC50       | EC50 (μM) | pEC50       |
| C-246    | 0.540                 | 6.27 ± 0.17 | 6.448     | 5.19 ± 0.14 | 2.358                 | 5.63 ± 0.31 | 7.278     | 5.14 ± 0.23 |
| C-247    | 3.549                 | 5.45 ± 0.12 | 11.217    | 4.95 ± 0.07 | 0.556                 | 6.26 ± 0.18 | 8.954     | 5.05 ± 0.20 |
| D-201    | 17.769                | 4.75 ± 0.05 | 13.117    | 4.88 ± 0.09 | 10.881                | 4.96 ± 0.15 | 11.682    | 4.93 ± 0.03 |
| D-202    | 1.750                 | 5.76 ± 0.12 | 12.008    | 4.92 ± 0.12 | 5.453                 | 5.26 ± 0.04 | 10.715    | 4.97 ± 0.03 |
| D-203    | 15.689                | 4.80 ± 0.04 | 16.000    | 4.80 ± 0.05 | 10.233                | 4.99 ± 0.10 | 17.920    | 4.75 ± 0.05 |
| D-204    | 12.482                | 4.90 ± 0.11 | 15.651    | 4.81 ± 0.06 | 7.356                 | 5.13 ± 0.15 | 11.931    | 4.92 ± 0.02 |
| D-205    | 14.328                | 4.84 ± 0.07 | 12.413    | 4.91 ± 0.10 | 10.174                | 4.99 ± 0.13 | 11.954    | 4.92 ± 0.02 |
| D-206    | 9.620                 | 5.02 ± 0.03 | 13.861    | 4.86 ± 0.08 | 11.156                | 4.95 ± 0.09 | 15.488    | 4.81 ± 0.06 |
| D-207    | 8.148                 | 5.09 ± 0.09 | 12.831    | 4.89 ± 0.10 | 10.000                | 5.00 ± 0.04 | 14.678    | 4.83 ± 0.07 |
| D-208    | 5.474                 | 5.26 ± 0.15 | 11.641    | 4.93 ± 0.12 | 9.829                 | 5.01 ± 0.03 | > 20      | < 4.70      |
| D-209    | 4.596                 | 5.34 ± 0.15 | 12.551    | 4.90 ± 0.10 | 11.416                | 4.94 ± 0.06 | 16.982    | 4.77 ± 0.03 |
| D-210    | 14.803                | 4.83 ± 0.06 | > 20      | < 4.70      | 7.189                 | 5.14 ± 0.31 | 16.218    | 4.79 ± 0.05 |
| D-211    | 14.482                | 4.84 ± 0.06 | 15.233    | 4.82 ± 0.07 | 12.209                | 4.91 ± 0.11 | 14.791    | 4.83 ± 0.06 |
| D-212    | 12.405                | 4.91 ± 0.03 | 13.747    | 4.86 ± 0.06 | 10.155                | 4.99 ± 0.18 | 12.303    | 4.91 ± 0.03 |
| D-213    | 14.804                | 4.83 ± 0.07 | 18.986    | 4.72 ± 0.02 | 11.749                | 4.93 ± 0.13 | 12.809    | 4.89 ± 0.04 |
| D-215    | 13.117                | 4.88 ± 0.09 | > 20      | < 4.70      | 8.577                 | 5.07 ± 0.21 | 9.441     | 5.03 ± 0.04 |
| D-216    | 13.410                | 4.87 ± 0.09 | > 20      | < 4.70      | 9.050                 | 5.04 ± 0.22 | 8.810     | 5.06 ± 0.07 |
| D-217    | 5.982                 | 5.22 ± 0.05 | > 20      | < 4.70      | 9.261                 | 5.03 ± 0.21 | 10.715    | 4.97 ± 0.08 |
| D-218    | 13.861                | 4.86 ± 0.08 | 16.539    | 4.78 ± 0.08 | 9.550                 | 5.02 ± 0.21 | 9.698     | 5.01 ± 0.04 |
| D-219    | 8.190                 | 5.09 ± 0.16 | 16.178    | 4.79 ± 0.09 | 9.441                 | 5.03 ± 0.05 | 13.107    | 4.88 ± 0.04 |
| D-220    | 2.883                 | 5.54 ± 0.40 | 16.218    | 4.79 ± 0.09 | 6.958                 | 5.16 ± 0.30 | 9.716     | 5.01 ± 0.12 |
| D-221    | 12.827                | 4.89 ± 0.04 | 14.810    | 4.83 ± 0.07 | 6.346                 | 5.20 ± 0.20 | 10.654    | 4.97 ± 0.11 |
| D-222    | 19.303                | 4.71 ± 0.01 | > 20      | < 4.70      | 14.791                | 4.83 ± 0.08 | 14.706    | 4.83 ± 0.06 |
| D-223    | > 20                  | < 4.70      | > 20      | < 4.70      | 16.032                | 4.80 ± 0.07 | 18.478    | 4.73 ± 0.03 |
| D-224    | 10.987                | 4.96 ± 0.02 | 17.477    | 4.76 ± 0.06 | 8.175                 | 5.09 ± 0.09 | 11.614    | 4.94 ± 0.08 |
| D-225    | 4.402                 | 5.36 ± 0.06 | 16.539    | 4.78 ± 0.05 | 3.236                 | 5.49 ± 0.27 | 10.715    | 4.97 ± 0.01 |
| D-226    | 8.151                 | 5.09 ± 0.05 | 16.178    | 4.79 ± 0.06 | 10.798                | 4.97 ± 0.03 | 6.683     | 5.18 ± 0.20 |
| D-227    | 10.987                | 4.96 ± 0.02 | 17.477    | 4.76 ± 0.06 | 6.556                 | 5.18 ± 0.30 | 8.810     | 5.06 ± 0.08 |
| D-228    | 8.906                 | 5.05 ± 0.02 | 17.096    | 4.77 ± 0.07 | 8.777                 | 5.06 ± 0.03 | 12.445    | 4.91 ± 0.04 |
| D-229    | 16.178                | 4.79 ± 0.05 | 17.477    | 4.76 ± 0.06 | 10.155                | 4.99 ± 0.19 | 10.881    | 4.96 ± 0.03 |
| D-230    | 12.544                | 4.90 ± 0.02 | 16.722    | 4.78 ± 0.08 | 13.284                | 4.88 ± 0.09 | 10.881    | 4.96 ± 0.00 |
| D-231    | 13.109                | 4.88 ± 0.07 | 16.908    | 4.77 ± 0.07 | 13.082                | 4.88 ± 0.09 | 11.394    | 4.94 ± 0.04 |
| D-232    | 12.969                | 4.89 ± 0.04 | 16.908    | 4.77 ± 0.07 | 13.698                | 4.86 ± 0.10 | 13.284    | 4.88 ± 0.09 |
| D-233    | 8.903                 | 5.05 ± 0.06 | 18.066    | 4.74 ± 0.04 | 9.333                 | 5.03 ± 0.06 | 13.594    | 4.87 ± 0.08 |
| D-234    | 11.166                | 4.95 ± 0.01 | 17.477    | 4.76 ± 0.06 | 12.303                | 4.91 ± 0.13 | 10.312    | 4.99 ± 0.02 |
| D-235    | 11.543                | 4.94 ± 0.01 | 15.651    | 4.81 ± 0.07 | 9.550                 | 5.02 ± 0.11 | 12.023    | 4.92 ± 0.11 |
| D-236    | 8.705                 | 5.06 ± 0.07 | 16.722    | 4.78 ± 0.08 | 3.744                 | 5.43 ± 0.14 | 4.043     | 5.39 ± 0.30 |
| D-237    | 2.068                 | 5.68 ± 0.05 | 14.171    | 4.85 ± 0.10 | 3.211                 | 5.49 ± 0.12 | 10.965    | 4.96 ± 0.09 |
| D-238    | 14.810                | 4.83 ± 0.13 | 18.266    | 4.74 ± 0.04 | 7.244                 | 5.14 ± 0.13 | 13.082    | 4.88 ± 0.09 |
| D-239    | 16.357                | 4.79 ± 0.09 | 17.285    | 4.76 ± 0.06 | 7.943                 | 5.10 ± 0.13 | 12.115    | 4.92 ± 0.05 |
| D-240    | 2.095                 | 5.68 ± 0.15 | 16.539    | 4.78 ± 0.05 | 2.951                 | 5.53 ± 0.03 | 12.256    | 4.91 ± 0.07 |
| D-241    | 0.696                 | 6.16 ± 0.31 | 12.690    | 4.90 ± 0.04 | 2.205                 | 5.66 ± 0.35 | 11.526    | 4.94 ± 0.12 |
| D-242    | 4.019                 | 5.40 ± 0.02 | > 20      | < 4.70      | 3.744                 | 5.43 ± 0.12 | 11.482    | 4.94 ± 0.05 |
| D-243    | 3.756                 | 5.43 ± 0.03 | 19.734    | 4.70 ± 0.00 | 3.575                 | 5.45 ± 0.04 | 11.220    | 4.95 ± 0.05 |
| D-244    | 8.065                 | 5.09 ± 0.08 | 19.303    | 4.71 ± 0.01 | 6.658                 | 5.18 ± 0.16 | 11.570    | 4.94 ± 0.05 |
| D-245    | 10.167                | 4.99 ± 0.03 | > 20      | < 4.70      | 7.300                 | 5.14 ± 0.19 | 7.762     | 5.11 ± 0.08 |
| D-246    | 8.804                 | 5.06 ± 0.08 | 17.477    | 4.76 ± 0.06 | 7.413                 | 5.13 ± 0.17 | 7.943     | 5.10 ± 0.13 |

**Table S7. Activity of 5-NI test compounds against *Giardia lamblia***

| Compound | <i>G. lamblia</i> 713 |             |           |             | <i>G. lamblia</i> 106 |             |           |             |
|----------|-----------------------|-------------|-----------|-------------|-----------------------|-------------|-----------|-------------|
|          | MzS                   |             | MzR       |             | MzS                   |             | MzR       |             |
|          | EC50 (μM)             | pEC50       | EC50 (μM) | pEC50       | EC50 (μM)             | pEC50       | EC50 (μM) | pEC50       |
| D-247    | 3.519                 | 5.45 ± 0.04 | 15.141    | 4.82 ± 0.06 | 8.382                 | 5.08 ± 0.05 | 11.482    | 4.94 ± 0.10 |
| E-201    | 0.103                 | 6.99 ± 0.03 | 1.862     | 5.73 ± 0.10 | 0.118                 | 6.93 ± 0.03 | 2.154     | 5.67 ± 0.09 |
| E-202    | 0.039                 | 7.41 ± 0.27 | 0.596     | 6.22 ± 0.09 | 0.034                 | 7.47 ± 0.12 | 0.182     | 6.74 ± 0.13 |
| E-203    | 0.011                 | 7.97 ± 0.19 | 0.241     | 6.62 ± 0.12 | 0.040                 | 7.39 ± 0.16 | 0.201     | 6.70 ± 0.16 |
| E-204    | 0.023                 | 7.63 ± 0.15 | 0.728     | 6.14 ± 0.10 | 0.023                 | 7.64 ± 0.19 | 0.316     | 6.50 ± 0.09 |
| E-205    | 0.075                 | 7.12 ± 0.17 | 1.639     | 5.79 ± 0.16 | 0.263                 | 6.58 ± 0.06 | 3.126     | 5.51 ± 0.43 |
| E-206    | 0.165                 | 6.78 ± 0.28 | 1.479     | 5.83 ± 0.13 | 0.165                 | 6.78 ± 0.32 | 2.884     | 5.54 ± 0.13 |
| E-207    | 0.019                 | 7.73 ± 0.29 | 0.334     | 6.48 ± 0.06 | 0.047                 | 7.33 ± 0.10 | 0.468     | 6.33 ± 0.14 |
| E-208    | 0.016                 | 7.81 ± 0.30 | 0.453     | 6.34 ± 0.10 | 0.272                 | 6.57 ± 0.19 | 0.940     | 6.03 ± 0.25 |
| E-209    | 0.358                 | 6.45 ± 0.15 | 6.077     | 5.22 ± 0.27 | 1.028                 | 5.99 ± 0.13 | 8.446     | 5.07 ± 0.12 |
| E-210    | 0.006                 | 8.22 ± 0.09 | 0.188     | 6.73 ± 0.14 | 0.054                 | 7.27 ± 0.06 | 0.231     | 6.64 ± 0.12 |
| E-211    | 0.043                 | 7.37 ± 0.22 | 1.288     | 5.89 ± 0.06 | 0.363                 | 6.44 ± 0.07 | 2.906     | 5.54 ± 0.16 |
| E-212    | 0.161                 | 6.79 ± 0.13 | 2.309     | 5.64 ± 0.25 | 0.449                 | 6.35 ± 0.11 | 1.660     | 5.78 ± 0.16 |
| E-213    | 0.014                 | 7.87 ± 0.06 | 0.293     | 6.53 ± 0.04 | 0.073                 | 7.13 ± 0.05 | 0.475     | 6.32 ± 0.10 |
| E-214    | 0.042                 | 7.38 ± 0.08 | 0.215     | 6.67 ± 0.10 | 0.257                 | 6.59 ± 0.12 | 1.047     | 5.98 ± 0.16 |
| E-215    | 0.039                 | 7.41 ± 0.50 | 6.166     | 5.21 ± 0.00 | 0.412                 | 6.39 ± 0.05 | 3.687     | 5.43 ± 0.10 |
| E-216    | 0.209                 | 6.68 ± 0.17 | 1.047     | 5.98 ± 0.00 | 0.100                 | 7.00 ± 0.17 | 2.362     | 5.63 ± 0.09 |
| E-217    | 0.156                 | 6.81 ± 0.34 | 0.240     | 6.62 ± 0.00 | 0.229                 | 6.64 ± 0.42 | 0.336     | 6.47 ± 0.29 |
| E-218    | 1.684                 | 5.77 ± 0.02 | 5.204     | 5.28 ± 0.16 | 1.916                 | 5.72 ± 0.07 | 9.120     | 5.04 ± 0.04 |
| E-219    | 0.014                 | 7.84 ± 0.19 | 0.801     | 6.10 ± 0.34 | 0.037                 | 7.44 ± 0.03 | 0.203     | 6.69 ± 0.24 |
| E-220    | 0.016                 | 7.80 ± 0.24 | 1.008     | 6.00 ± 0.46 | 0.086                 | 7.07 ± 0.38 | 0.203     | 6.69 ± 0.61 |
| E-221    | 0.044                 | 7.36 ± 0.08 | 0.453     | 6.34 ± 0.24 | 0.147                 | 6.83 ± 0.18 | 0.427     | 6.37 ± 0.12 |
| E-222    | 0.008                 | 8.09 ± 0.06 | 0.179     | 6.75 ± 0.29 | 0.045                 | 7.35 ± 0.12 | 0.804     | 6.10 ± 0.22 |
| E-223    | 0.020                 | 7.69 ± 0.31 | 0.302     | 6.52 ± 0.19 | 0.123                 | 6.91 ± 0.14 | 0.272     | 6.57 ± 0.11 |
| E-224    | 0.010                 | 7.99 ± 0.10 | 0.576     | 6.24 ± 0.21 | 0.023                 | 7.64 ± 0.16 | 0.550     | 6.26 ± 0.25 |
| E-225    | 0.012                 | 7.92 ± 0.09 | 0.186     | 6.73 ± 0.48 | 0.066                 | 7.18 ± 0.26 | 0.507     | 6.30 ± 0.71 |
| E-226    | 0.008                 | 8.08 ± 0.03 | 0.397     | 6.40 ± 0.25 | 0.026                 | 7.58 ± 0.16 | 1.035     | 5.99 ± 0.35 |
| E-227    | 0.026                 | 7.59 ± 0.08 | 0.437     | 6.36 ± 0.57 | 0.053                 | 7.27 ± 0.11 | 1.380     | 5.86 ± 0.35 |
| E-228    | 0.011                 | 7.96 ± 0.26 | 0.118     | 6.93 ± 0.26 | 0.046                 | 7.34 ± 0.27 | 0.238     | 6.62 ± 0.53 |
| E-229    | 0.021                 | 7.67 ± 0.22 | 0.261     | 6.58 ± 0.15 | 0.056                 | 7.26 ± 0.12 | 0.309     | 6.51 ± 0.19 |
| E-230    | 0.005                 | 8.31 ± 0.07 | 0.227     | 6.64 ± 0.16 | 0.028                 | 7.56 ± 0.16 | 0.195     | 6.71 ± 0.25 |
| E-231    | 0.036                 | 7.44 ± 0.05 | 0.610     | 6.21 ± 0.10 | 0.169                 | 6.77 ± 0.13 | 1.148     | 5.94 ± 0.52 |
| E-232    | 0.010                 | 8.02 ± 0.09 | 0.151     | 6.82 ± 0.21 | 0.028                 | 7.56 ± 0.06 | 0.224     | 6.65 ± 0.03 |
| E-233    | 0.123                 | 6.91 ± 0.10 | 1.482     | 5.83 ± 0.31 | 0.510                 | 6.29 ± 0.23 | 8.128     | 5.09 ± 0.05 |
| E-234    | 0.049                 | 7.31 ± 0.06 | 0.764     | 6.12 ± 0.27 | 0.170                 | 6.77 ± 0.11 | 0.933     | 6.03 ± 0.08 |
| E-235    | 0.018                 | 7.74 ± 0.12 | 0.282     | 6.55 ± 0.11 | 0.104                 | 6.98 ± 0.24 | 0.764     | 6.12 ± 0.03 |
| E-236    | 0.009                 | 8.04 ± 0.04 | 0.238     | 6.62 ± 0.13 | 0.034                 | 7.47 ± 0.01 | 0.314     | 6.50 ± 0.04 |
| E-237    | 0.019                 | 7.71 ± 0.25 | 0.055     | 7.26 ± 0.09 | 0.084                 | 7.08 ± 0.12 | 0.970     | 6.01 ± 0.06 |
| E-238    | 0.012                 | 7.91 ± 0.32 | 0.122     | 6.91 ± 0.37 | 0.045                 | 7.35 ± 0.16 | 0.236     | 6.63 ± 0.27 |
| E-239    | 0.284                 | 6.55 ± 0.05 | 1.479     | 5.83 ± 0.21 | 0.631                 | 6.20 ± 0.08 | 6.506     | 5.19 ± 0.13 |
| E-240    | 0.013                 | 7.90 ± 0.14 | 0.464     | 6.33 ± 0.06 | 0.142                 | 6.85 ± 0.28 | 0.510     | 6.29 ± 0.29 |
| E-241    | 0.020                 | 7.71 ± 0.08 | 0.439     | 6.36 ± 0.11 | 0.102                 | 6.99 ± 0.21 | 1.148     | 5.94 ± 0.31 |
| E-242    | 0.013                 | 7.88 ± 0.06 | 1.205     | 5.92 ± 0.09 | 0.031                 | 7.51 ± 0.10 | 0.884     | 6.05 ± 0.23 |
| E-243    | 0.034                 | 7.47 ± 0.06 | 1.700     | 5.77 ± 0.15 | 0.080                 | 7.10 ± 0.25 | 1.080     | 5.97 ± 0.16 |
| E-244    | 0.025                 | 7.61 ± 0.12 | 0.553     | 6.26 ± 0.16 | 0.071                 | 7.15 ± 0.08 | 3.603     | 5.44 ± 0.29 |
| E-245    | 0.003                 | 8.59 ± 0.21 | 0.157     | 6.80 ± 0.11 | 0.083                 | 7.08 ± 0.23 | 0.118     | 6.93 ± 0.20 |
| E-246    | 0.003                 | 8.52 ± 0.11 | 0.122     | 6.91 ± 0.25 | 0.033                 | 7.48 ± 0.11 | 0.265     | 6.58 ± 0.20 |

**Table S7. Activity of 5-NI test compounds against *Giardia lamblia***

| Compound | <i>G. lamblia</i> 713 |             |           |             | <i>G. lamblia</i> 106 |             |           |             |
|----------|-----------------------|-------------|-----------|-------------|-----------------------|-------------|-----------|-------------|
|          | MzS                   |             | MzR       |             | MzS                   |             | MzR       |             |
|          | EC50 (μM)             | pEC50       | EC50 (μM) | pEC50       | EC50 (μM)             | pEC50       | EC50 (μM) | pEC50       |
| E-247    | 0.005                 | 8.29 ± 0.29 | 0.261     | 6.58 ± 0.08 | 0.040                 | 7.40 ± 0.22 | 0.562     | 6.25 ± 0.29 |
| F-201    | 0.788                 | 6.10 ± 0.04 | 3.586     | 5.45 ± 0.16 | 2.291                 | 5.64 ± 0.07 | 10.715    | 4.97 ± 0.02 |
| F-202    | 0.088                 | 7.06 ± 0.29 | 0.874     | 6.06 ± 0.15 | 0.269                 | 6.57 ± 0.08 | 1.096     | 5.96 ± 0.09 |
| F-203    | 0.343                 | 6.47 ± 0.33 | 4.633     | 5.33 ± 0.18 | 0.859                 | 6.07 ± 0.11 | 4.145     | 5.38 ± 0.08 |
| F-204    | 0.148                 | 6.83 ± 0.19 | 1.553     | 5.81 ± 0.13 | 0.369                 | 6.43 ± 0.06 | 1.995     | 5.70 ± 0.10 |
| F-205    | 1.975                 | 5.70 ± 0.37 | 3.112     | 5.51 ± 0.12 | 1.549                 | 5.81 ± 0.04 | 6.879     | 5.16 ± 0.11 |
| F-206    | 1.094                 | 5.96 ± 0.24 | 1.359     | 5.87 ± 0.02 | 8.643                 | 5.06 ± 0.16 | 12.589    | 4.90 ± 0.07 |
| F-207    | 0.521                 | 6.28 ± 0.57 | 3.008     | 5.52 ± 0.28 | 0.884                 | 6.05 ± 0.10 | 2.441     | 5.61 ± 0.19 |
| F-208    | 0.341                 | 6.47 ± 0.14 | 5.095     | 5.29 ± 0.20 | 1.905                 | 5.72 ± 0.11 | 5.991     | 5.22 ± 0.15 |
| F-209    | 0.184                 | 6.74 ± 0.24 | 1.744     | 5.76 ± 0.28 | 2.692                 | 5.57 ± 0.12 | 10.233    | 4.99 ± 0.05 |
| F-210    | 1.259                 | 5.90 ± 0.08 | 6.653     | 5.18 ± 0.14 | 3.548                 | 5.45 ± 0.08 | 4.332     | 5.36 ± 0.13 |
| F-211    | 1.898                 | 5.72 ± 0.03 | 3.659     | 5.44 ± 0.09 | 6.865                 | 5.16 ± 0.20 | 7.244     | 5.14 ± 0.11 |
| F-212    | 0.471                 | 6.33 ± 0.10 | 2.406     | 5.62 ± 0.12 | 2.512                 | 5.60 ± 0.11 | 4.713     | 5.33 ± 0.16 |
| F-213    | 0.697                 | 6.16 ± 0.04 | 4.550     | 5.34 ± 0.08 | 2.818                 | 5.55 ± 0.13 | 4.860     | 5.31 ± 0.17 |
| F-214    | 2.166                 | 5.66 ± 0.08 | 4.768     | 5.32 ± 0.05 | 6.813                 | 5.17 ± 0.06 | 4.606     | 5.34 ± 0.20 |
| F-215    | 1.019                 | 5.99 ± 0.08 | 1.774     | 5.75 ± 0.00 | 6.213                 | 5.21 ± 0.04 | 4.332     | 5.36 ± 0.17 |
| F-216    | 1.820                 | 5.74 ± 0.03 | 2.818     | 5.55 ± 0.00 | 5.329                 | 5.27 ± 0.05 | 4.137     | 5.38 ± 0.21 |
| F-217    | 1.072                 | 5.97 ± 0.03 | 0.065     | 7.19 ± 0.00 | 5.089                 | 5.29 ± 0.37 | 6.407     | 5.19 ± 0.11 |
| F-218    | 0.524                 | 6.28 ± 0.28 | 1.367     | 5.86 ± 0.28 | 3.802                 | 5.42 ± 0.26 | 2.929     | 5.53 ± 0.31 |
| F-219    | 0.290                 | 6.54 ± 0.17 | 2.956     | 5.53 ± 0.17 | 0.839                 | 6.08 ± 0.13 | 3.199     | 5.50 ± 0.06 |
| F-220    | 0.431                 | 6.37 ± 0.14 | 2.691     | 5.57 ± 0.14 | 1.698                 | 5.77 ± 0.34 | 3.055     | 5.52 ± 0.60 |
| F-221    | 2.710                 | 5.57 ± 0.29 | 3.420     | 5.47 ± 0.20 | 4.898                 | 5.31 ± 0.29 | 5.843     | 5.23 ± 0.15 |
| F-222    | 0.195                 | 6.71 ± 0.05 | 1.445     | 5.84 ± 0.06 | 0.259                 | 6.59 ± 0.23 | 1.479     | 5.83 ± 0.05 |
| F-223    | 3.499                 | 5.46 ± 0.03 | 14.256    | 4.85 ± 0.11 | 3.802                 | 5.42 ± 0.32 | 4.299     | 5.37 ± 0.20 |
| F-224    | 0.110                 | 6.96 ± 0.13 | 1.393     | 5.86 ± 0.07 | 0.168                 | 6.78 ± 0.16 | 0.912     | 6.04 ± 0.19 |
| F-225    | 0.057                 | 7.24 ± 0.18 | 0.776     | 6.11 ± 0.09 | 0.293                 | 6.53 ± 0.55 | 0.318     | 6.50 ± 0.18 |
| F-226    | 0.054                 | 7.27 ± 0.11 | 0.744     | 6.13 ± 0.07 | 0.089                 | 7.05 ± 0.18 | 0.351     | 6.46 ± 0.19 |
| F-227    | 0.053                 | 7.27 ± 0.07 | 3.258     | 5.49 ± 0.24 | 0.053                 | 7.28 ± 0.10 | 0.372     | 6.43 ± 0.18 |
| F-228    | 0.056                 | 7.25 ± 0.13 | 1.600     | 5.80 ± 0.12 | 0.080                 | 7.10 ± 0.11 | 1.820     | 5.74 ± 0.12 |
| F-229    | 1.063                 | 5.97 ± 0.10 | 4.596     | 5.34 ± 0.08 | 2.138                 | 5.67 ± 0.26 | 4.299     | 5.37 ± 0.17 |
| F-230    | 0.724                 | 6.14 ± 0.12 | 3.718     | 5.43 ± 0.08 | 2.171                 | 5.66 ± 0.20 | 3.890     | 5.41 ± 0.16 |
| F-231    | 2.679                 | 5.57 ± 0.13 | 7.786     | 5.11 ± 0.20 | 4.365                 | 5.36 ± 0.26 | 2.951     | 5.53 ± 0.31 |
| F-232    | 0.404                 | 6.39 ± 0.08 | 3.499     | 5.46 ± 0.04 | 1.113                 | 5.95 ± 0.22 | 2.380     | 5.62 ± 0.19 |
| F-233    | 0.978                 | 6.01 ± 0.09 | 8.825     | 5.05 ± 0.20 | 0.427                 | 6.37 ± 0.05 | 7.025     | 5.15 ± 0.19 |
| F-234    | 2.046                 | 5.69 ± 0.06 | 5.563     | 5.25 ± 0.06 | 2.862                 | 5.54 ± 0.34 | 4.043     | 5.39 ± 0.21 |
| F-235    | 0.029                 | 7.54 ± 0.22 | 0.565     | 6.25 ± 0.09 | 0.077                 | 7.11 ± 0.13 | 0.464     | 6.33 ± 0.09 |
| F-236    | 0.319                 | 6.50 ± 0.01 | 3.631     | 5.44 ± 0.04 | 0.533                 | 6.27 ± 0.24 | 1.725     | 5.76 ± 0.15 |
| F-237    | 0.056                 | 7.25 ± 0.13 | 0.409     | 6.39 ± 0.19 | 0.224                 | 6.65 ± 0.19 | 0.116     | 6.94 ± 0.03 |
| F-238    | 0.070                 | 7.15 ± 0.33 | 0.955     | 6.02 ± 0.18 | 0.525                 | 6.28 ± 0.27 | 2.344     | 5.63 ± 0.20 |
| F-239    | 2.215                 | 5.65 ± 0.06 | 7.786     | 5.11 ± 0.08 | 3.388                 | 5.47 ± 0.29 | 5.168     | 5.29 ± 0.16 |
| F-240    | 0.088                 | 7.06 ± 0.22 | 0.760     | 6.12 ± 0.09 | 0.110                 | 6.96 ± 0.13 | 1.965     | 5.71 ± 0.37 |
| F-241    | 0.676                 | 6.17 ± 0.16 | 9.201     | 5.04 ± 0.09 | 0.730                 | 6.14 ± 0.27 | 9.477     | 5.02 ± 0.05 |
| F-242    | 0.066                 | 7.18 ± 0.24 | 1.198     | 5.92 ± 0.15 | 0.263                 | 6.58 ± 0.14 | 1.193     | 5.92 ± 0.01 |
| F-243    | 0.092                 | 7.03 ± 0.10 | 3.565     | 5.45 ± 0.08 | 0.113                 | 6.95 ± 0.20 | 1.175     | 5.93 ± 0.15 |
| F-244    | 6.673                 | 5.18 ± 0.23 | 19.649    | 4.71 ± 0.01 | 8.191                 | 5.09 ± 0.14 | 10.077    | 5.00 ± 0.02 |
| F-245    | 0.129                 | 6.89 ± 0.12 | 3.388     | 5.47 ± 0.39 | 0.336                 | 6.47 ± 0.04 | 4.545     | 5.34 ± 0.18 |
| F-246    | 0.490                 | 6.31 ± 0.01 | 5.204     | 5.28 ± 0.11 | 2.089                 | 5.68 ± 0.10 | 8.861     | 5.05 ± 0.06 |

**Table S7. Activity of 5-NI test compounds against *Giardia lamblia***

| Compound | <i>G. lamblia</i> 713 |             |           |             | <i>G. lamblia</i> 106 |             |           |             |
|----------|-----------------------|-------------|-----------|-------------|-----------------------|-------------|-----------|-------------|
|          | MzS                   |             | MzR       |             | MzS                   |             | MzR       |             |
|          | EC50 (μM)             | pEC50       | EC50 (μM) | pEC50       | EC50 (μM)             | pEC50       | EC50 (μM) | pEC50       |
| F-247    | 0.340                 | 6.47 ± 0.11 | 8.861     | 5.05 ± 0.08 | 0.905                 | 6.04 ± 0.09 | 3.920     | 5.41 ± 0.07 |

Activity against two Mz-sensitive (MzS) isolates of *G. lamblia*, 713 and 106, and their syngeneic Mz-resistant (MzR) derivative lines, was determined as EC50 (in μM; geometric mean, n=3-6 experiments), the compound concentration that inhibits parasite growth by 50%, and is also shown as negative log10 value of the EC50 (pEC50; mean ± SE, n=3-6 experiments).

**Table S8. Cytotoxicity in human cells and therapeutic ratio of 5-NI compounds**

| Compound | HeLa            |                 | MzS <i>G. lamblia</i> | Therapeutic ratio |
|----------|-----------------|-----------------|-----------------------|-------------------|
|          | CC50 ( $\mu$ M) | pCC50           | EC50 ( $\mu$ M)       | CC50/EC50         |
| Mz       | > 50            | < 4.30          | 1.995                 | > 25              |
| A-201    | > 50            | < 4.30          | 12.531                | > 4               |
| A-202    | > 50            | < 4.30          | 0.161                 | > 311             |
| A-203    | > 50            | < 4.30          | 0.438                 | > 114             |
| A-204    | > 50            | < 4.30          | 0.179                 | > 279             |
| A-205    | > 50            | < 4.30          | 2.970                 | > 17              |
| A-206    | 26.48           | 4.58 $\pm$ 0.58 | 1.076                 | 25                |
| A-207    | > 50            | < 4.30          | 0.456                 | > 110             |
| A-208    | > 50            | < 4.30          | 0.299                 | > 167             |
| A-209    | > 50            | < 4.30          | 0.070                 | > 719             |
| A-210    | > 50            | < 4.30          | 1.061                 | > 47              |
| A-211    | > 50            | < 4.30          | 1.253                 | > 40              |
| A-212    | > 50            | < 4.30          | 2.600                 | > 19              |
| A-213    | > 50            | < 4.30          | 2.273                 | > 22              |
| A-214    | > 50            | < 4.30          | 1.662                 | > 30              |
| A-215    | > 50            | < 4.30          | 7.529                 | > 7               |
| A-216    | > 50            | < 4.30          | 18.670                | > 3               |
| A-217    | > 50            | < 4.30          | 0.858                 | > 58              |
| A-218    | > 50            | < 4.30          | > 20                  | N/A               |
| A-219    | > 50            | < 4.30          | 0.225                 | > 222             |
| A-220    | 37.69           | 4.42 $\pm$ 0.47 | 0.038                 | 994               |
| A-221    | > 50            | < 4.30          | 12.439                | > 4               |
| A-222    | > 50            | < 4.30          | 1.607                 | > 31              |
| A-223    | > 50            | < 4.30          | 2.558                 | > 20              |
| A-224    | > 50            | < 4.30          | 0.419                 | > 119             |
| A-225    | > 50            | < 4.30          | 0.164                 | > 304             |
| A-226    | > 50            | < 4.30          | 0.393                 | > 127             |
| A-227    | > 50            | < 4.30          | 0.198                 | > 253             |
| A-228    | > 50            | < 4.30          | 0.183                 | > 273             |
| A-229    | > 50            | < 4.30          | 3.359                 | > 15              |
| A-230    | > 50            | < 4.30          | 1.700                 | > 29              |
| A-231    | > 50            | < 4.30          | 1.916                 | > 26              |
| A-232    | > 50            | < 4.30          | 1.139                 | > 44              |
| A-233    | > 50            | < 4.30          | 0.196                 | > 255             |
| A-234    | > 50            | < 4.30          | 8.226                 | > 6               |
| A-235    | > 50            | < 4.30          | 2.487                 | > 20              |
| A-236    | > 50            | < 4.30          | 0.124                 | > 404             |
| A-237    | > 50            | < 4.30          | 0.033                 | > 1508            |
| A-238    | > 50            | < 4.30          | 0.667                 | > 75              |
| A-239    | > 50            | < 4.30          | 12.812                | > 4               |
| A-240    | > 50            | < 4.30          | 0.141                 | > 355             |
| A-241    | > 50            | < 4.30          | 0.049                 | > 1023            |
| A-242    | > 50            | < 4.30          | 0.112                 | > 445             |



**Table S8. Cytotoxicity in human cells and therapeutic ratio of 5-NI compounds**

| Compound | HeLa            |                 | MzS <i>G. lamblia</i> | Therapeutic ratio |
|----------|-----------------|-----------------|-----------------------|-------------------|
|          | CC50 ( $\mu$ M) | pCC50           | EC50 ( $\mu$ M)       | CC50/EC50         |
| A-243    | > 50            | < 4.30          | 0.057                 | > 880             |
| A-244    | > 50            | < 4.30          | 0.165                 | > 303             |
| A-245    | > 50            | < 4.30          | 0.902                 | > 55              |
| A-246    | > 50            | < 4.30          | 1.986                 | > 25              |
| A-247    | > 50            | < 4.30          | 0.352                 | > 142             |
| B-201    | > 50            | < 4.30          | 5.053                 | > 10              |
| B-202    | > 50            | < 4.30          | 0.352                 | > 142             |
| B-203    | > 50            | < 4.30          | 0.578                 | > 86              |
| B-204    | > 50            | < 4.30          | 0.345                 | > 145             |
| B-205    | > 50            | < 4.30          | 6.448                 | > 8               |
| B-206    | > 50            | < 4.30          | 1.963                 | > 25              |
| B-207    | > 50            | < 4.30          | 0.236                 | > 212             |
| B-208    | > 50            | < 4.30          | 0.346                 | > 144             |
| B-209    | 13.14           | 4.88 $\pm$ 0.44 | 0.210                 | 62                |
| B-210    | > 50            | < 4.30          | 0.844                 | > 59              |
| B-211    | > 50            | < 4.30          | 1.064                 | > 47              |
| B-212    | > 50            | < 4.30          | 3.625                 | > 14              |
| B-213    | > 50            | < 4.30          | 1.388                 | > 36              |
| B-214    | > 50            | < 4.30          | 1.834                 | > 27              |
| B-215    | > 50            | < 4.30          | 13.392                | > 4               |
| B-216    | > 50            | < 4.30          | 9.190                 | > 5               |
| B-217    | > 50            | < 4.30          | 0.860                 | > 58              |
| B-218    | > 50            | < 4.30          | 8.599                 | > 6               |
| B-219    | > 50            | < 4.30          | 0.278                 | > 180             |
| B-220    | > 50            | < 4.30          | 0.101                 | > 493             |
| B-221    | > 50            | < 4.30          | 2.622                 | > 19              |
| B-222    | > 50            | < 4.30          | 1.806                 | > 28              |
| B-223    | 43.24           | 4.36 $\pm$ 0.19 | 1.621                 | 27                |
| B-224    | > 50            | < 4.30          | 0.247                 | > 203             |
| B-225    | > 50            | < 4.30          | 0.099                 | > 506             |
| B-226    | > 50            | < 4.30          | 0.291                 | > 172             |
| B-227    | > 50            | < 4.30          | 0.285                 | > 176             |
| B-228    | > 50            | < 4.30          | 0.322                 | > 155             |
| B-229    | > 50            | < 4.30          | 1.081                 | > 46              |
| B-230    | > 50            | < 4.30          | 1.993                 | > 25              |
| B-231    | > 50            | < 4.30          | 5.984                 | > 8               |
| B-232    | > 50            | < 4.30          | 0.841                 | > 59              |
| B-233    | > 50            | < 4.30          | 0.207                 | > 242             |
| B-234    | > 50            | < 4.30          | 6.448                 | > 8               |
| B-235    | > 50            | < 4.30          | 1.681                 | > 30              |
| B-236    | > 50            | < 4.30          | 0.310                 | > 161             |
| B-237    | > 50            | < 4.30          | 0.113                 | > 441             |
| B-238    | > 50            | < 4.30          | 3.574                 | > 14              |

**Table S8. Cytotoxicity in human cells and therapeutic ratio of 5-NI compounds**

| Compound | HeLa            |                 | MzS <i>G. lamblia</i> | Therapeutic ratio |
|----------|-----------------|-----------------|-----------------------|-------------------|
|          | CC50 ( $\mu$ M) | pCC50           | EC50 ( $\mu$ M)       | CC50/EC50         |
| B-239    | > 50            | < 4.30          | 15.296                | > 3               |
| B-240    | > 50            | < 4.30          | 0.938                 | > 53              |
| B-241    | > 50            | < 4.30          | 0.050                 | > 1008            |
| B-242    | > 50            | < 4.30          | 0.066                 | > 763             |
| B-243    | > 50            | < 4.30          | 0.101                 | > 495             |
| B-244    | > 50            | < 4.30          | 0.110                 | > 455             |
| B-245    | > 50            | < 4.30          | 0.442                 | > 113             |
| B-246    | > 50            | < 4.30          | 0.878                 | > 57              |
| B-247    | > 50            | < 4.30          | 0.177                 | > 282             |
| C-201    | > 50            | < 4.30          | 1.257                 | > 40              |
| C-202    | > 50            | < 4.30          | 0.180                 | > 277             |
| C-203    | > 50            | < 4.30          | 0.486                 | > 103             |
| C-204    | > 50            | < 4.30          | > 20                  | N/A               |
| C-205    | > 50            | < 4.30          | 3.226                 | > 15              |
| C-206    | > 50            | < 4.30          | 1.838                 | > 27              |
| C-207    | > 50            | < 4.30          | 0.366                 | > 137             |
| C-208    | > 50            | < 4.30          | 0.439                 | > 114             |
| C-209    | 27.41           | 4.56 $\pm$ 0.32 | 0.212                 | 129               |
| C-210    | > 50            | < 4.30          | 0.544                 | > 92              |
| C-211    | > 50            | < 4.30          | 0.831                 | > 60              |
| C-212    | > 50            | < 4.30          | 2.917                 | > 17              |
| C-213    | > 50            | < 4.30          | 2.044                 | > 24              |
| C-214    | > 50            | < 4.30          | 1.181                 | > 42              |
| C-215    | > 50            | < 4.30          | 3.696                 | > 14              |
| C-216    | > 50            | < 4.30          | 3.297                 | > 15              |
| C-217    | > 50            | < 4.30          | 2.209                 | > 23              |
| C-218    | > 50            | < 4.30          | 3.961                 | > 13              |
| C-219    | > 50            | < 4.30          | 0.357                 | > 140             |
| C-220    | 41.37           | 4.38 $\pm$ 0.04 | 0.075                 | 555               |
| C-221    | > 50            | < 4.30          | 2.733                 | > 18              |
| C-222    | > 50            | < 4.30          | 0.436                 | > 115             |
| C-223    | > 50            | < 4.30          | 1.676                 | > 30              |
| C-224    | > 50            | < 4.30          | 0.136                 | > 368             |
| C-225    | > 50            | < 4.30          | 2.546                 | > 20              |
| C-226    | > 50            | < 4.30          | 0.067                 | > 752             |
| C-227    | > 50            | < 4.30          | 0.039                 | > 1270            |
| C-228    | > 50            | < 4.30          | 0.449                 | > 111             |
| C-229    | > 50            | < 4.30          | 0.256                 | > 195             |
| C-230    | > 50            | < 4.30          | 0.139                 | > 359             |
| C-231    | > 50            | < 4.30          | 0.251                 | > 199             |
| C-232    | > 50            | < 4.30          | 1.053                 | > 47              |
| C-233    | > 50            | < 4.30          | 0.178                 | > 281             |
| C-234    | > 50            | < 4.30          | 0.142                 | > 351             |

**Table S8. Cytotoxicity in human cells and therapeutic ratio of 5-NI compounds**

| Compound | HeLa            |                 | MzS <i>G. lamblia</i> | Therapeutic ratio |
|----------|-----------------|-----------------|-----------------------|-------------------|
|          | CC50 ( $\mu$ M) | pCC50           | EC50 ( $\mu$ M)       | CC50/EC50         |
| C-235    | > 50            | < 4.30          | 0.081                 | > 621             |
| C-236    | > 50            | < 4.30          | 0.264                 | > 190             |
| C-237    | > 50            | < 4.30          | 1.208                 | > 41              |
| C-238    | > 50            | < 4.30          | 1.744                 | > 29              |
| C-239    | > 50            | < 4.30          | 3.990                 | > 13              |
| C-240    | > 50            | < 4.30          | 1.220                 | > 41              |
| C-241    | > 50            | < 4.30          | 0.455                 | > 110             |
| C-242    | > 50            | < 4.30          | 3.162                 | > 16              |
| C-243    | > 50            | < 4.30          | 1.533                 | > 33              |
| C-244    | > 50            | < 4.30          | 0.443                 | > 113             |
| C-245    | > 50            | < 4.30          | 1.983                 | > 25              |
| C-246    | > 50            | < 4.30          | 0.540                 | > 93              |
| C-247    | > 50            | < 4.30          | 3.549                 | > 14              |
| D-201    | > 50            | < 4.30          | 17.769                | > 3               |
| D-202    | > 50            | < 4.30          | 1.750                 | > 29              |
| D-203    | > 50            | < 4.30          | 15.689                | > 3               |
| D-204    | > 50            | < 4.30          | 12.482                | > 4               |
| D-205    | > 50            | < 4.30          | 14.328                | > 3               |
| D-206    | > 50            | < 4.30          | 9.620                 | > 5               |
| D-207    | > 50            | < 4.30          | 8.148                 | > 6               |
| D-208    | 49.36           | 4.31 $\pm$ 0.11 | 5.474                 | 9                 |
| D-209    | > 50            | < 4.30          | 4.596                 | > 11              |
| D-210    | > 50            | < 4.30          | 14.803                | > 3               |
| D-211    | > 50            | < 4.30          | 14.482                | > 3               |
| D-212    | > 50            | < 4.30          | 12.405                | > 4               |
| D-213    | > 50            | < 4.30          | 14.804                | > 3               |
| D-215    | > 50            | < 4.30          | 13.117                | > 4               |
| D-216    | > 50            | < 4.30          | 13.410                | > 4               |
| D-217    | > 50            | < 4.30          | 5.982                 | > 8               |
| D-218    | > 50            | < 4.30          | 13.861                | > 4               |
| D-219    | > 50            | < 4.30          | 8.190                 | > 6               |
| D-220    | 48.28           | 4.32 $\pm$ 0.00 | 2.883                 | 17                |
| D-221    | > 50            | < 4.30          | 12.827                | > 4               |
| D-222    | 43.56           | 4.36 $\pm$ 0.36 | 19.303                | 2                 |
| D-223    | > 50            | < 4.30          | > 20                  | N/A               |
| D-224    | > 50            | < 4.30          | 10.987                | > 5               |
| D-225    | > 50            | < 4.30          | 4.402                 | > 11              |
| D-226    | > 50            | < 4.30          | 8.151                 | > 6               |
| D-227    | > 50            | < 4.30          | 10.987                | > 5               |
| D-228    | > 50            | < 4.30          | 8.906                 | > 6               |
| D-229    | > 50            | < 4.30          | 16.178                | > 3               |
| D-230    | > 50            | < 4.30          | 12.544                | > 4               |
| D-231    | > 50            | < 4.30          | 13.109                | > 4               |

**Table S8. Cytotoxicity in human cells and therapeutic ratio of 5-NI compounds**

| Compound | HeLa            |                 | MzS <i>G. lamblia</i> | Therapeutic ratio |
|----------|-----------------|-----------------|-----------------------|-------------------|
|          | CC50 ( $\mu$ M) | pCC50           | EC50 ( $\mu$ M)       | CC50/EC50         |
| D-232    | > 50            | < 4.30          | 12.969                | > 4               |
| D-233    | > 50            | < 4.30          | 8.903                 | > 6               |
| D-234    | > 50            | < 4.30          | 11.166                | > 4               |
| D-235    | > 50            | < 4.30          | 11.543                | > 4               |
| D-236    | > 50            | < 4.30          | 8.705                 | > 6               |
| D-237    | > 50            | < 4.30          | 2.068                 | > 24              |
| D-238    | > 50            | < 4.30          | 14.810                | > 3               |
| D-239    | > 50            | < 4.30          | 16.357                | > 3               |
| D-240    | > 50            | < 4.30          | 2.095                 | > 24              |
| D-241    | > 50            | < 4.30          | 0.696                 | > 72              |
| D-242    | > 50            | < 4.30          | 4.019                 | > 12              |
| D-243    | > 50            | < 4.30          | 3.756                 | > 13              |
| D-244    | > 50            | < 4.30          | 8.065                 | > 6               |
| D-245    | > 50            | < 4.30          | 10.167                | > 5               |
| D-246    | > 50            | < 4.30          | 8.804                 | > 6               |
| D-247    | > 50            | < 4.30          | 3.519                 | > 14              |
| E-201    | > 50            | < 4.30          | 0.103                 | > 487             |
| E-202    | > 50            | < 4.30          | 0.039                 | > 1272            |
| E-203    | > 50            | < 4.30          | 0.011                 | > 4663            |
| E-204    | > 50            | < 4.30          | 0.023                 | > 2130            |
| E-205    | > 50            | < 4.30          | 0.075                 | > 664             |
| E-206    | 48.75           | 4.31 $\pm$ 0.26 | 0.165                 | 296               |
| E-207    | 39.20           | 4.41 $\pm$ 0.13 | 0.019                 | 2099              |
| E-208    | 37.51           | 4.43 $\pm$ 0.43 | 0.016                 | 2411              |
| E-209    | > 50            | < 4.30          | 0.358                 | > 140             |
| E-210    | > 50            | < 4.30          | 0.006                 | > 8362            |
| E-211    | > 50            | < 4.30          | 0.043                 | > 1172            |
| E-212    | > 50            | < 4.30          | 0.161                 | > 311             |
| E-213    | > 50            | < 4.30          | 0.014                 | > 3678            |
| E-214    | > 50            | < 4.30          | 0.042                 | > 1199            |
| E-215    | > 50            | < 4.30          | 0.039                 | > 1275            |
| E-216    | > 50            | < 4.30          | 0.209                 | > 239             |
| E-217    | 30.20           | 4.52 $\pm$ 0.03 | 0.156                 | 193               |
| E-218    | > 50            | < 4.30          | 1.684                 | > 30              |
| E-219    | > 50            | < 4.30          | 0.014                 | > 3457            |
| E-220    | > 50            | < 4.30          | 0.016                 | > 3140            |
| E-221    | > 50            | < 4.30          | 0.044                 | > 1145            |
| E-222    | > 50            | < 4.30          | 0.008                 | > 6184            |
| E-223    | 36.14           | 4.44 $\pm$ 0.06 | 0.020                 | 1784              |
| E-224    | > 50            | < 4.30          | 0.010                 | > 4879            |
| E-225    | > 50            | < 4.30          | 0.012                 | > 4181            |
| E-226    | > 50            | < 4.30          | 0.008                 | > 6058            |
| E-227    | 47.46           | 4.32 $\pm$ 0.32 | 0.026                 | 1851              |

**Table S8. Cytotoxicity in human cells and therapeutic ratio of 5-NI compounds**

| Compound | HeLa            |                 | MzS <i>G. lamblia</i> | Therapeutic ratio |
|----------|-----------------|-----------------|-----------------------|-------------------|
|          | CC50 ( $\mu$ M) | pCC50           | EC50 ( $\mu$ M)       | CC50/EC50         |
| E-228    | 36.78           | 4.43 $\pm$ 0.43 | 0.011                 | 3339              |
| E-229    | > 50            | < 4.30          | 0.021                 | > 2346            |
| E-230    | > 50            | < 4.30          | 0.005                 | > 10264           |
| E-231    | > 50            | < 4.30          | 0.036                 | > 1377            |
| E-232    | > 50            | < 4.30          | 0.010                 | > 5244            |
| E-233    | > 50            | < 4.30          | 0.123                 | > 406             |
| E-234    | > 50            | < 4.30          | 0.049                 | > 1013            |
| E-235    | > 50            | < 4.30          | 0.018                 | > 2723            |
| E-236    | > 50            | < 4.30          | 0.009                 | > 5440            |
| E-237    | > 50            | < 4.30          | 0.019                 | > 2590            |
| E-238    | > 50            | < 4.30          | 0.012                 | > 4024            |
| E-239    | > 50            | < 4.30          | 0.284                 | > 176             |
| E-240    | > 50            | < 4.30          | 0.013                 | > 3944            |
| E-241    | > 50            | < 4.30          | 0.020                 | > 2537            |
| E-242    | > 50            | < 4.30          | 0.013                 | > 3822            |
| E-243    | > 50            | < 4.30          | 0.034                 | > 1479            |
| E-244    | > 50            | < 4.30          | 0.025                 | > 2015            |
| E-245    | > 50            | < 4.30          | 0.003                 | > 19304           |
| E-246    | > 50            | < 4.30          | 0.003                 | > 16430           |
| E-247    | > 50            | < 4.30          | 0.005                 | > 9785            |
| F-201    | > 50            | < 4.30          | 0.788                 | > 63              |
| F-202    | > 50            | < 4.30          | 0.088                 | > 568             |
| F-203    | > 50            | < 4.30          | 0.343                 | > 146             |
| F-204    | > 50            | < 4.30          | 0.148                 | > 339             |
| F-205    | > 50            | < 4.30          | 1.975                 | > 25              |
| F-206    | > 50            | < 4.30          | 1.094                 | > 46              |
| F-207    | > 50            | < 4.30          | 0.521                 | > 96              |
| F-208    | > 50            | < 4.30          | 0.341                 | > 147             |
| F-209    | 41.99           | 4.38 $\pm$ 0.07 | 0.184                 | 228               |
| F-210    | > 50            | < 4.30          | 1.259                 | > 40              |
| F-211    | > 50            | < 4.30          | 1.898                 | > 26              |
| F-212    | > 50            | < 4.30          | 0.471                 | > 106             |
| F-213    | > 50            | < 4.30          | 0.697                 | > 72              |
| F-214    | > 50            | < 4.30          | 2.166                 | > 23              |
| F-215    | > 50            | < 4.30          | 1.019                 | > 49              |
| F-216    | > 50            | < 4.30          | 1.820                 | > 27              |
| F-217    | > 50            | < 4.30          | 1.072                 | > 47              |
| F-218    | > 50            | < 4.30          | 0.524                 | > 95              |
| F-219    | > 50            | < 4.30          | 0.290                 | > 173             |
| F-220    | 46.54           | 4.33 $\pm$ 0.03 | 0.431                 | 108               |
| F-221    | > 50            | < 4.30          | 2.710                 | > 18              |
| F-222    | > 50            | < 4.30          | 0.195                 | > 256             |
| F-223    | > 50            | < 4.30          | 3.499                 | > 14              |

**Table S8. Cytotoxicity in human cells and therapeutic ratio of 5-NI compounds**

| Compound | HeLa      |             | MzS <i>G. lamblia</i> | Therapeutic ratio |
|----------|-----------|-------------|-----------------------|-------------------|
|          | CC50 (μM) | pCC50       | EC50 (μM)             | CC50/EC50         |
| F-224    | > 50      | < 4.30      | 0.110                 | > 455             |
| F-225    | > 50      | < 4.30      | 0.057                 | > 874             |
| F-226    | > 50      | < 4.30      | 0.054                 | > 924             |
| F-227    | > 50      | < 4.30      | 0.053                 | > 940             |
| F-228    | > 50      | < 4.30      | 0.056                 | > 897             |
| F-229    | > 50      | < 4.30      | 1.063                 | > 47              |
| F-230    | > 50      | < 4.30      | 0.724                 | > 69              |
| F-231    | > 50      | < 4.30      | 2.679                 | > 19              |
| F-232    | > 50      | < 4.30      | 0.404                 | > 124             |
| F-233    | > 50      | < 4.30      | 0.978                 | > 51              |
| F-234    | > 50      | < 4.30      | 2.046                 | > 24              |
| F-235    | > 50      | < 4.30      | 0.029                 | > 1751            |
| F-236    | > 50      | < 4.30      | 0.319                 | > 157             |
| F-237    | > 50      | < 4.30      | 0.056                 | > 897             |
| F-238    | > 50      | < 4.30      | 0.070                 | > 712             |
| F-239    | > 50      | < 4.30      | 2.215                 | > 23              |
| F-240    | > 50      | < 4.30      | 0.088                 | > 571             |
| F-241    | > 50      | < 4.30      | 0.676                 | > 74              |
| F-242    | > 50      | < 4.30      | 0.066                 | > 757             |
| F-243    | > 50      | < 4.30      | 0.092                 | > 541             |
| F-244    | > 50      | < 4.30      | 6.673                 | > 7               |
| F-245    | > 50      | < 4.30      | 0.129                 | > 388             |
| F-246    | > 50      | < 4.30      | 0.490                 | > 102             |
| F-247    | 45.19     | 4.34 ± 0.00 | 0.340                 | 133               |

Toxicity against the human HeLa cells was determined as CC50 (in μM; geometric mean, n=3-6 experiments), the compound concentration that kills 50% of HeLa cells in a cytotoxicity assay, is also shown as negative log10 value of the CC50 (pCC50; mean ± SE, n=3-6 experiments). Therapeutic ratio, the ratio of CC50 in HeLa cells to EC50 of *G. lamblia* (strain 713), reflects the relative selectivity of compound potency against *Giardia* compared to cytotoxicity in HeLa cells, with higher ratios indicating greater selectivity for the parasite.
